# Supplementary material for: SnCl4 Promoted Efficient Cleavage of Acetal/Ketal Groups with the Assistance of Water in CH2Cl2
Source: MDPI journal article supplement (doi:10.3390/molecules27238258), 2022-11-26

## Supporting Information

### Table of Contents

|                                 |    |
|---------------------------------|----|
| 1. Figure S1.....               | S2 |
| 2. Synthesis of substrates..... | S2 |
| 3. References.....              | S7 |
| 4. Copies of NMR spectra.....   | S8 |

1. Figure S1. Treatment of methyl 2,3-di-O-pivaloyl- $\alpha$ -D-glucopyranoside **8** with 1 equiv of SnCl<sub>4</sub> in dry *d*-CH<sub>3</sub>Cl.

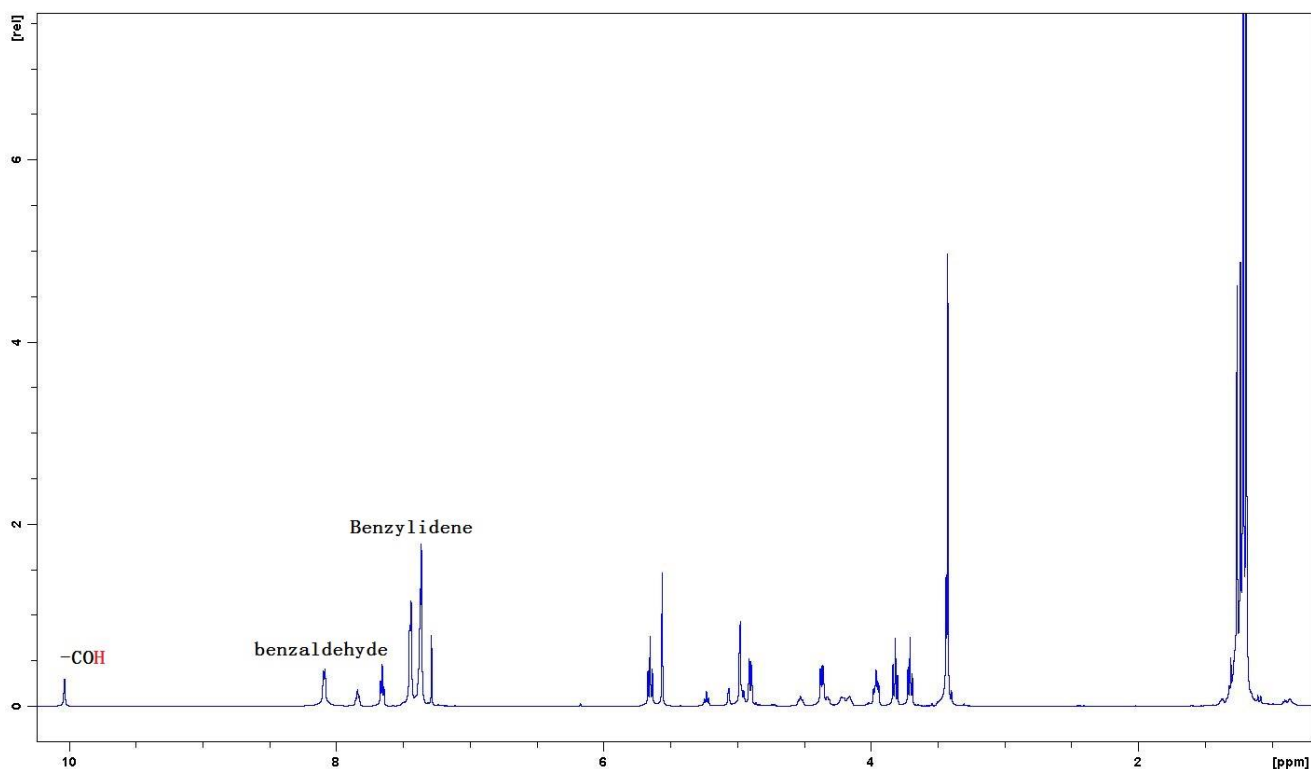

Benzaldehyde instead of dichlorotoluene was observed in the NMR spectrum. The reaction was terminated when the trace amounts of water in the *d*-chloroform is consumed.

2. Synthesis of substrates

Methyl 2,3-di-*O*-benzyl-4,6-*O*-benzylidene- $\alpha$ -D-glucopyranoside **1a**

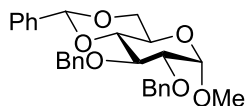

Methyl 2,3-di-*O*-benzyl-4,6-*O*-benzylidene- $\alpha$ -D-glucopyranoside **1a** was synthesized as previously reported.<sup>1</sup> <sup>1</sup>H NMR (600 MHz, CDCl<sub>3</sub>)  $\delta$  7.56 – 7.43 (m, 2H), 7.43 – 7.22 (m, 13H), 5.55 (s, 1H), 4.91 (d, *J* = 11.3 Hz, 1H), 4.84 (dd, *J* = 11.7, 8.4 Hz, 2H), 4.70 (d, *J* = 12.1 Hz, 1H), 4.60 (d, *J* = 3.6 Hz, 1H), 4.26 (dd, *J* = 10.2, 4.8 Hz, 1H), 4.05 (t, *J* = 9.3 Hz, 1H), 3.83 (td, *J* = 10.0, 4.8 Hz, 1H), 3.71 (t, *J* = 10.3 Hz, 1H), 3.60 (t, *J* = 9.4 Hz, 1H), 3.56 (dd, *J* = 9.3, 3.7 Hz, 1H), 3.40 (s, 3H).

Methyl 2,3-di-*O*-benzyl-4,6-*O*-(*p*-methoxybenzylidene)- $\alpha$ -D-glucopyranoside **1b**

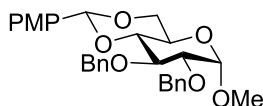

Methyl 2,3-di-*O*-benzyl-4,6-*O*-(*p*-methoxybenzylidene)- $\alpha$ -D-glucopyranoside **1b** was synthesized as previously reported.<sup>1</sup> <sup>1</sup>H NMR (400 MHz, CDCl<sub>3</sub>)  $\delta$  7.50 – 7.15 (m, 12H), 6.94 – 6.81 (m, 2H), 5.51 (s, 1H), 4.97 – 4.78 (m, 3H), 4.69 (d, *J* = 12.2 Hz, 1H), 4.59 (d, *J* = 3.7 Hz, 1H), 4.24 (dd, *J* = 10.1, 4.7 Hz, 1H), 4.04 (t, *J* = 9.3 Hz, 1H), 3.82 (s, 4H), 3.69 (t, *J* = 10.2 Hz, 1H), 3.64 – 3.49 (m, 2H), 3.40 (s, 3H).

Methyl 2,3-di-*O*-benzyl-4,6-*O*-(*p*-bromobenzylidene)- $\alpha$ -D-glucopyranoside **1c**

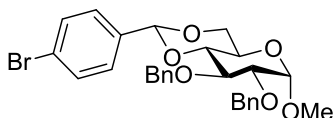

Methyl 2,3-di-*O*-benzyl-4,6-*O*-(*p*-bromobenzylidene)- $\alpha$ -D-glucopyranoside **1c** was synthesized as previously reported.<sup>2</sup> <sup>1</sup>H NMR (400 MHz, CDCl<sub>3</sub>)  $\delta$  7.54 – 7.48 (m, 2H), 7.40 – 7.27 (m, 12H), 5.48 (s, 1H), 4.91 – 4.81 (m, 3H), 4.70 (d, *J* = 12.2 Hz, 1H), 4.59 (d, *J* = 3.7 Hz, 1H), 4.25 (dd, *J* = 10.1, 4.7 Hz, 1H), 4.02 (t, *J* = 9.3 Hz, 1H), 3.80 (td, *J* = 9.9, 4.7 Hz, 1H), 3.68 (t, *J* = 10.3 Hz, 1H), 3.61 – 3.53 (m, 2H), 3.40 (s, 3H).

### Methyl 2,3-di-*O*-methyl-4,6-*O*-benzylidene- $\alpha$ -D-glucopyranoside **3**

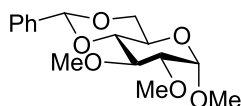

Methyl 2,3-di-*O*-methyl-4,6-*O*-benzylidene- $\alpha$ -D-glucopyranoside **3** was synthesized as previously reported.<sup>3</sup> Spectral data of **3**: <sup>1</sup>H NMR (400 MHz, CDCl<sub>3</sub>)  $\delta$  7.61 – 7.44 (m, 2H), 7.44 – 7.31 (m, 3H), 5.55 (s, 1H), 4.86 (d,  $J$  = 3.7 Hz, 1H), 4.29 (dd,  $J$  = 9.9, 4.5 Hz, 1H), 3.82 (td,  $J$  = 9.7, 4.5 Hz, 1H), 3.71 (dt,  $J$  = 15.3, 9.6 Hz, 2H), 3.64 (s, 3H), 3.56 (s, 3H), 3.45 (s, 3H), 3.30 (dd,  $J$  = 9.2, 3.7 Hz, 1H).

### Methyl 2,3-di-*O*-acetyl-4,6-*O*-benzylidene- $\alpha$ -D-glucopyranoside **5**

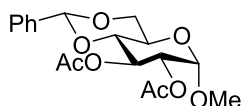

Methyl 2,3-di-*O*-acetyl-4,6-*O*-benzylidene- $\alpha$ -D-glucopyranoside **5** was synthesized as previously reported.<sup>1</sup> <sup>1</sup>H NMR (400 MHz, CDCl<sub>3</sub>)  $\delta$  7.49 – 7.40 (m, 2H), 7.40 – 7.28 (m, 3H), 5.58 (t,  $J$  = 9.7 Hz, 1H), 5.50 (s, 1H), 5.01 – 4.86 (m, 2H), 4.30 (dd,  $J$  = 10.3, 4.8 Hz, 1H), 4.16 – 4.05 (m, 1H), 3.92 (td,  $J$  = 9.8, 4.6 Hz, 1H), 3.77 (t,  $J$  = 10.3 Hz, 1H), 3.65 (t,  $J$  = 9.6 Hz, 1H), 3.41 (s, 3H), 2.09 (s, 3H), 2.05 (s, 3H).

### Methyl 2,3-di-*O*-pivaloyl-4,6-*O*-benzylidene- $\alpha$ -D-glucopyranoside **7**

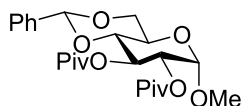

Methyl 2,3-di-*O*-pivaloyl-4,6-*O*-benzylidene- $\alpha$ -D-glucopyranoside **7** was synthesized as previously reported.<sup>3,4</sup> <sup>1</sup>H NMR (400 MHz, CDCl<sub>3</sub>)  $\delta$  7.41 (dd,  $J$  = 6.8, 2.9 Hz, 2H), 7.37 – 7.30 (m, 3H), 5.61 (d,  $J$  = 9.8 Hz, 1H), 5.53 (s, 1H), 4.95 (d,  $J$  = 3.8 Hz, 1H), 4.86 (dd,  $J$  = 9.9, 3.7 Hz, 1H), 4.32 (dd,  $J$  = 10.2, 4.8 Hz, 1H), 3.93 (td,  $J$  = 9.9, 4.7 Hz, 1H), 3.78 (t,  $J$  = 10.3 Hz, 1H), 3.67 (t,  $J$  = 9.6 Hz, 1H), 3.40 (s, 3H), 1.19 (s, 9H), 1.16 (s, 9H).

### Methyl 2,3-di-*O*-benzoyl-4,6-*O*-benzylidene- $\beta$ -D-glucopyranoside **9**

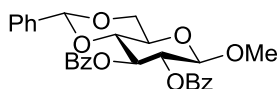

Methyl 2,3-di-*O*-benzoyl-4,6-*O*-benzylidene- $\beta$ -D-glucopyranoside **9** was synthesized as previously reported.<sup>1</sup> <sup>1</sup>H NMR (400 MHz, CDCl<sub>3</sub>)  $\delta$  7.96 (t,  $J$  = 7.6 Hz, 4H), 7.61 – 7.28 (m, 11H), 5.79 (t,  $J$  = 9.6 Hz, 1H), 5.56 (s, 1H), 5.47 (t,  $J$  = 8.7 Hz, 1H), 4.72 (d,  $J$  = 7.9 Hz, 1H), 4.46 (dd,  $J$  = 10.5, 4.9 Hz, 1H), 3.92 (dt,  $J$  = 14.3, 9.9 Hz, 2H), 3.71 (td,  $J$  = 9.7, 4.9 Hz, 1H), 3.54 (s, 3H).

### Benzyl 2,3-di-*O*-acetyl-4,6-*O*-benzylidene-1-thio- $\beta$ -D-glucopyranoside **11**

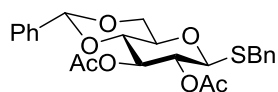

Benzyl 4,6-*O*-benzylidene-1-thio- $\beta$ -D-glucopyranoside (100 mg, 0.27 mmol), pyridine (1.0 mL), and acetic anhydride (0.1 mL, 1.07 mmol) were combined in a round-bottom flask and stirred at room temperature for 2 h. After completion of reaction, the reaction mixture was concentrated under reduced pressure to give the crude compound. Purification on a silica gel column afforded **11** as a white solid (elution with ethyl acetate/petroleum ether = 1:4 (v/v); 110 mg, 90% yield). m.p. 214.8–217.4,  $[\alpha]_D^{25}$  = -119.5 (c 0.4, CHCl<sub>3</sub>). <sup>1</sup>H NMR (400 MHz, CDCl<sub>3</sub>)  $\delta$  7.49 – 7.27 (m, 11H), 5.50 (s, 1H), 5.27 (t,  $J$  = 9.4 Hz, 1H), 5.08 (t,  $J$  = 9.5 Hz, 1H), 4.42 (d,  $J$  = 10.0 Hz, 1H), 4.35 (dd,  $J$  = 10.6, 4.9 Hz, 1H), 3.89 (q,  $J$  = 12.9 Hz, 2H), 3.77 (t,  $J$  = 10.2 Hz, 1H), 3.68 (t,  $J$  = 9.6 Hz, 1H), 3.47 (td,  $J$  = 9.7, 4.9 Hz, 1H), 2.04 (s, 3H), 2.03 (s, 3H). <sup>13</sup>C NMR (100 MHz, CDCl<sub>3</sub>)  $\delta$  170.04, 169.67, 136.86, 136.73, 129.16, 129.03, 128.65, 128.26, 127.45, 126.12, 101.49, 83.07, 78.36, 72.71, 70.64, 70.52, 68.45, 34.25, 20.79, 20.72. HRMS (ESI-TOF)  $m/z$   $[M + Na]^+$  calcd for [C<sub>24</sub>H<sub>26</sub>O<sub>7</sub>SN]<sup>+</sup>: 481.1297; found: 481.1295.

### 4-Methylphenyl 2,3-di-*O*-acetyl-4,6-*O*-benzylidene-1-thio- $\beta$ -D-glucopyranoside **13**

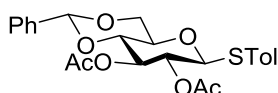

4-Methylphenyl 2,3-di-*O*-acetyl-4,6-*O*-benzylidene-1-thio- $\beta$ -D-glucopyranoside **13** was synthesized as previously reported.<sup>5</sup> <sup>1</sup>H NMR (400 MHz, CDCl<sub>3</sub>)  $\delta$  7.51 – 7.31 (m, 7H), 7.15 (d,  $J$  = 7.8 Hz, 2H), 5.49 (s, 1H), 5.33 (t,  $J$  = 9.4 Hz, 1H), 4.97 (t,  $J$  = 9.5 Hz, 1H), 4.74 (d,  $J$  = 10.1 Hz, 1H),

4.38 (dd,  $J = 10.7, 4.8$  Hz, 1H), 3.79 (t,  $J = 10.2$  Hz, 1H), 3.71 – 3.49 (m, 1H), 2.36 (s, 3H), 2.10 (d,  $J = 5.8$  Hz, 3H), 2.03 (s, 3H).

### Methyl 2,3-di-*O*-benzyl-4,6-*O*-benzylidene- $\alpha$ -D-galactopyranoside **15**

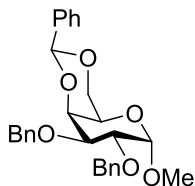

Methyl 2,3-di-*O*-benzyl-4,6-*O*-benzylidene- $\alpha$ -D-galactopyranoside **15** was synthesized as previously reported.<sup>1</sup> <sup>1</sup>H NMR (400 MHz, CDCl<sub>3</sub>)  $\delta$  7.60 – 7.47 (m, 2H), 7.35 (tdd,  $J = 27.0, 13.9, 7.4$  Hz, 13H), 5.48 (s, 1H), 4.86 (dd,  $J = 19.5, 12.2$  Hz, 2H), 4.79 – 4.62 (m, 3H), 4.25 – 4.14 (m, 2H), 4.07 (dd,  $J = 10.1, 3.4$  Hz, 1H), 3.99 (td,  $J = 10.1, 2.6$  Hz, 2H), 3.58 (s, 1H), 3.38 (s, 3H).

### Methyl 2,3-di-*O*-benzyl-4,6-*O*-benzylidene- $\beta$ -D-galactopyranoside **17**

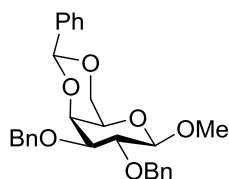

Methyl 2,3-di-*O*-benzyl-4,6-*O*-benzylidene- $\beta$ -D-galactopyranoside **17** was synthesized as previously reported.<sup>6</sup> <sup>1</sup>H NMR (400 MHz, CDCl<sub>3</sub>)  $\delta$  7.60 – 7.52 (m, 2H), 7.34 (dd,  $J = 22.1, 16.2$  Hz, 13H), 5.50 (s, 1H), 4.91 (d,  $J = 10.9$  Hz, 1H), 4.84 – 4.70 (m, 3H), 4.37 – 4.26 (m, 2H), 4.11 (dd,  $J = 3.7, 1.0$  Hz, 1H), 4.02 (dd,  $J = 12.3, 1.8$  Hz, 1H), 3.84 (dd,  $J = 9.7, 7.7$  Hz, 1H), 3.59 (s, 3H), 3.56 (dd,  $J = 9.7, 3.6$  Hz, 1H).

### Methyl 2,3-di-*O*-acetyl-4,6-*O*-benzylidene- $\alpha$ -D-mannopyranoside **19**

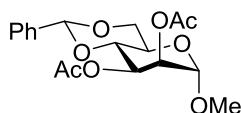

Methyl 2,3-di-*O*-acetyl-4,6-*O*-benzylidene- $\alpha$ -D-mannopyranoside **19** was synthesized according to the procedure for the synthesis of **5**.<sup>7</sup> <sup>1</sup>H NMR (400 MHz, CDCl<sub>3</sub>)  $\delta$  7.46 (dd,  $J = 6.8, 2.8$  Hz, 2H), 7.36 (dd,  $J = 5.2, 2.1$  Hz, 3H), 5.58 (s, 1H), 5.45 – 5.32 (m, 2H), 4.67 (d,  $J = 1.6$  Hz, 1H), 4.29 (dd,  $J = 10.0, 4.4$  Hz, 1H), 4.05 (t,  $J = 9.7$  Hz, 1H), 3.95 (td,  $J = 9.6, 4.4$  Hz, 1H), 3.86 (t,  $J = 10.1$  Hz, 1H), 3.40 (s, 3H), 2.17 (s, 3H), 2.01 (s, 3H).

### Methyl 2,6-di-*O*-benzyl 3,4-*O*-isopropylidene- $\alpha$ -D-galactopyranoside **21**

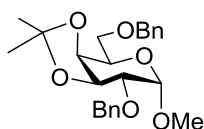

Methyl 2,6-di-*O*-benzyl 3,4-*O*-isopropylidene- $\alpha$ -D-galactopyranoside **21** was synthesized as previously reported.<sup>8</sup> <sup>1</sup>H NMR (400 MHz, CDCl<sub>3</sub>)  $\delta$  7.42 – 7.23 (m, 10H), 4.82 (d,  $J = 12.6$  Hz, 1H), 4.76 – 4.61 (m, 3H), 4.53 (d,  $J = 12.1$  Hz, 1H), 4.34 (dd,  $J = 7.9, 5.4$  Hz, 1H), 4.25 – 4.07 (m, 2H), 3.82 – 3.64 (m, 2H), 3.51 (dd,  $J = 7.9, 3.5$  Hz, 1H), 3.40 (s, 3H), 1.38 (s, 3H), 1.33 (s, 3H).

### 1,2:5,6-Di-*O*-isopropylidene-3-*O*-benzoyl- $\alpha$ -D-glucofuranose **23**

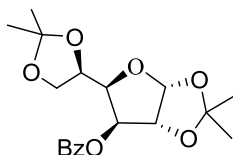

1,2:5,6-Di-*O*-isopropylidene-3-*O*-benzoyl- $\alpha$ -D-glucofuranose **23** was prepared using literature procedure.<sup>9</sup> <sup>1</sup>H NMR (400 MHz, CDCl<sub>3</sub>)  $\delta$  8.09 – 7.95 (m, 2H), 7.67 – 7.54 (m, 1H), 7.46 (t,  $J = 7.6$  Hz, 2H), 5.95 (d,  $J = 3.7$  Hz, 1H), 5.51 (d,  $J = 2.7$  Hz, 1H), 4.64 (d,  $J = 3.7$  Hz, 1H), 4.35 (tt,  $J = 7.9, 4.0$  Hz, 2H), 4.19 – 4.03 (m, 2H), 1.56 (s, 3H), 1.42 (s, 3H), 1.32 (s, 3H), 1.27 (s, 3H).

### 1,2:5,6-Di-*O*-isopropylidene-3-*O*-benzyl- $\alpha$ -D-glucofuranose **25**

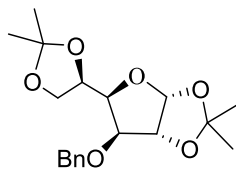

1,2:5,6-Di-*O*-isopropylidene-3-*O*-benzyl- $\alpha$ -D-glucofuranose **25** was synthesized as previously reported.<sup>1</sup> <sup>1</sup>H NMR (400 MHz, CDCl<sub>3</sub>)  $\delta$  7.37 – 7.22 (m, 5H), 5.89 (d,  $J$  = 3.7 Hz, 1H), 4.73 – 4.60 (m, 2H), 4.58 (d,  $J$  = 3.7 Hz, 1H), 4.37 (dt,  $J$  = 7.7, 6.0 Hz, 1H), 4.15 (dd,  $J$  = 7.7, 3.1 Hz, 1H), 4.10 (dd,  $J$  = 8.6, 6.2 Hz, 1H), 4.07 – 3.96 (m, 2H), 1.48 (s, 3H), 1.42 (s, 3H), 1.37 (s, 3H), 1.30 (s, 3H).

#### Methyl 2,4,6-tri-*O*-acetyl-3-*O*-(*p*-methoxybenzyl)- $\beta$ -D-galactopyranoside **27**

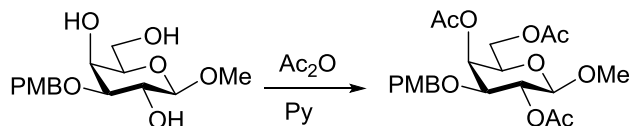

Acetic anhydride (450  $\mu$ L, 4.8 mmol) was added to a solution of methyl 3-*O*-(4-methoxybenzyl)- $\beta$ -D-galactopyranoside (300 mg, 0.95 mmol) in pyridine (2 mL) at 0 °C. The mixture was stirred at room temperature for 2 h, and then poured onto cold saturated NaHCO<sub>3</sub> solution. The aqueous phase was extracted with dichloromethane (3 $\times$ 10 mL). The combined organic phase was washed with saturated NaHCO<sub>3</sub> solution (1 $\times$ 15 mL), dried with anhydrous MgSO<sub>4</sub>, and concentrated in vacuo. The residue was purified by silica gel flash chromatography to afford **27** as colorless oil (elution with ethyl acetate/petroleum ether = 1:4 (v/v); 387 mg, 92% yield). <sup>1</sup>H NMR (400 MHz, CDCl<sub>3</sub>)  $\delta$  7.19 (d,  $J$  = 8.6 Hz, 2H, Ar-H), 6.86 (d,  $J$  = 8.6 Hz, 2H, Ar-H), 5.49 (dd,  $J$  = 3.5, 1.2 Hz, 1H, H-4), 5.09 (dd,  $J$  = 10.0, 8.0 Hz, 1H, H-2), 4.62 (d,  $J$  = 11.9 Hz, 1H, PhCH<sub>2</sub>), 4.33 (d,  $J$  = 11.9 Hz, 1H, PhCH<sub>2</sub>), 4.29 (d,  $J$  = 8.1 Hz, 1H, H-1), 4.18 (d,  $J$  = 6.6 Hz, 2H, H-6), 3.81 (s, 4H, OMe, H-5), 3.52 (dd,  $J$  = 10.0, 3.4 Hz, 1H, H-2), 3.48 (s, 3H, OMe), 2.16 (s, 3H, OAc), 2.09 (s, 3H, OAc), 2.04 (s, 3H, OAc). <sup>13</sup>C NMR (100 MHz, CDCl<sub>3</sub>)  $\delta$  170.58, 170.46, 169.48, 159.34, 129.48, 129.46, 113.75, 102.03, 76.11, 70.92, 70.86, 70.37, 65.88, 61.99, 56.73, 55.28, 20.97, 20.87, 20.78. HRMS (ESI-TOF)  $m/z$  [M + Na]<sup>+</sup> calcd for [C<sub>12</sub>H<sub>28</sub>O<sub>10</sub>Na]<sup>+</sup>: 463.1580; found: 463.1598.

#### Methyl 2,4,6-tri-*O*-acetyl-3-*O*-(*p*-methoxybenzyl)- $\alpha$ -D-mannopyranoside **29**

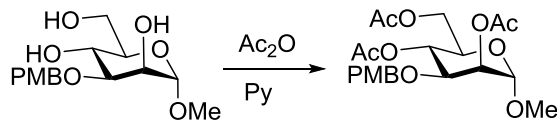

Methyl 2,4,6-tri-*O*-acetyl-3-*O*-(*p*-methoxybenzyl)- $\alpha$ -D-mannopyranoside **29** was synthesized according to the same procedure as the synthesis of **27**. [ $\alpha$ ]<sub>D</sub><sup>25</sup> = +13.8 (c 0.79, CH<sub>2</sub>Cl<sub>2</sub>). <sup>1</sup>H NMR (400 MHz, CDCl<sub>3</sub>)  $\delta$  7.18 (d,  $J$  = 8.6 Hz, 2H, Ar-H), 6.90 – 6.82 (m, 2H, Ar-H), 5.35 – 5.30 (m, 1H, H-2), 5.19 (t,  $J$  = 9.9 Hz, 1H, H-4), 4.73 (d,  $J$  = 1.8 Hz, 1H, H-1), 4.57 (d,  $J$  = 11.8 Hz, 1H, PhCH<sub>2</sub>), 4.34 (d,  $J$  = 11.8 Hz, 1H, PhCH<sub>2</sub>), 4.24 (dd,  $J$  = 12.2, 5.7 Hz, 1H, H-6a), 4.10 (dd,  $J$  = 12.2, 2.4 Hz, 1H, H-6b), 3.89–3.81 (m, 2H, H-3, H-5), 3.80 (s, 3H, OMe), 3.37 (s, 3H, OMe), 2.15 (s, 3H, OAc), 2.09 (s, 3H, OAc), 2.01 (s, 3H, OAc). <sup>13</sup>C NMR (100 MHz, CDCl<sub>3</sub>)  $\delta$  170.74, 170.34, 169.71, 159.27, 129.73, 129.38, 113.73, 98.85, 73.91, 70.95, 68.51, 68.11, 67.41, 62.79, 55.22, 21.00, 20.81, 20.73. HRMS (ESI-TOF)  $m/z$  [M + Na]<sup>+</sup> calcd for [C<sub>12</sub>H<sub>28</sub>O<sub>10</sub>Na]<sup>+</sup>: 463.1580; found: 463.1593.

#### Methyl 2-*O*-(*p*-methoxybenzyl)-3-*O*-benzyl-4,6-*O*-benzylidene- $\alpha$ -D-glucopyranoside **31**

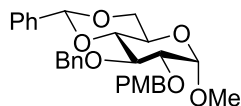

Methyl 2-*O*-(*p*-methoxybenzyl)-3-*O*-benzyl-4,6-*O*-benzylidene- $\alpha$ -D-glucopyranoside **31** was synthesized as previously reported.<sup>10</sup> <sup>1</sup>H NMR (400 MHz, CDCl<sub>3</sub>)  $\delta$  7.49 (dd,  $J$  = 7.2, 2.3 Hz, 2H), 7.42 – 7.22 (m, 10H), 6.86 (d,  $J$  = 8.2 Hz, 2H), 5.54 (s, 1H), 4.90 (d,  $J$  = 11.3 Hz, 1H), 4.87 – 4.75 (m, 2H), 4.63 (d,  $J$  = 11.9 Hz, 1H), 4.53 (d,  $J$  = 3.6 Hz, 1H), 4.26 (dd,  $J$  = 10.0, 4.7 Hz, 1H), 4.02 (t,  $J$  = 9.3 Hz, 1H), 3.80 (s, 4H), 3.70 (t,  $J$  = 10.2 Hz, 1H), 3.59 (t,  $J$  = 9.4 Hz, 1H), 3.53 (dd,  $J$  = 9.3, 3.7 Hz, 1H), 3.39 (s, 3H).

#### Methyl 2-*O*-(*p*-methoxybenzyl)-3-*O*-(*tert*-butyl-dimethylsilyl)-4,6-*O*-benzylidene- $\alpha$ -D-glucopyranoside **33**

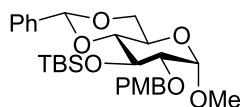

Methyl 3-*O*-(*tert*-butyl-dimethylsilyl)-4,6-*O*-benzylidene- $\alpha$ -D-glucopyranoside (200 mg, 0.5 mmol) was dissolved in DMF (2 mL) and the solution

was cooled to 0 °C. NaH (40 mg, 1.0 mmol) and *p*-methoxybenzyl chloride (102  $\mu$ L, 0.75 mmol) was added to the mixture slowly. The mixture was then warmed to room temperature and stirred for 3 h. MeOH (1.0 mL) was added to quench the reaction, and the mixture was stirred for a further 10 min. The reaction mixture was diluted with water and extracted with CH<sub>2</sub>Cl<sub>2</sub>. The organic layers were combined and washed with water and brine sequentially, dried over anhydrous MgSO<sub>4</sub>, concentrated in vacuo. The residue was purified by silica gel chromatography to give **33** (216 mg, 83%) as a colourless oil.  $[\alpha]_D^{12} = 75.3$  (c 0.15, CH<sub>2</sub>Cl<sub>2</sub>) <sup>1</sup>H NMR (600 MHz, CDCl<sub>3</sub>)  $\delta$  7.45 (dq,  $J = 5.0, 2.8$  Hz, 2H, Ar-H), 7.38 – 7.22 (m, 5H, Ar-H), 6.89 – 6.82 (m, 2H, Ar-H), 5.44 (s, 1H, PhCH), 4.75 (d,  $J = 12.0$  Hz, 1H, PhCH<sub>2</sub>), 4.53 – 4.40 (m, 1H, PhCH<sub>2</sub>), 4.34 (d,  $J = 3.7$  Hz, 1H, H-1), 4.19 (dd,  $J = 9.9, 4.6$  Hz, 1H, H-6a), 4.05 (t,  $J = 9.0$  Hz, 1H, H-4), 3.78 (s, 3H), 3.73 (dt,  $J = 9.7, 5.0$  Hz, 1H, H-6b), 3.63 (t,  $J = 10.2$  Hz, 1H, H-5), 3.44 – 3.30 (m, 2H, H-2, H-3), 3.31 (s, 3H), 0.86 (s, 9H), 0.08 (s, 3H), -0.00 (s, 3H). <sup>13</sup>C NMR (100 MHz, CDCl<sub>3</sub>)  $\delta$  159.44, 137.37, 130.38, 129.92, 128.91, 128.08, 126.26, 113.84, 101.85, 99.40, 82.51, 79.86, 73.70, 71.48, 69.09, 62.13, 55.31, 55.27, 25.88, 18.31, -4.39, -4.49. HRMS (ESI-TOF)  $m/z$  [M + Na]<sup>+</sup> calcd for [C<sub>28</sub>H<sub>40</sub>O<sub>7</sub>SiNa]<sup>+</sup>: 539.2441; found: 539.2420.

### 1,2:5,6-Di-*O*-isopropylidene-3-*O*-(*p*-methoxybenzyl)- $\alpha$ -D-glucofuranose **35**

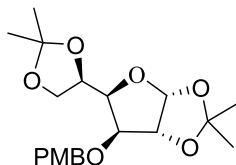

1,2:5,6-Di-*O*-isopropylidene-3-*O*-(*p*-methoxybenzyl)- $\alpha$ -D-glucofuranose **35** was prepared using literature procedure.<sup>11</sup> <sup>1</sup>H NMR (400 MHz, CDCl<sub>3</sub>)  $\delta$  7.33 – 7.19 (m, 3H), 6.87 (d,  $J = 8.5$  Hz, 2H), 5.88 (d,  $J = 3.7$  Hz, 1H), 4.70 – 4.47 (m, 3H), 4.34 (dt,  $J = 7.7, 6.1$  Hz, 1H), 4.23 – 4.03 (m, 2H), 4.00 (d,  $J = 2.8$  Hz, 1H), 3.80 (s, 3H), 1.49 (s, 3H), 1.43 (s, 3H), 1.38 (s, 3H), 1.31 (s, 3H).

### 1,2:3,4-Di-*O*-isopropylidene-6-*O*-(*p*-methoxybenzyl)- $\alpha$ -D-galactopyranose **37**

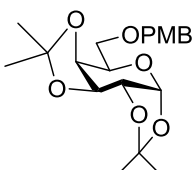

1,2:3,4-Di-*O*-isopropylidene-6-*O*-(*p*-methoxybenzyl)- $\alpha$ -D-galactopyranose **37** was synthesized according to the same procedure as the synthesis of **31**.<sup>12</sup> <sup>1</sup>H NMR (400 MHz, CDCl<sub>3</sub>)  $\delta$  7.27 (d,  $J = 8.5$  Hz, 2H), 6.87 (d,  $J = 8.4$  Hz, 2H), 5.54 (d,  $J = 5.0$  Hz, 1H), 4.66 – 4.44 (m, 3H), 4.29 (ddd,  $J = 18.2, 6.5, 2.1$  Hz, 2H), 3.98 (td,  $J = 6.4, 1.9$  Hz, 1H), 3.80 (s, 3H), 3.76 – 3.54 (m, 2H), 1.53 (s, 3H), 1.44 (s, 3H), 1.34 (s, 3H), 1.33 (s, 3H).

### Methyl 2,3-di-*O*-benzyl-4,6-*O*-benzylidene- $\alpha$ -D-mannopyranoside **39**

Methyl 2,3-di-*O*-benzyl-4,6-*O*-benzylidene- $\alpha$ -D-mannopyranoside **39** was synthesized according to the same procedure as the synthesis of **1a**.<sup>13</sup> <sup>1</sup>H NMR (600 MHz, CDCl<sub>3</sub>)  $\delta$  7.55 – 7.26 (m, 15H), 5.64 (s, 1H), 4.81 (dd,  $J = 12.2, 7.0$  Hz, 2H), 4.73 (d,  $J = 12.2$  Hz, 1H), 4.69 (d,  $J = 1.6$  Hz, 1H), 4.65 (d,  $J = 12.3$  Hz, 1H), 4.29 – 4.21 (m, 2H), 3.94 (dd,  $J = 10.0, 3.3$  Hz, 1H), 3.88 (t,  $J = 10.3$  Hz, 1H), 3.83 (dd,  $J = 3.3, 1.6$  Hz, 1H), 3.77 (dt,  $J = 9.9, 5.1$  Hz, 1H), 3.31 (s, 3H).

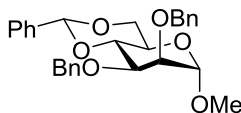

### Methyl 2,3-di-*O*-benzyl-4,6-*O*-benzylidene- $\beta$ -D-glucopyranoside **40**

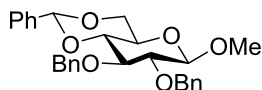

Methyl 2,3-di-*O*-benzyl-4,6-*O*-benzylidene- $\beta$ -D-glucopyranoside **40** was synthesized according to the same procedure as the synthesis of **1a**.<sup>14</sup> <sup>1</sup>H NMR (600 MHz, CDCl<sub>3</sub>)  $\delta$  7.57 – 7.23 (m, 15H), 5.57 (s, 1H), 4.89 (dd,  $J = 22.4, 10.9$  Hz, 2H), 4.78 (dd,  $J = 23.8, 11.1$  Hz, 2H), 4.42 (d,  $J = 7.7$  Hz, 1H), 4.39 – 4.33 (m, 1H), 3.77 (dt,  $J = 19.5, 9.4$  Hz, 2H), 3.68 (t,  $J = 9.3$  Hz, 1H), 3.58 (s, 3H), 3.43 (m, 2H).

### 3. References

1. Liu, Y.; Zeng, J.; Sun, J. C.; Cai, L.; Zhao, Y. Q.; Fang, J.; Hu, B.; Shu, P. H.; Meng, L. K.; Wan, Q. 1,4-Dithiothreitol Mediated Cleavage of Acetal and Ketal Type of Diol Protecting Groups. *Org. Chem. Front.* **2018**, *5*, 2427–2431.
2. Johnsson, R.; Ohlin, M.; Ellervik, U. Reductive Openings of Benzyldiene Acetals Revisited: A Mechanistic Scheme for Regio- and Stereoselectivity, *J. Org. Chem.* **2010**, *75*, 8003–8011.
3. Banerjee, A.; Senthilkumar, S.; Baskaran, S. Benzyldiene acetal protecting group as a carboxylic acid surrogate: Synthesis of functionalized uronic acids and sugar amino acids. *Chem. Eur. J.* **2016**, *22*, 902–906.
4. Zhang, Y.-J.; Dayoub, W.; Chen, G.-R.; Lemaire, M. TMDS as a Dual-Purpose Reductant in the Regioselective Ring Cleavage of Hexopyranosyl Acetals to Ethers. *Eur. J. Org. Chem.* **2012**, 1960–1966.
5. Seitz, A.; Wende, R. C.; Roesner, E.; Niedek, D.; Topp, C. Colgan, A. C. McGarrigle, E. M.; Schreiner, P. R. Site-Selective Acylation of Pyranosides with Oligopeptide Catalysts. *J. Org. Chem.* **2021**, *86*, 3907–3922.
6. van der Vorm, S.; Hansen, T.; Overkleeft, H. S.; van der Marel, G. A.; Codée, J. D. C. The Influence of Acceptor Nucleophilicity on the Glycosylation Reaction Mechanism. *Chem. Sci.* **2017**, *8*, 1867–1875.
7. Maki, Y.; Nomura, K.; Okamoto, R.; Izumi, M.; Mizutani, Y.; Kajihara, Y. Acceleration and Deceleration Factors on the Hydrolysis Reaction of 4,6-*O*-Benzyldiene Acetal Group. *J. Org. Chem.* **2020**, *85*, 15849–15856.
8. Emmadi, M.; Kulkarni, S. S. Synthesis of Rare Deoxy Amino Sugar Building Blocks Enabled the Total Synthesis of a Polysaccharide Repeating Unit Analogue from the LPS of *Psychrobacter cryohalolentis* K5<sup>T</sup>. *J. Org. Chem.* **2018**, *83*, 14323–14337.
9. Ye, D. F.; Liu, Z. Y.; Chen, H.; Sessler, J. L.; Lei, C. H. Cesium Carbonate Catalyzed Esterification of *N*-Benzyl-*N*-Bocamides under Ambient Conditions. *Org. Lett.* **2019**, *21*, 6888–6892.
10. Bauder, C. A convenient synthesis of orthogonally protected 2-deoxystreptamine (2-DOS) as an aminocyclitol scaffold for the development of novel aminoglycoside antibiotic derivatives against bacterial resistance. *Org. Biomol. Chem.* **2008**, *6*, 2952–2960.
11. Raunak, Babu, B. R.; Sørensen, M. D. Parmar, V. S.; Harrit, N. H.; Wengel, J. Oligodeoxynucleotides containing  $\alpha$ -L-ribo configured LNA-type C-aryl nucleotides. *Org. Biomol. Chem.* **2004**, *2*, 80–89.
12. Viuffa, A. H.; Heuckendorfa, M.; Jensen, H. H. *p*-Chlorobenzyl Ether: A *p*-Methoxybenzyl Ether in Disguise. *Org. Lett.* **2016**, *18*, 5773–5775.
13. Crich, D.; Banerjee, A.; Yao, Q.-J. Direct Chemical Synthesis of the  $\beta$ -d-Mannans: The  $\beta$ -(1→2) and  $\beta$ -(1→4) Series. *J. Am. Chem. Soc.* **2004**, *126*, *45*, 14930–14934.
14. Yoneda, Y.; Kawada, T.; Rosenau, T.; Kosma, P. Synthesis of methyl 4'-*O*-methyl-<sup>13</sup>C<sub>12</sub>- $\beta$ -D-cellobioside from <sup>13</sup>C<sub>6</sub>-D-glucose. Part 1: Reaction optimization and synthesis. *Carbohydr. Res.* **2005**, *340*, 2428–2435.

#### 4. Copies of NMR spectra

##### Methyl 2,3-di-*O*-benzyl-4,6-*O*-benzylidene- $\alpha$ -D-glucopyranoside **1a**

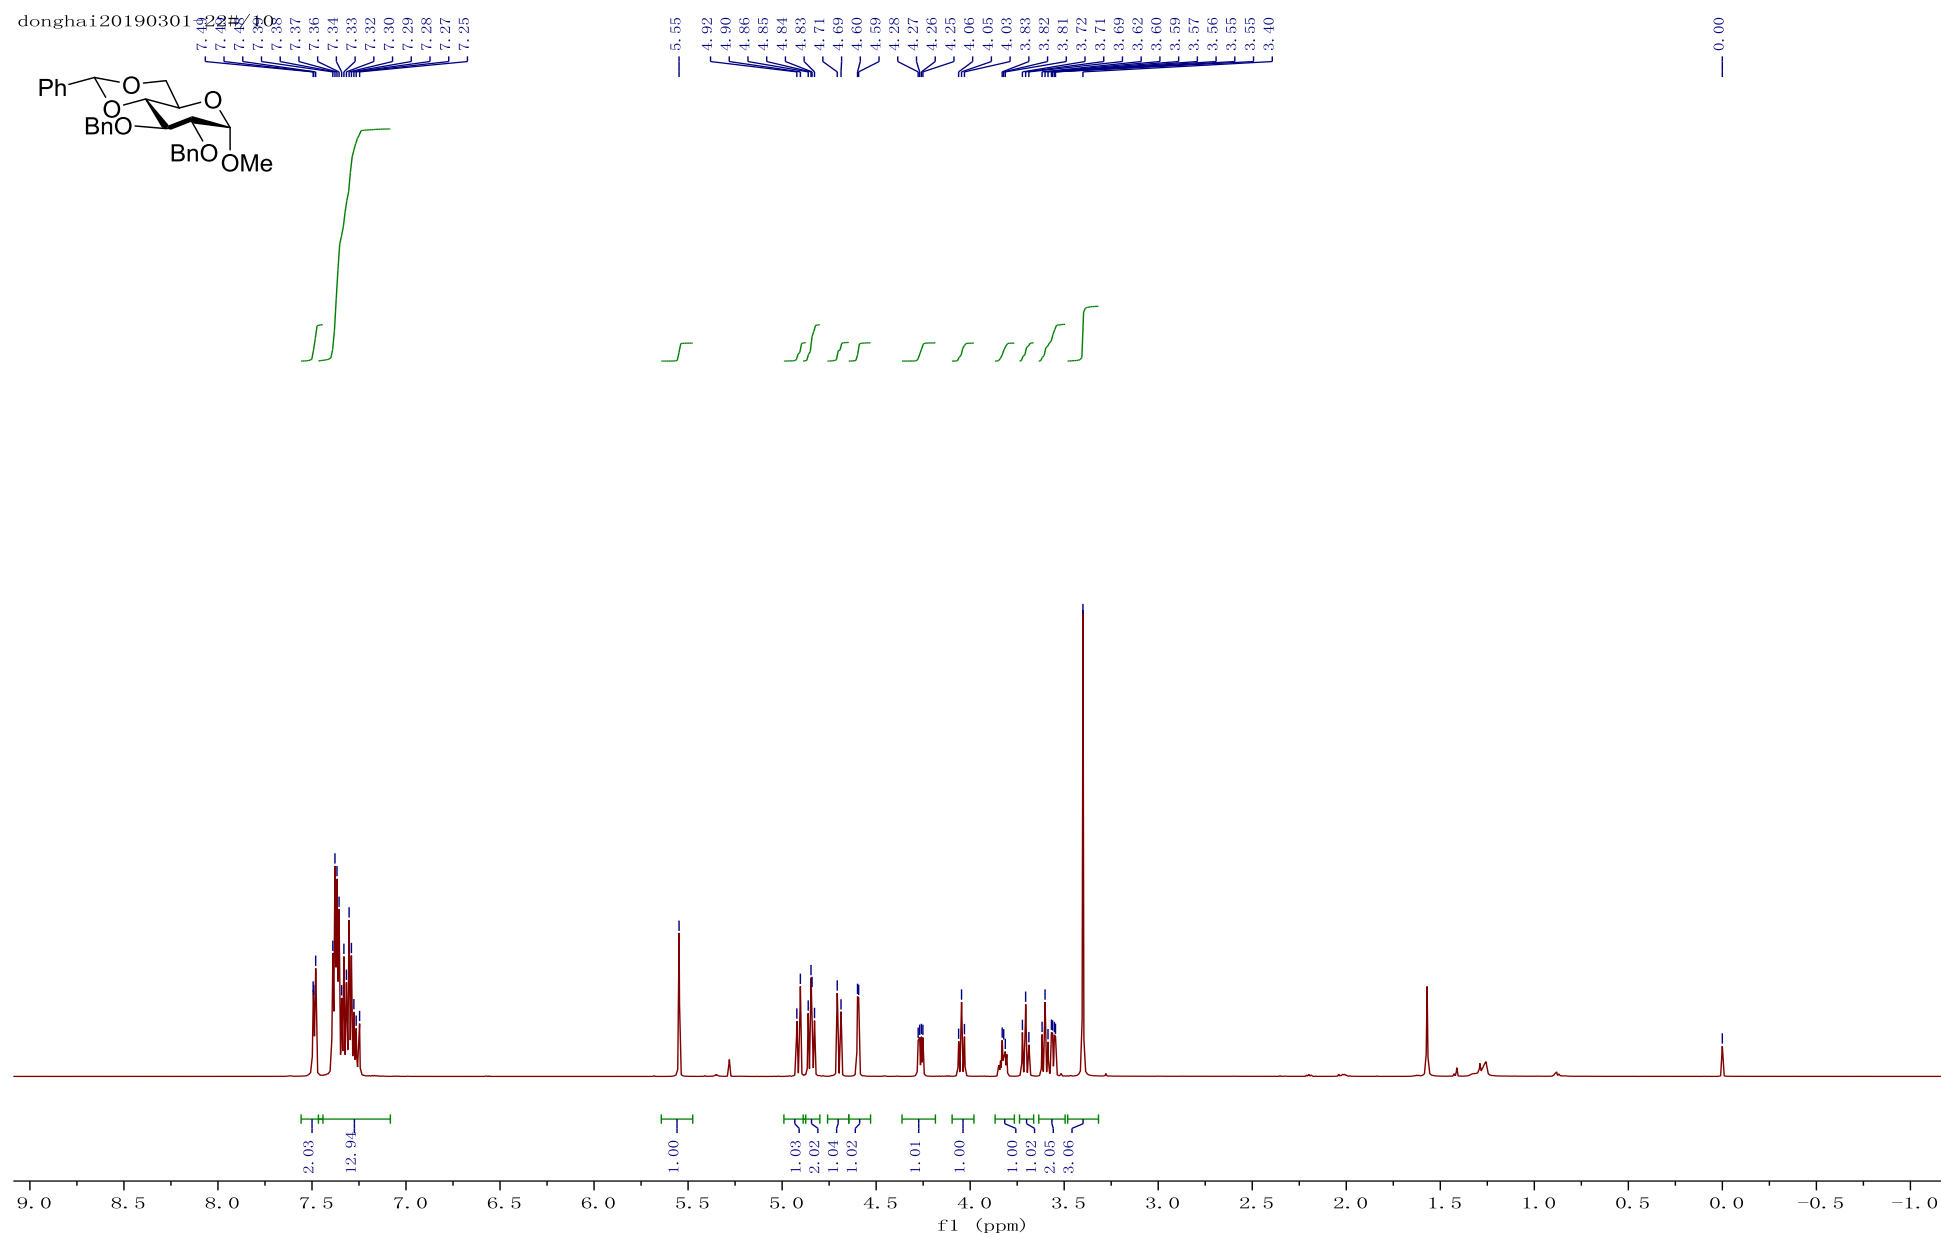



# Methyl 2,3-di-*O*-benzyl-4,6-*O*-(*p*-methoxybenzylidene)- $\alpha$ -D-glucopyranoside 1b

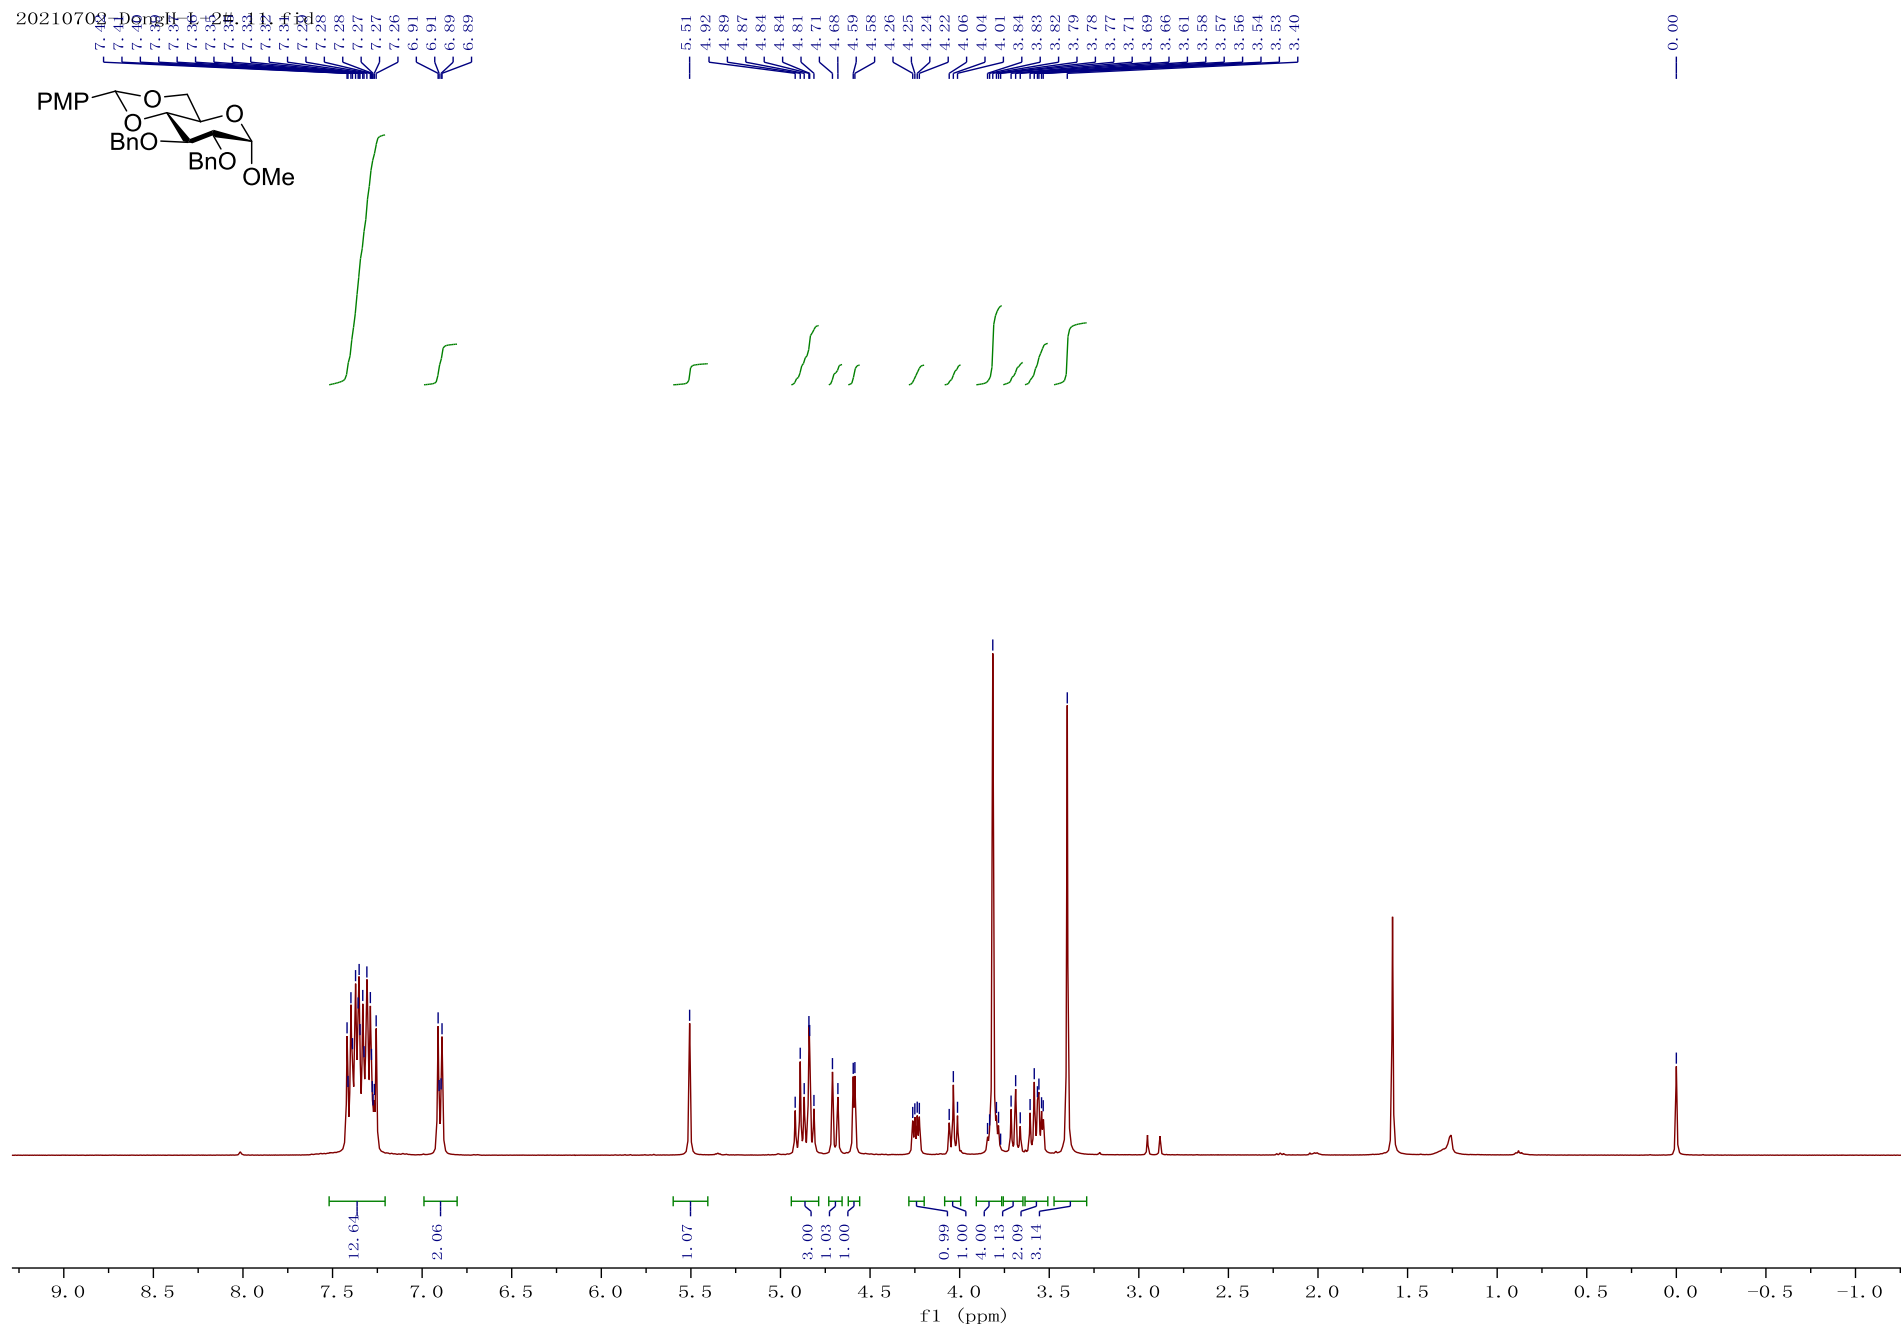

# Methyl 2,3-di-*O*-benzyl-4,6-*O*-(*p*-bromobenzylidene)- $\alpha$ -D-glucopyranoside 1c

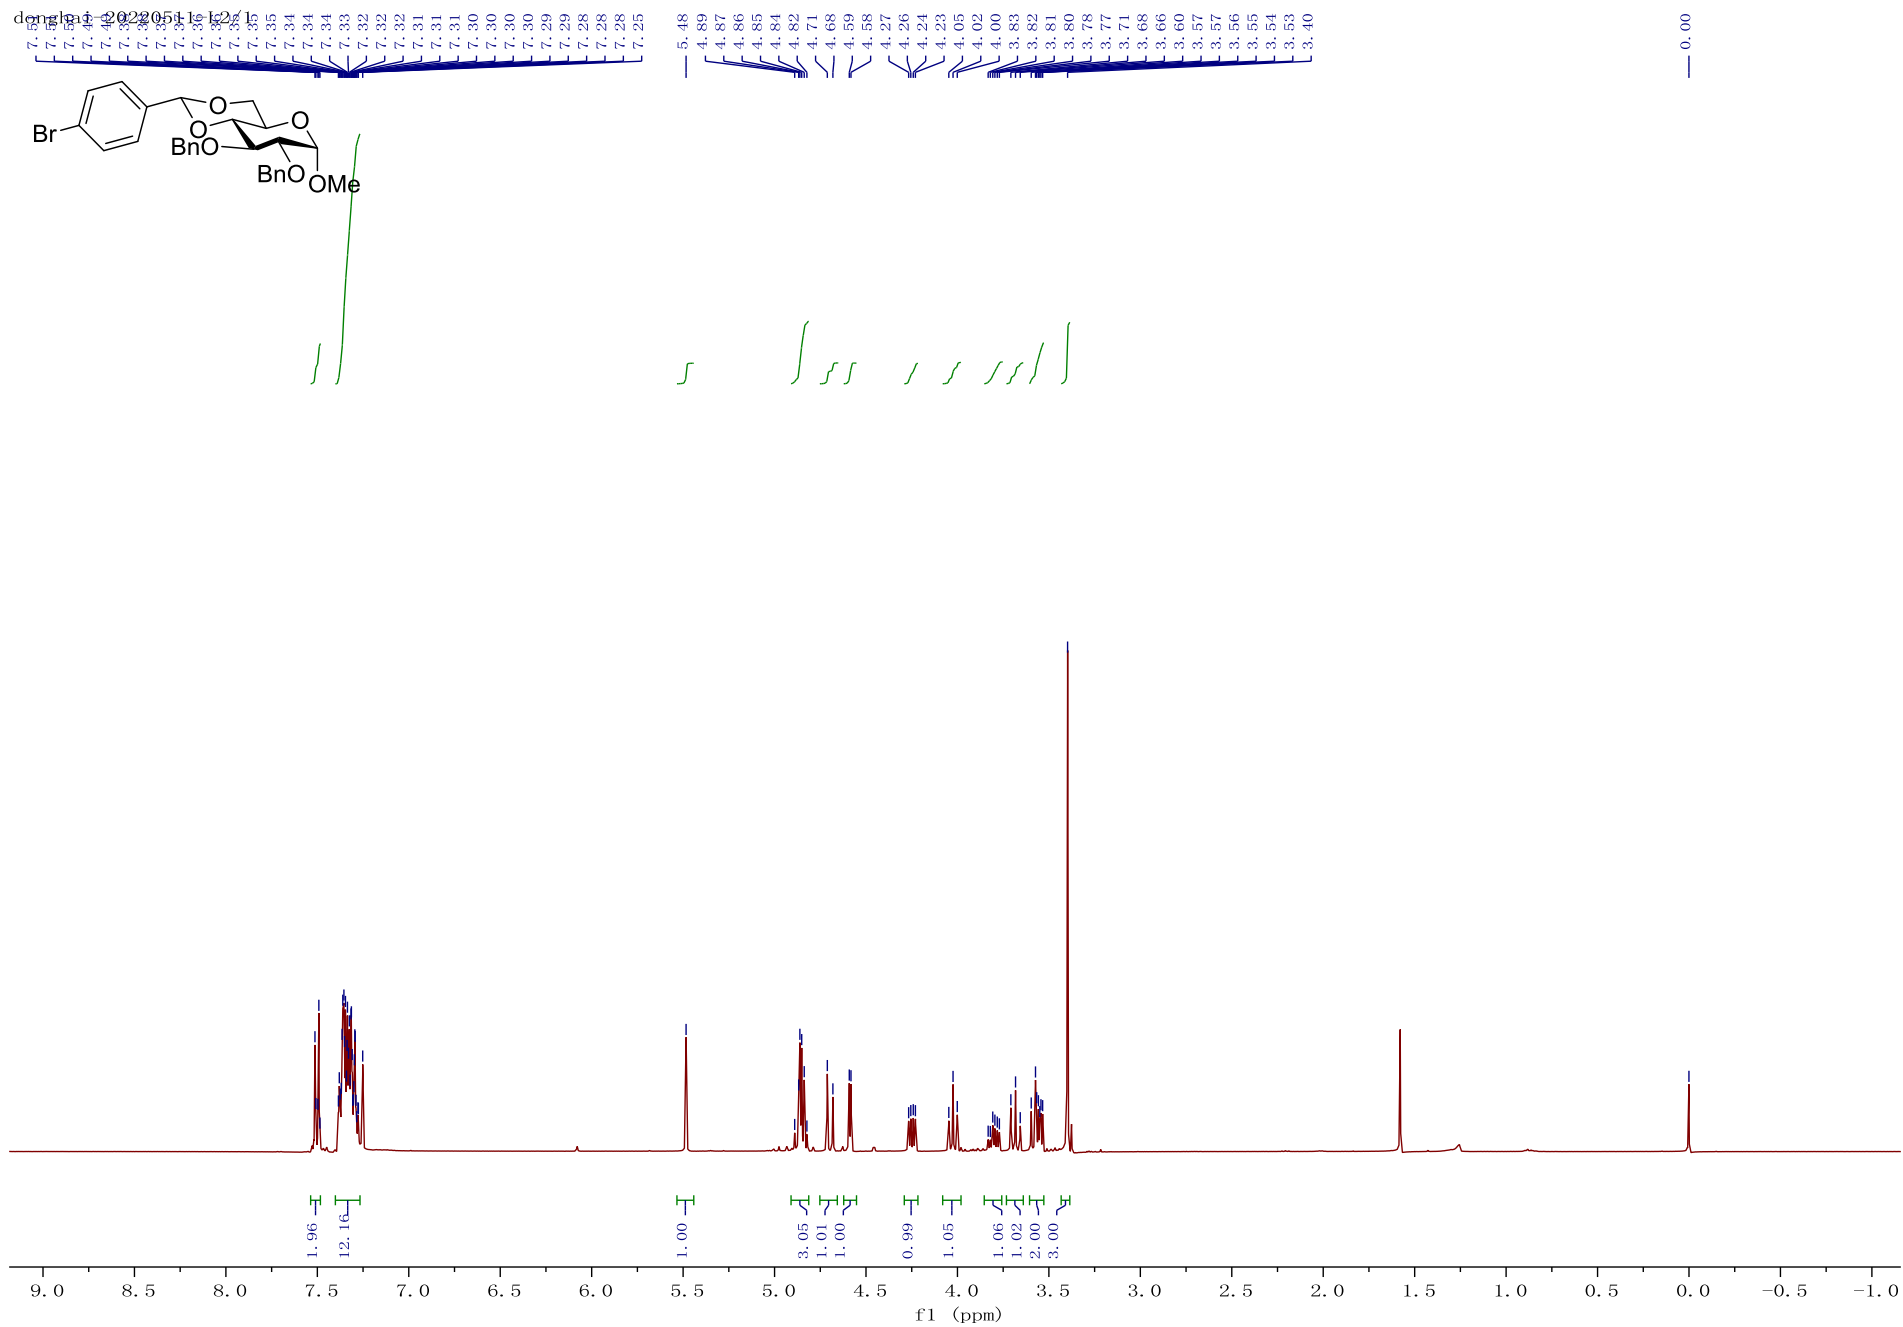

# Methyl 2,3-di-*O*-benzyl- $\alpha$ -D-glucopyranoside 2

donghai20190301-01#/108

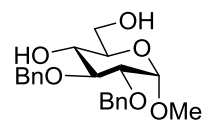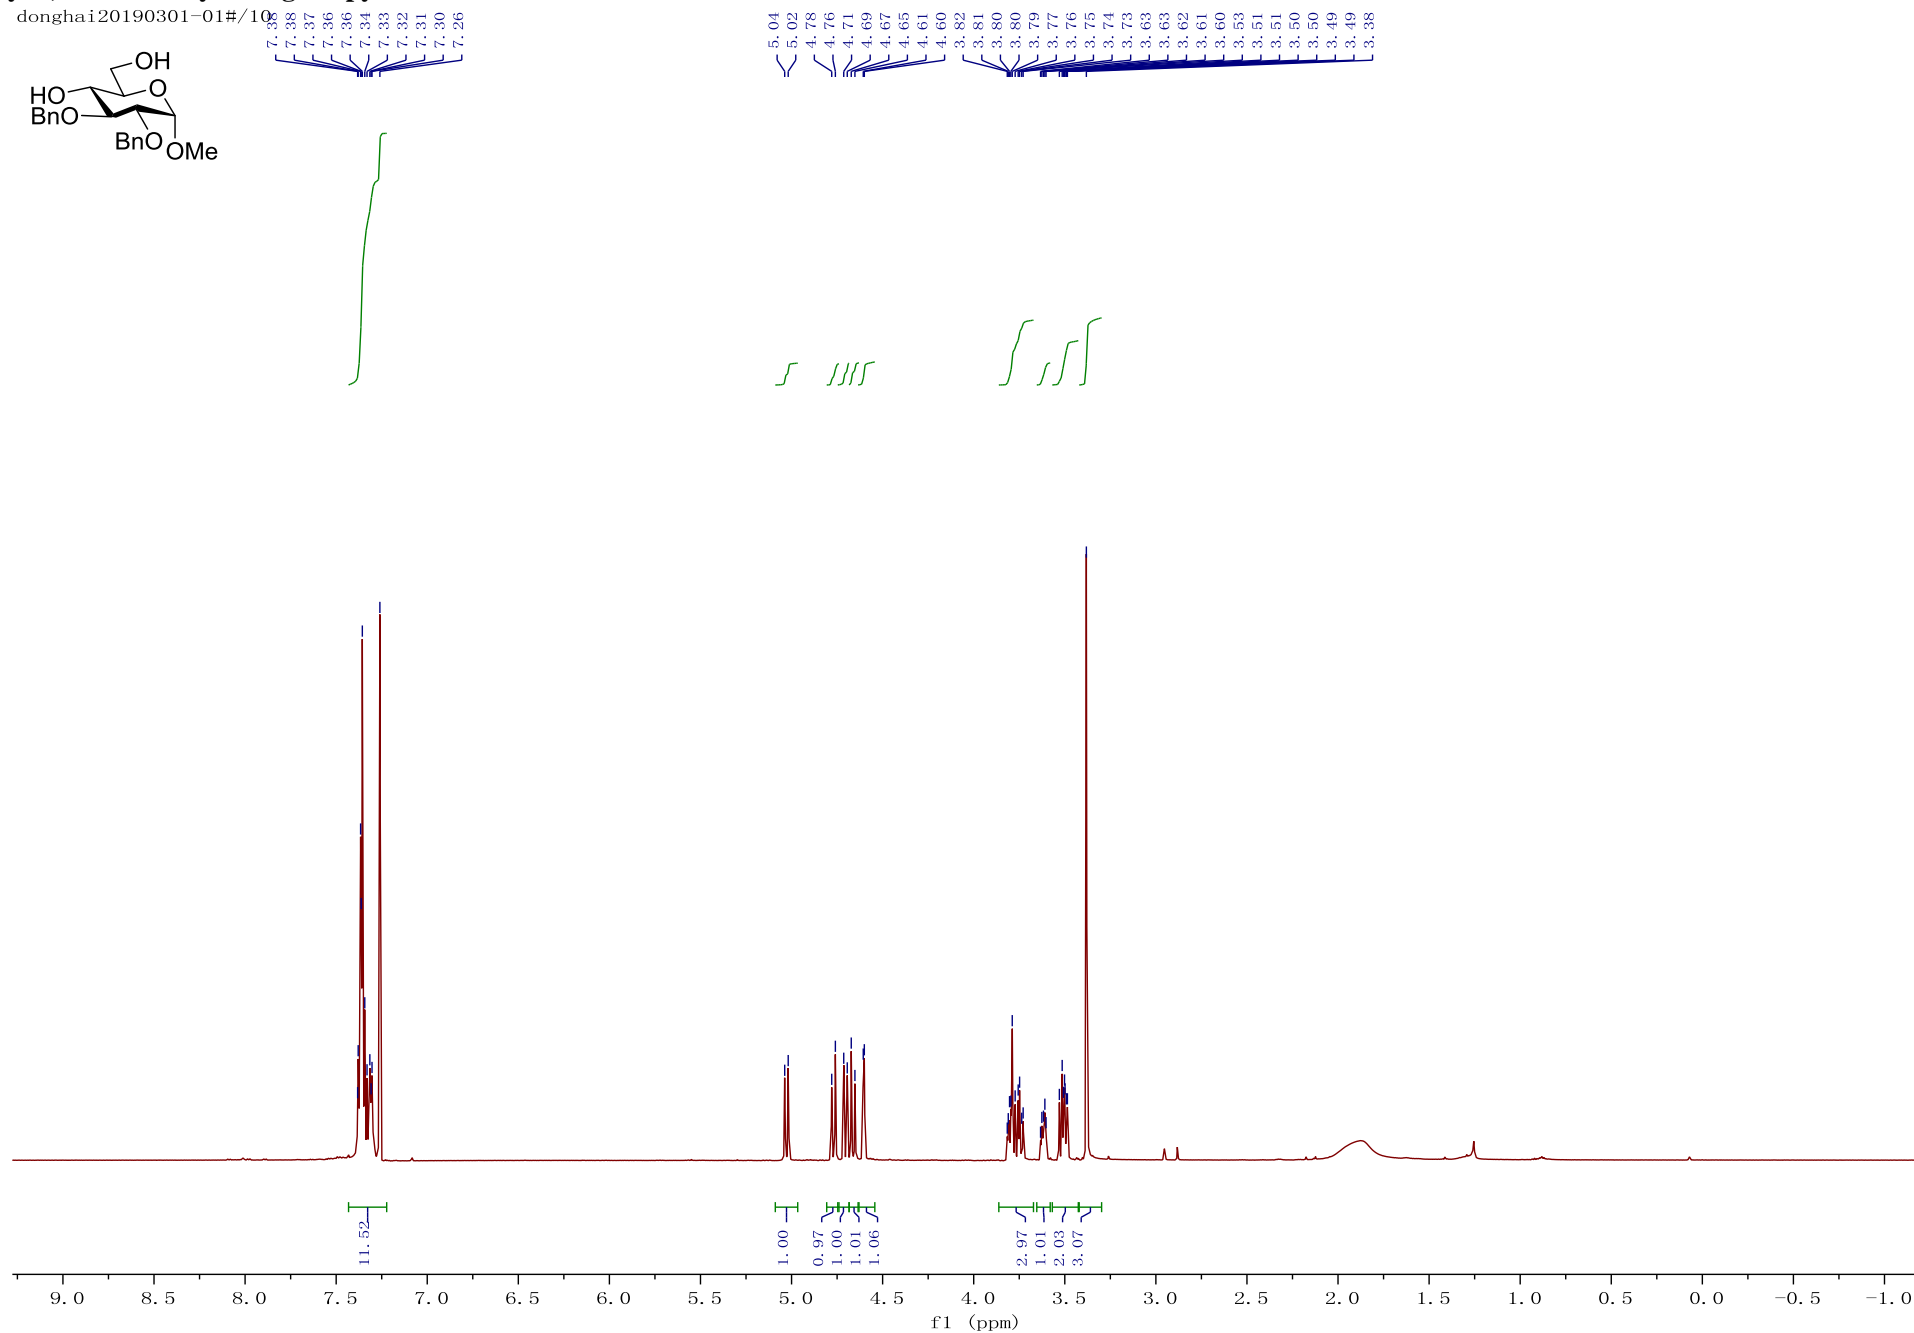

# Methyl 2,3-di-*O*-benzyl-4,6-*O*-acetyl- $\alpha$ -D-glucopyranoside 2a

donghai-20191108-01/1

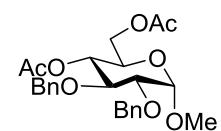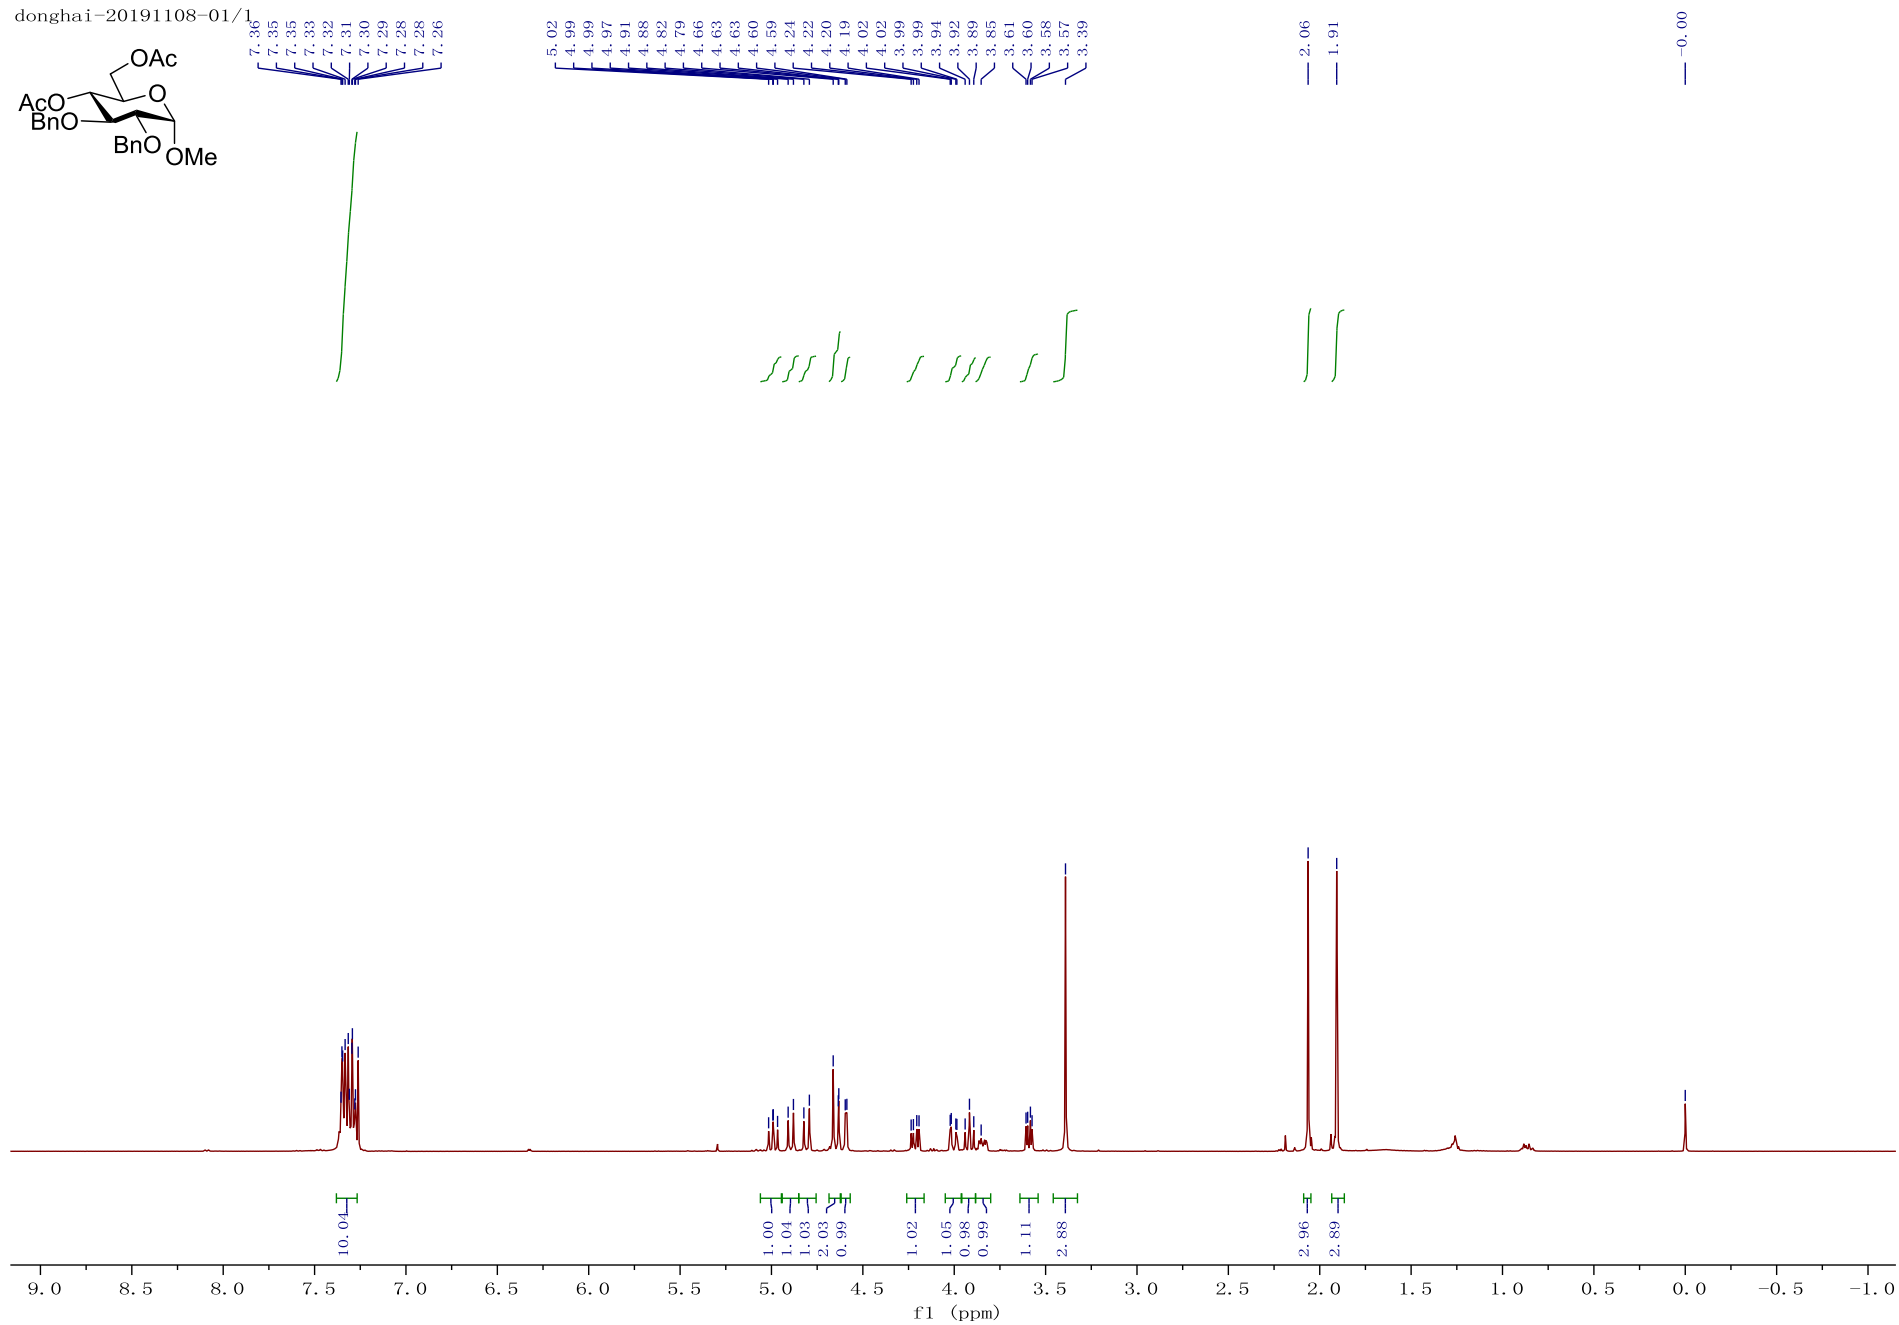

# Methyl 2,3-di-*O*-methyl-4,6-*O*-benzylidene- $\alpha$ -D-glucopyranoside 3

20210604-DongH-L-2#. 11. fid

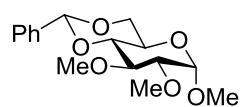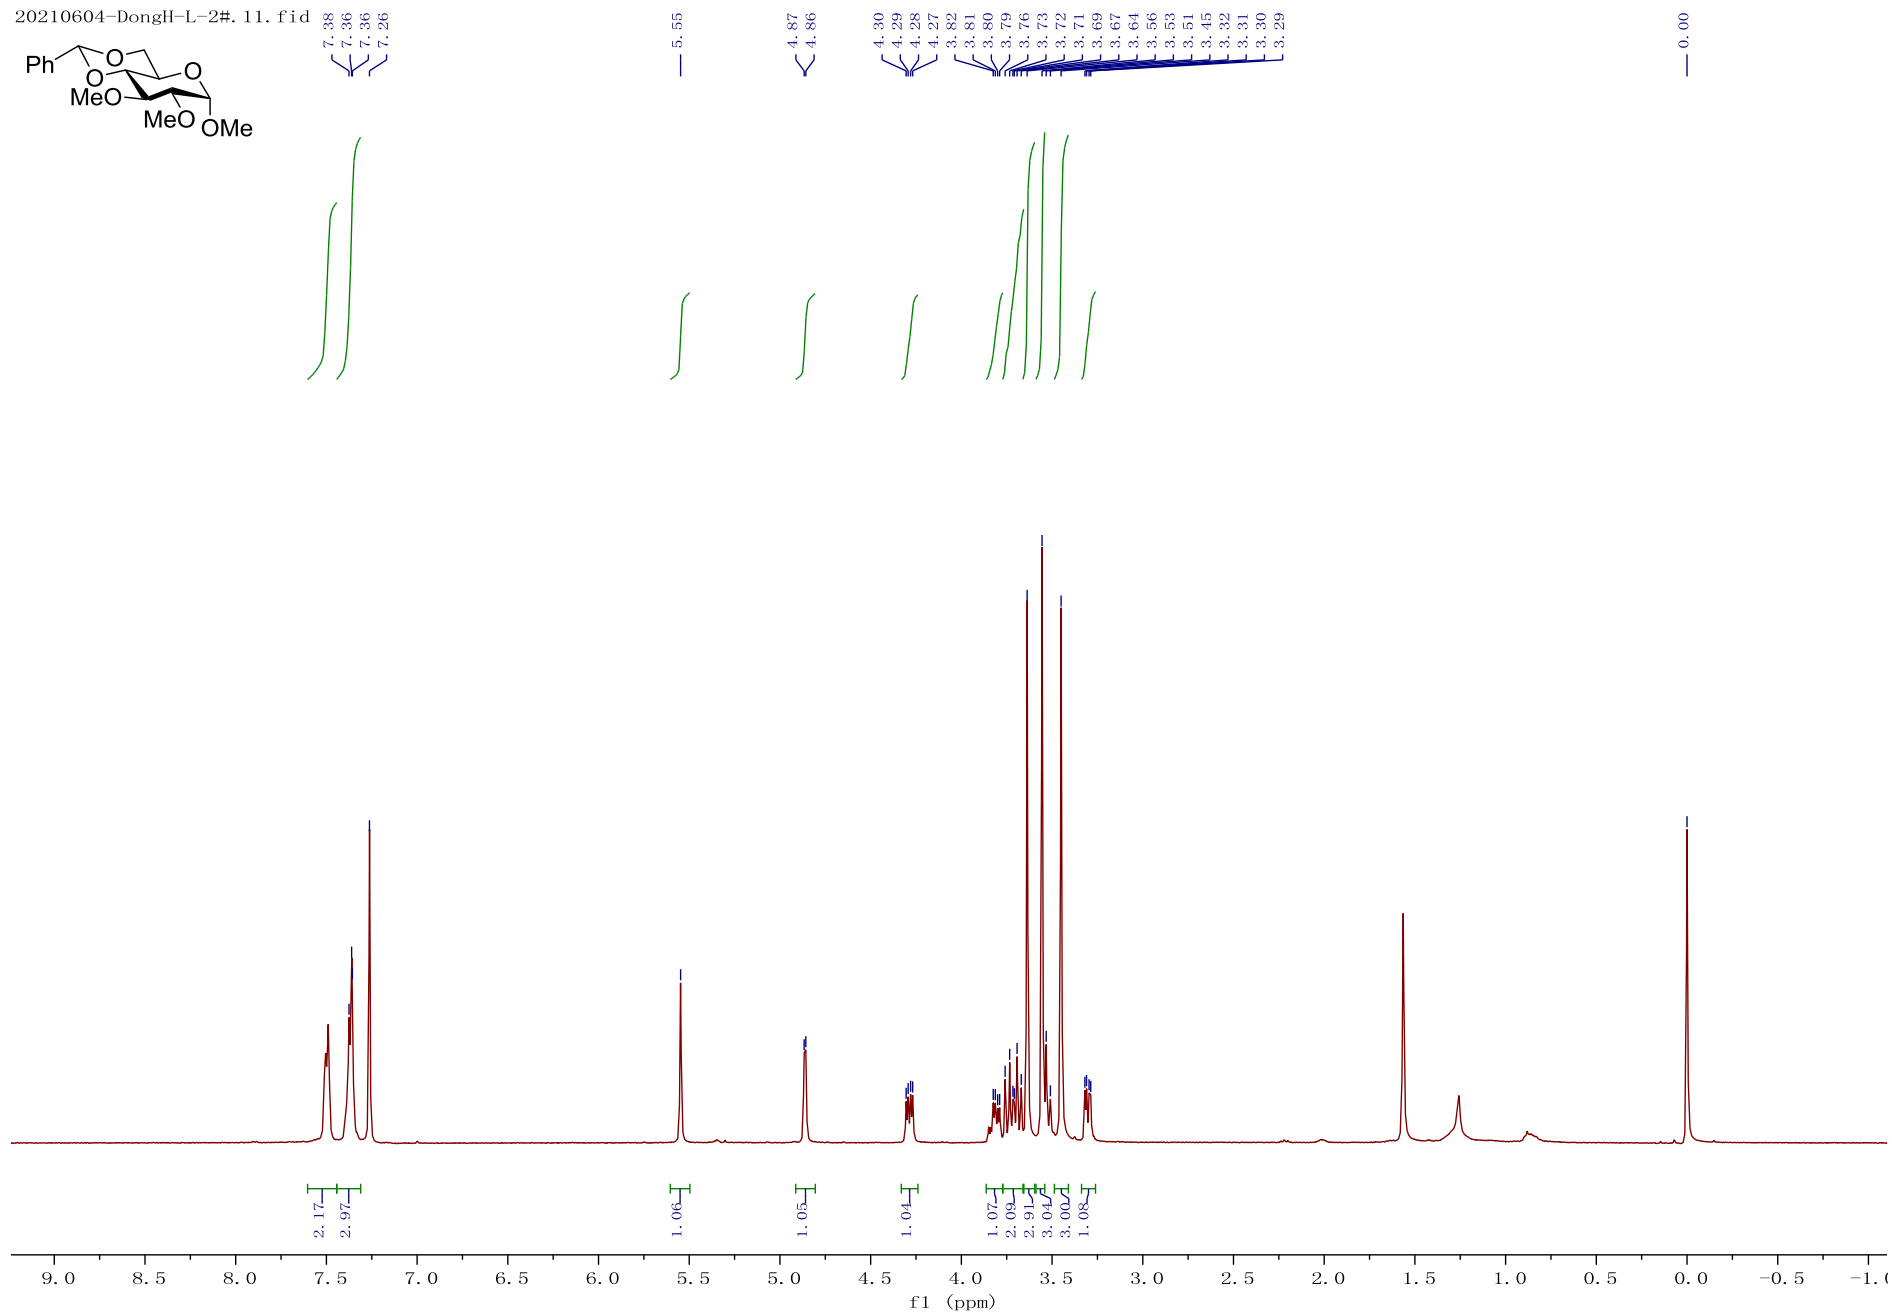

# Methyl-2,3-di-*O*-methyl- $\alpha$ -D-glucopyranoside 4

donghai-20190327-305/1

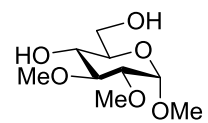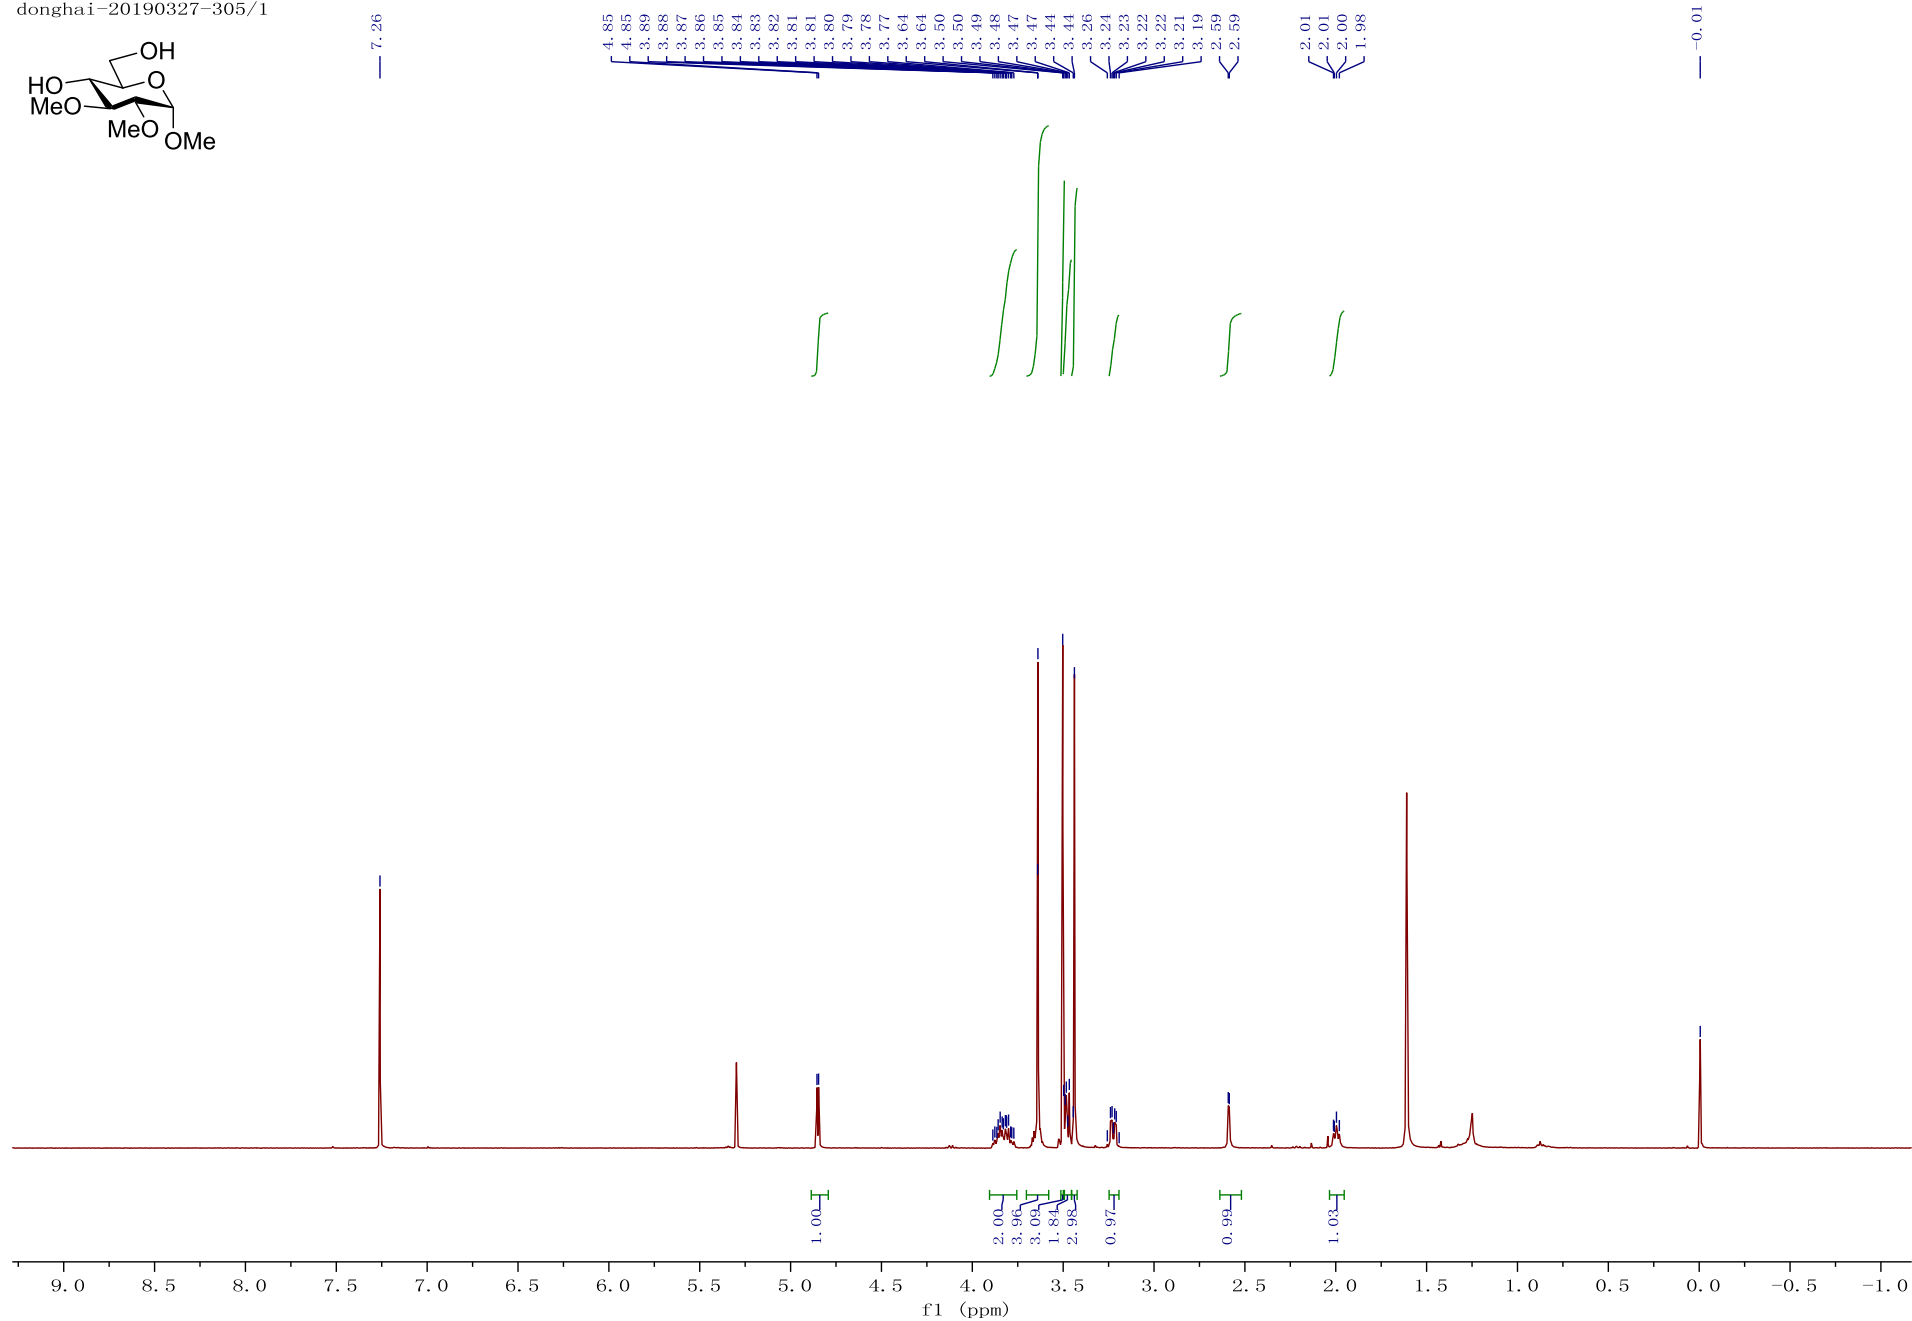

# Methyl 2,3-di-*O*-acetyl-4,6-*O*-benzylidene- $\alpha$ -D-glucopyranoside 5

20181115-DongH-5#, 11. f1

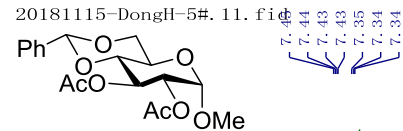

7.44  
7.43  
7.43  
7.35  
7.34  
7.34

5.61  
5.58  
5.56  
5.50

4.94  
4.94  
4.93  
4.92  
4.90  
4.89

4.32  
4.31  
4.29  
4.28

3.96  
3.94  
3.93  
3.92  
3.91  
3.89  
3.79  
3.77  
3.74  
3.67  
3.65  
3.62  
3.41

2.09  
2.05

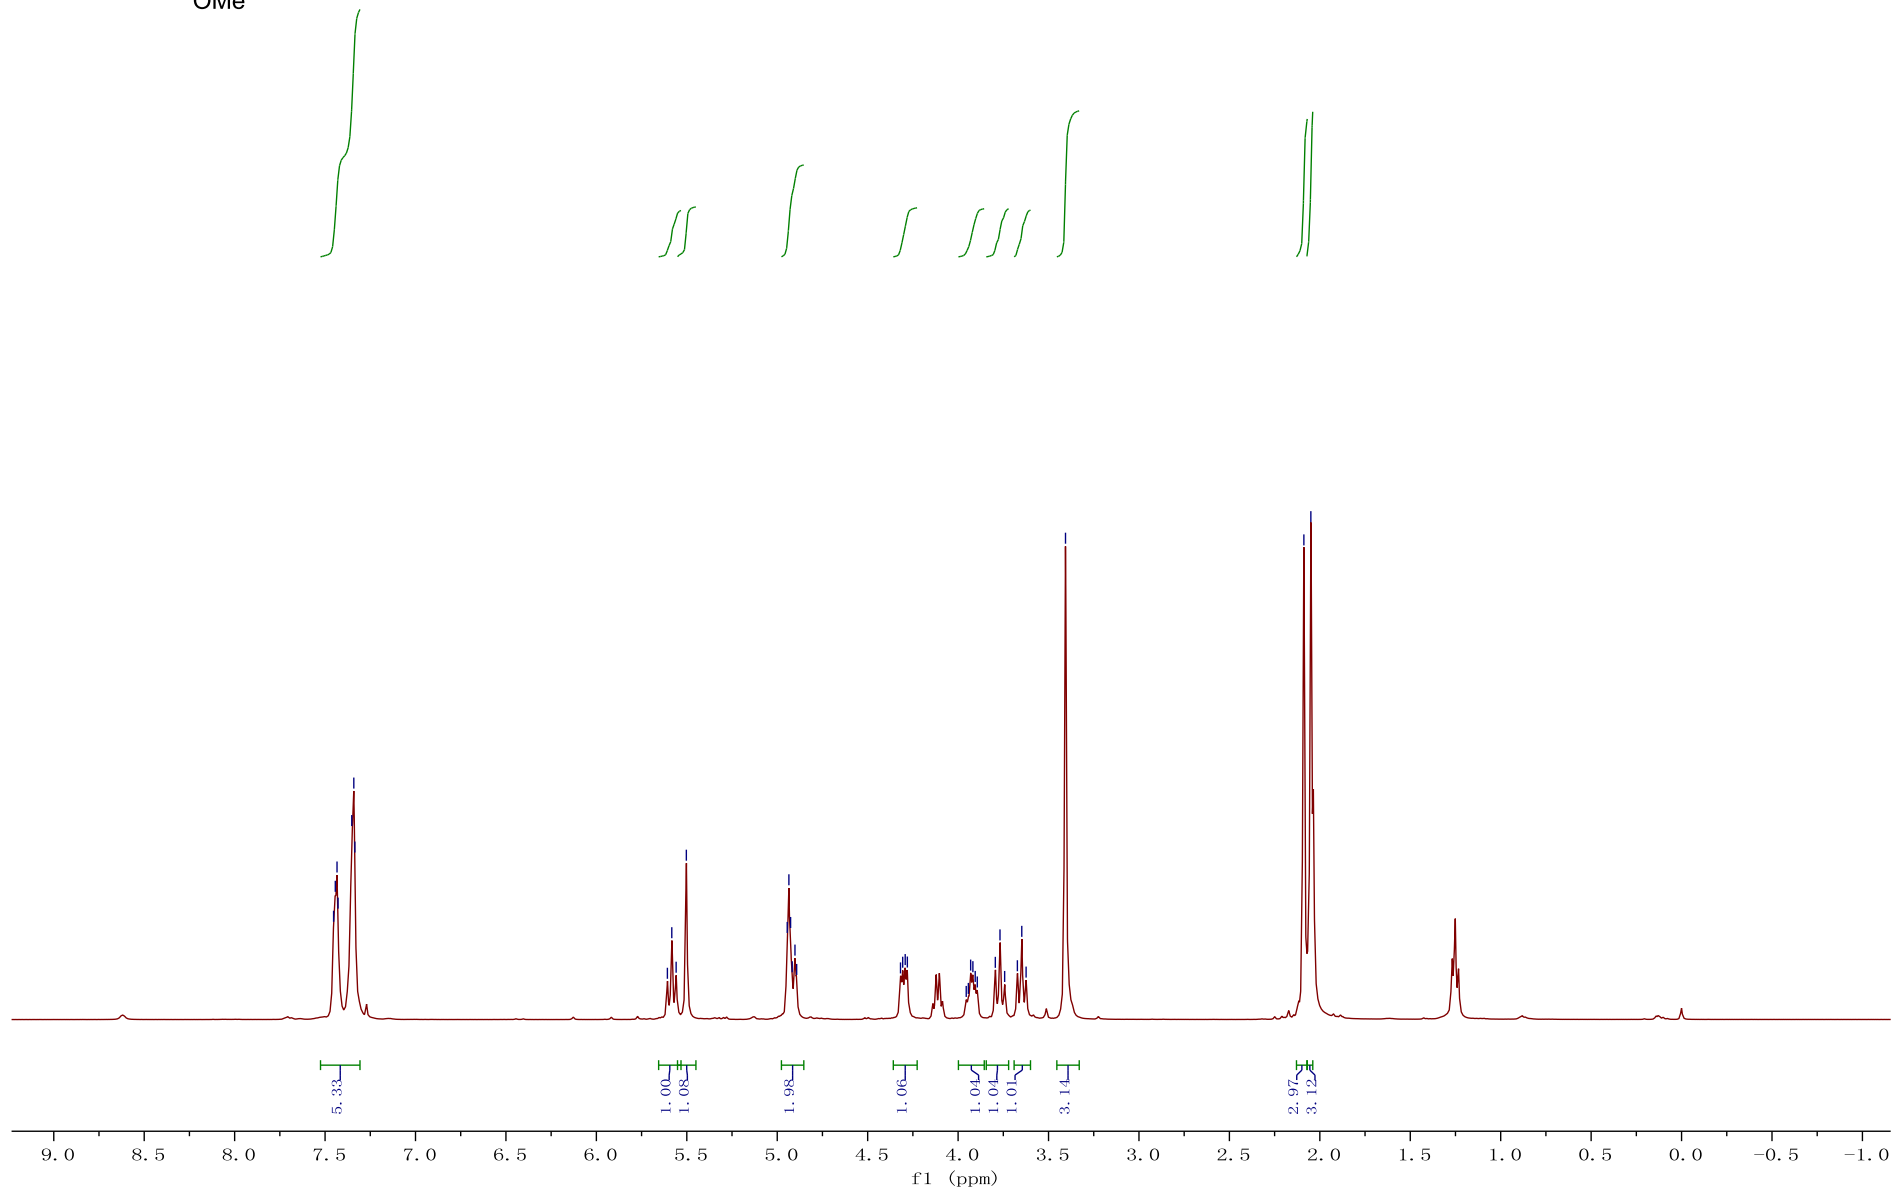

# Methyl 2,3-di-*O*-acetyl- $\alpha$ -D-glucopyranoside 6

2,3-OAc- $\alpha$ -OMe donghai-20191011 03/1

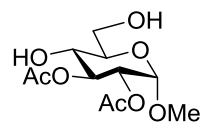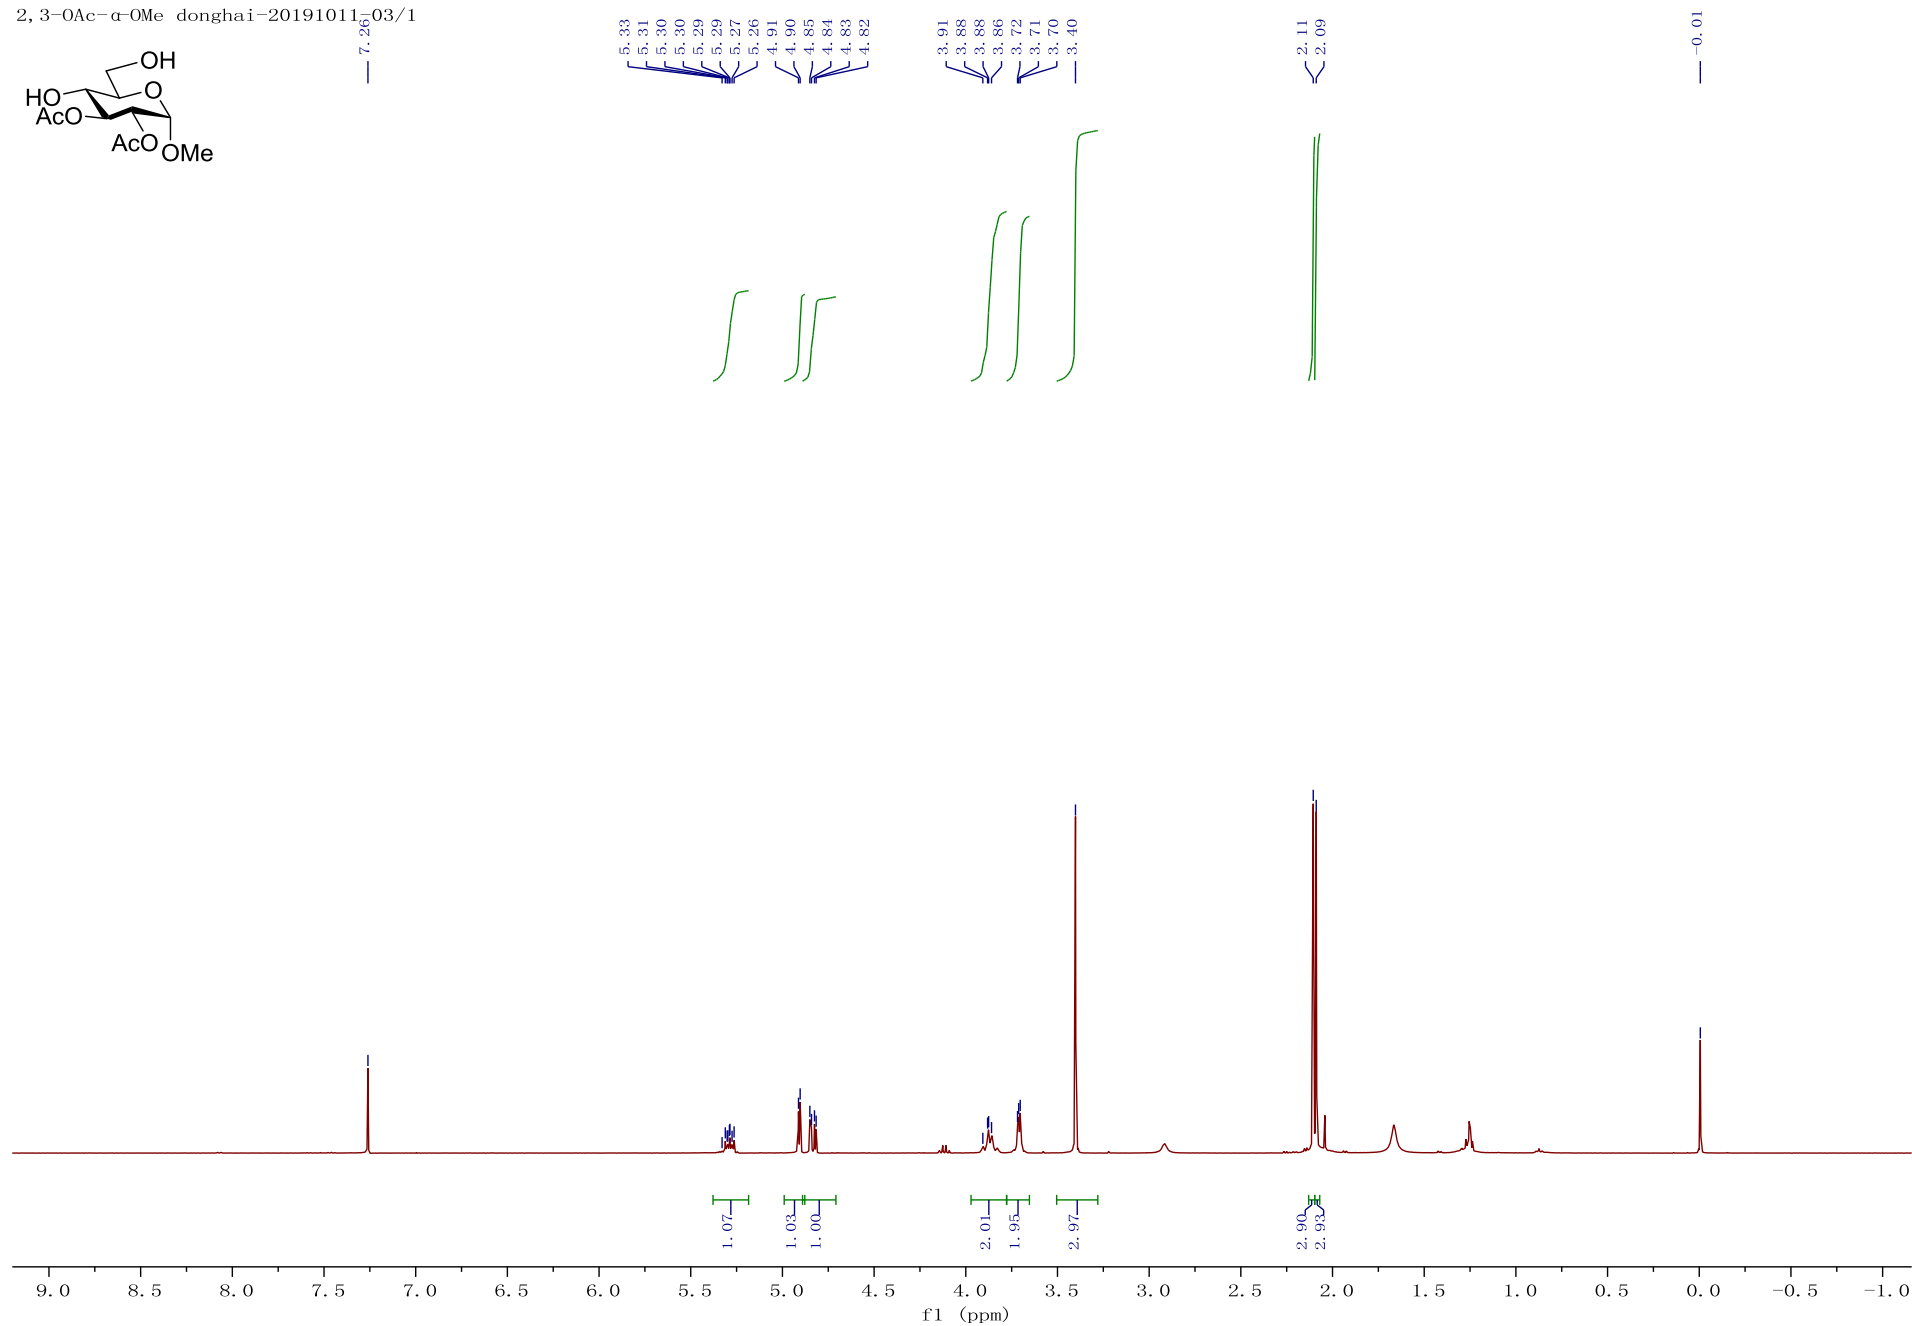



# Methyl 2,3-di-*O*-pivaloyl-4,6-*O*-benzylidene- $\alpha$ -D-glucopyranoside 7

20210603-DongH-L-2#. 11

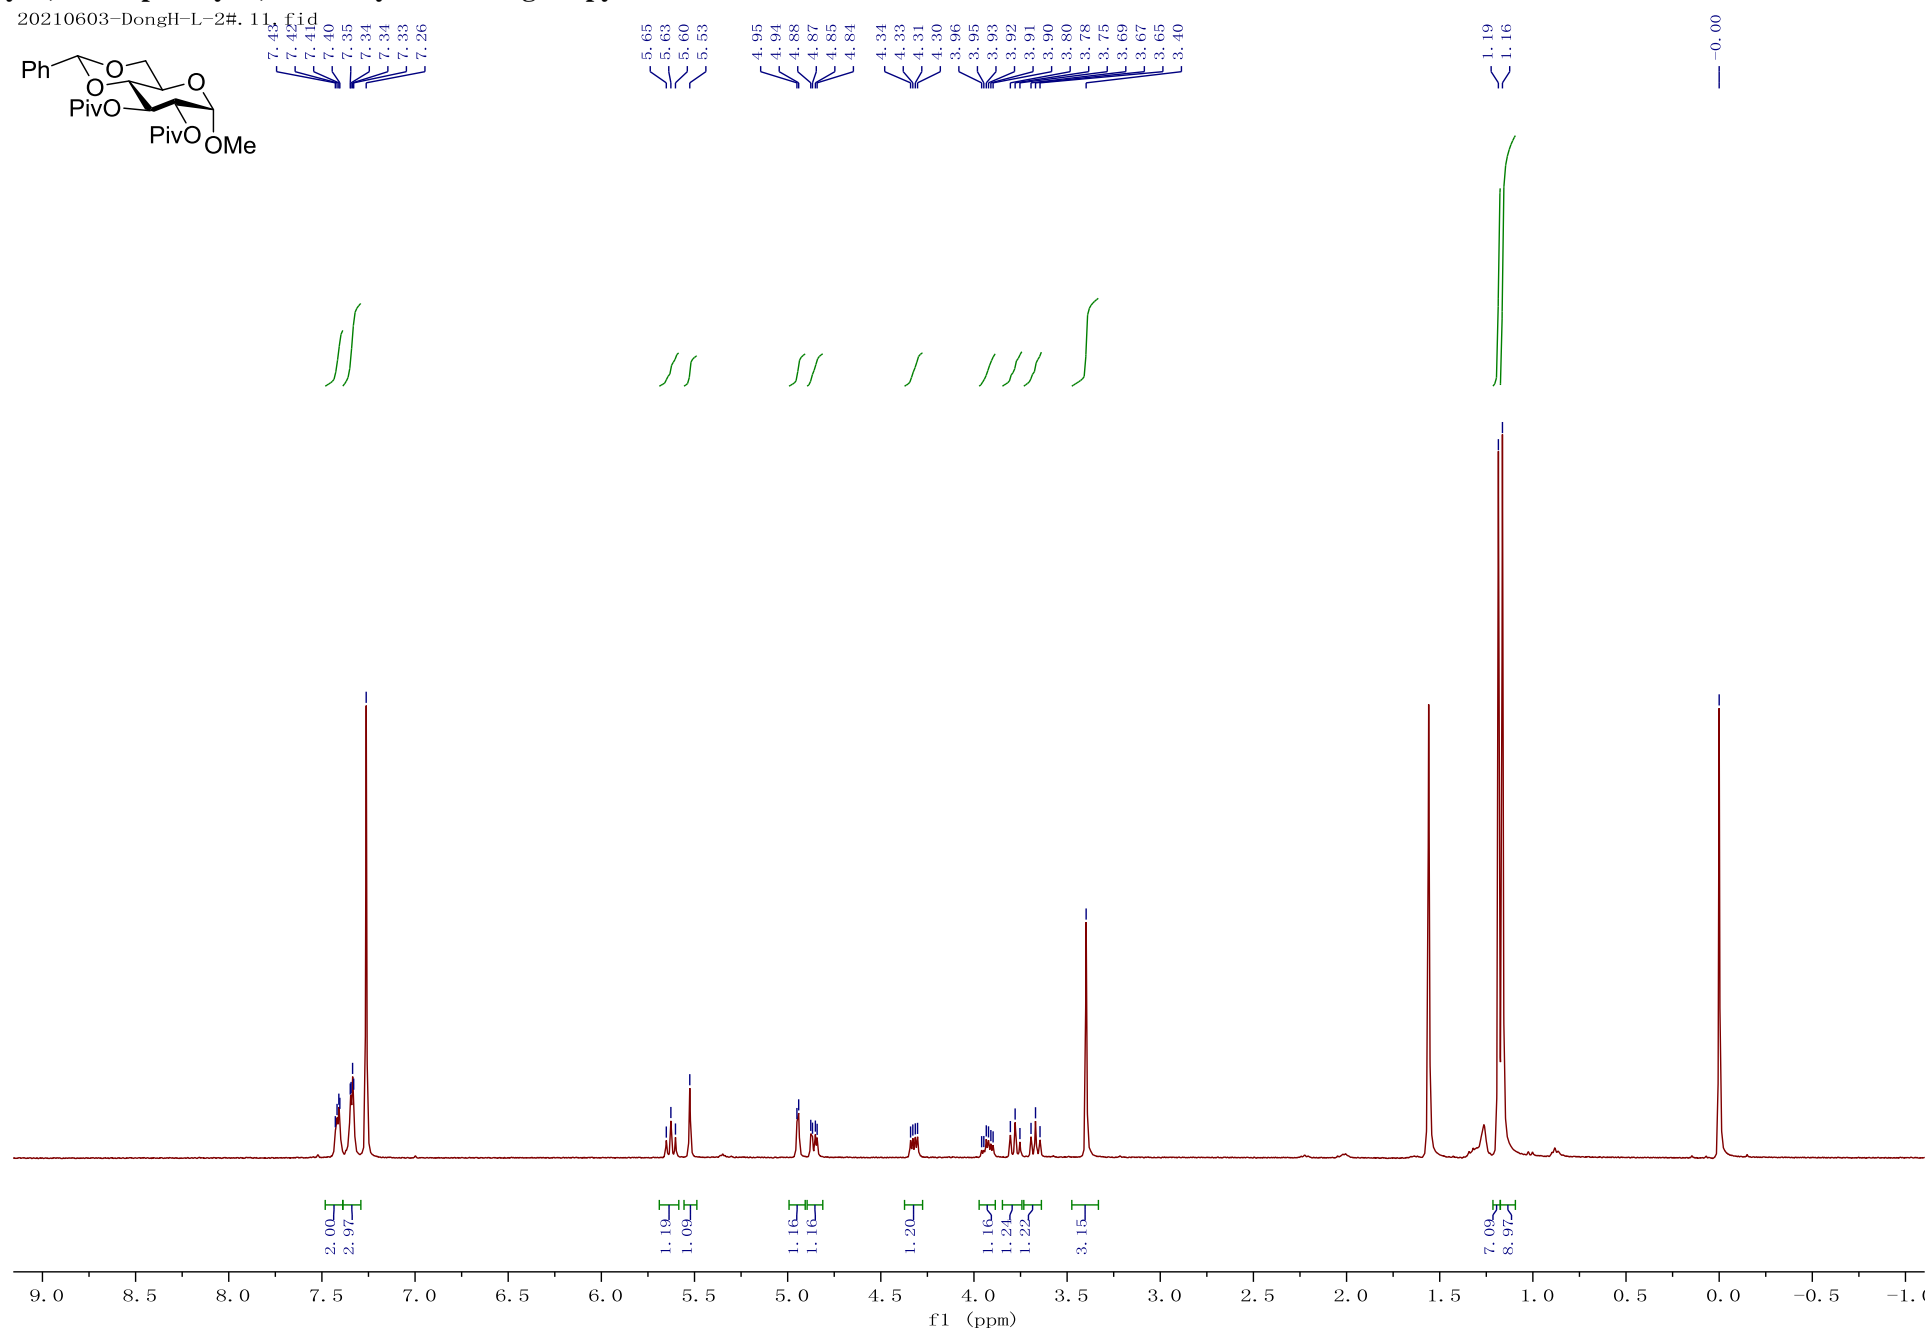

# Methyl 2,3-di-*O*-pivaloyl- $\alpha$ -D-glucopyranoside 8

20220116-DongH-L-1-0114#, 11. fid

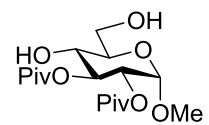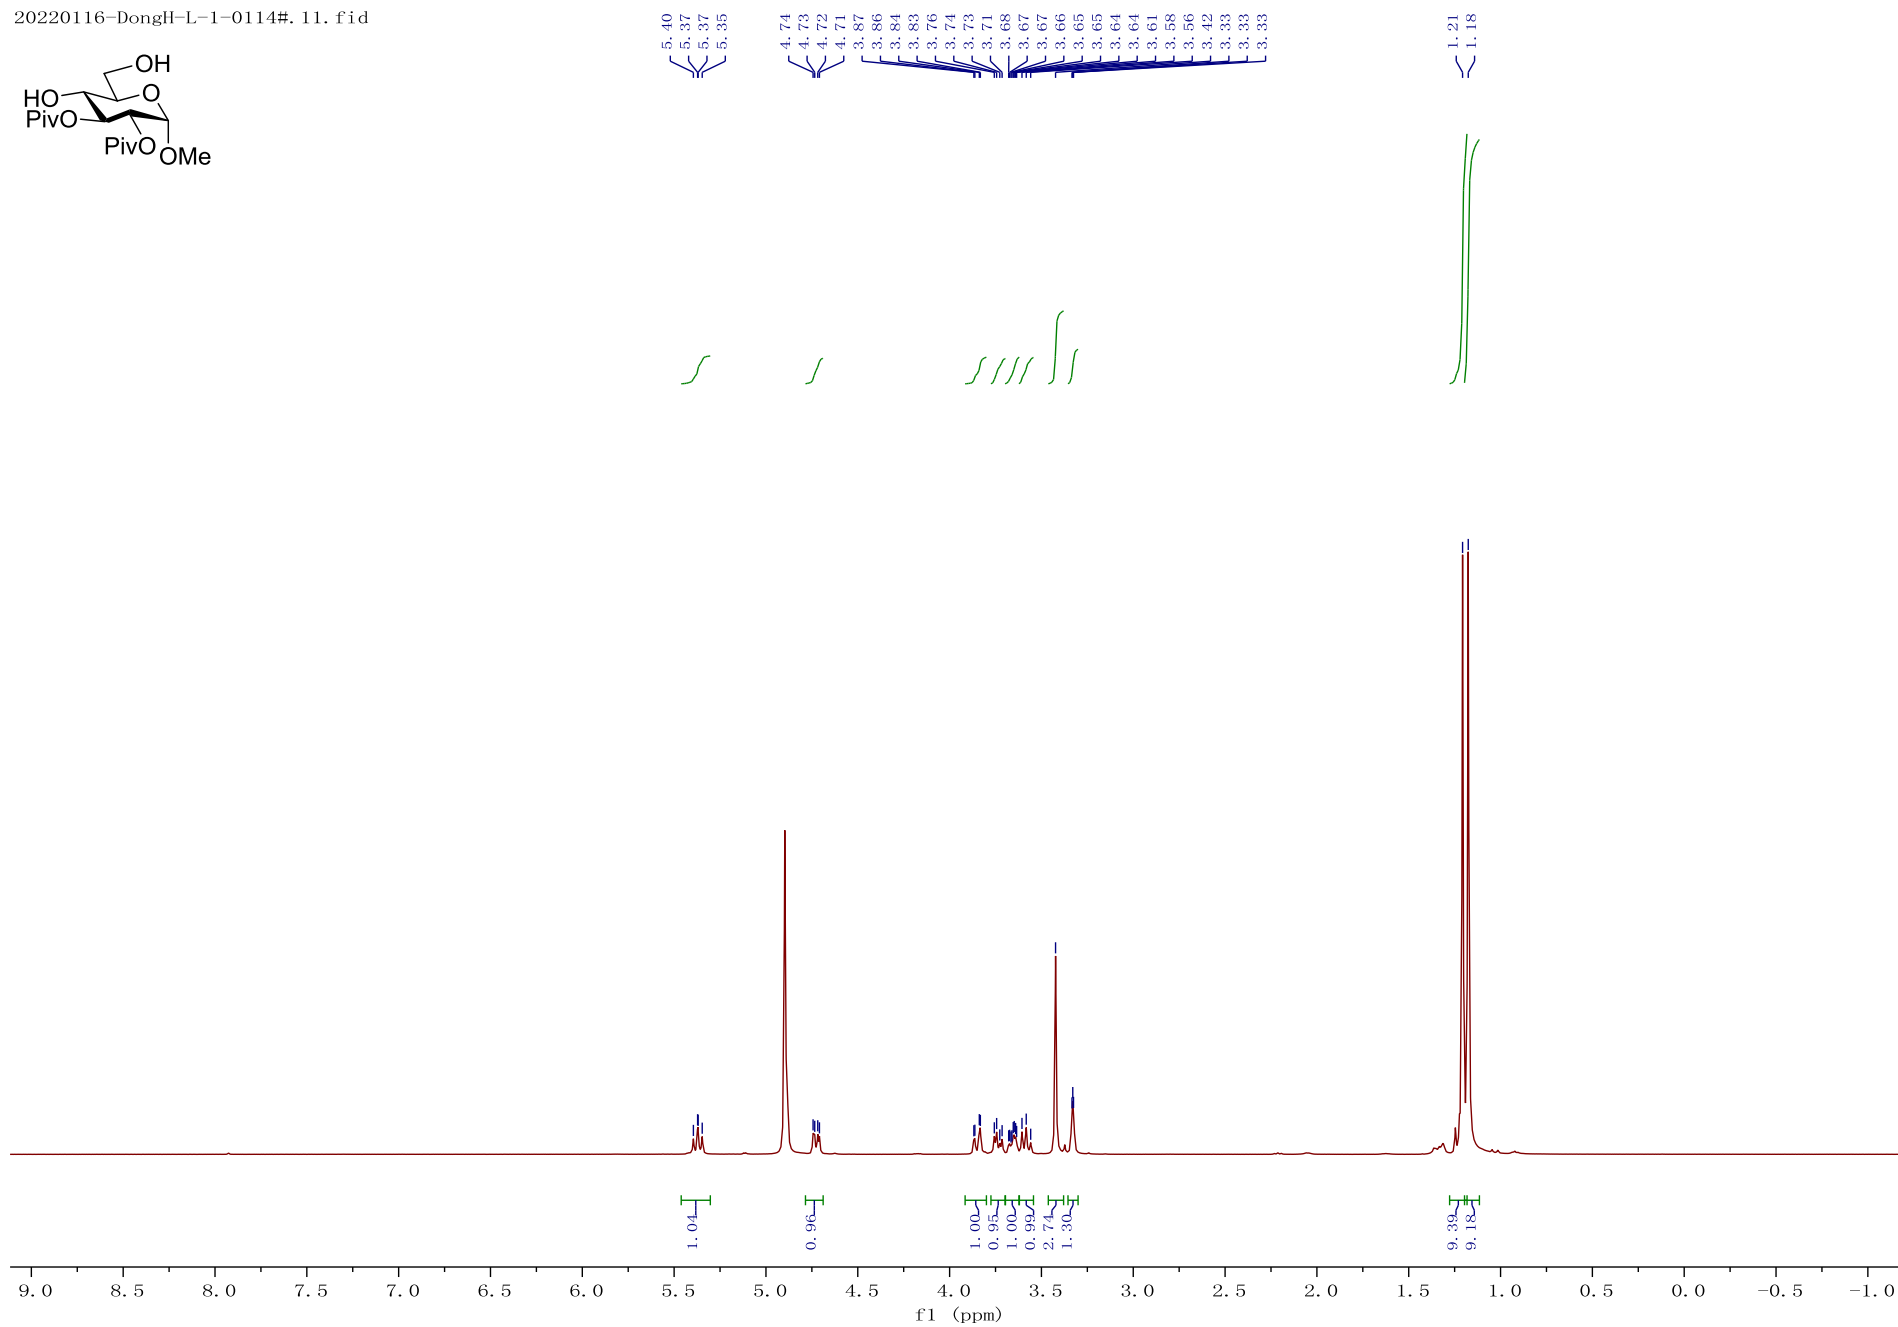

# Methyl 2,3-di-*O*-benzoyl-4,6-*O*-benzylidene- $\beta$ -D-glucopyranoside **9**

20181115-DongH-1#

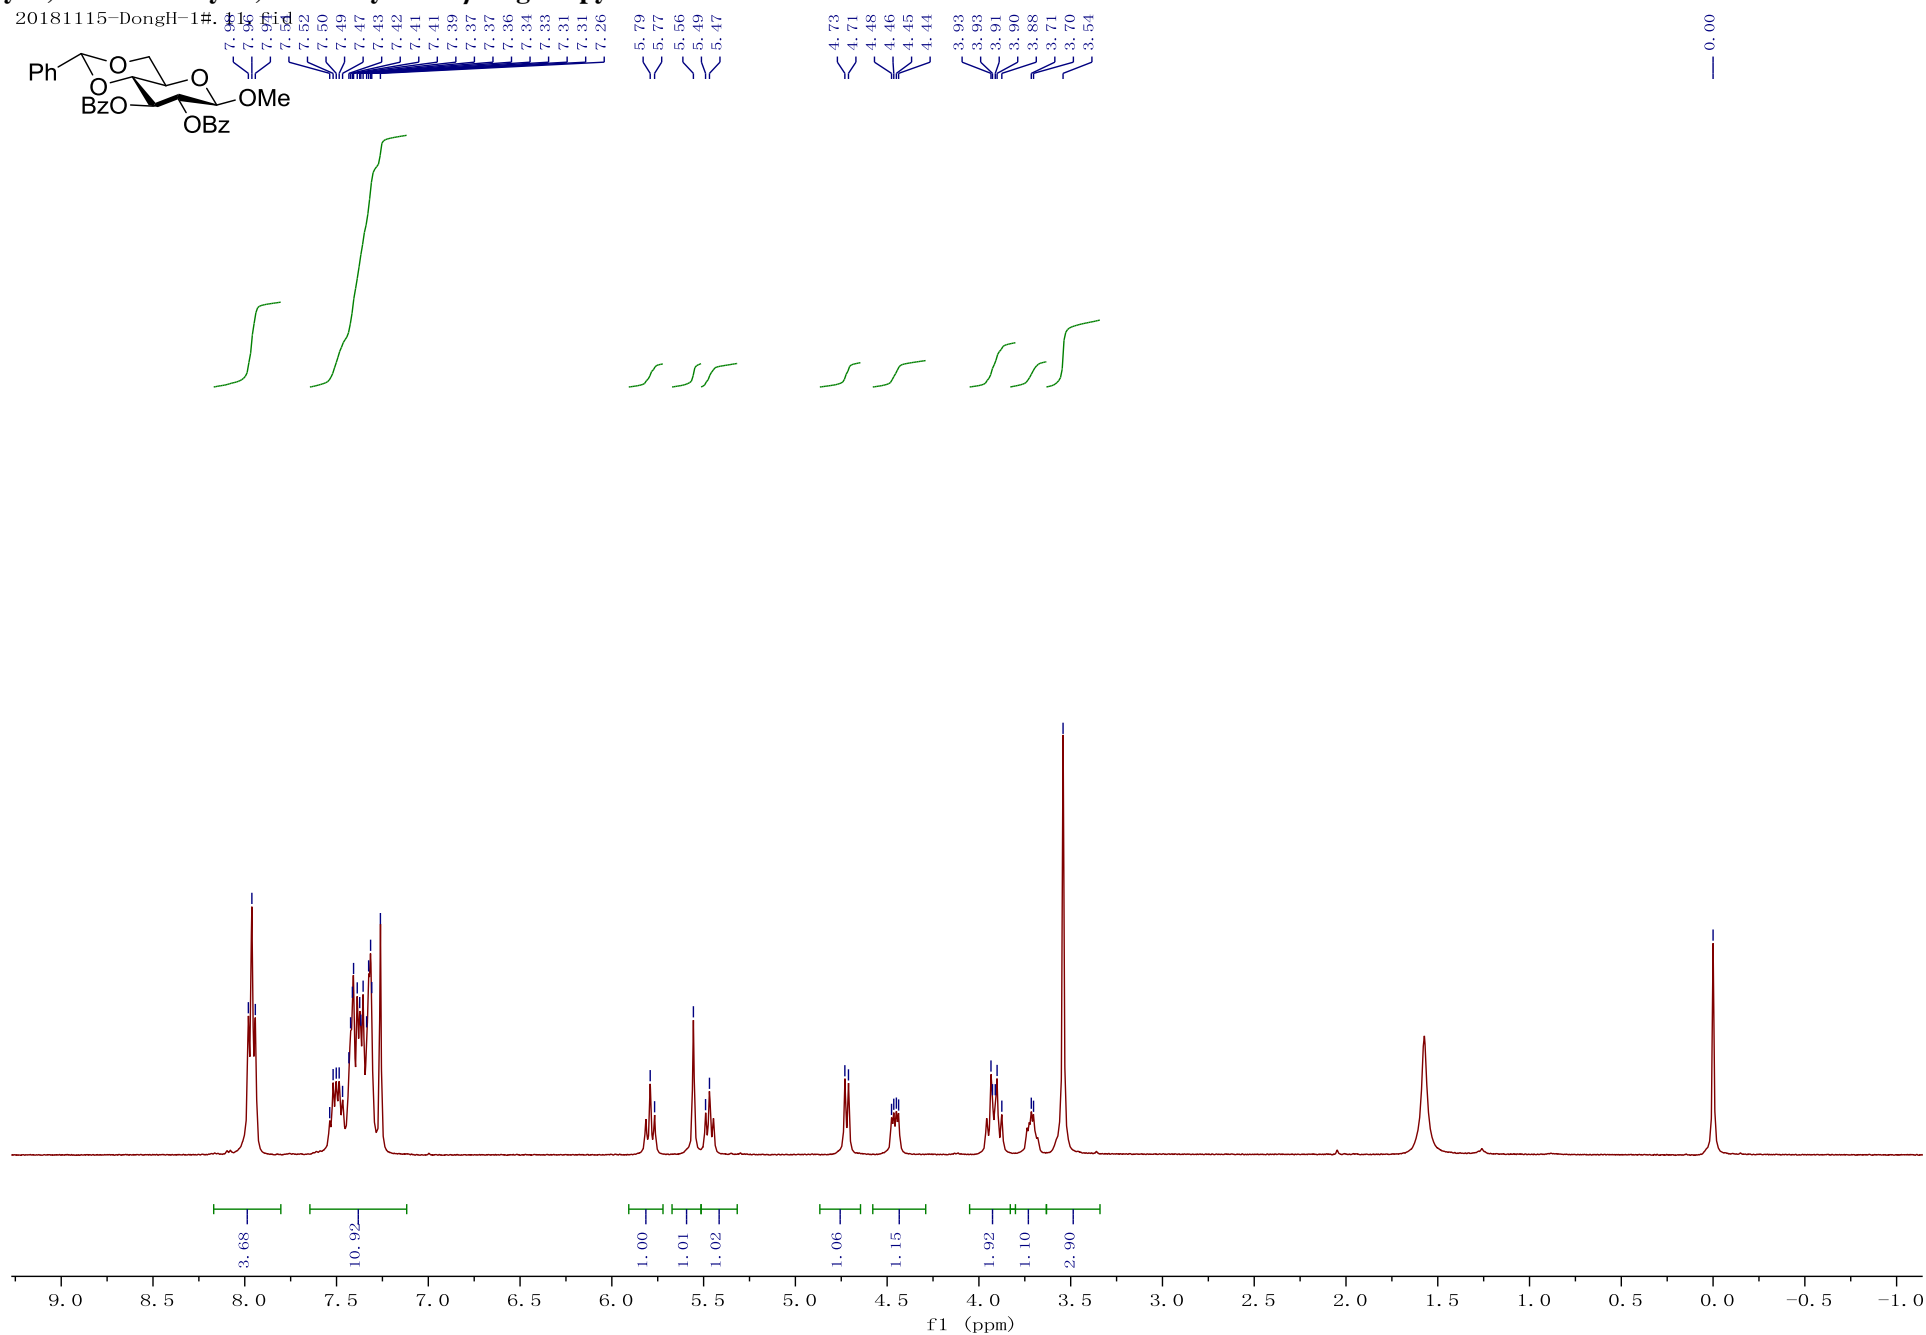

# Methyl 2,3-di-*O*-benzoyl- $\beta$ -D-glucopyranoside 10

20181120-DongH-3#-f1cd

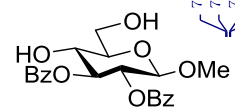

7.97  
7.95  
7.93  
7.51  
7.49  
7.39  
7.38  
7.37  
7.36  
7.35

5.43  
5.42  
5.41  
4.66  
4.65  
4.04  
4.03  
4.01  
4.00  
3.98  
3.96  
3.94  
3.93  
3.91  
3.90  
3.62  
3.61  
3.60  
3.59  
3.58  
3.53

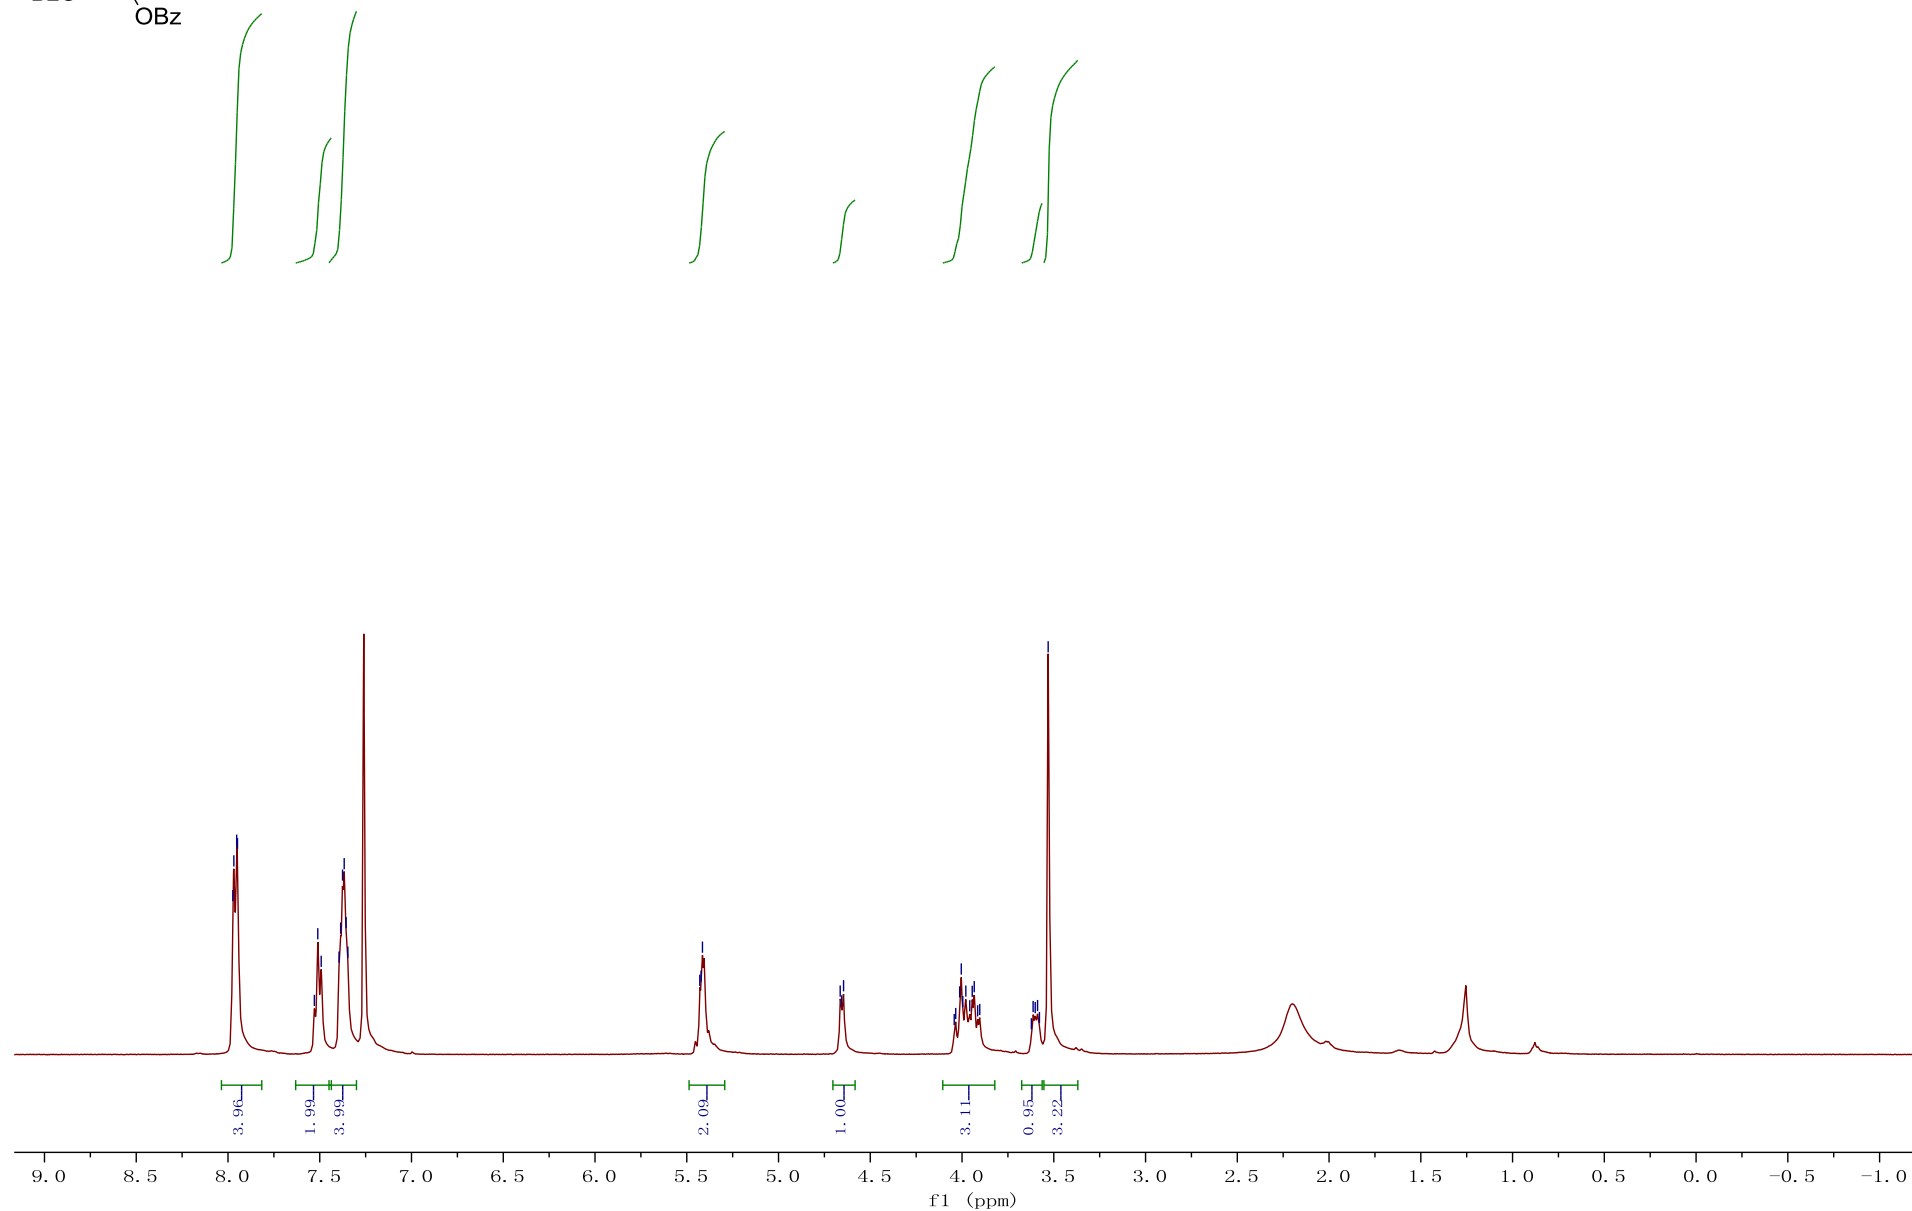

# **Benzyl 2,3-di-*O*-acetyl-4,6-*O*-benzylidene-1-thio- $\beta$ -D-glucopyranoside **11****

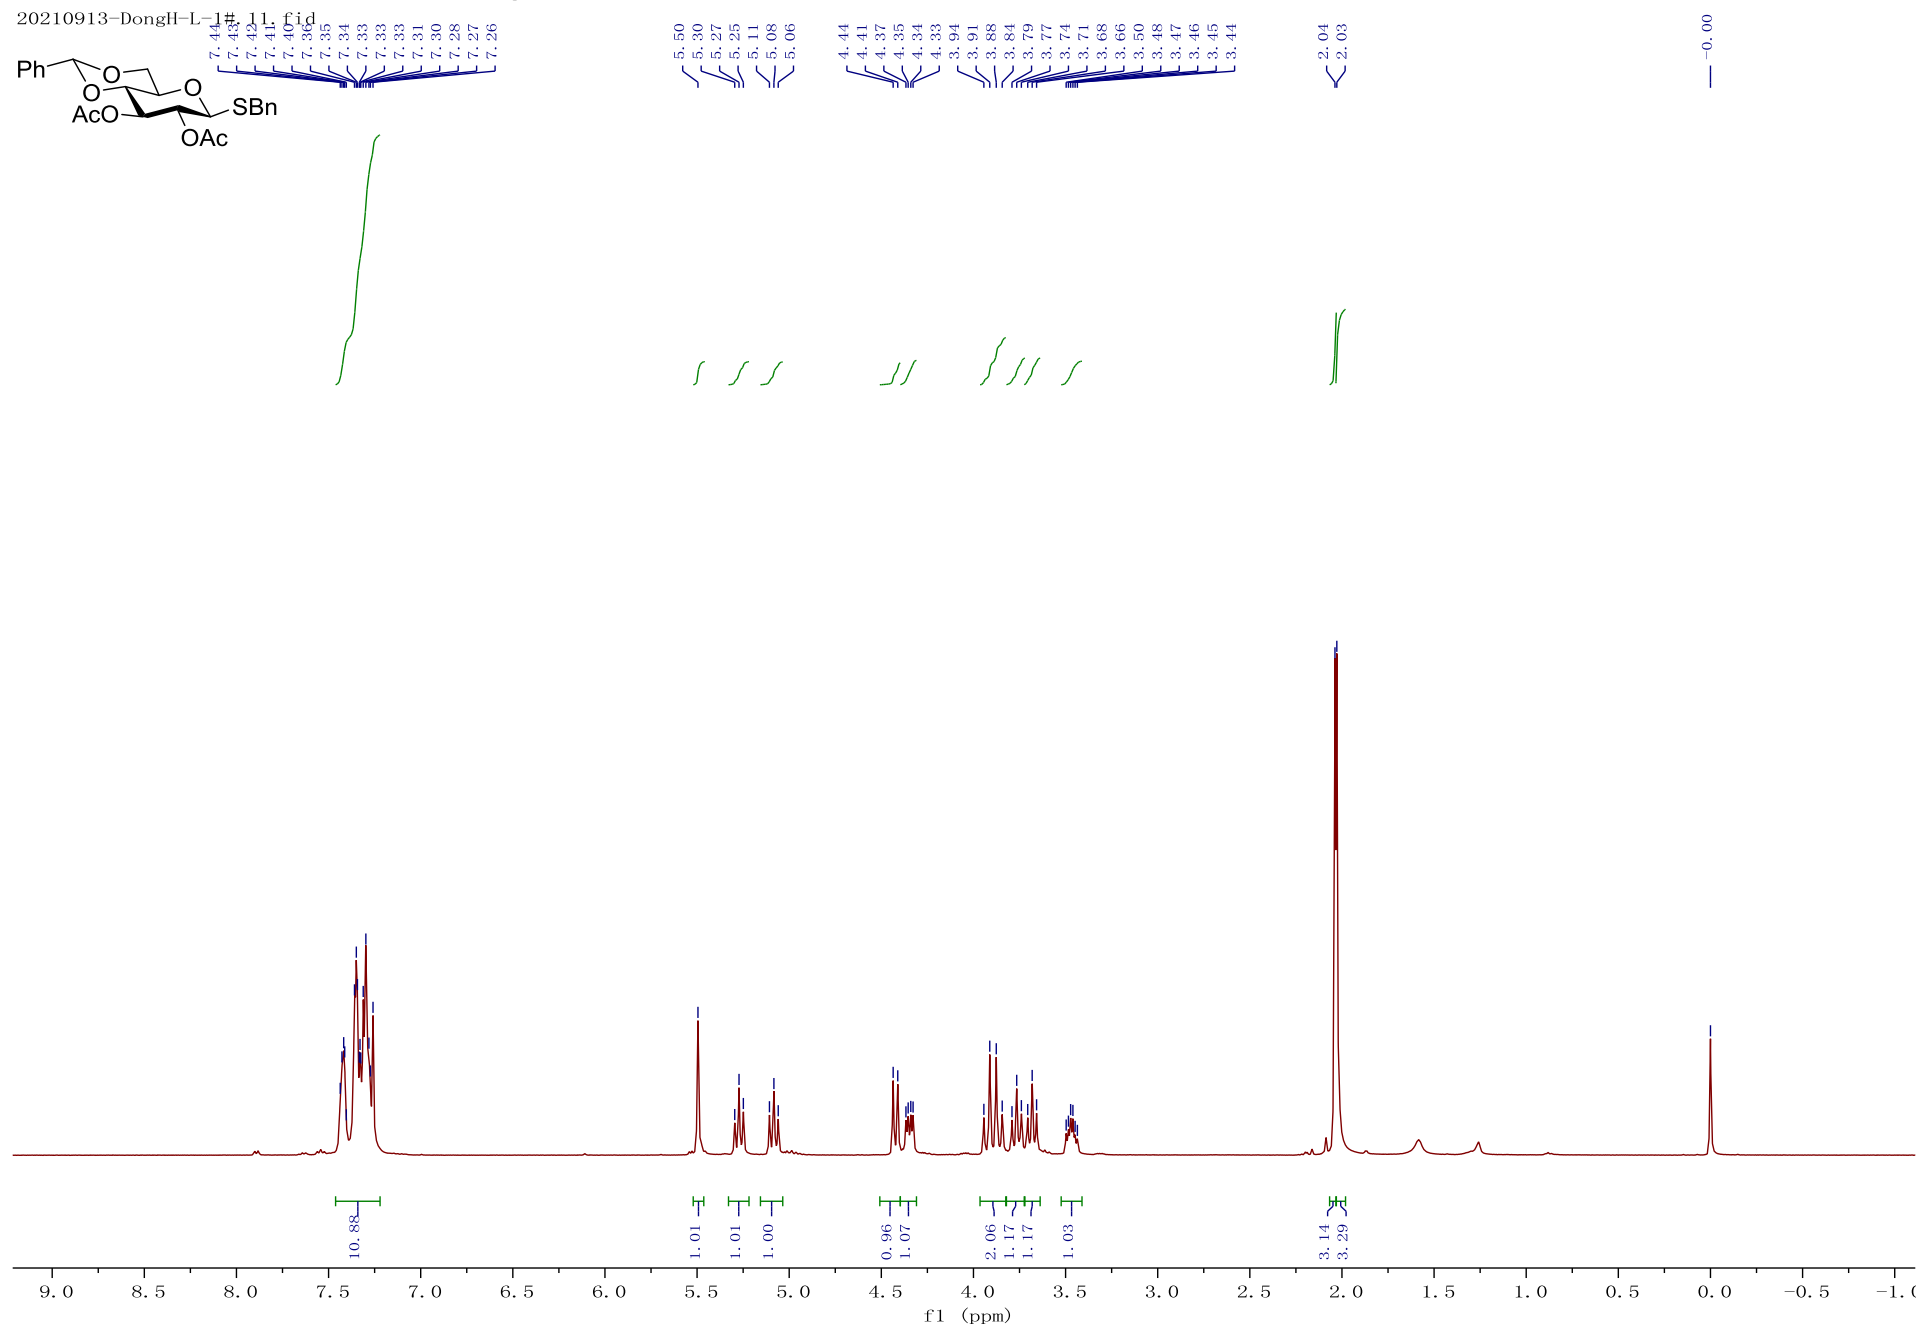

**Benzyl 2,3-di-*O*-acetyl-4,6-*O*-benzylidene-1-thio- $\beta$ -D-glucopyranoside 11**

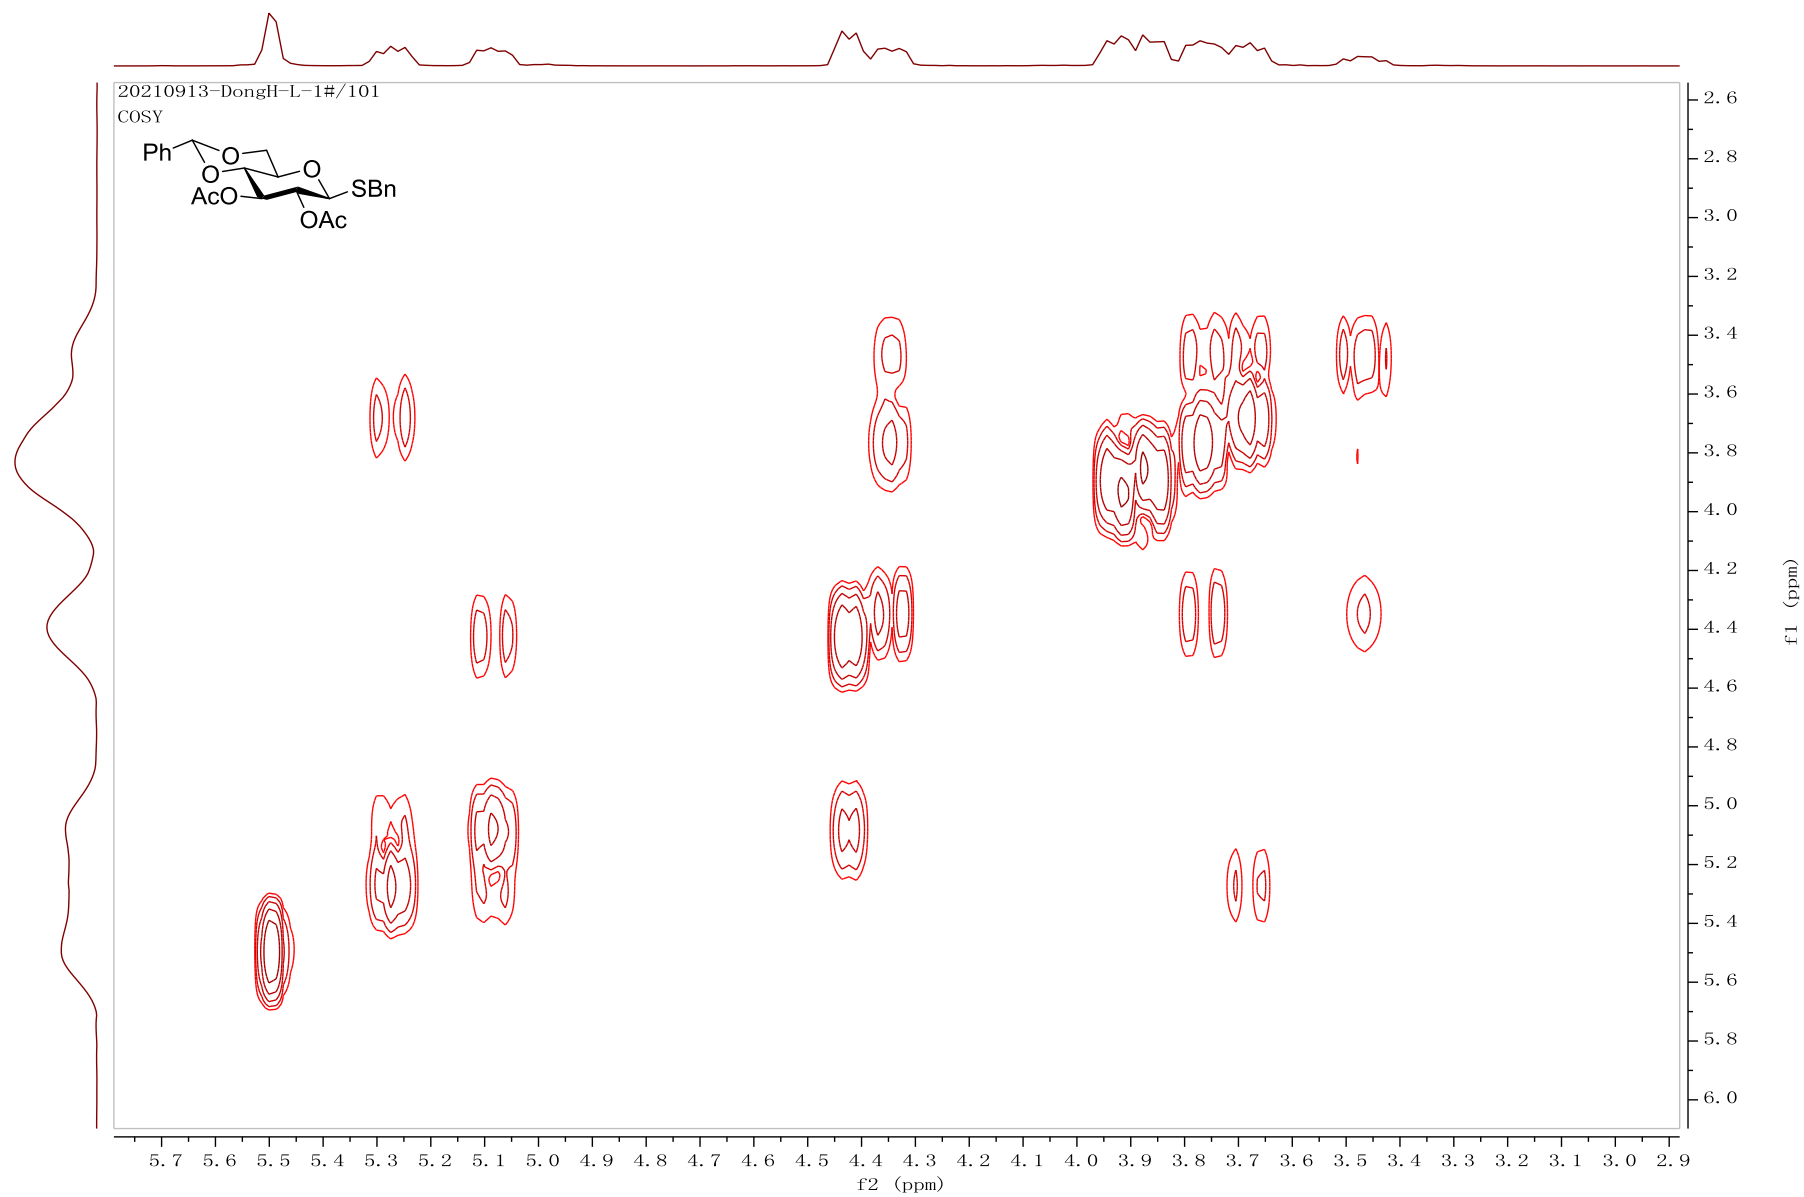

# Benzyl 2,3-di-*O*-acetyl-4,6-*O*-benzylidene-1-thio- $\beta$ -D-glucopyranoside **11**

20210913-DongH-L-11-21.fid

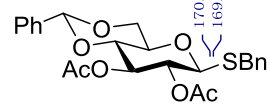

136.86  
136.73  
129.16  
129.03  
128.65  
128.26  
127.45  
126.12

101.49

83.07  
78.36  
72.71  
70.64  
70.52  
68.45

34.25

20.79  
20.72

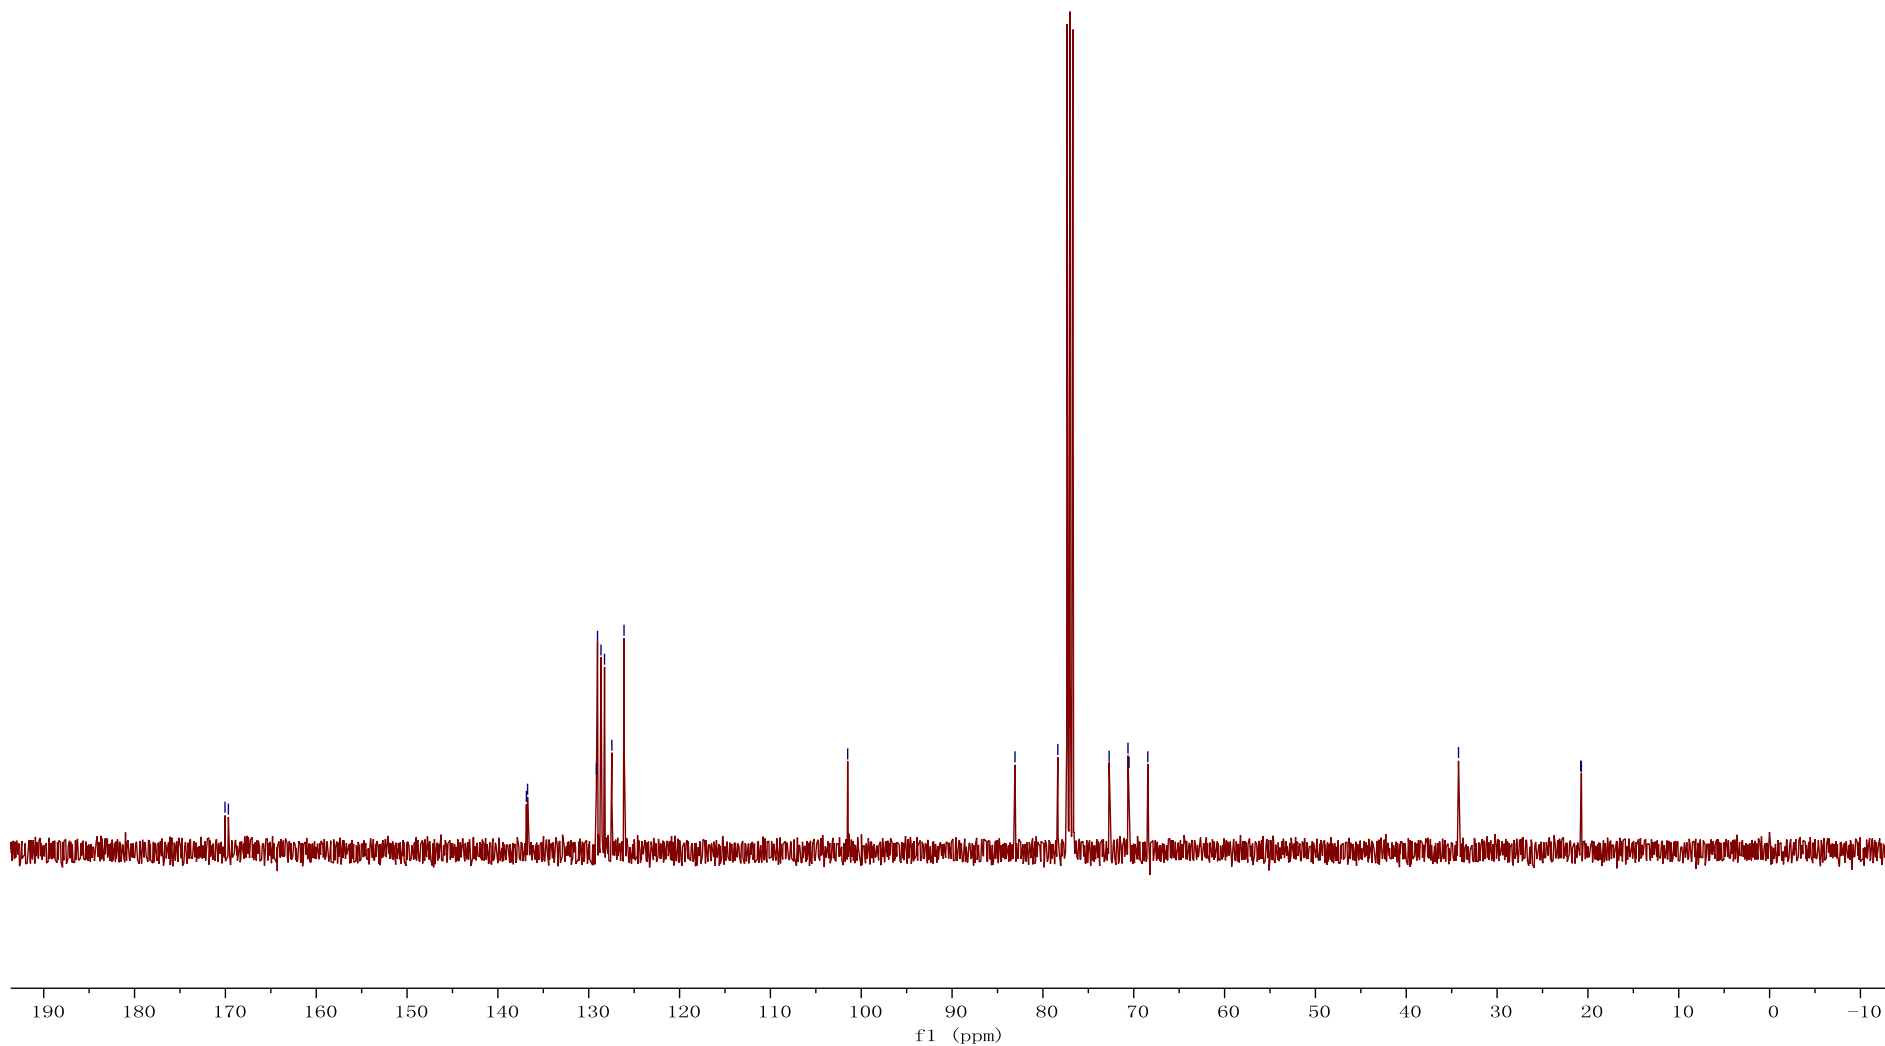

# **Benzyl 2,3-di-*O*-acetyl-1-thio- $\beta$ -D-glucopyranoside 12**

2, 3-OAc- $\beta$ -SBndonghai-20191011-08/1

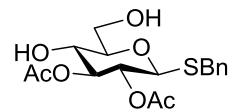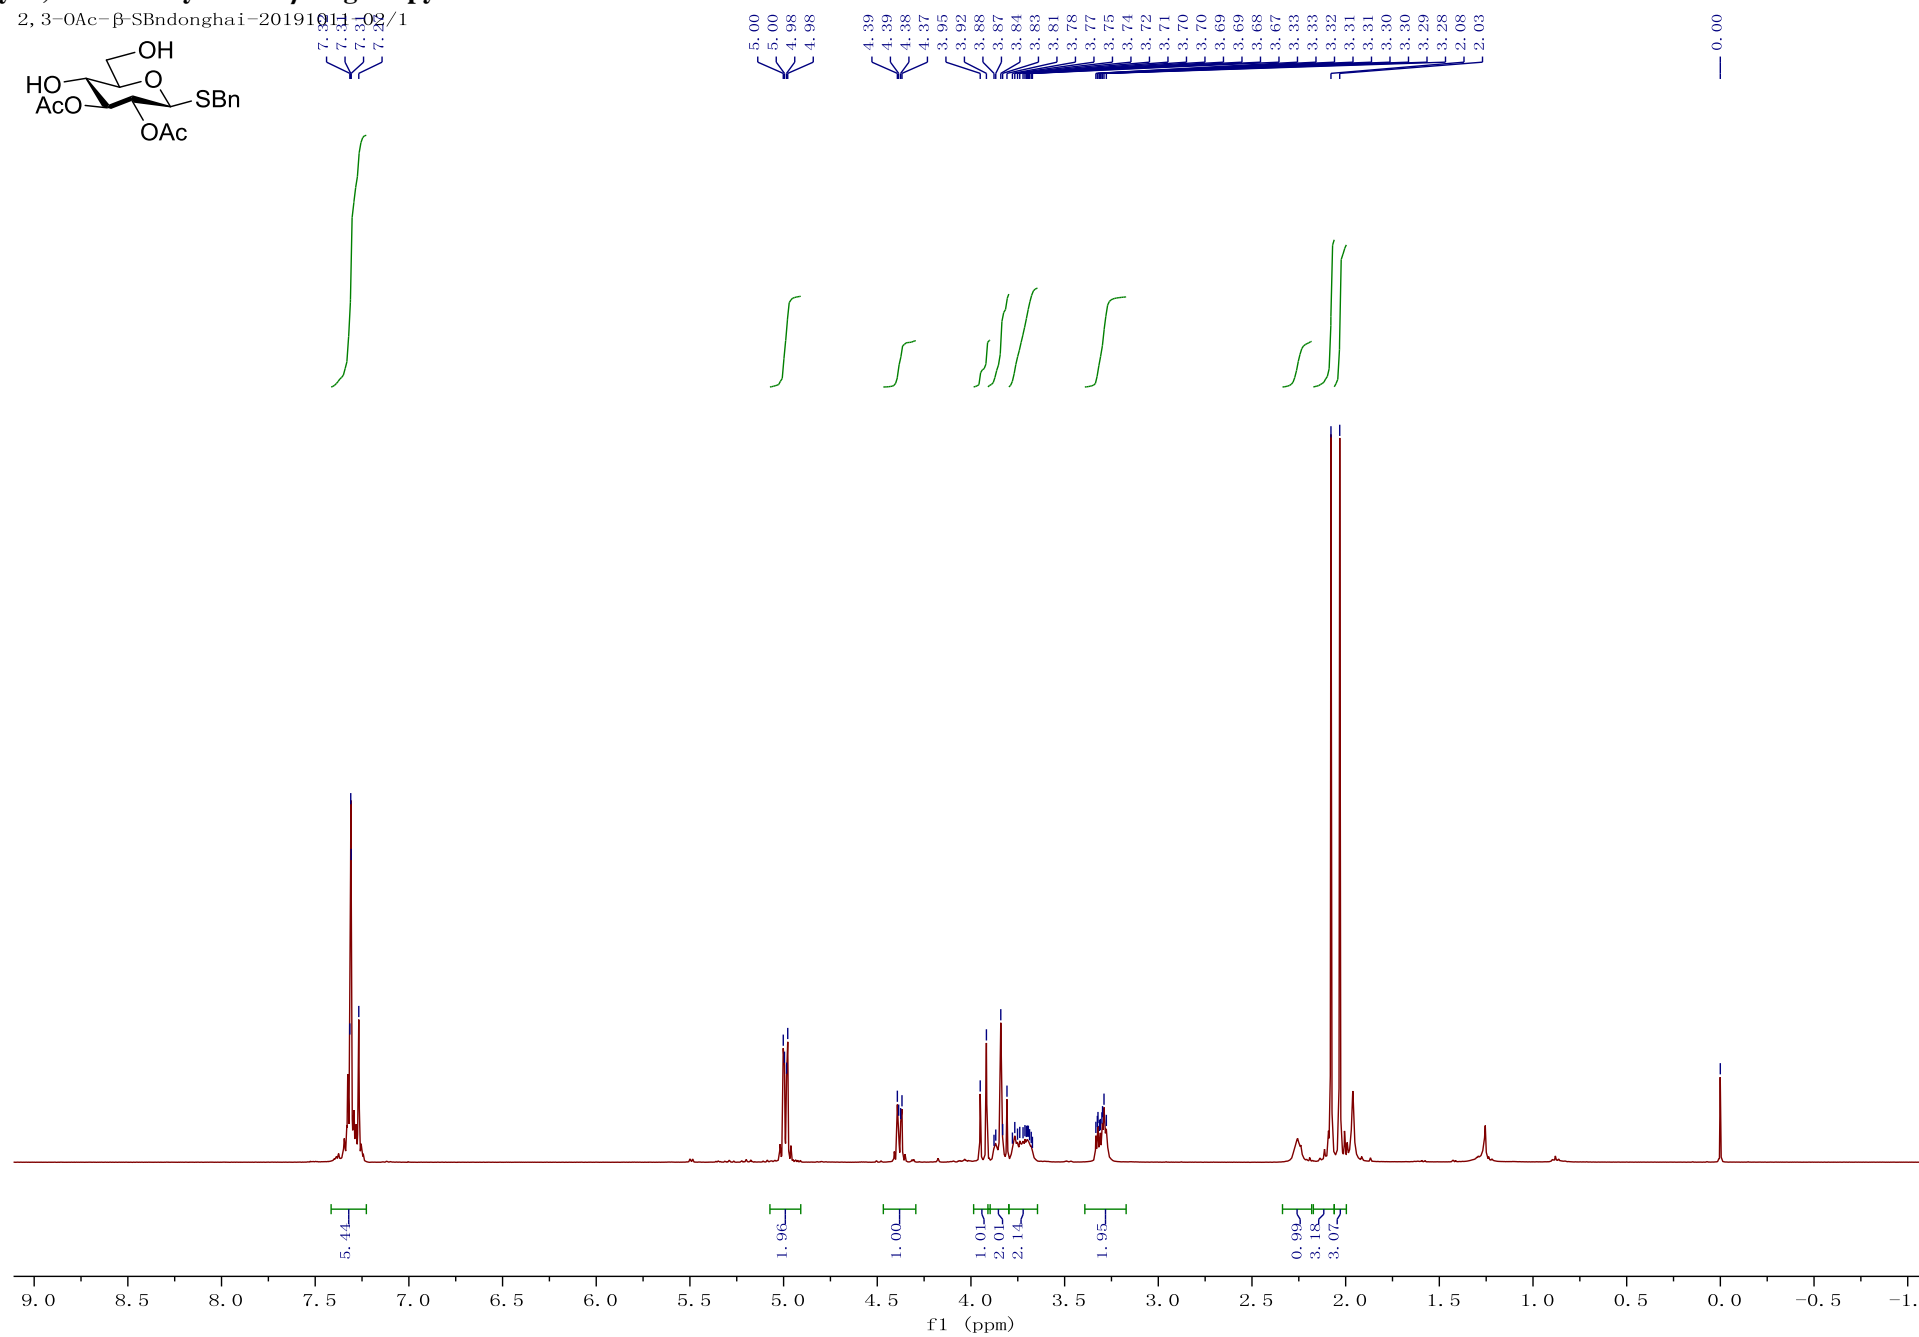



**Benzyl 2,3-di-*O*-acetyl-1-thio- $\beta$ -D-glucopyranoside 12**

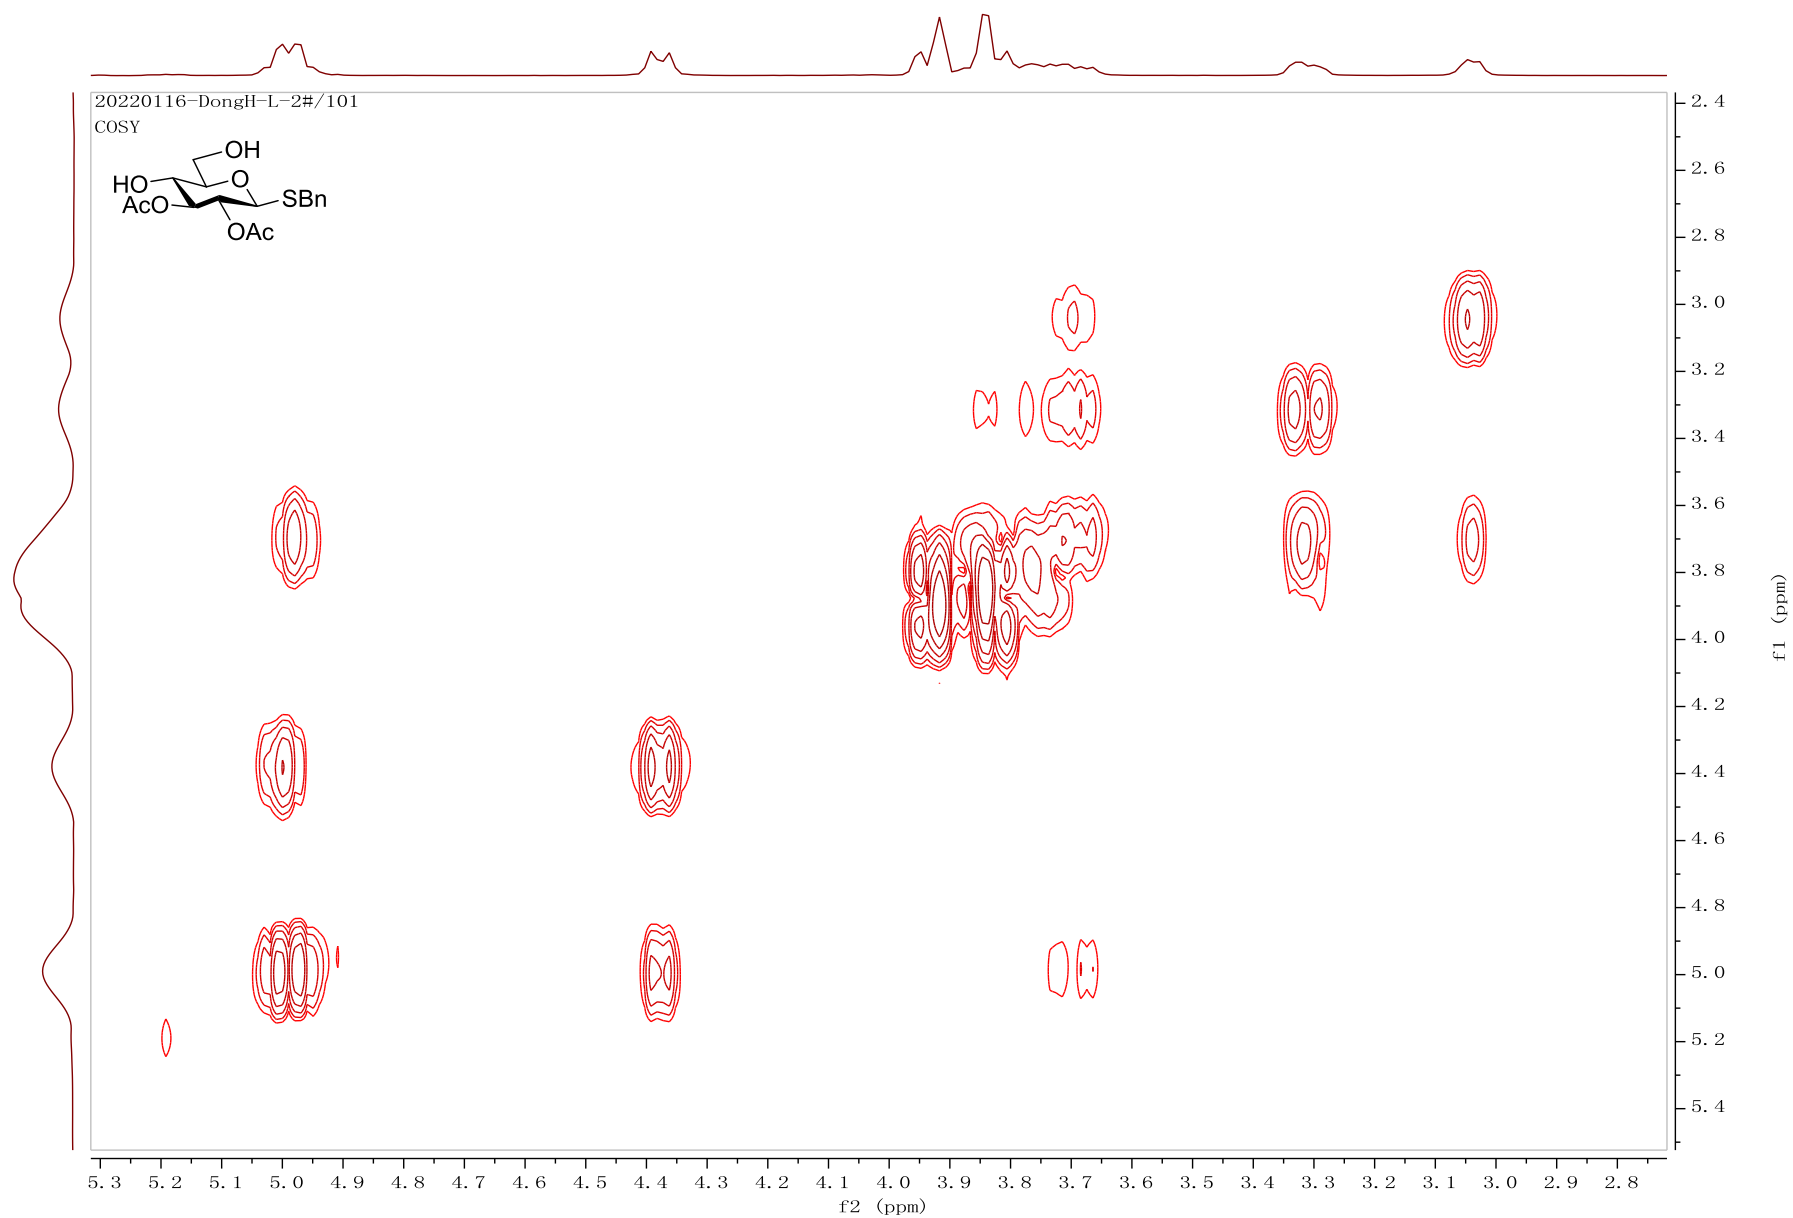

# Benzyl 2,3-di-*O*-acetyl-1-thio- $\beta$ -D-glucopyranoside 12

20220111-DongH-84#. 21. fid

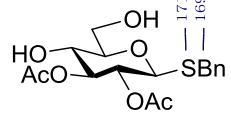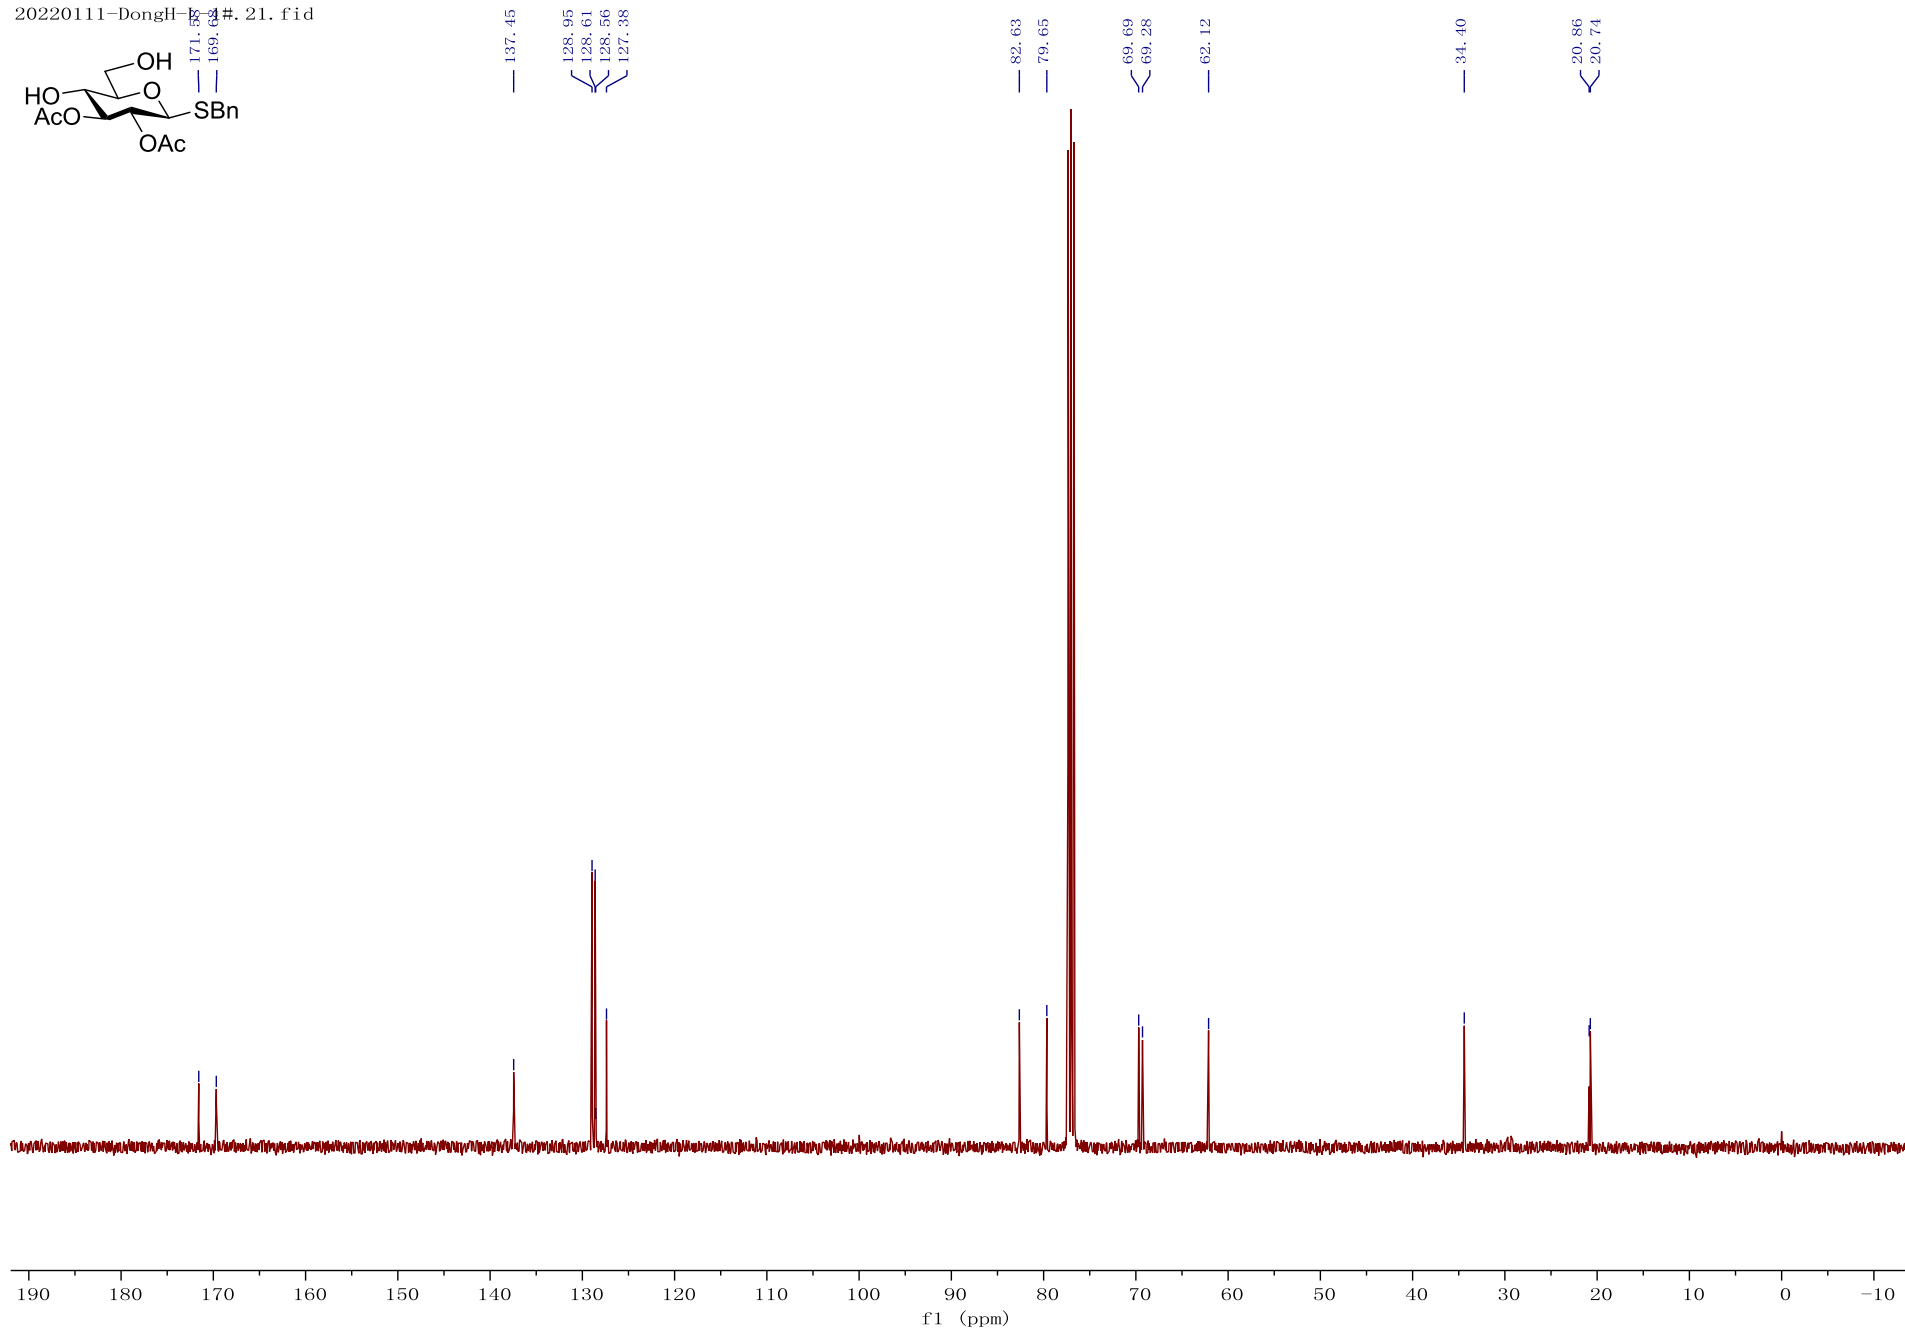

# 4-Methylphenyl 2,3-di-*O*-acetyl-4,6-*O*-benzylidene-1-thio- $\beta$ -D-glucopyranoside 13

20210604-DongH-L-4#. 11

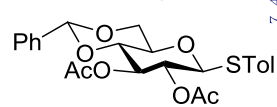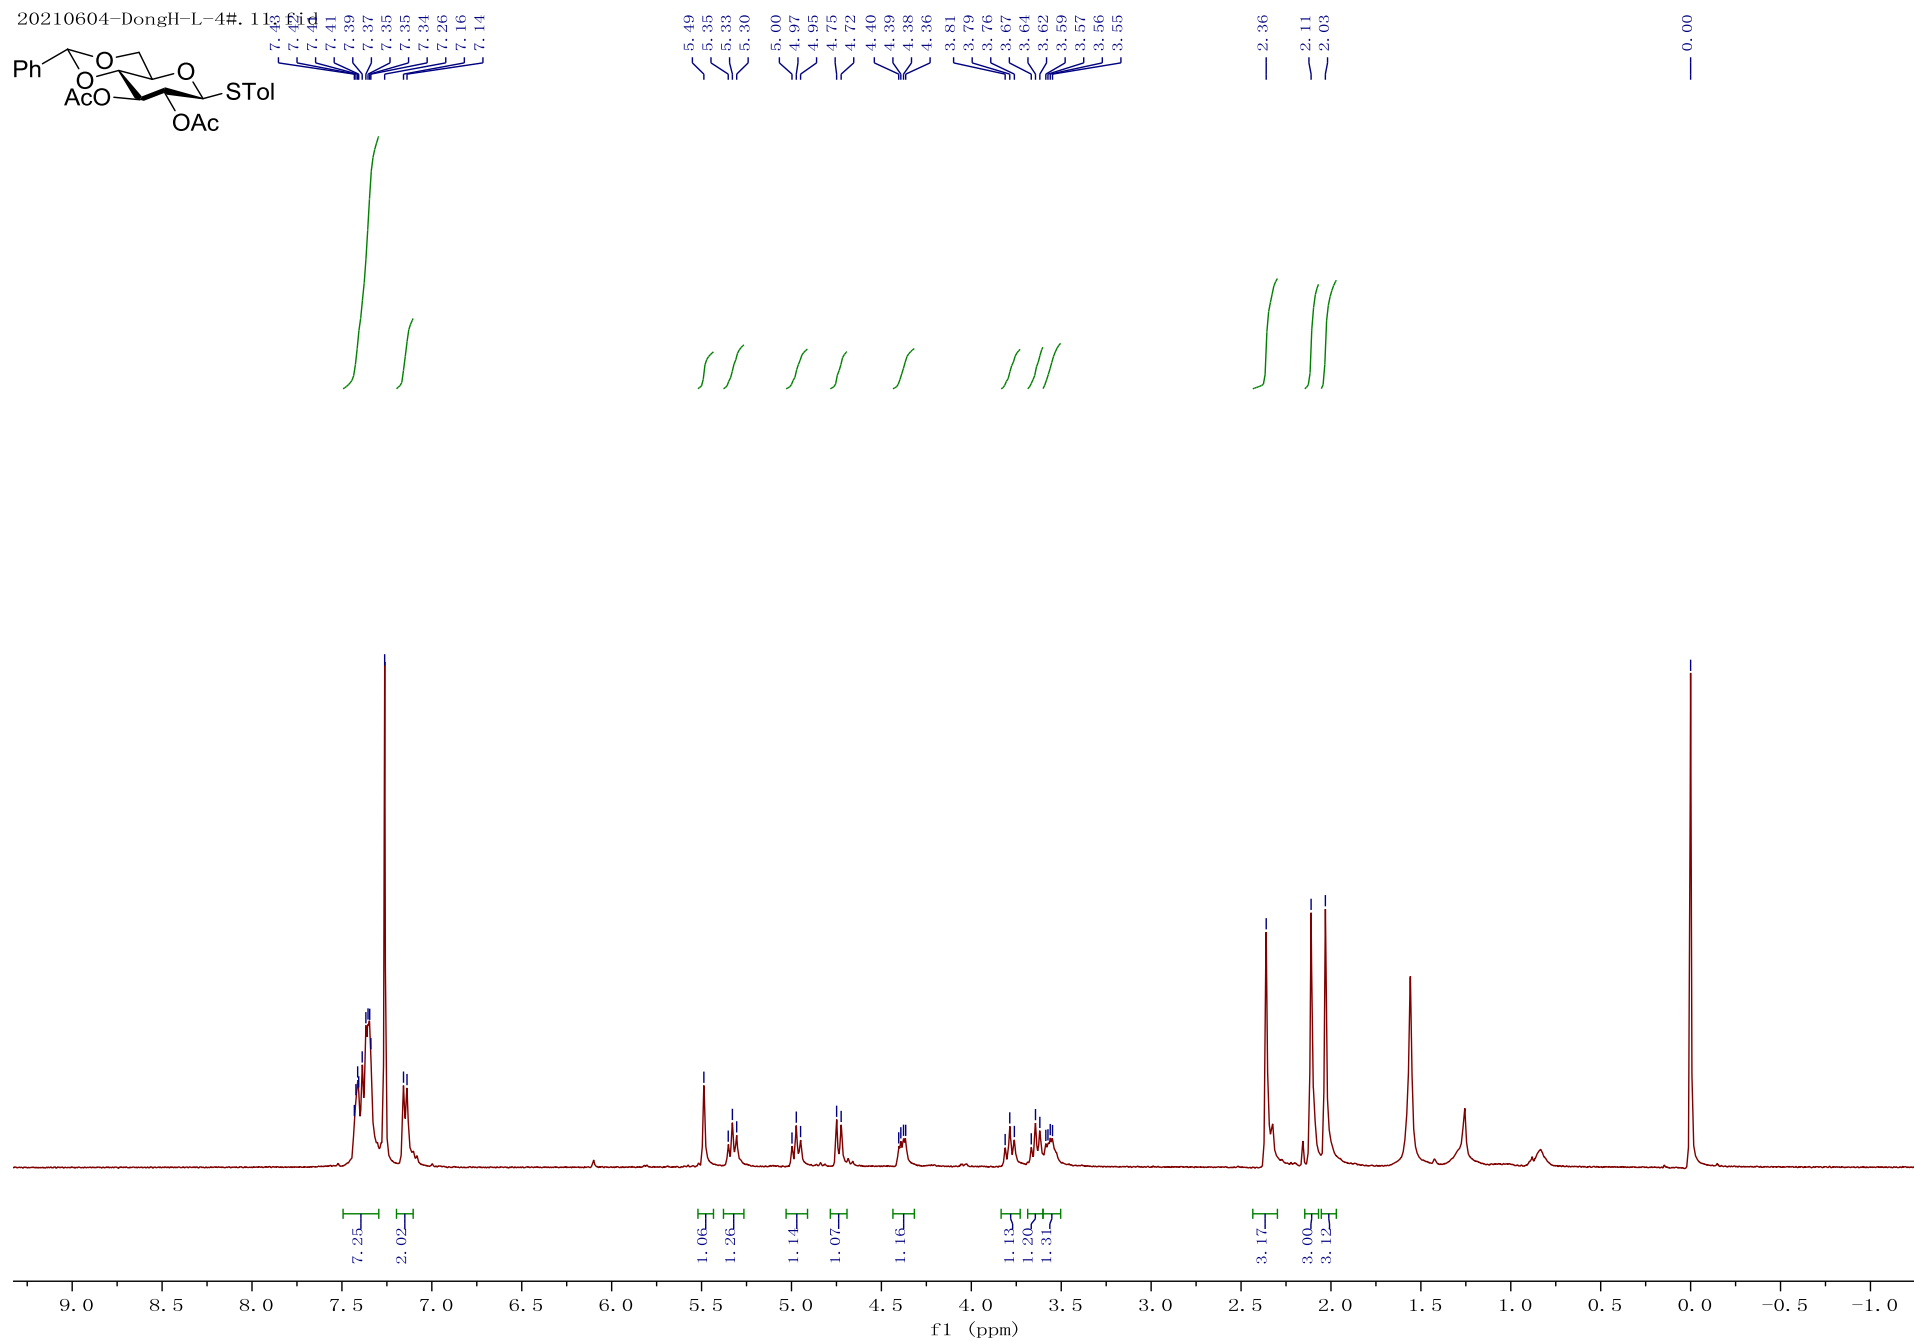

# 4-Methylphenyl 2,3-di-*O*-acetyl-1-thio- $\beta$ -D-glucopyranoside 14

donghai-20190327-306/1

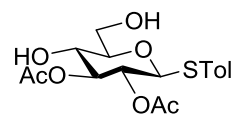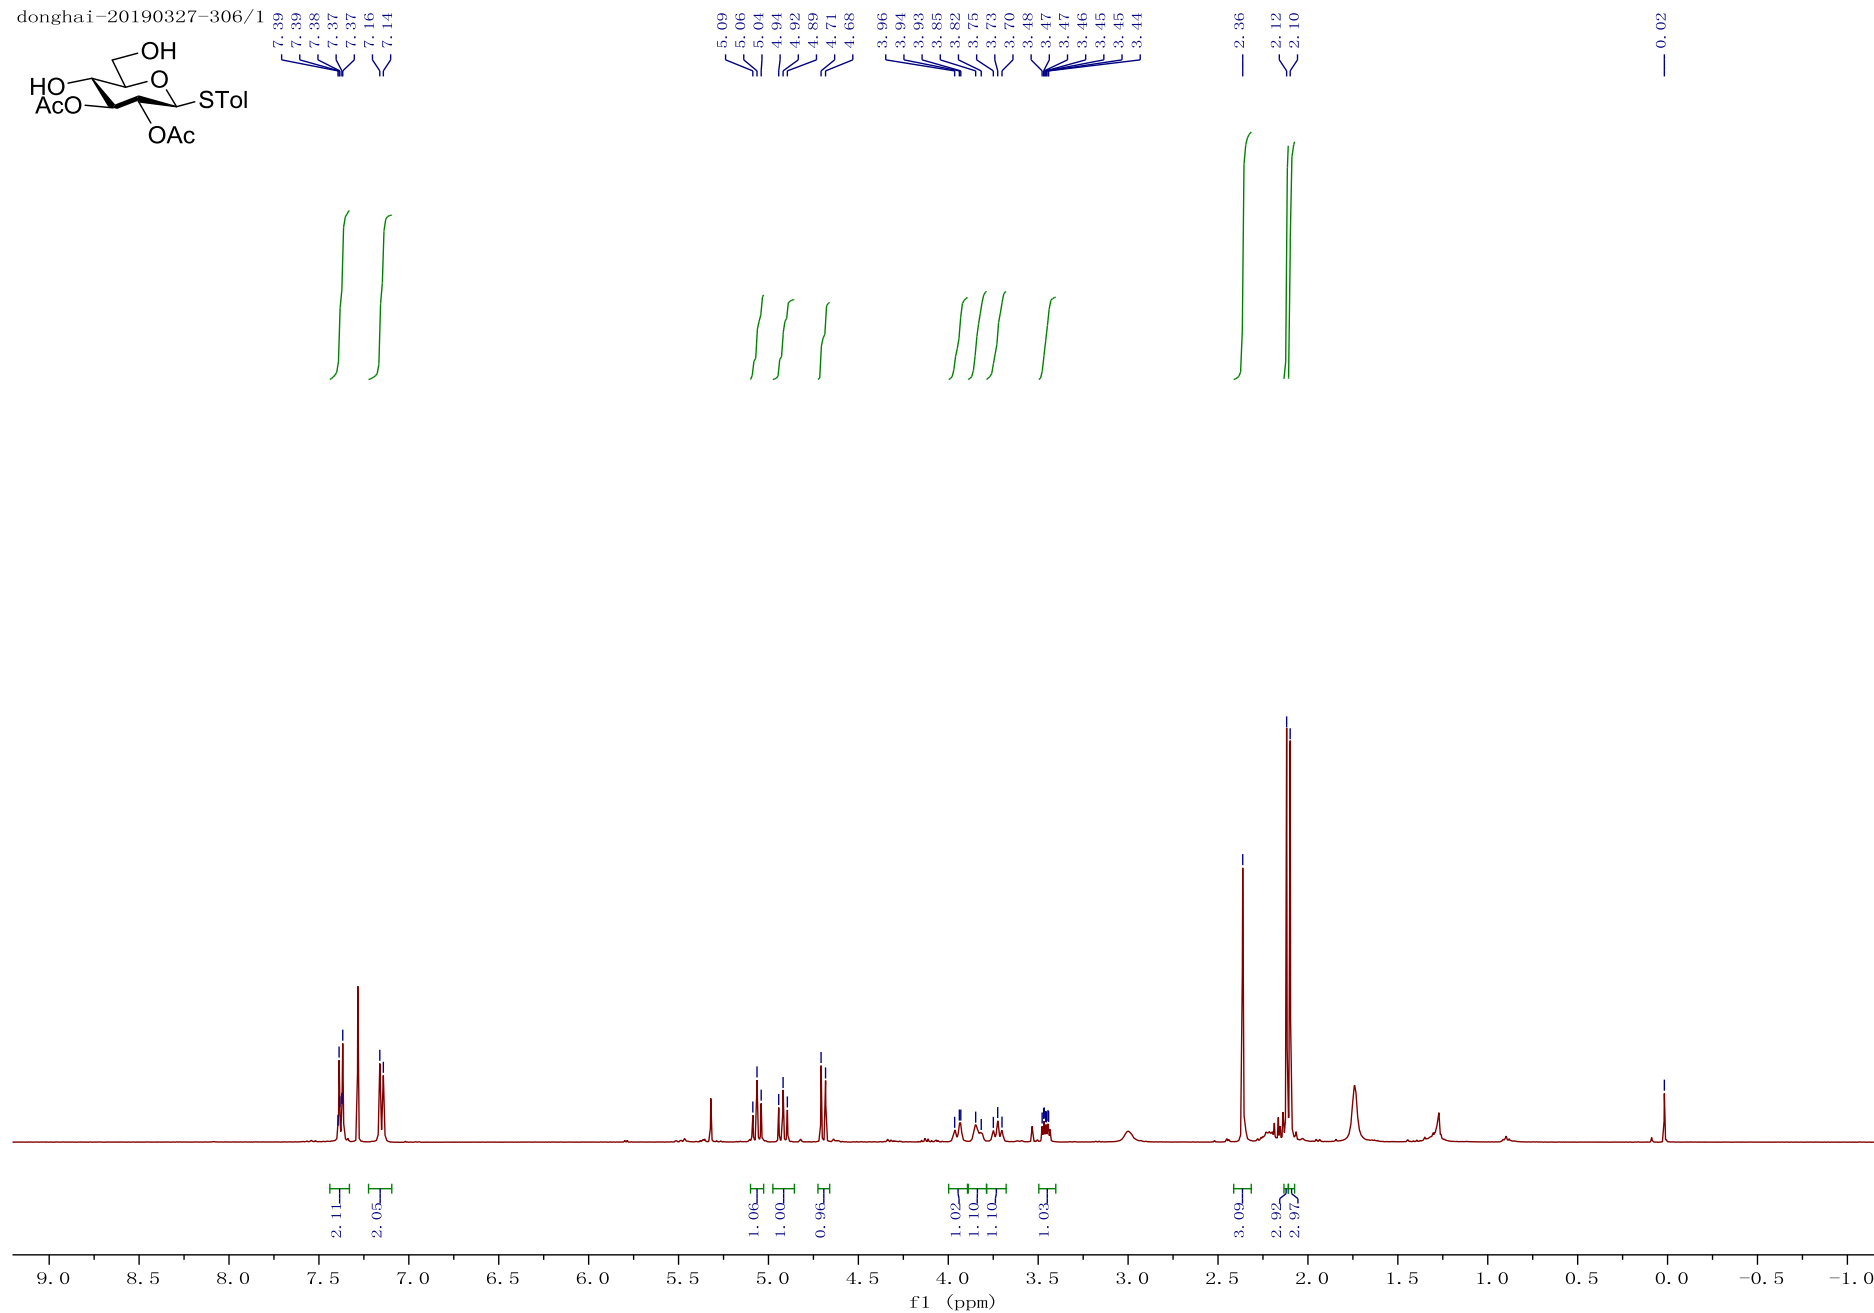

Methyl 2,3-di-O-benzyl-4,6-O-benzylidene- $\alpha$ -D-galactopyranoside 15

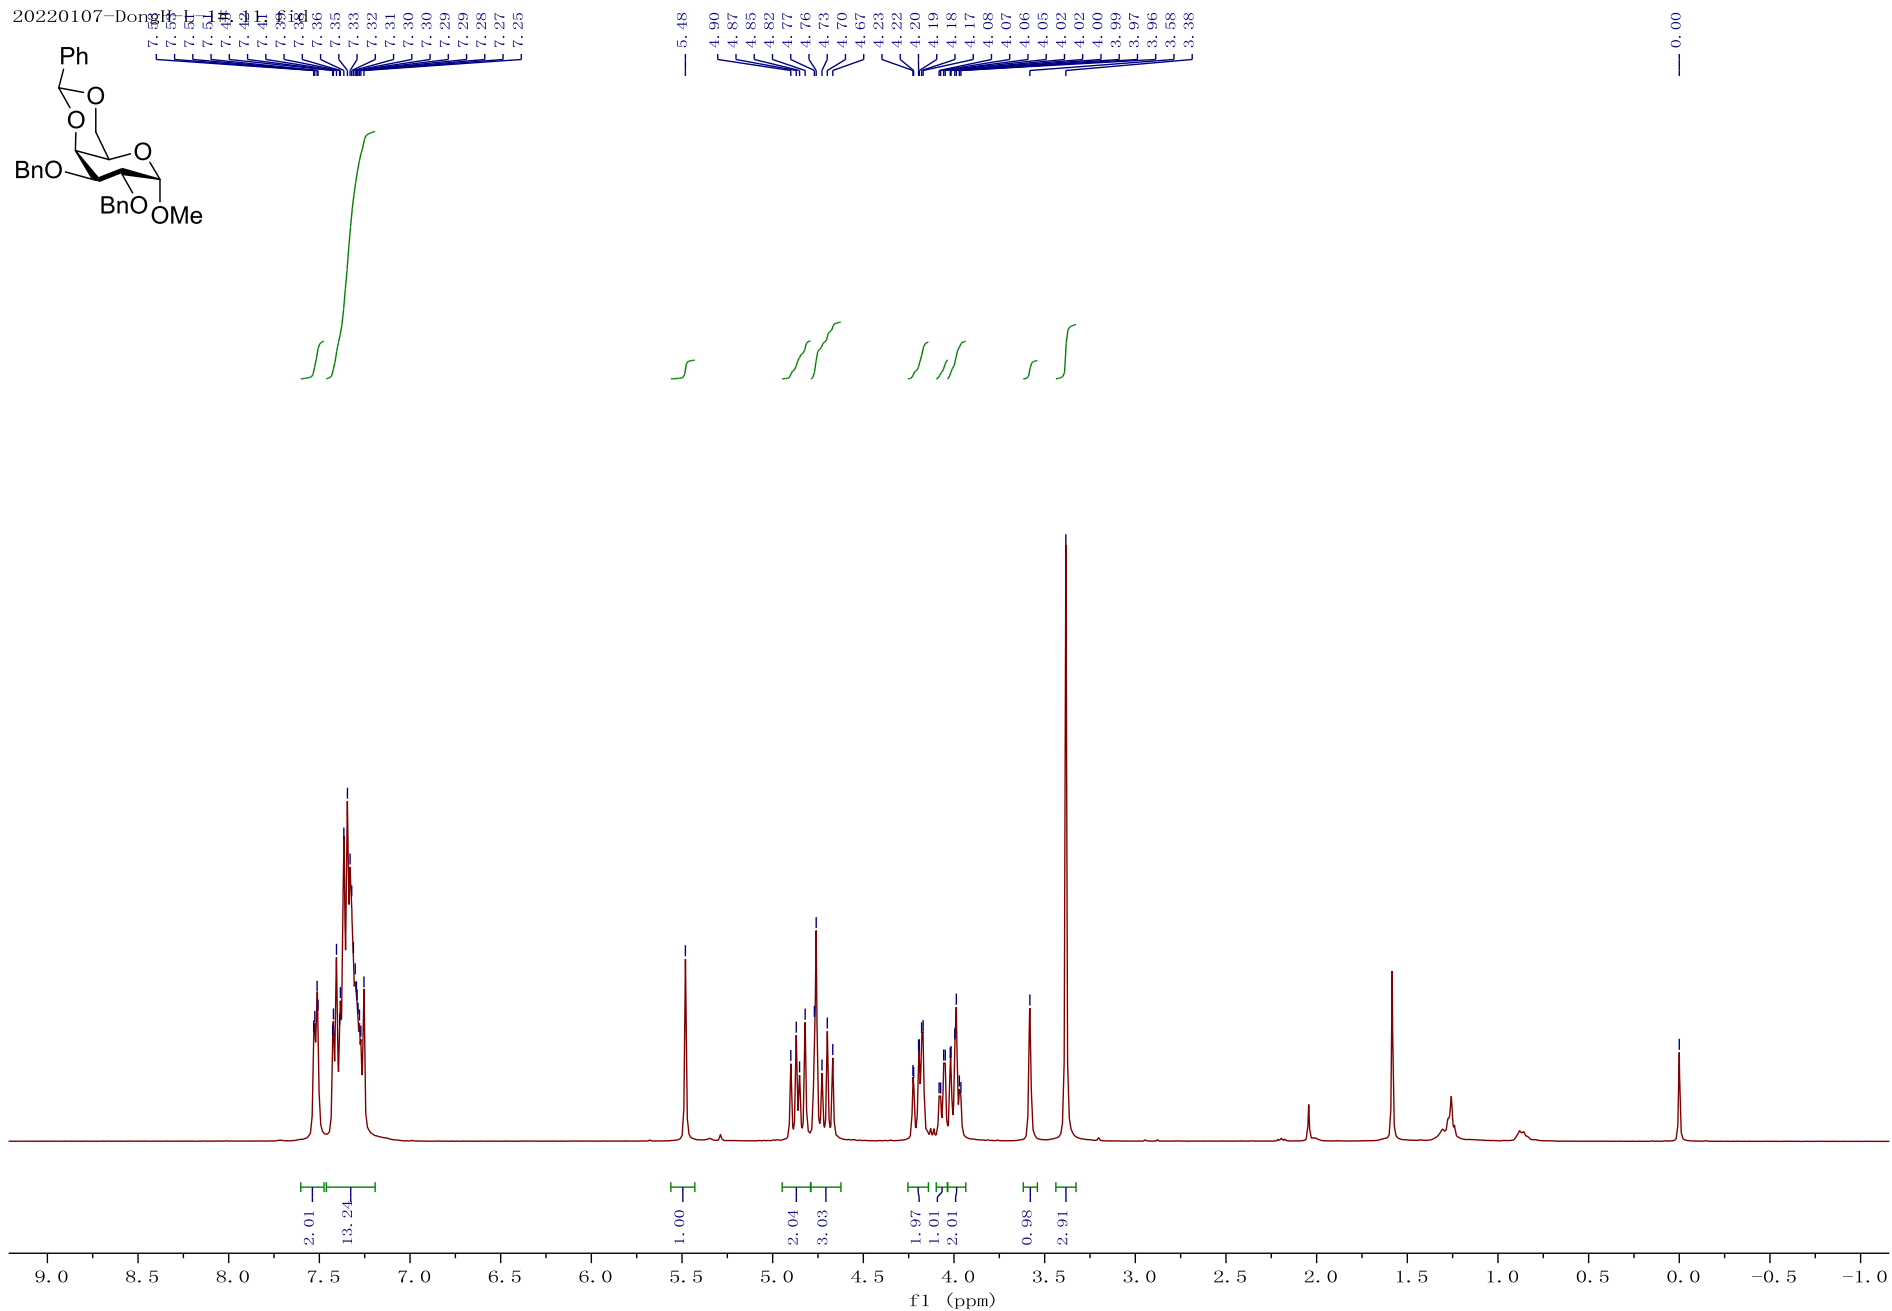

# Methyl 2,3-di-*O*-benzyl- $\alpha$ -D-galactopyranoside 16

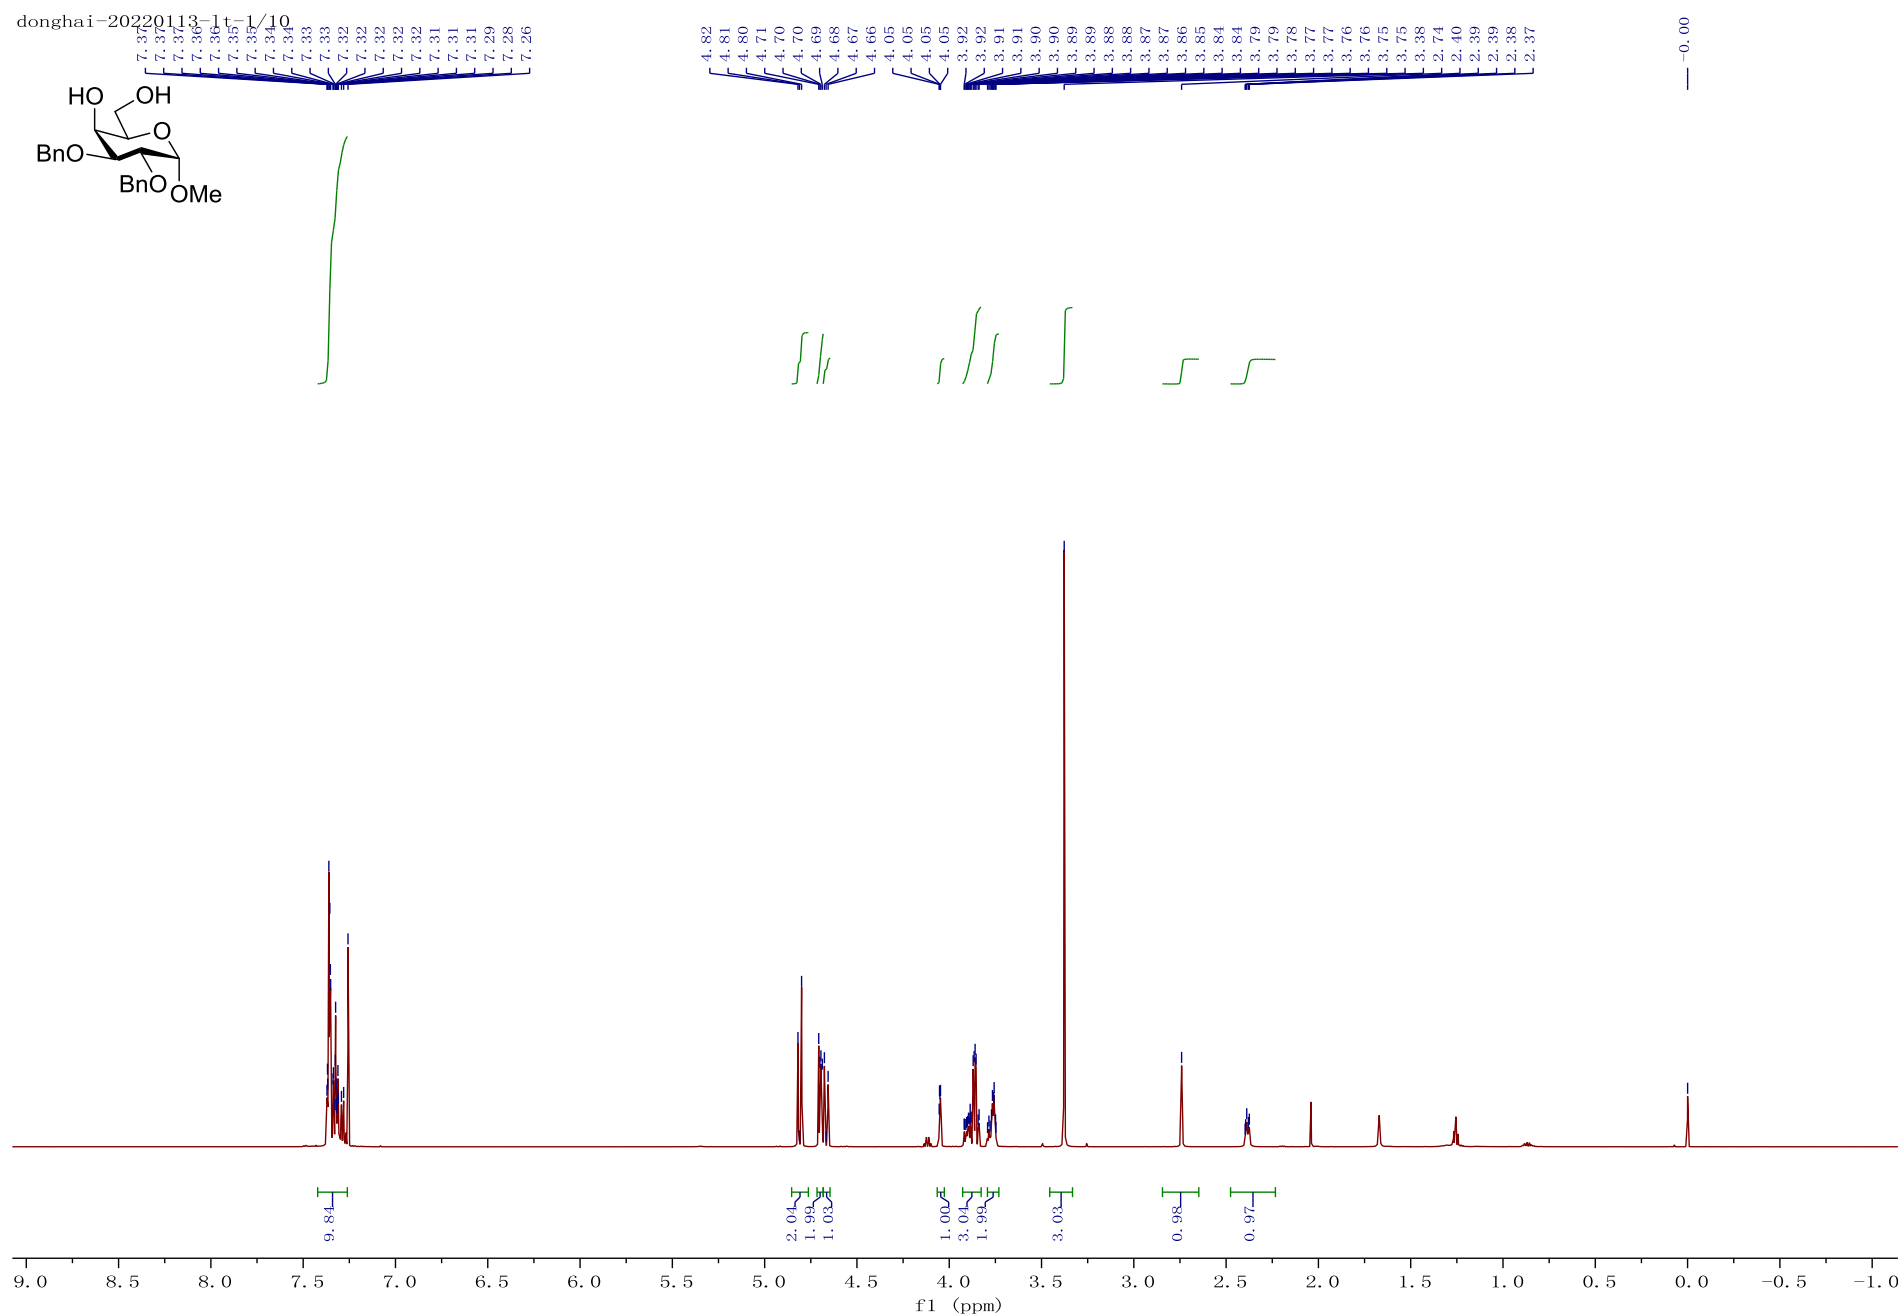

Methyl 2,3-di-O-benzyl-4,6-O-benzylidene-β-D-galactopyranoside 17

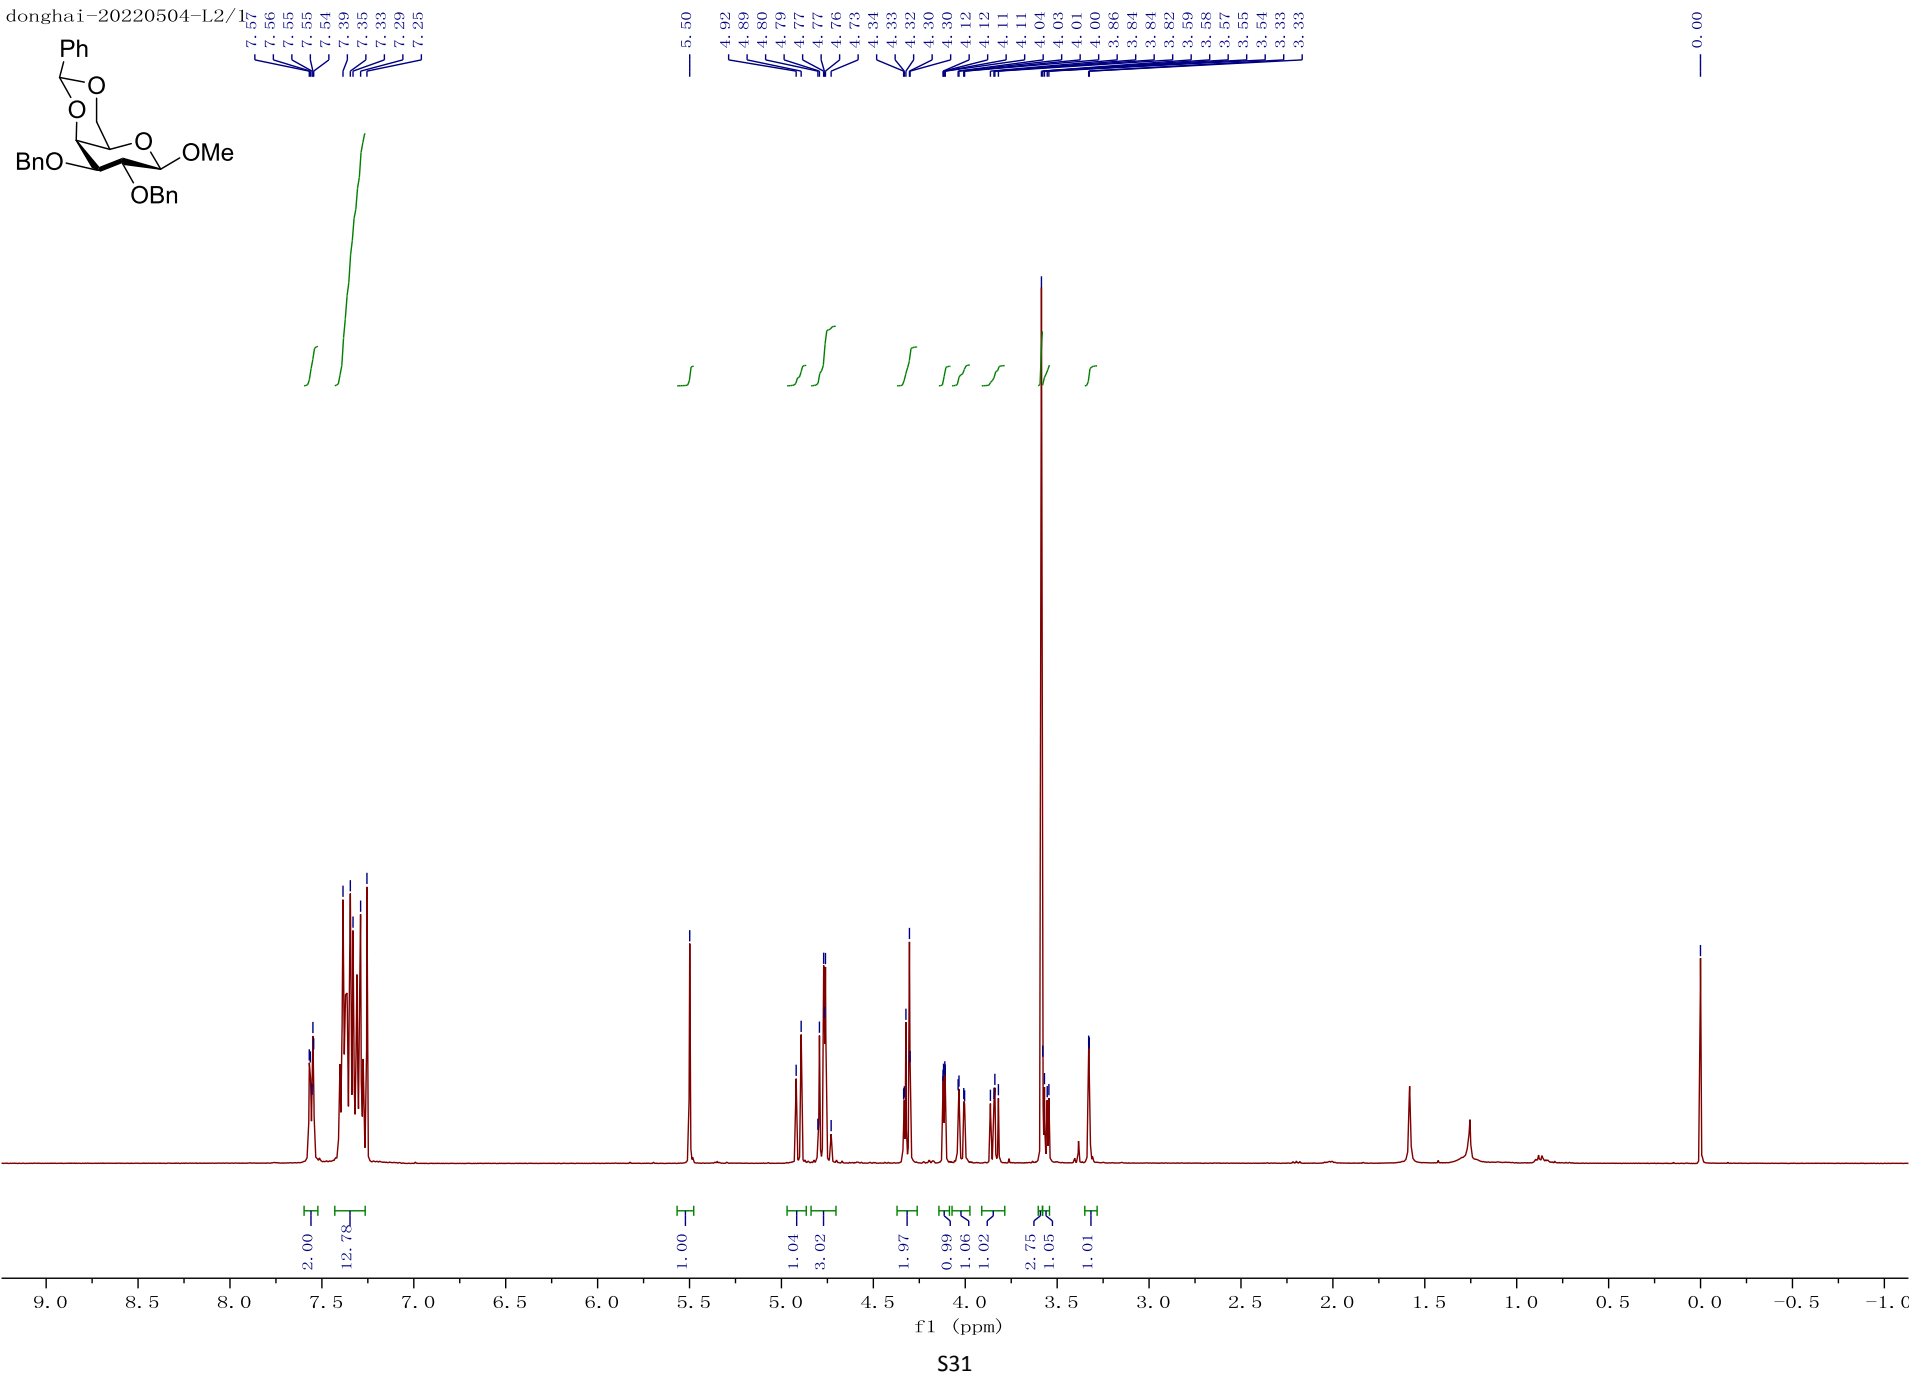

# Methyl 2,3-di-*O*-benzyl- $\beta$ -D-galactopyranoside 18

donghai-20220509-12

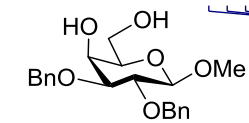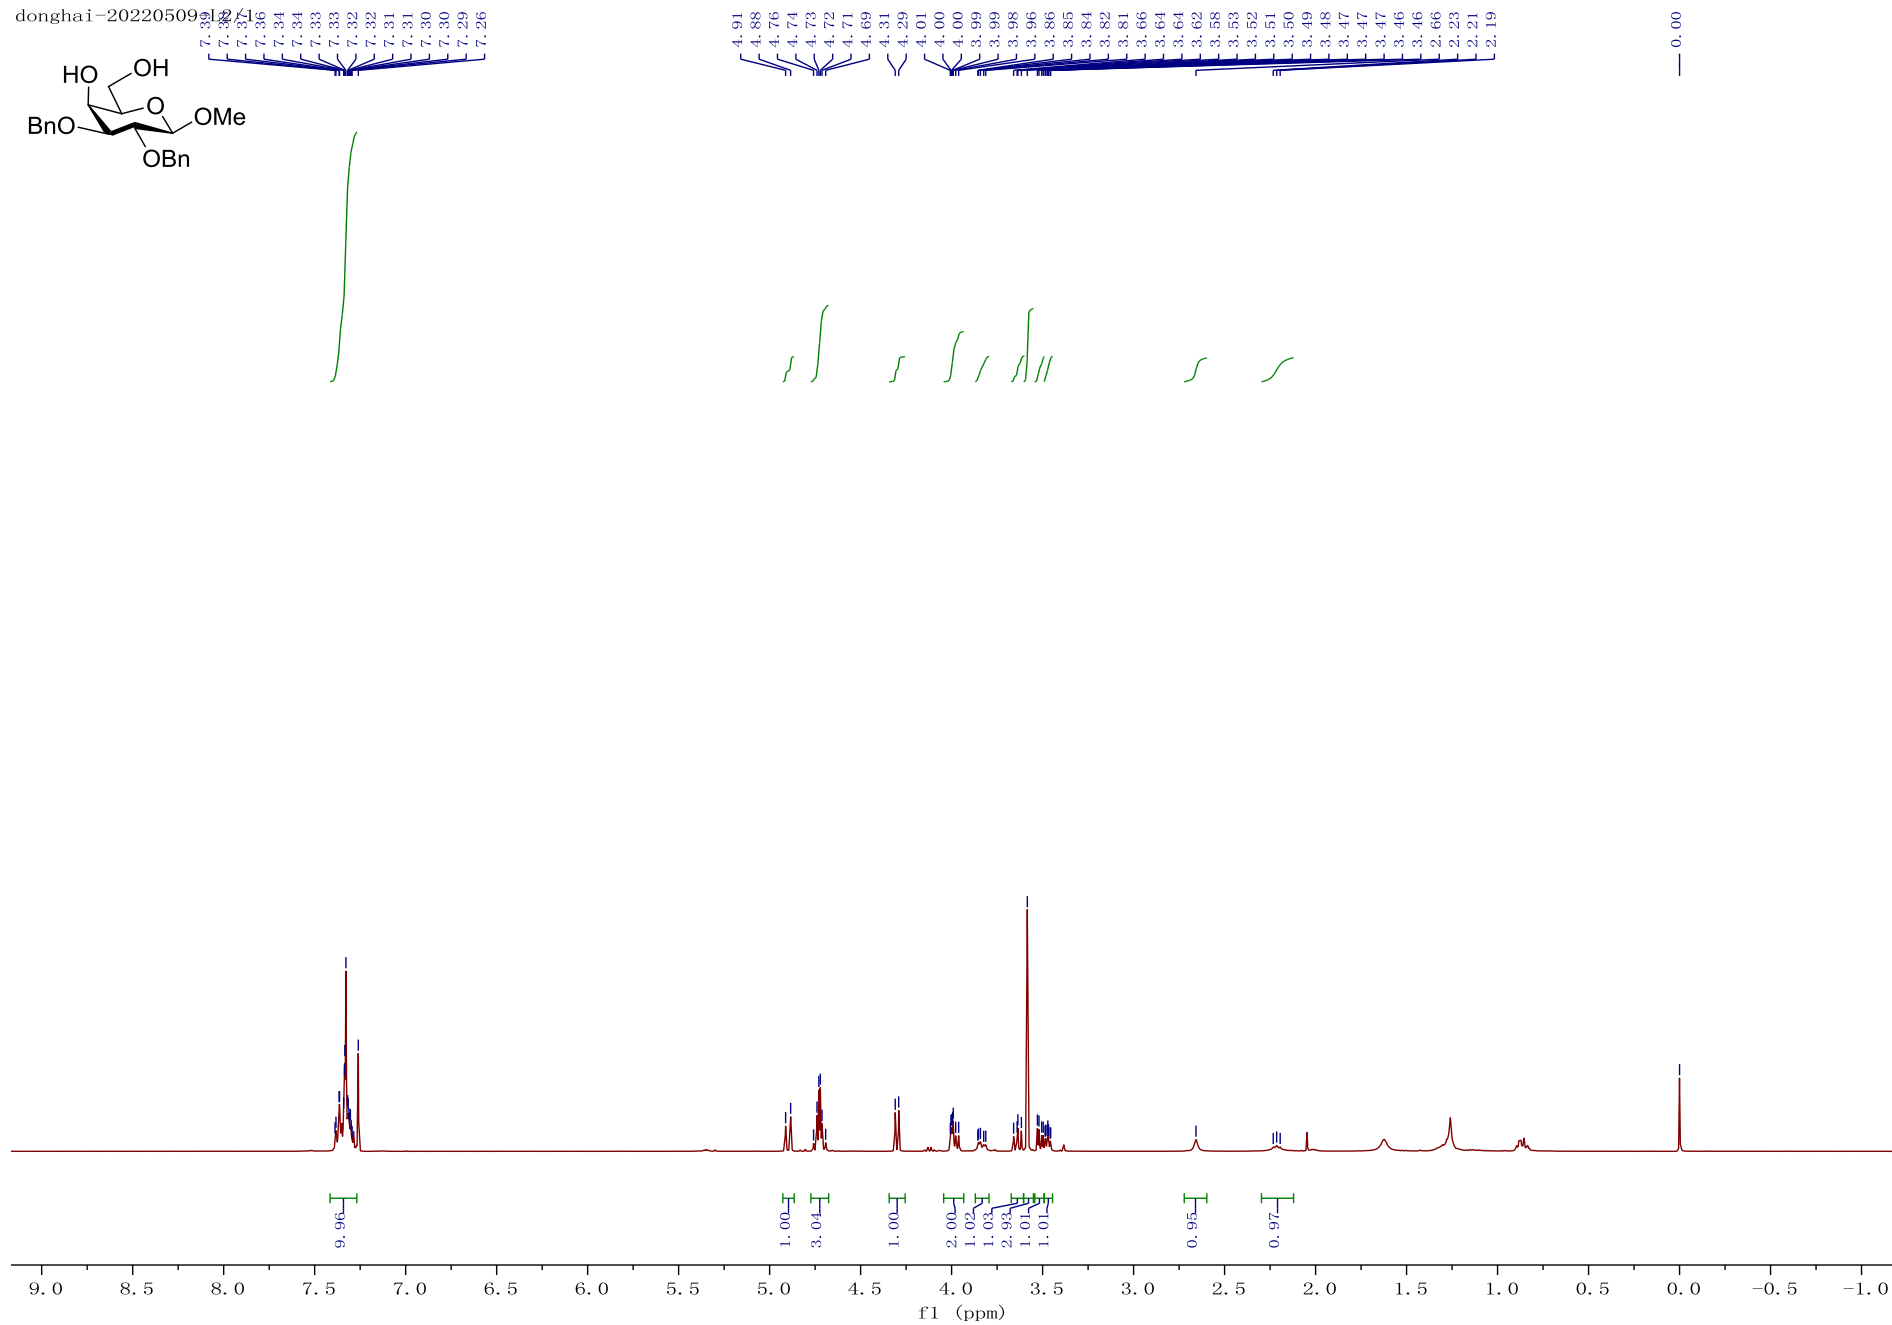



Methyl 2,3-di-O-acetyl-4,6-O-benzylidene- $\alpha$ -D-mannopyranoside 19

20210624-DongH-L-6#14

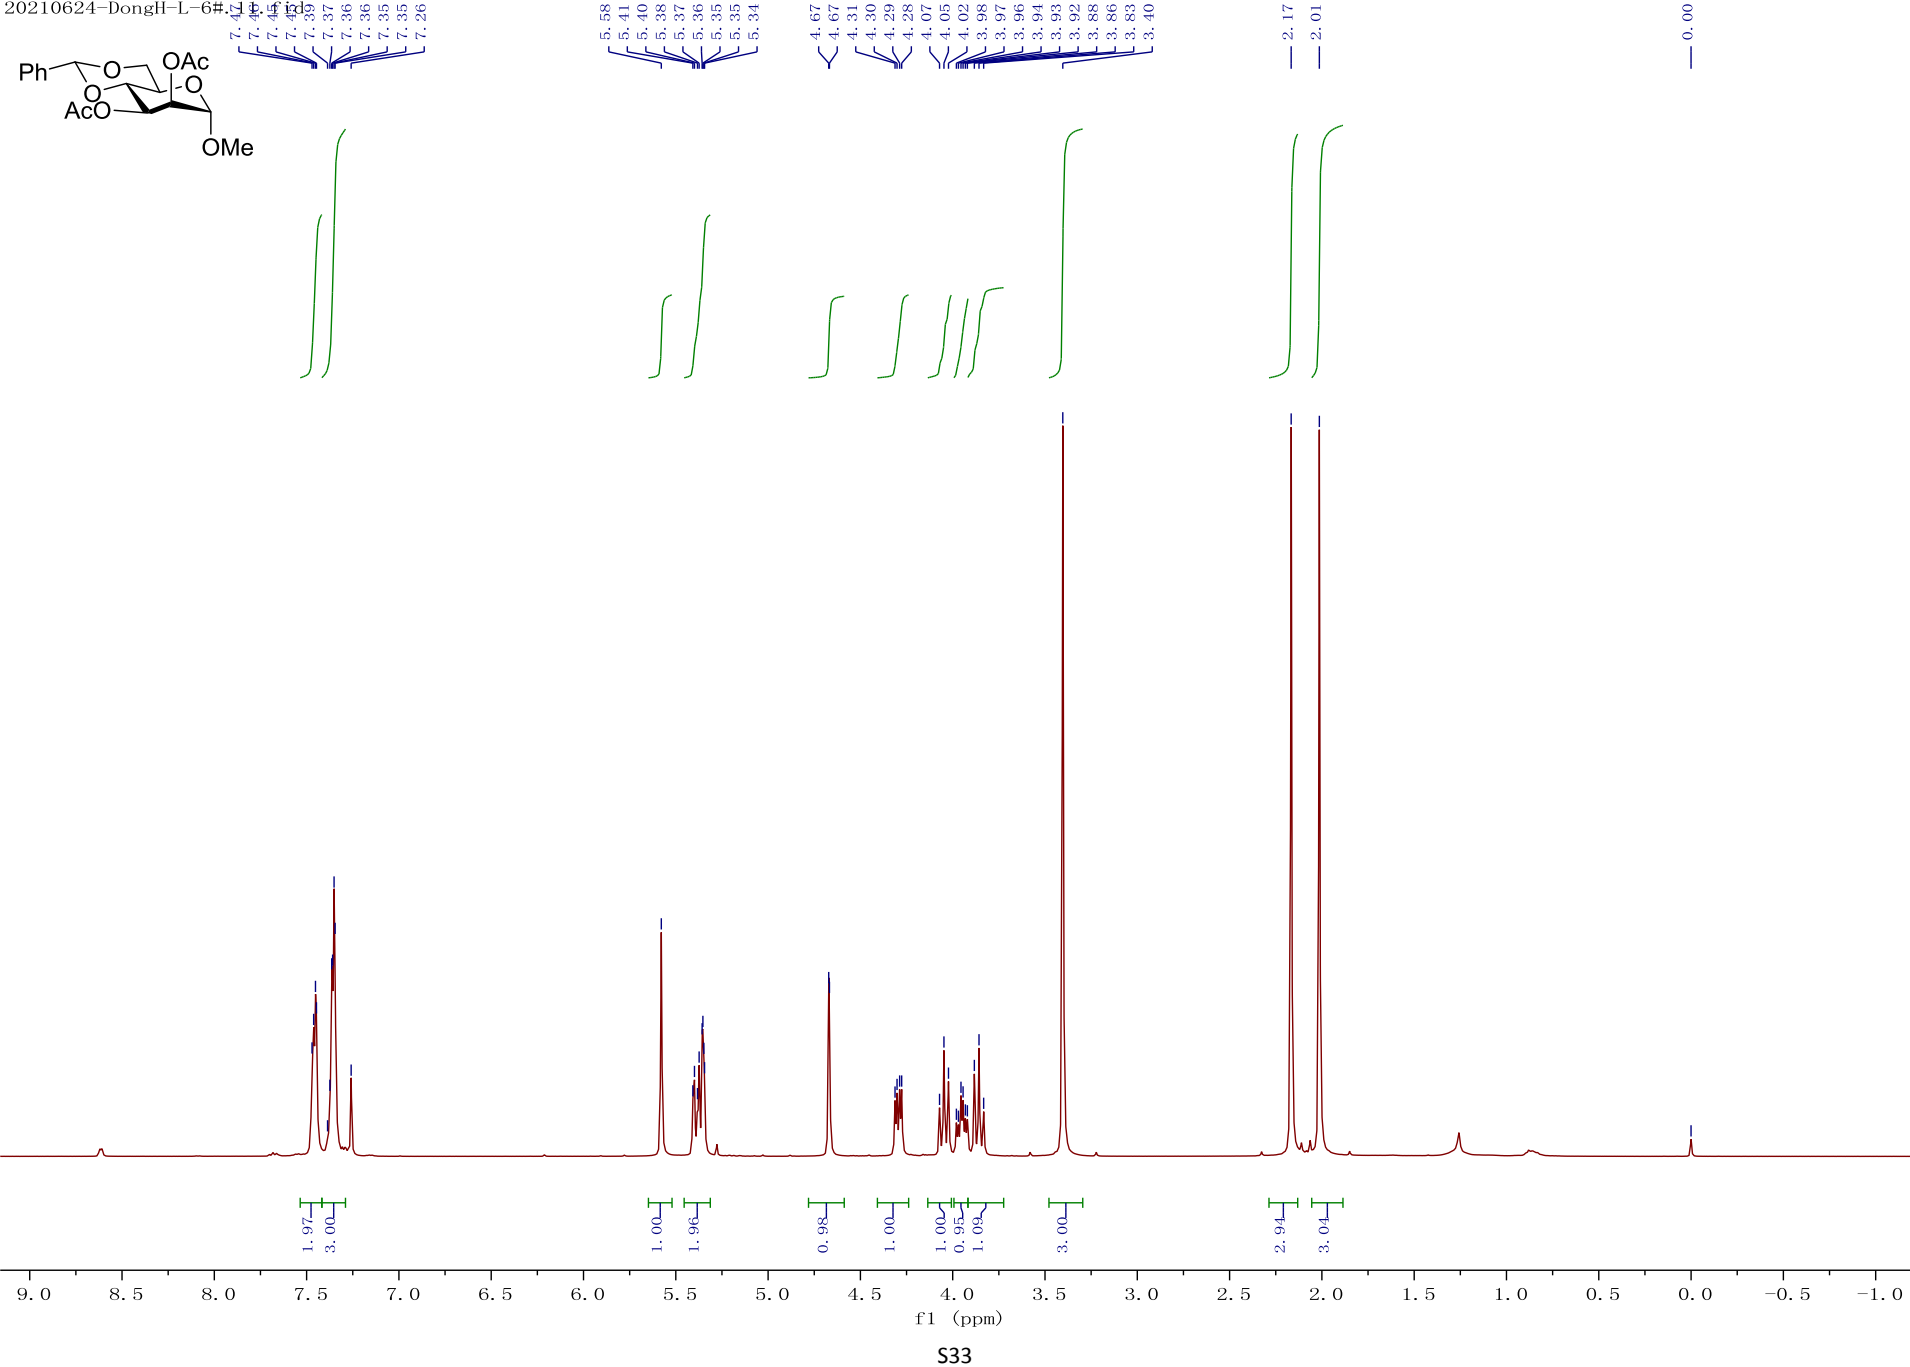

# Methyl 2,3-di-*O*-acetyl- $\alpha$ -D-mannopyranoside 20

donghai20191105-01#/1

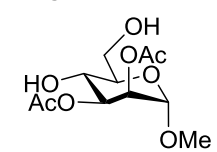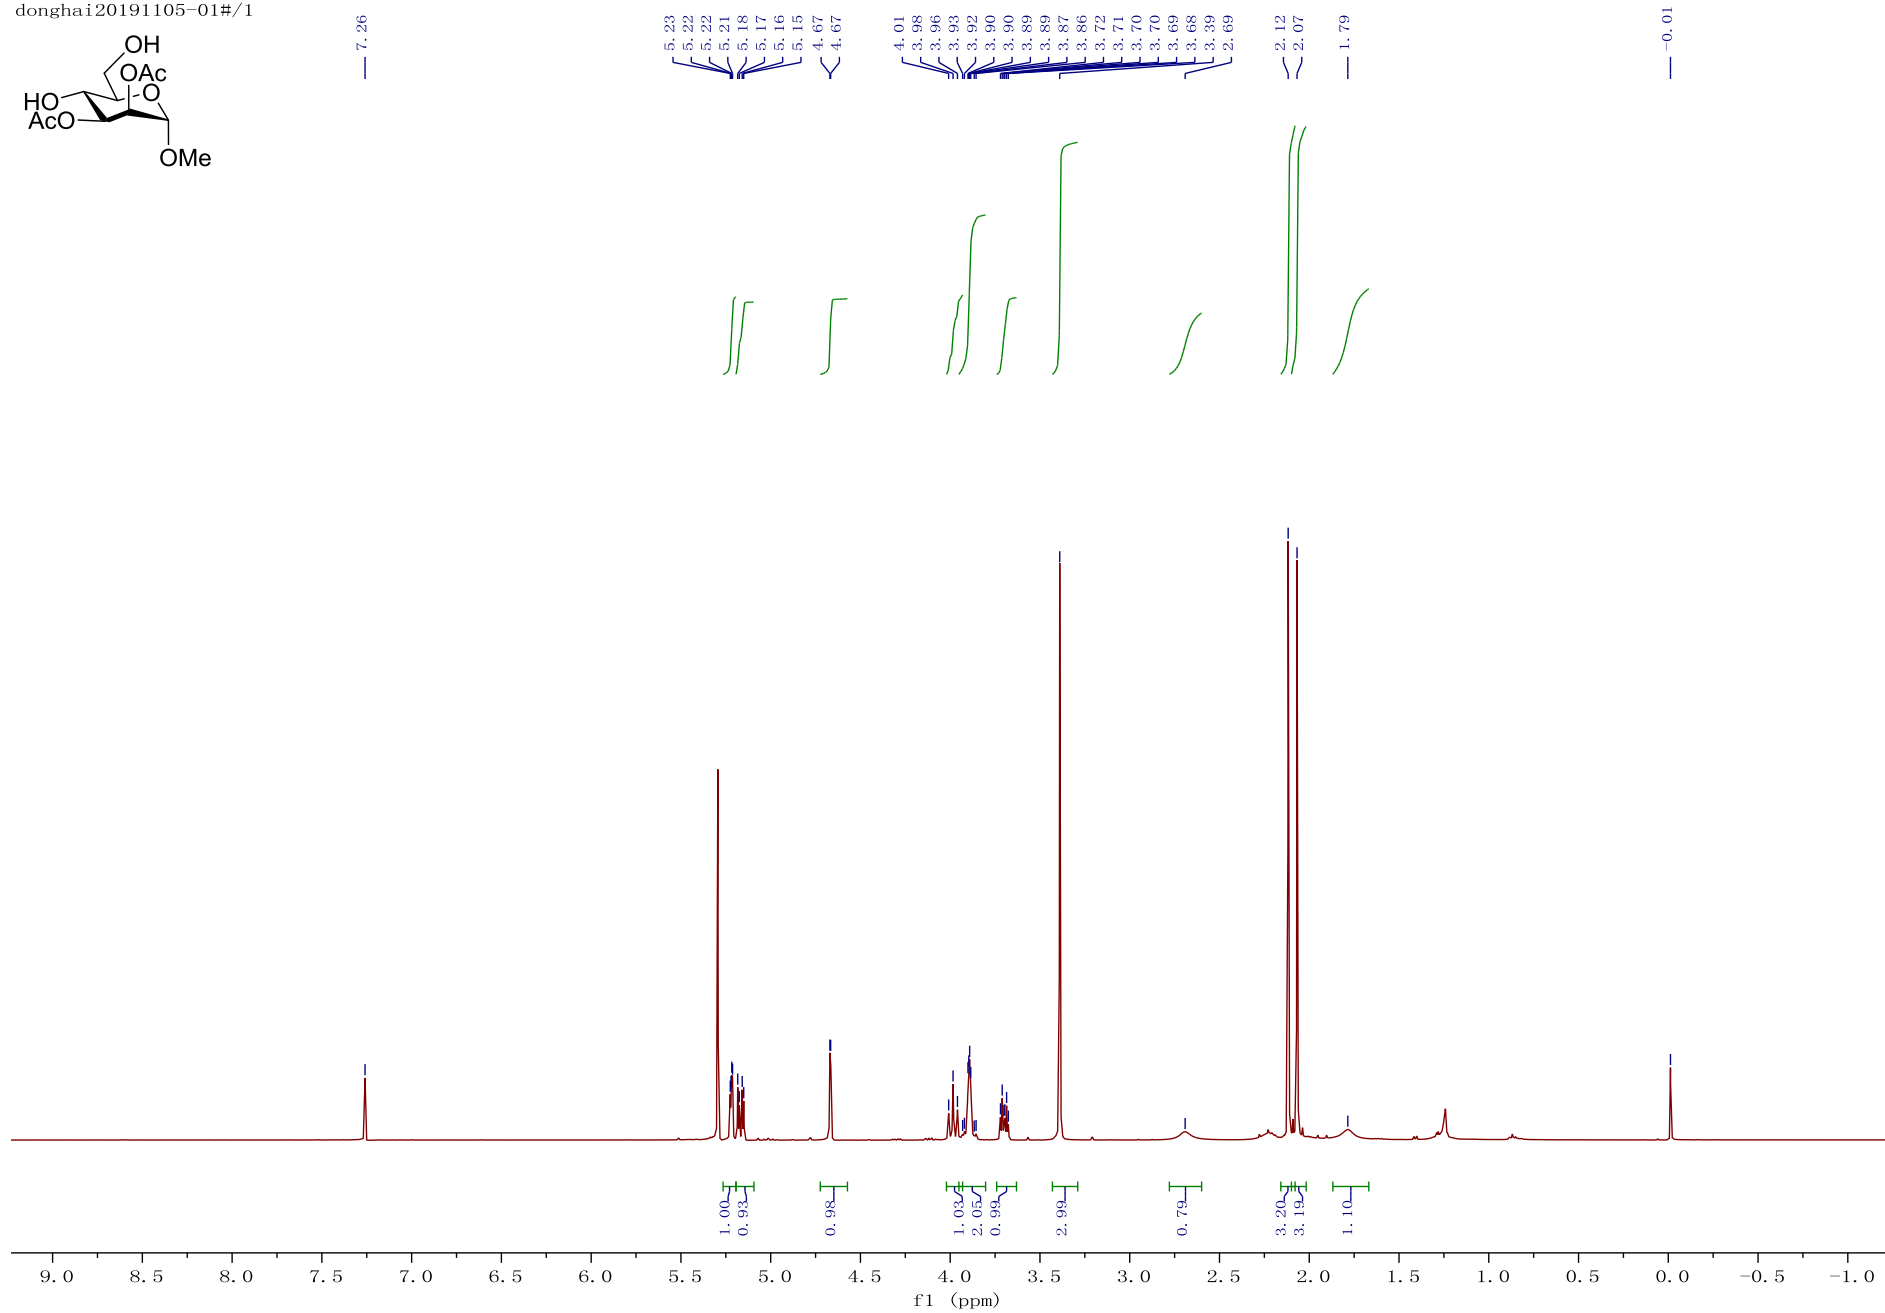

Methyl 2,6-di-O-benzyl 3,4-O-isopropylidene- $\alpha$ -D-galactopyranoside 21

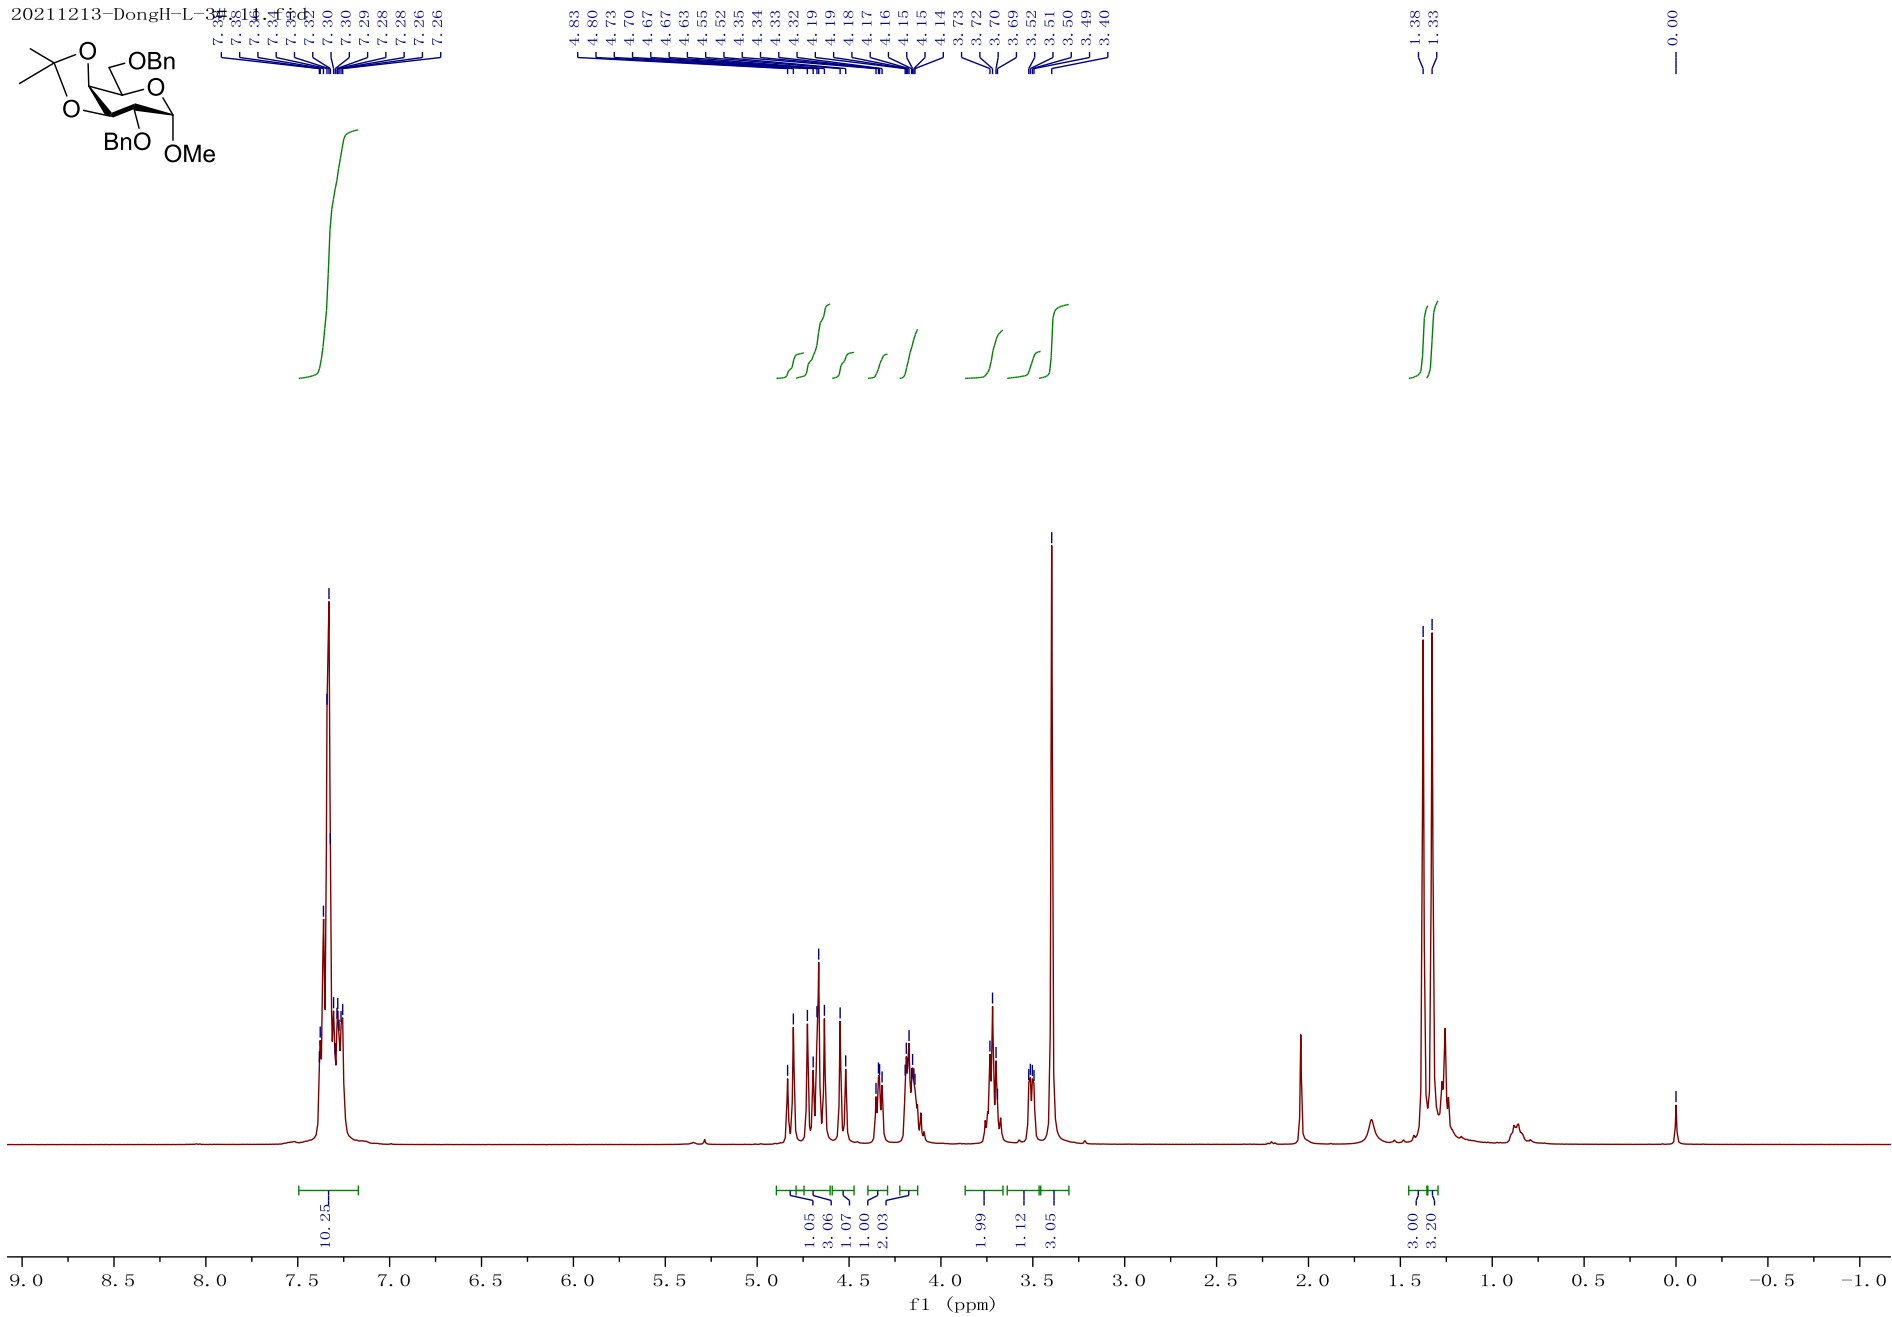

# Methyl 2,6-di-*O*-benzyl- $\alpha$ -D-galactopyranoside 22

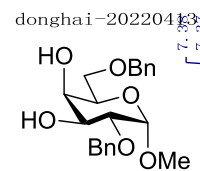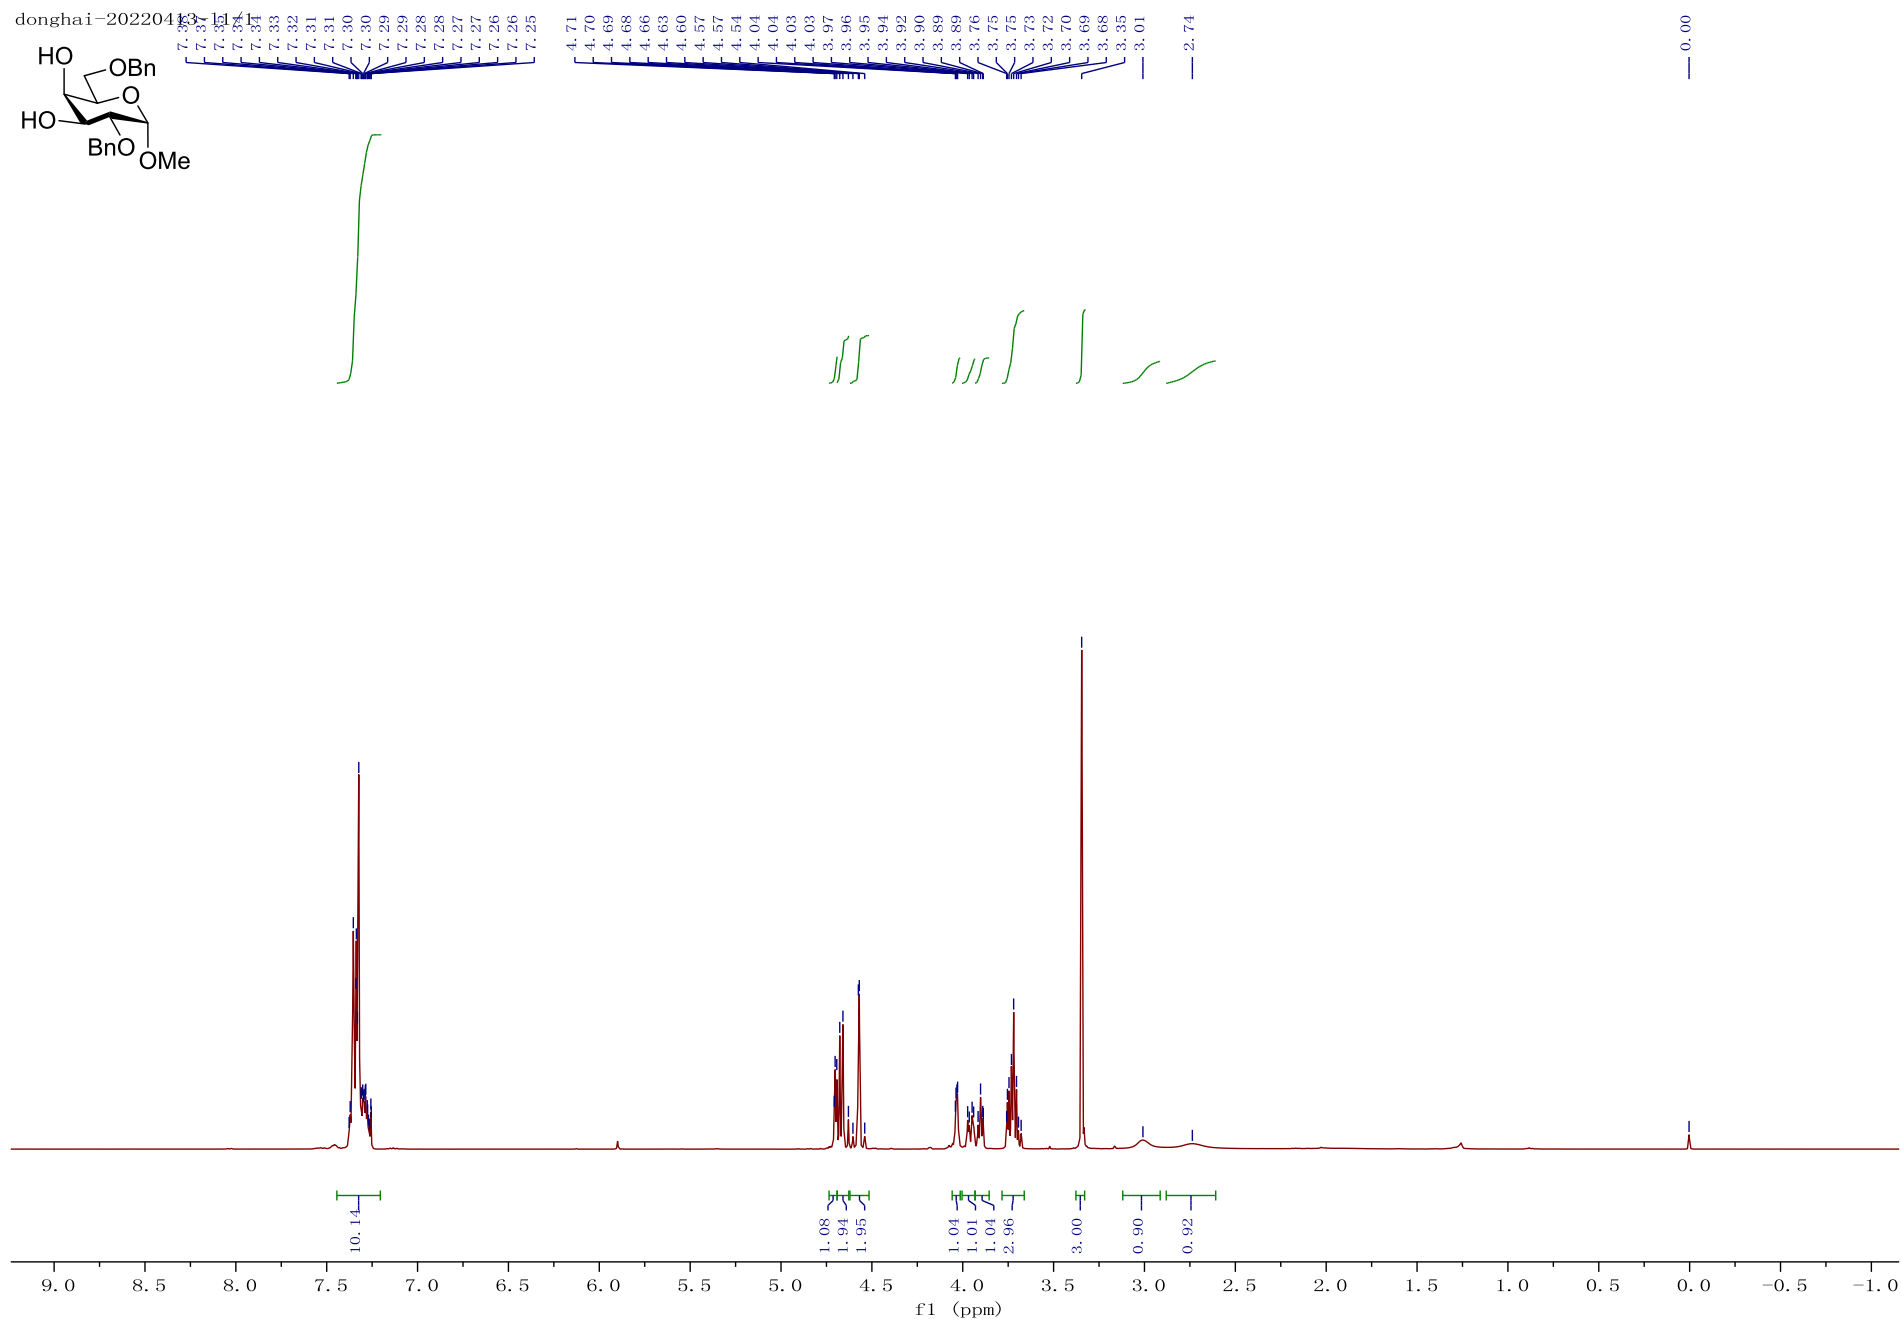

# 1,2:5,6-Di-*O*-isopropylidene-3-*O*-benzoyl- $\alpha$ -D-glucufuranose **23**

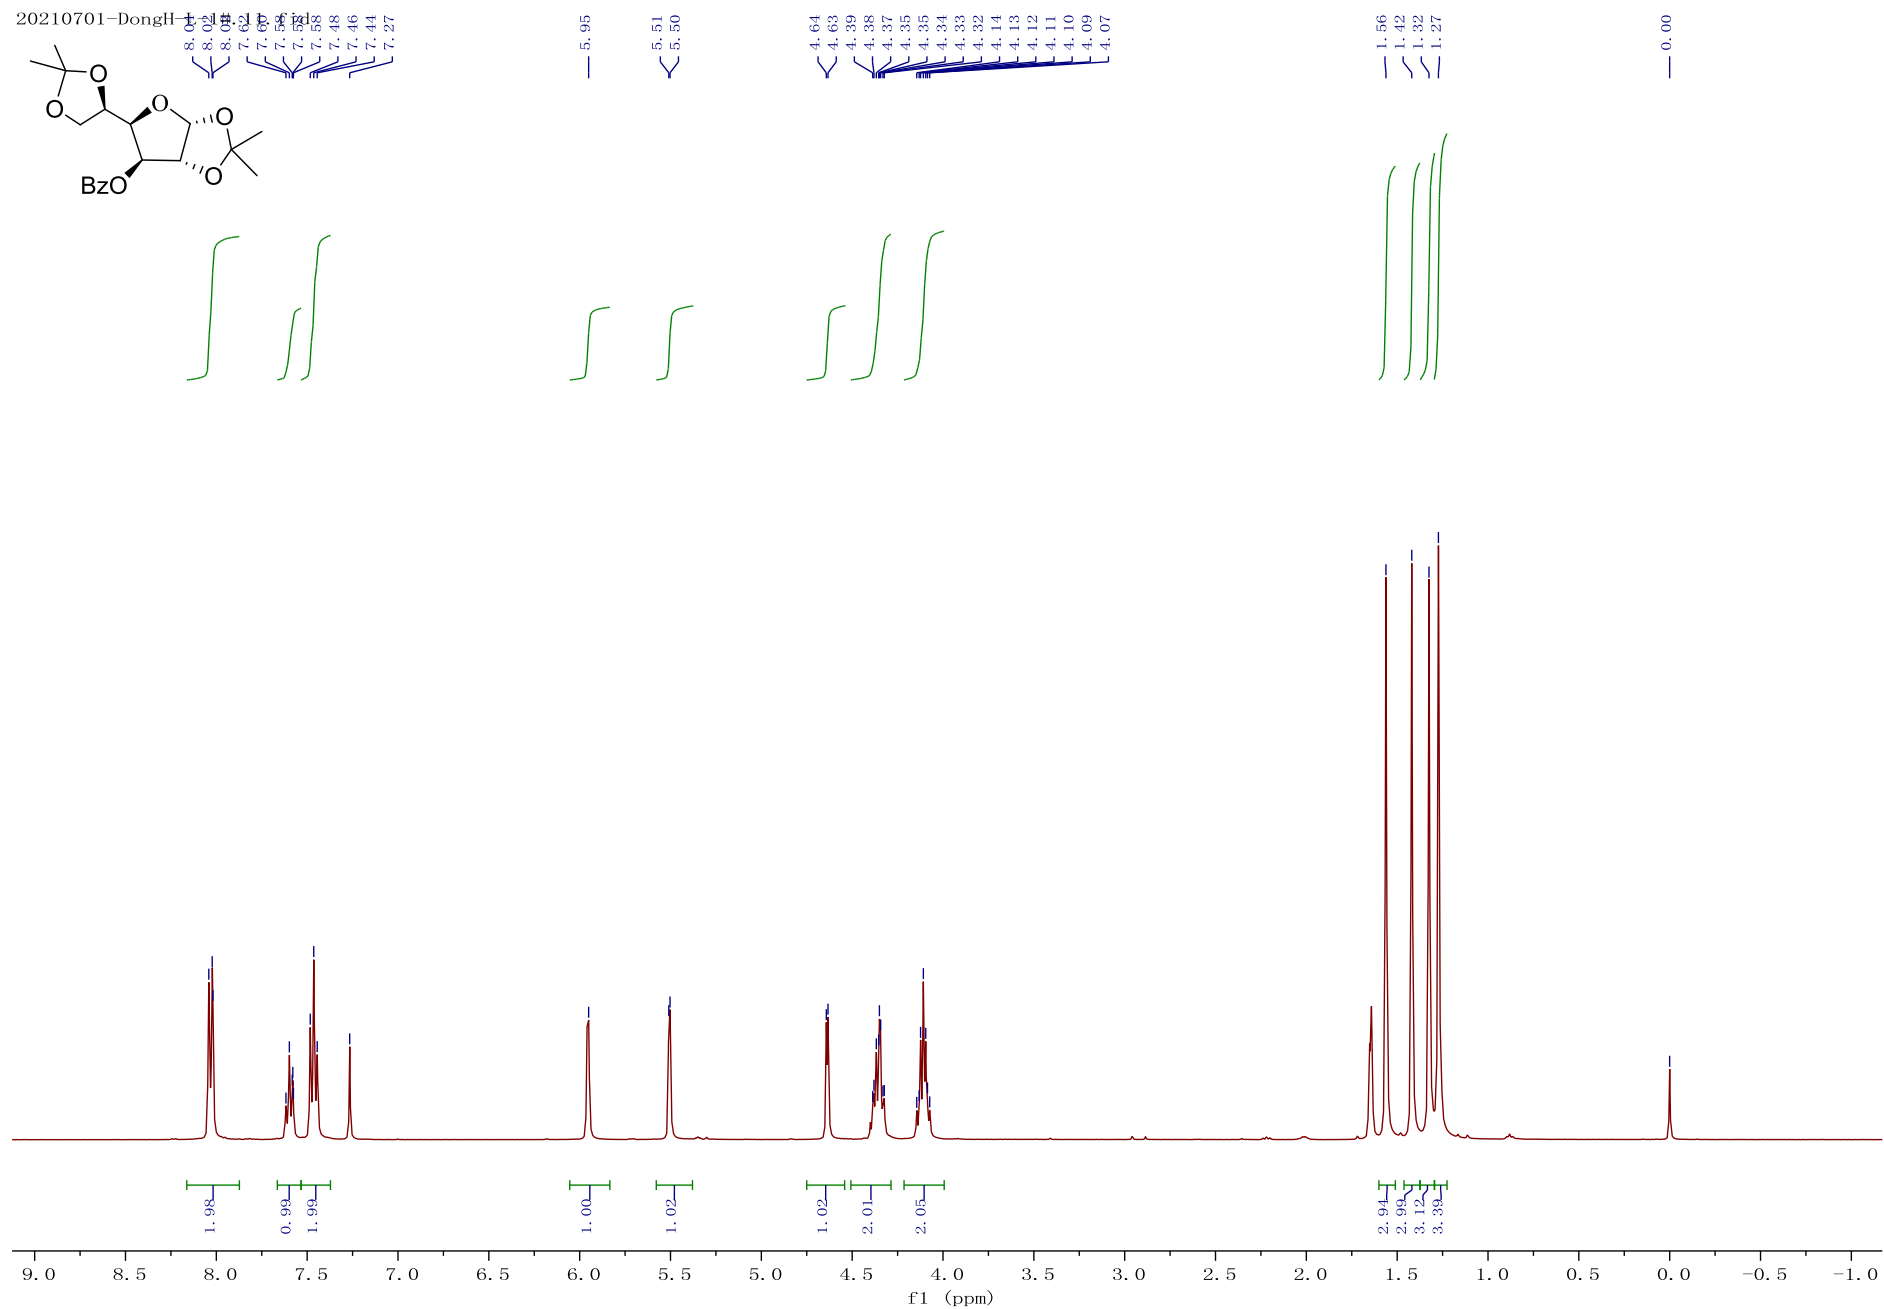

# **3-*O*-Benzoyl-1,2-*O*-isopropylidene- $\alpha$ -D-glucofuranose 24**

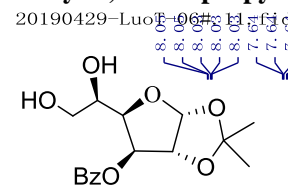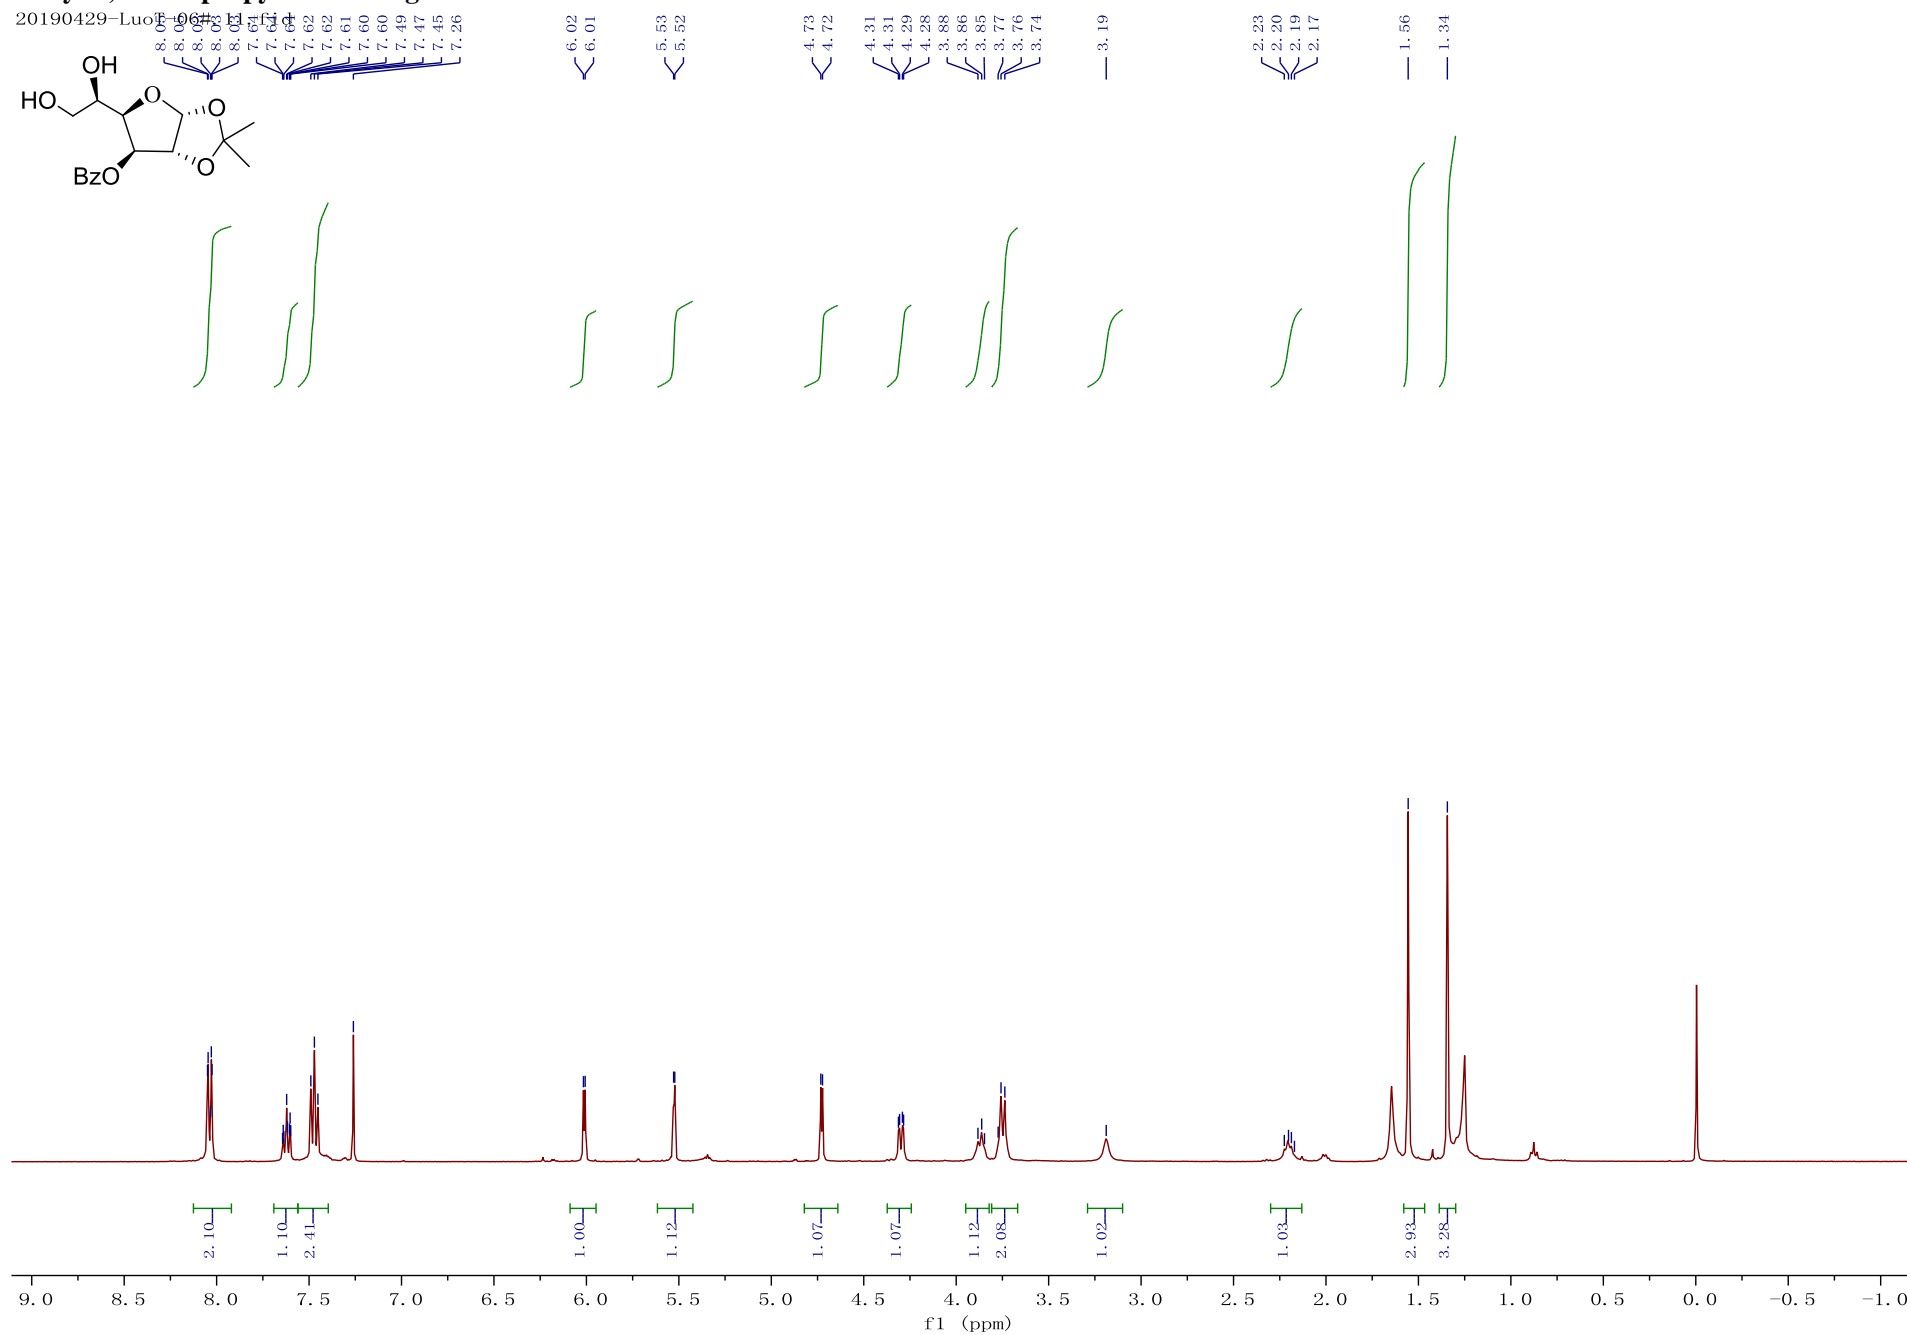

### 1,2:5,6-Di-*O*-isopropylidene-3-*O*-benzyl- $\alpha$ -D-glucofuranose 25

20210629-DongH-L-3#. 11.

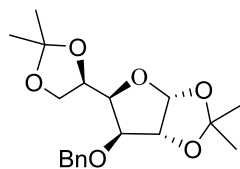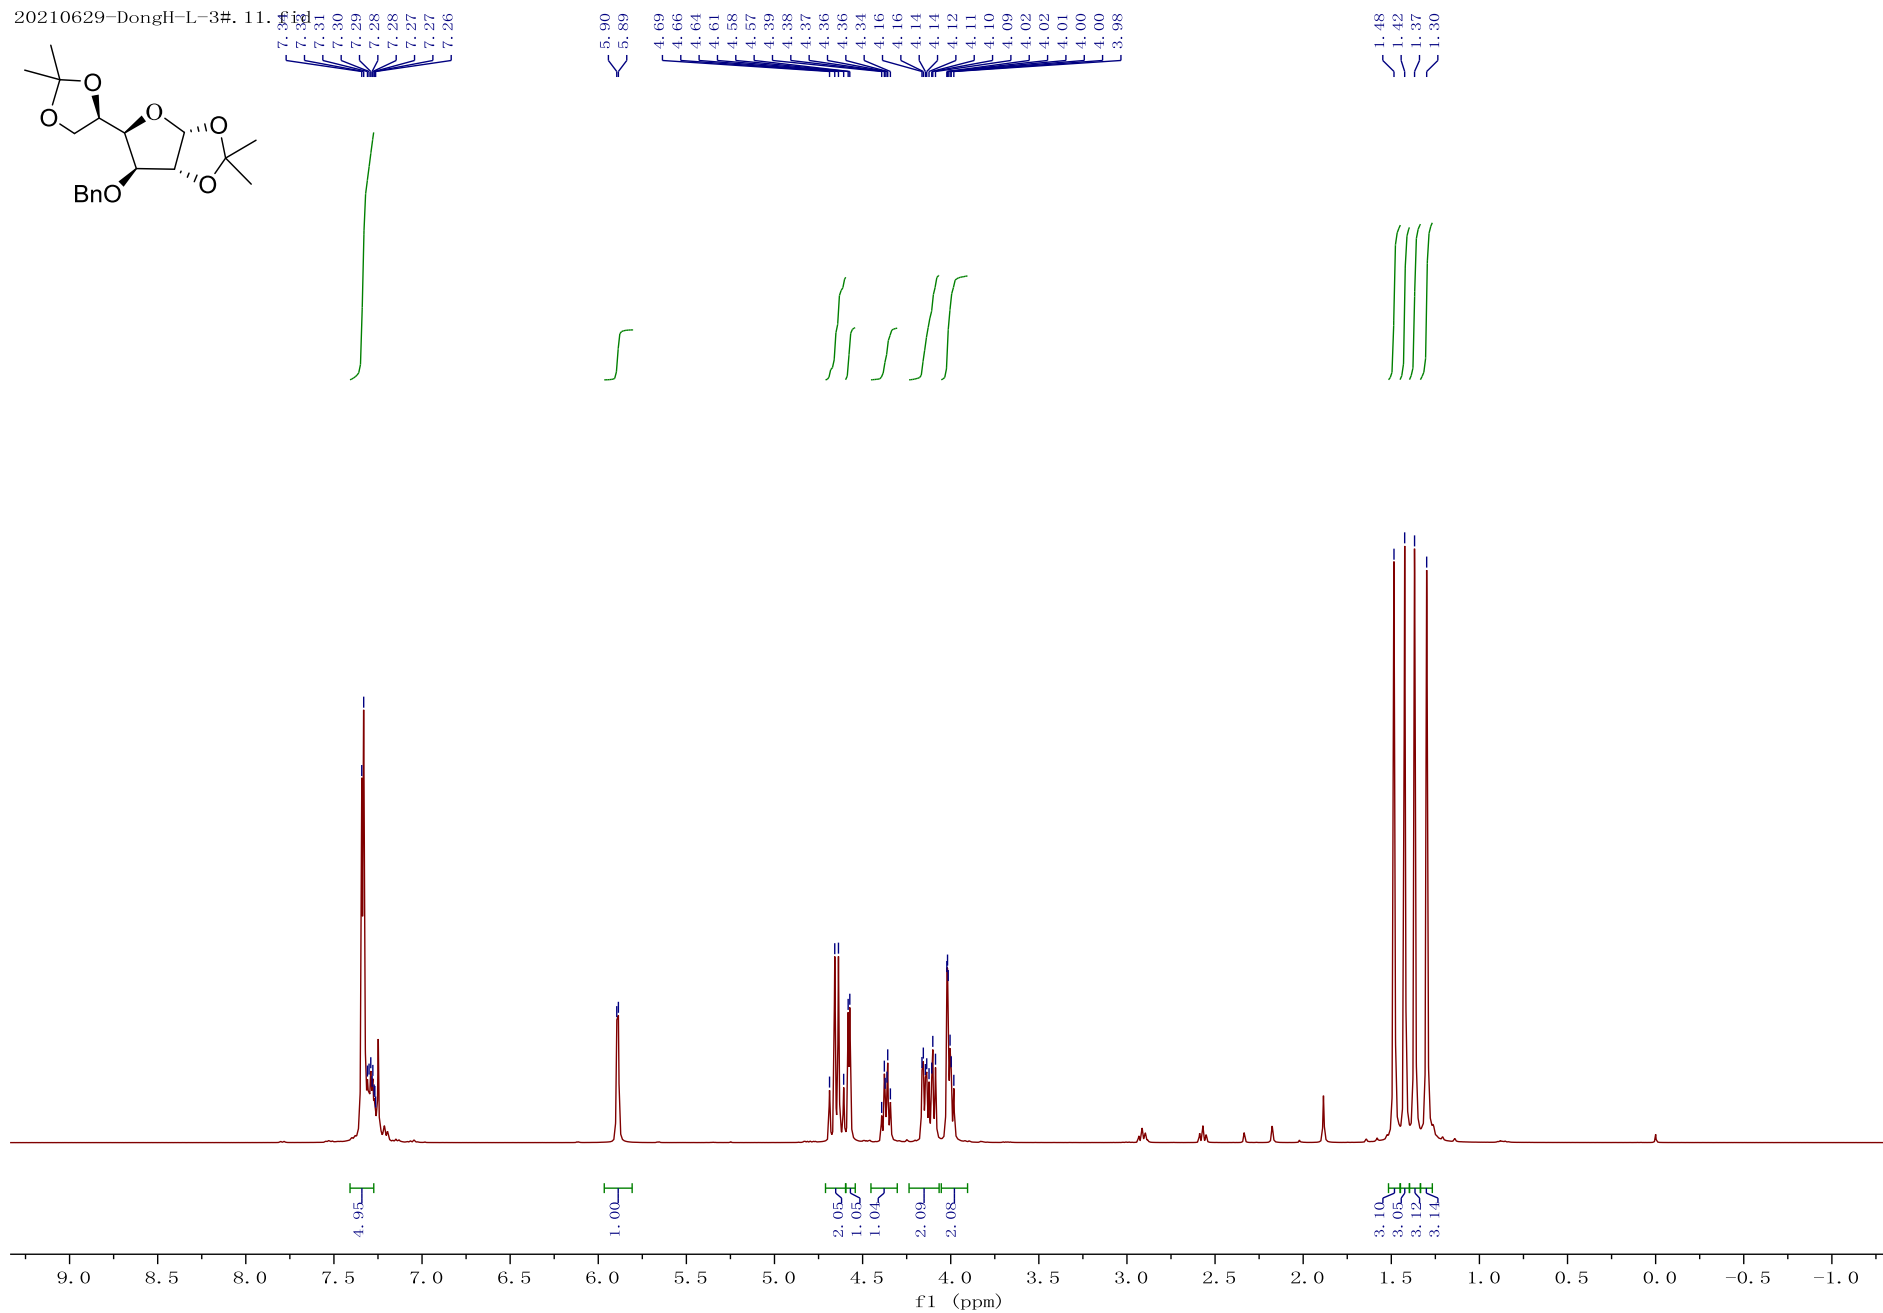

3-O-Benzyl-1,2-O-isopropylidene- $\alpha$ -D-glucofuranose 26

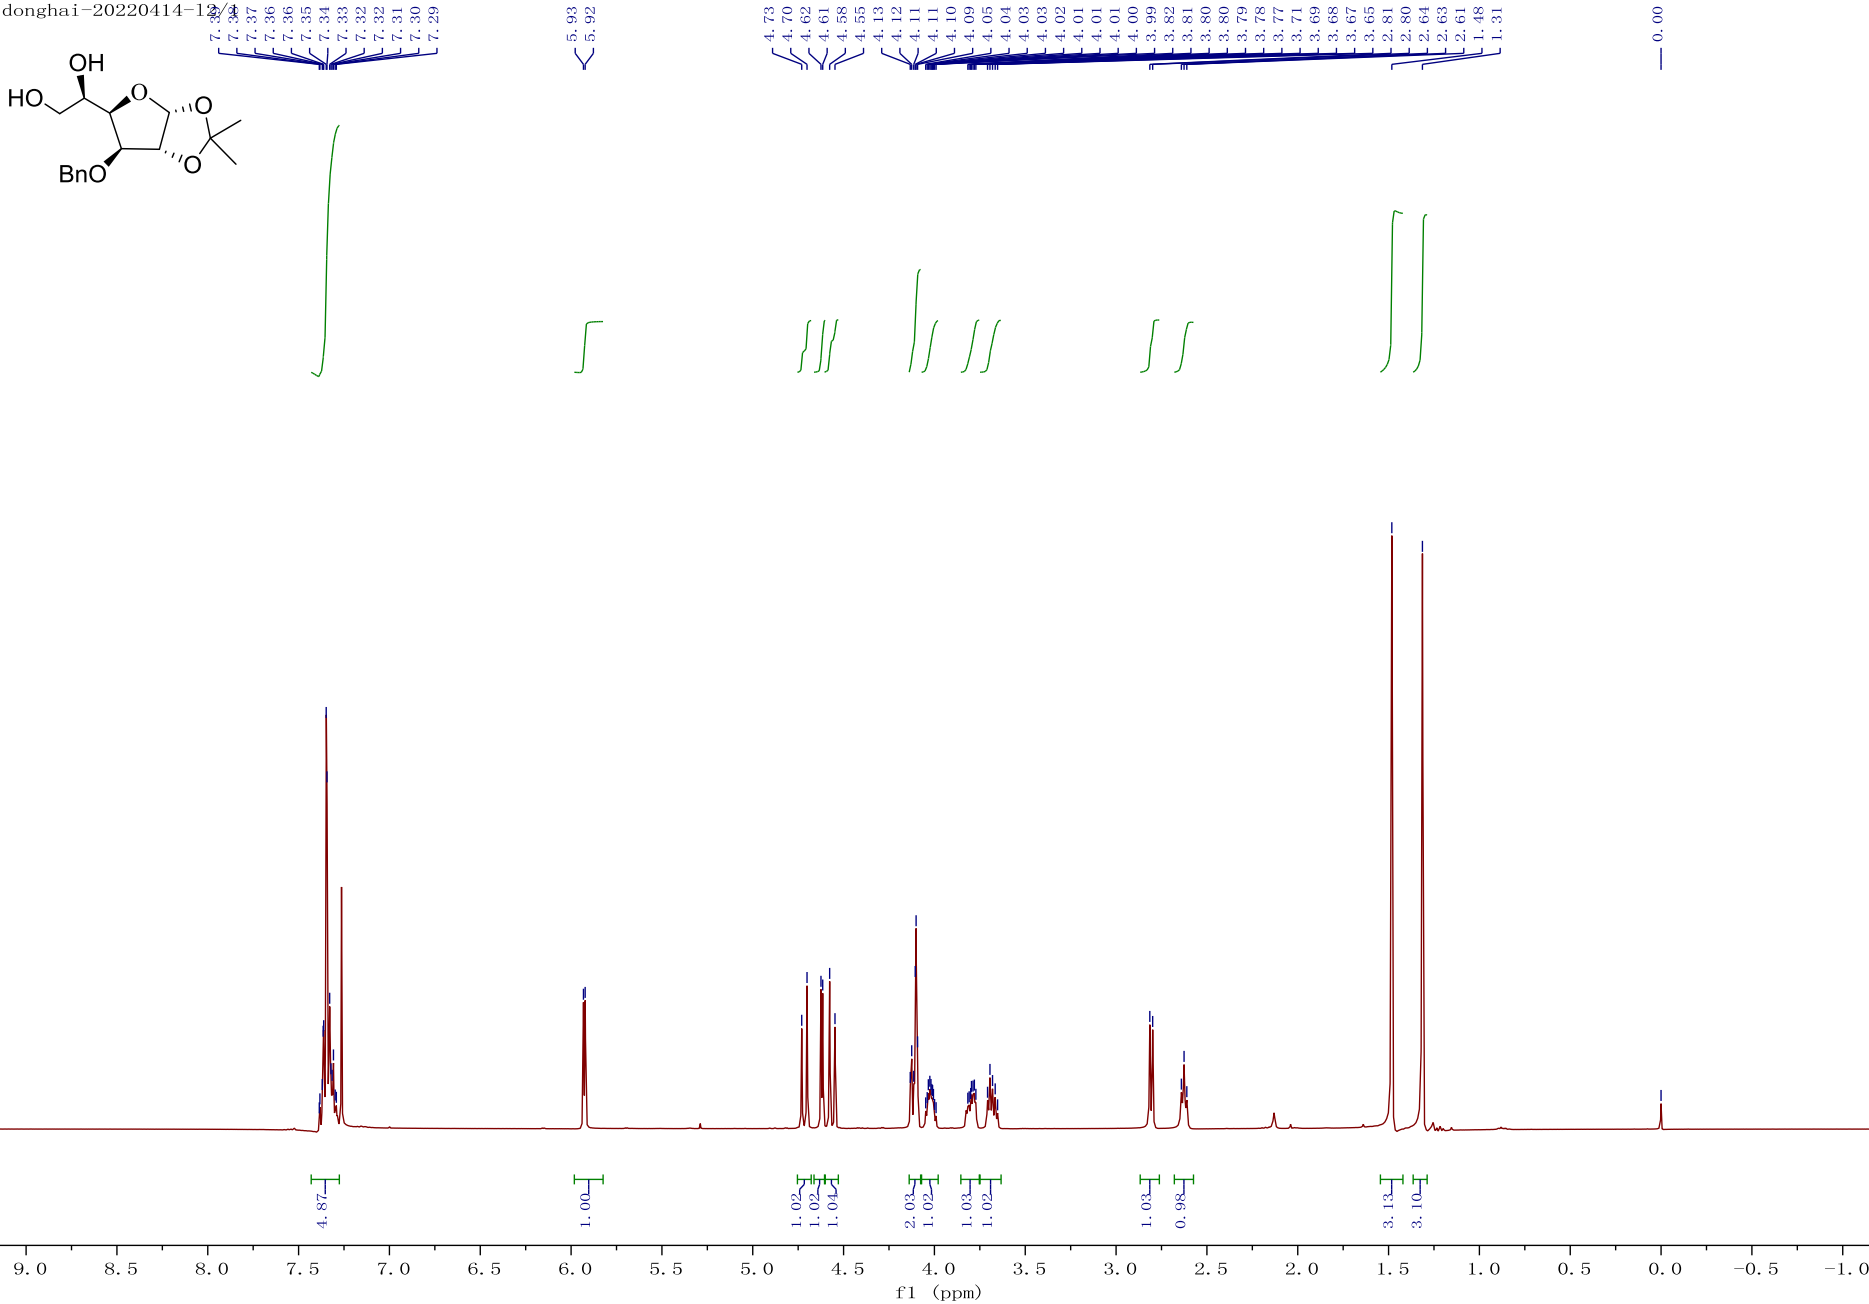



# Methyl 2,4,6-tri-*O*-acetyl-3-*O*-(*p*-methoxybenzyl)- $\beta$ -D-galactopyranoside 27

donghai-20220517-L1/1

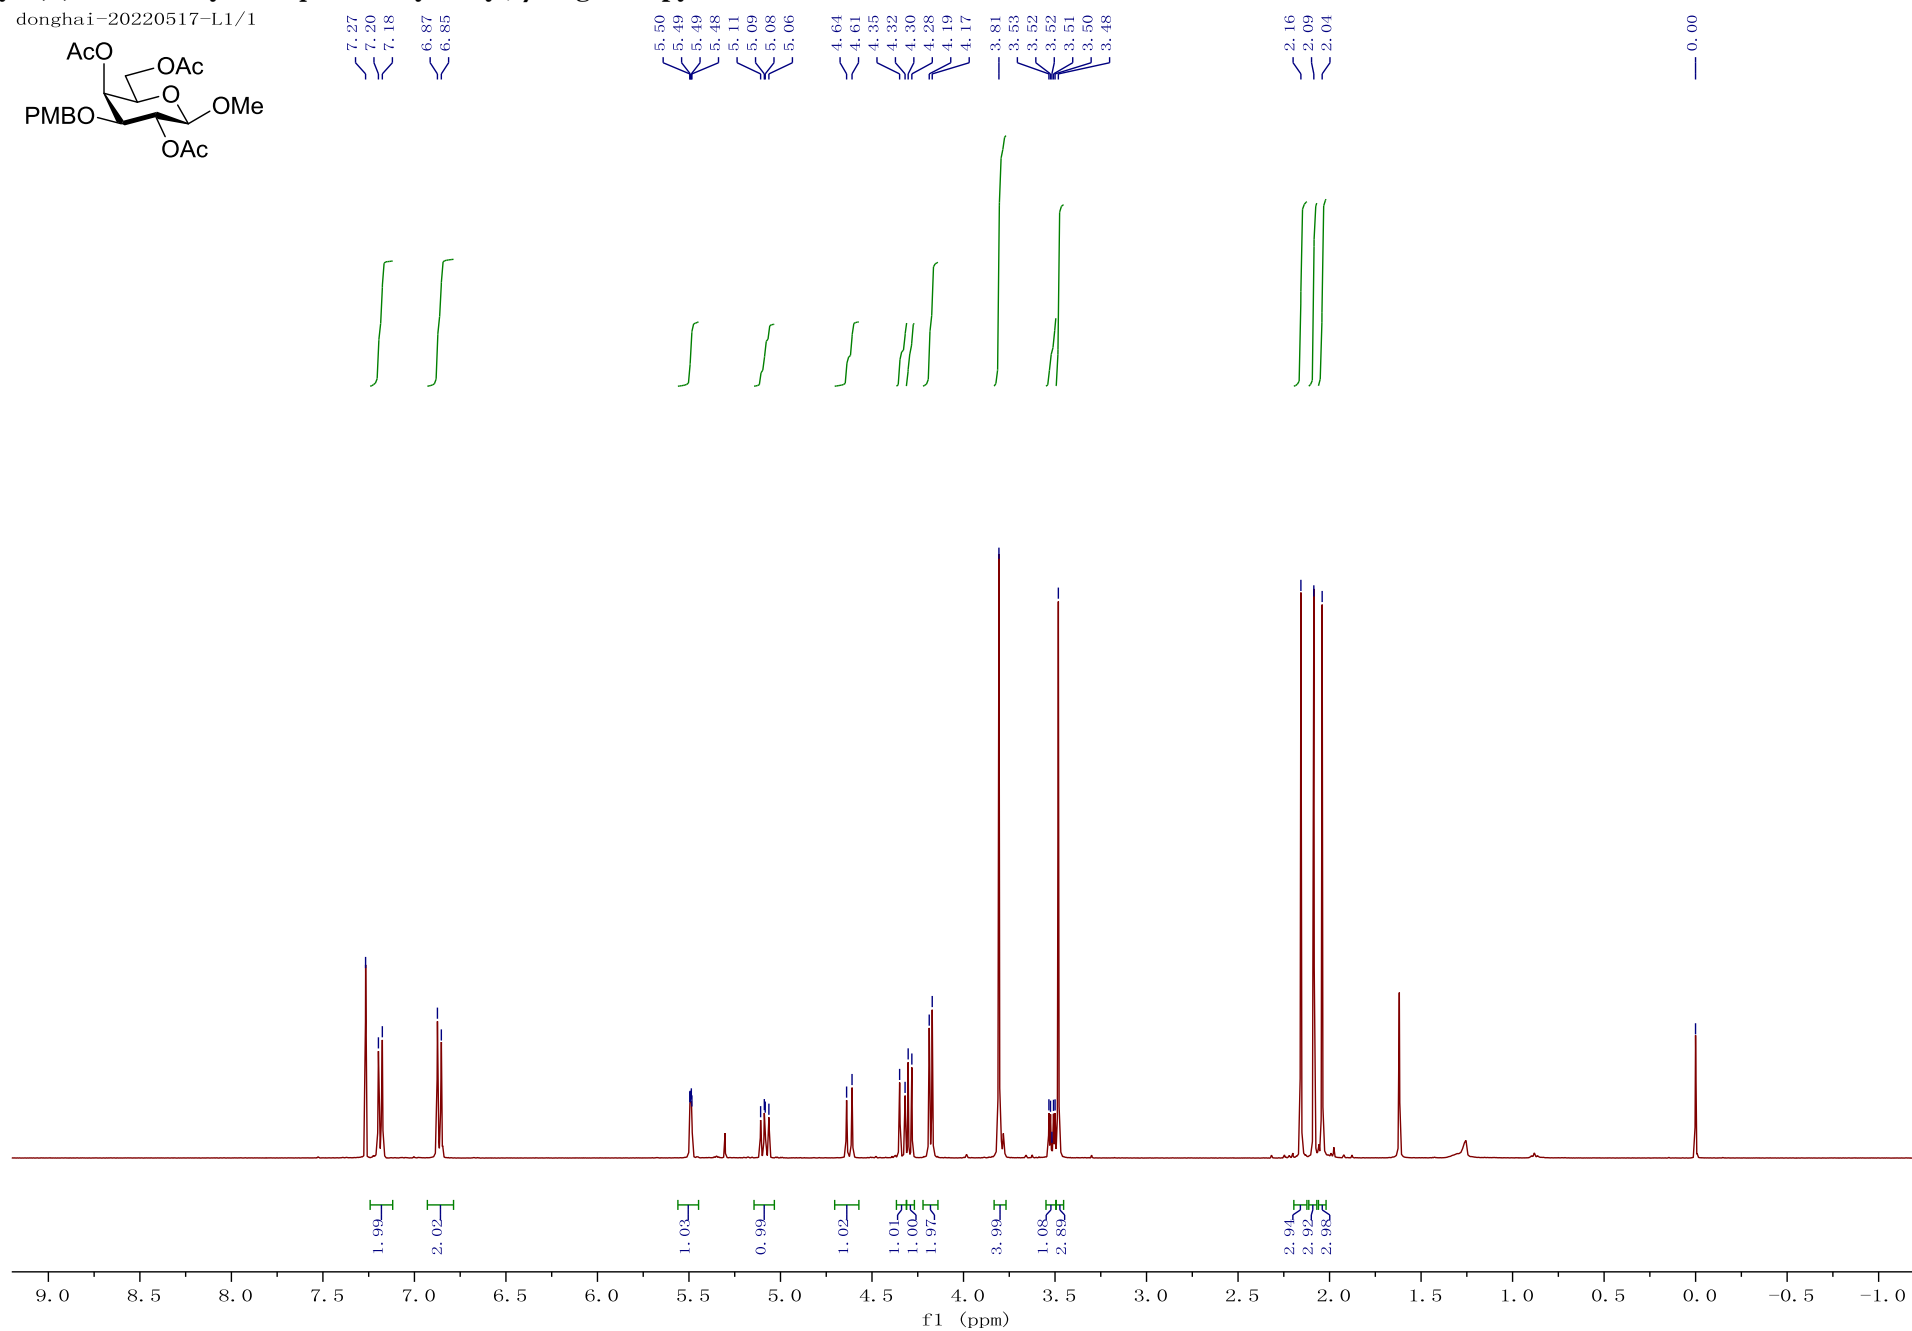

Methyl 2,4,6-tri-*O*-acetyl-3-*O*-(*p*-methoxybenzyl)- $\beta$ -D-galactopyranoside **27**

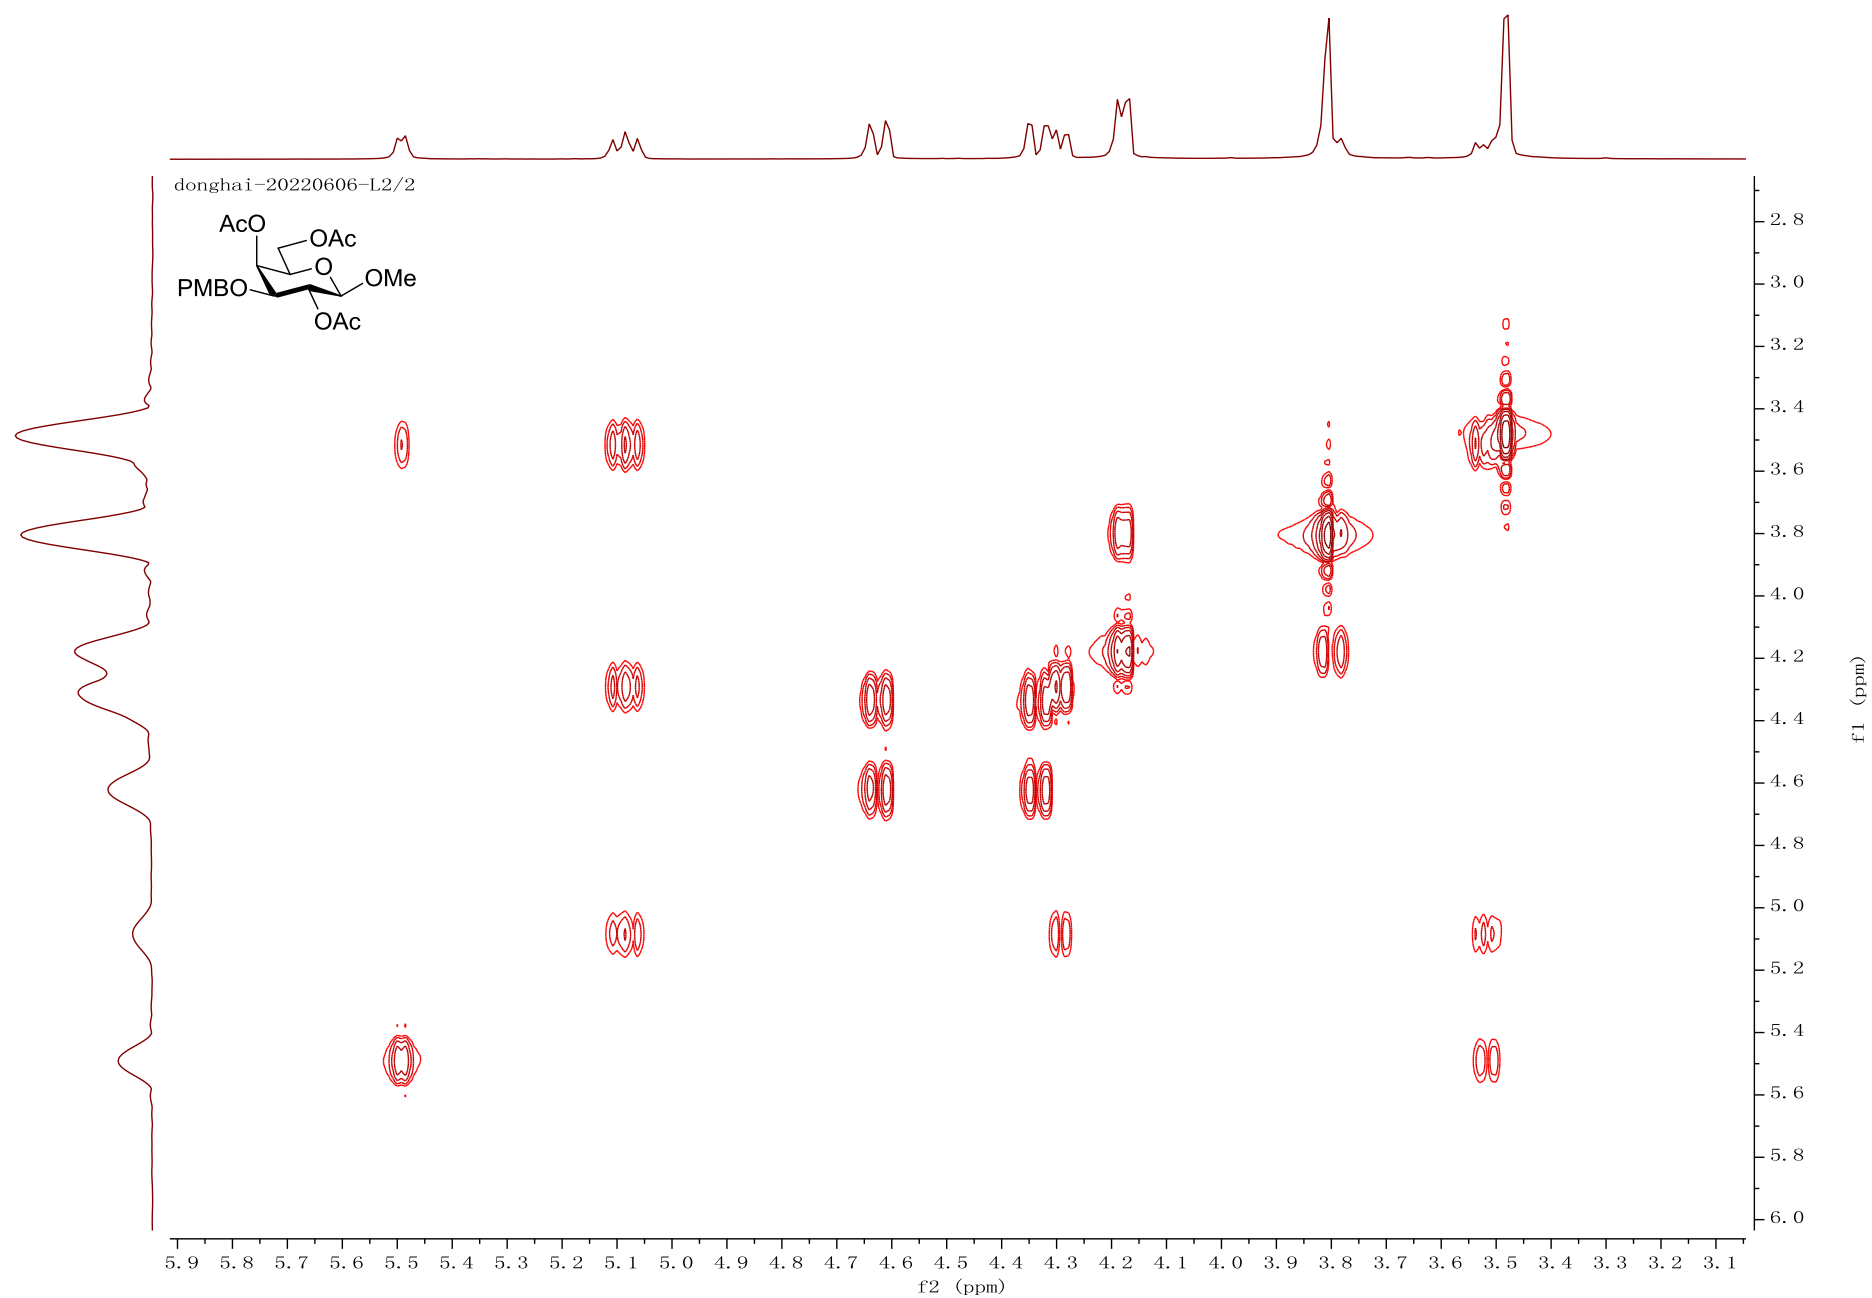

# Methyl 2,4,6-tri-*O*-acetyl-3-*O*-(*p*-methoxybenzyl)- $\beta$ -D-galactopyranoside 27

donghai-20220606-15223

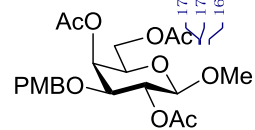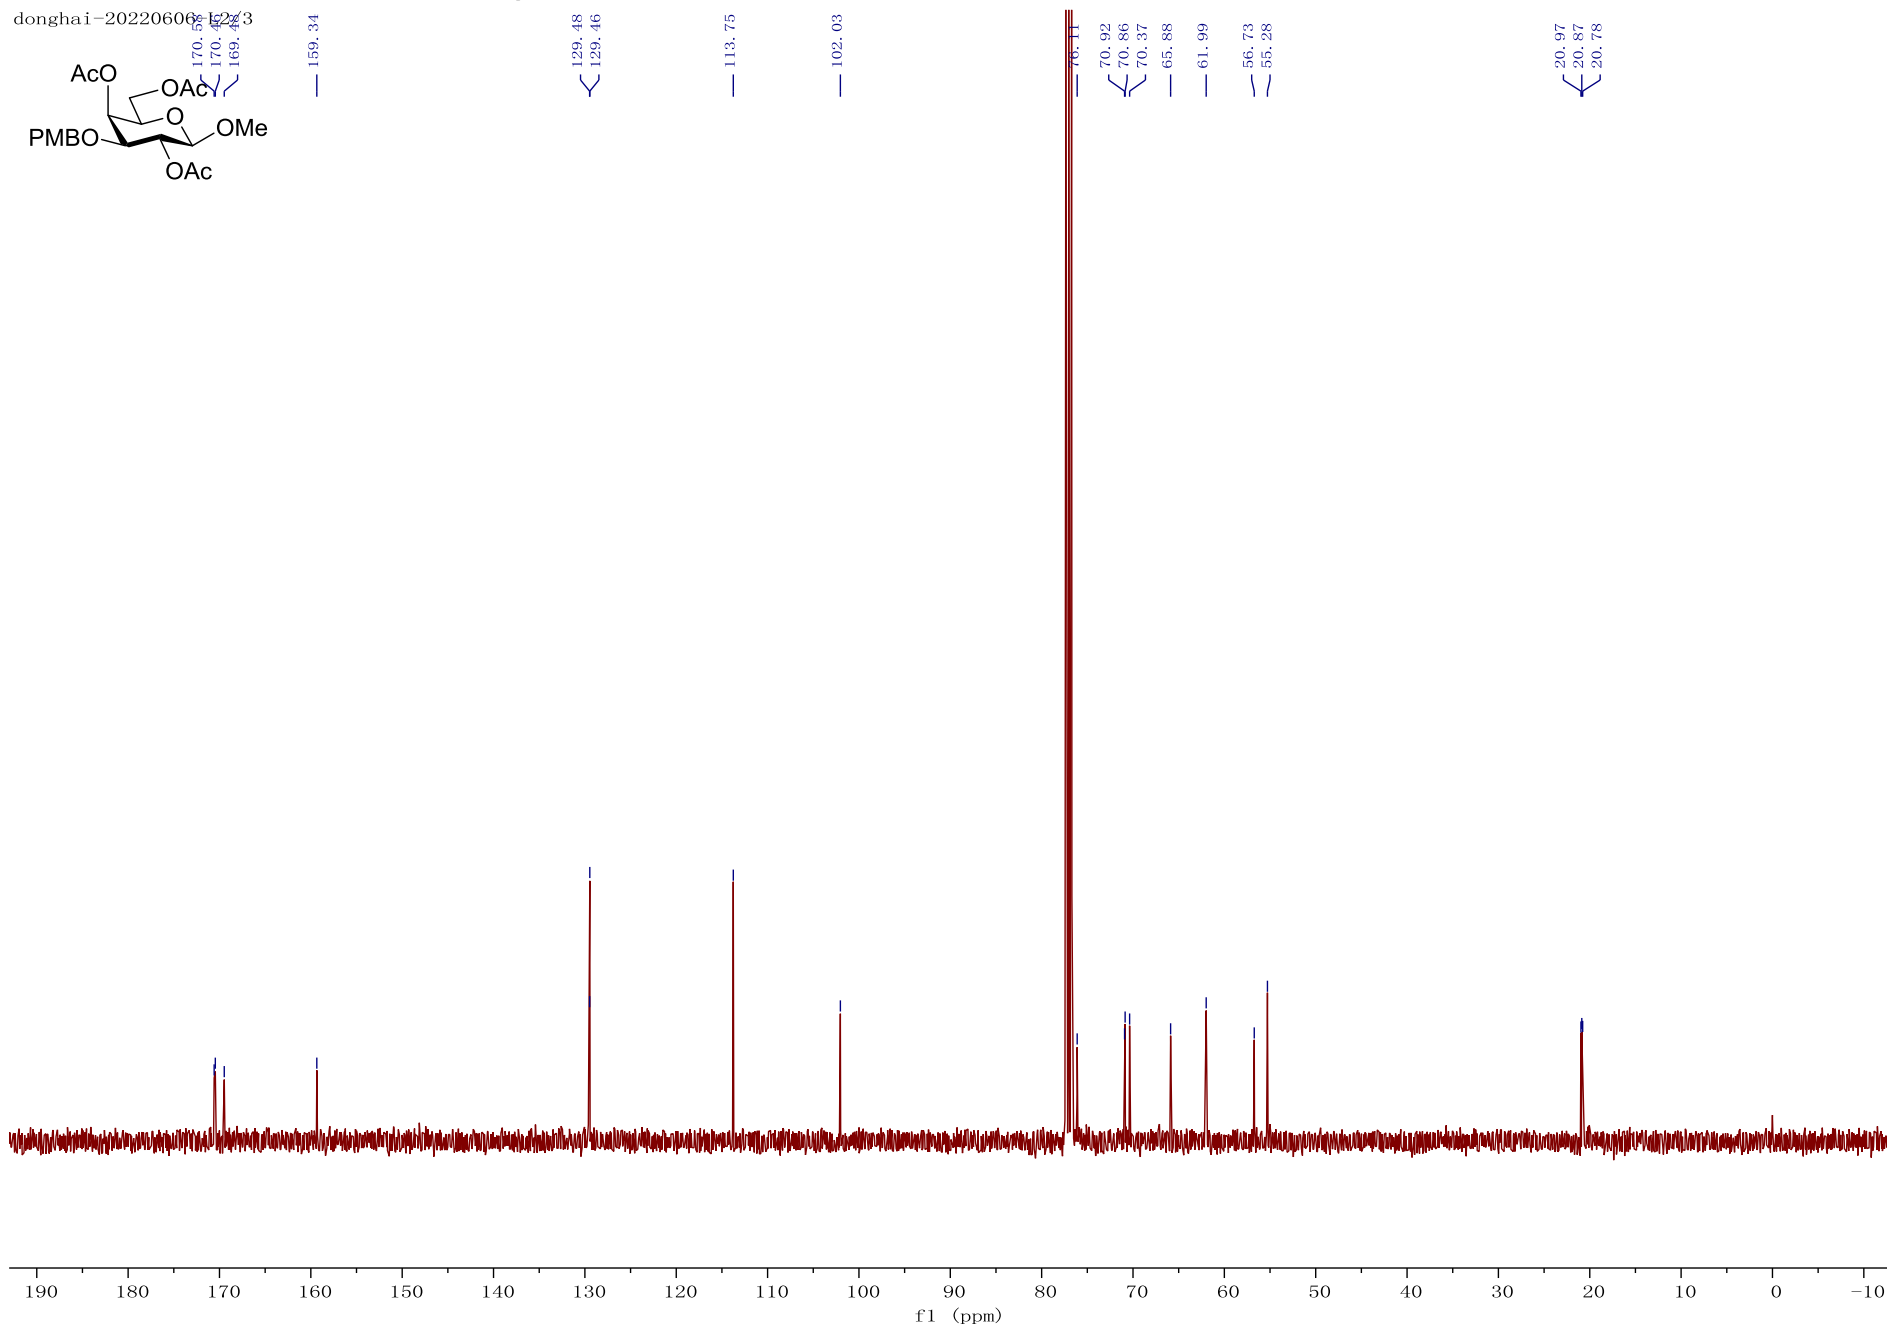

Methyl 2,4,6-tri-*O*-acetyl- $\beta$ -D-galactopyranoside 28

donghai-20220617-L1/1

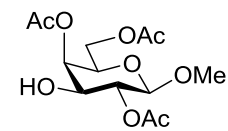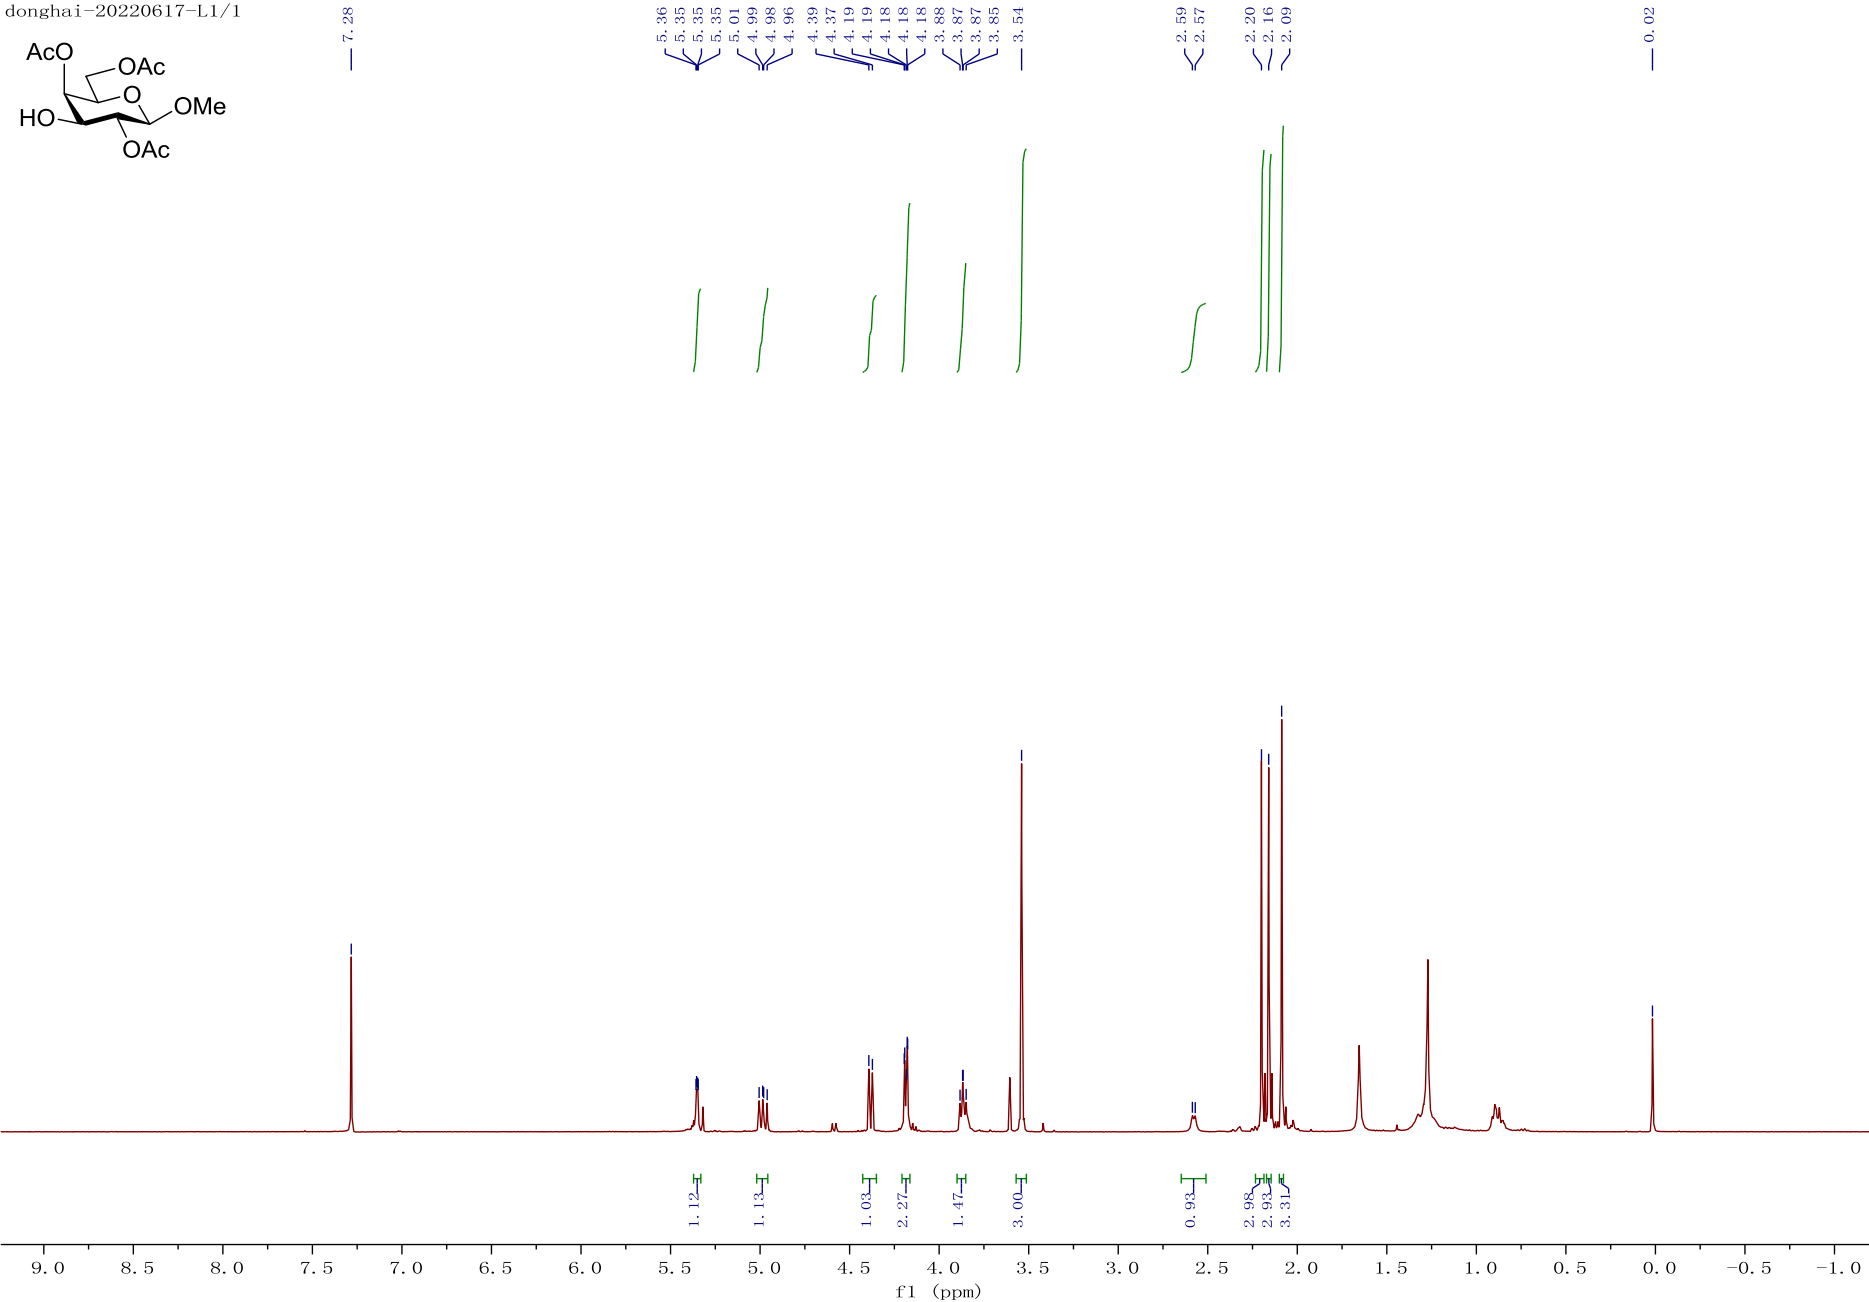

# Methyl 2,4,6-tri-*O*-acetyl-3-*O*-(*p*-methoxybenzyl)- $\alpha$ -D-mannopyranoside 29

donghai-20220511-L1/1

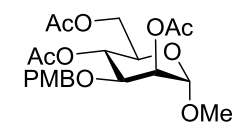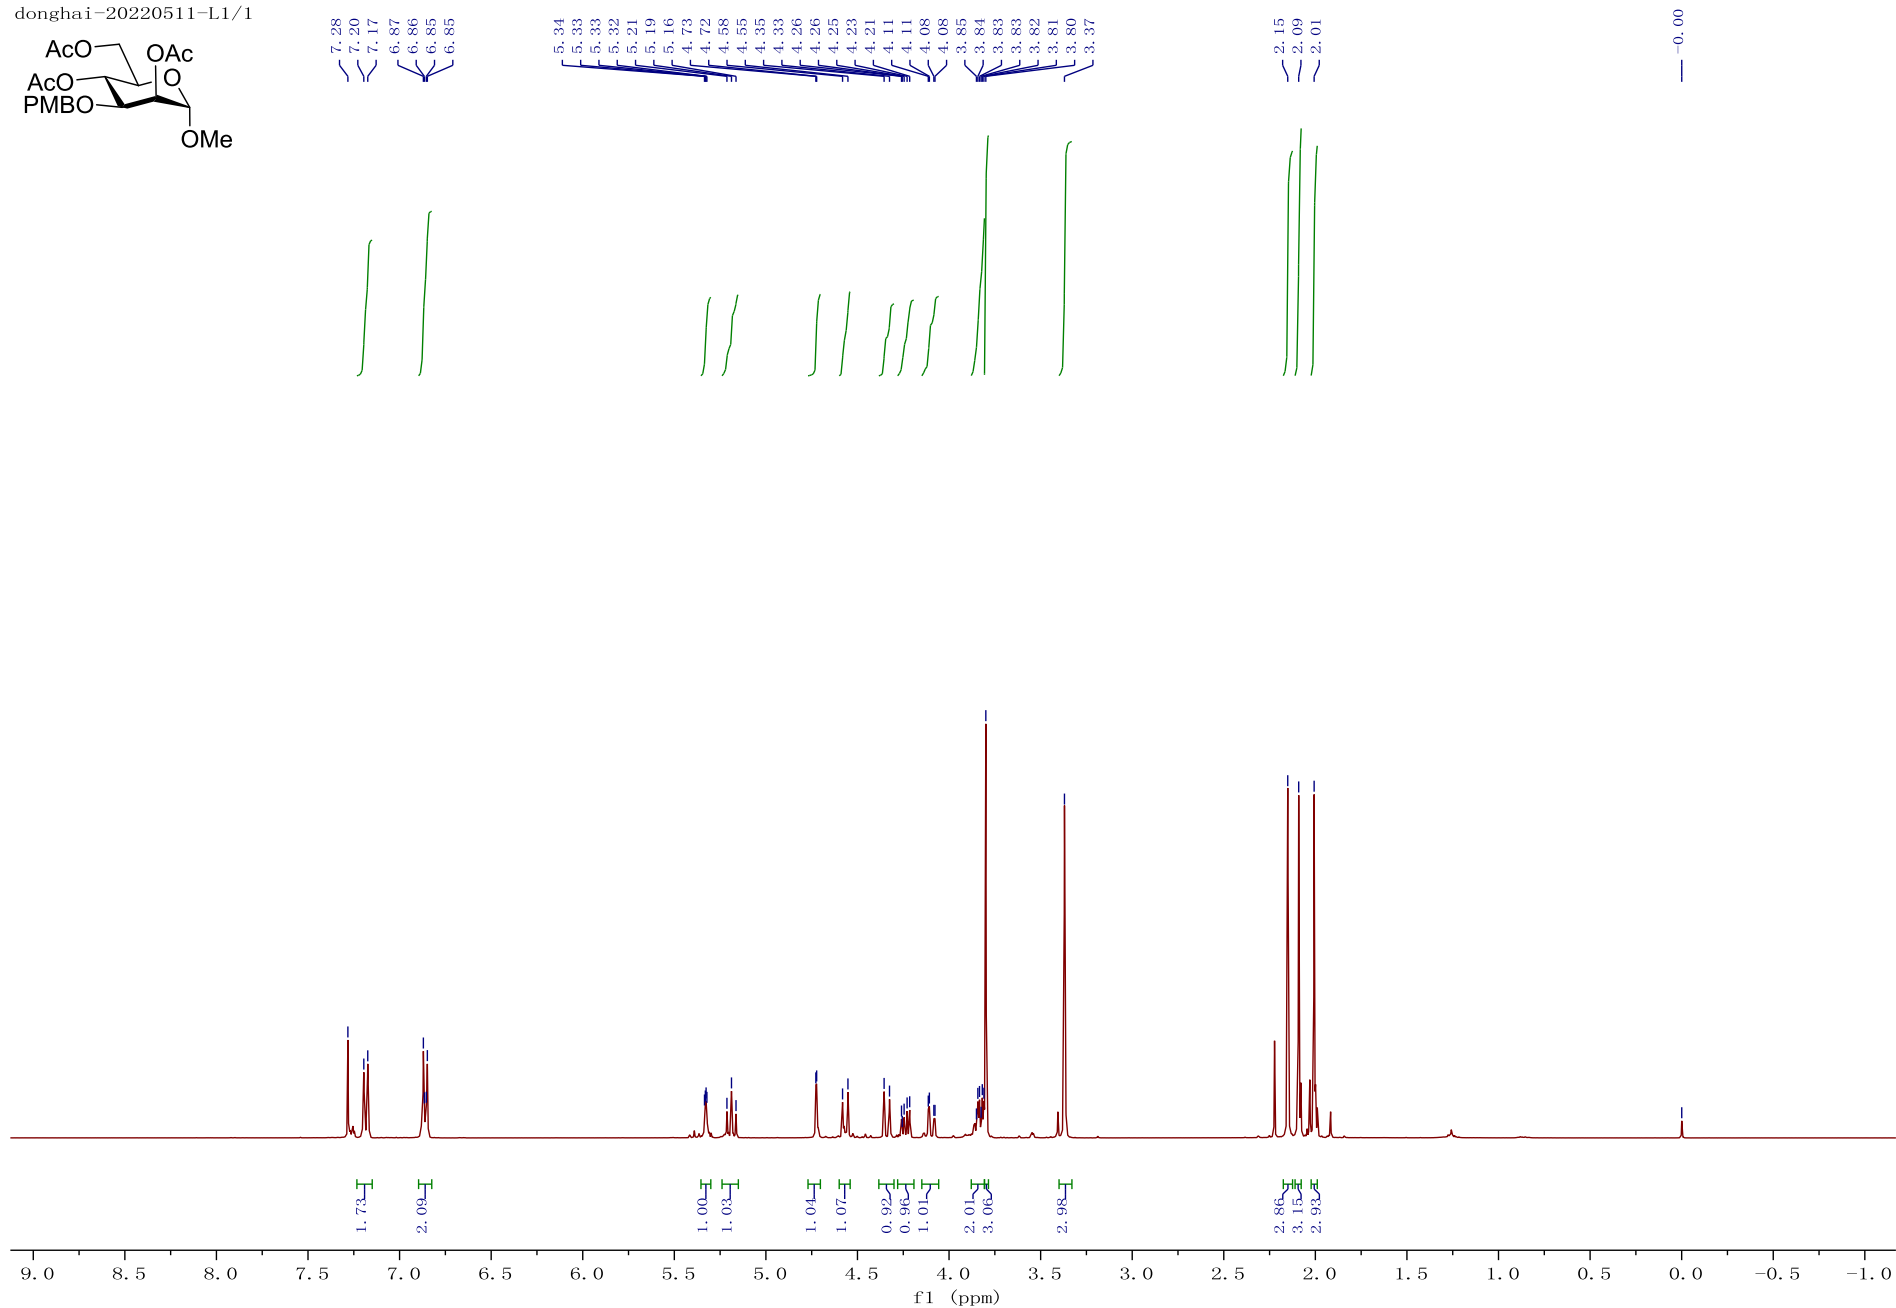

Methyl 2,4,6-tri-*O*-acetyl-3-*O*-(*p*-methoxybenzyl)- $\alpha$ -D-mannopyranoside 29

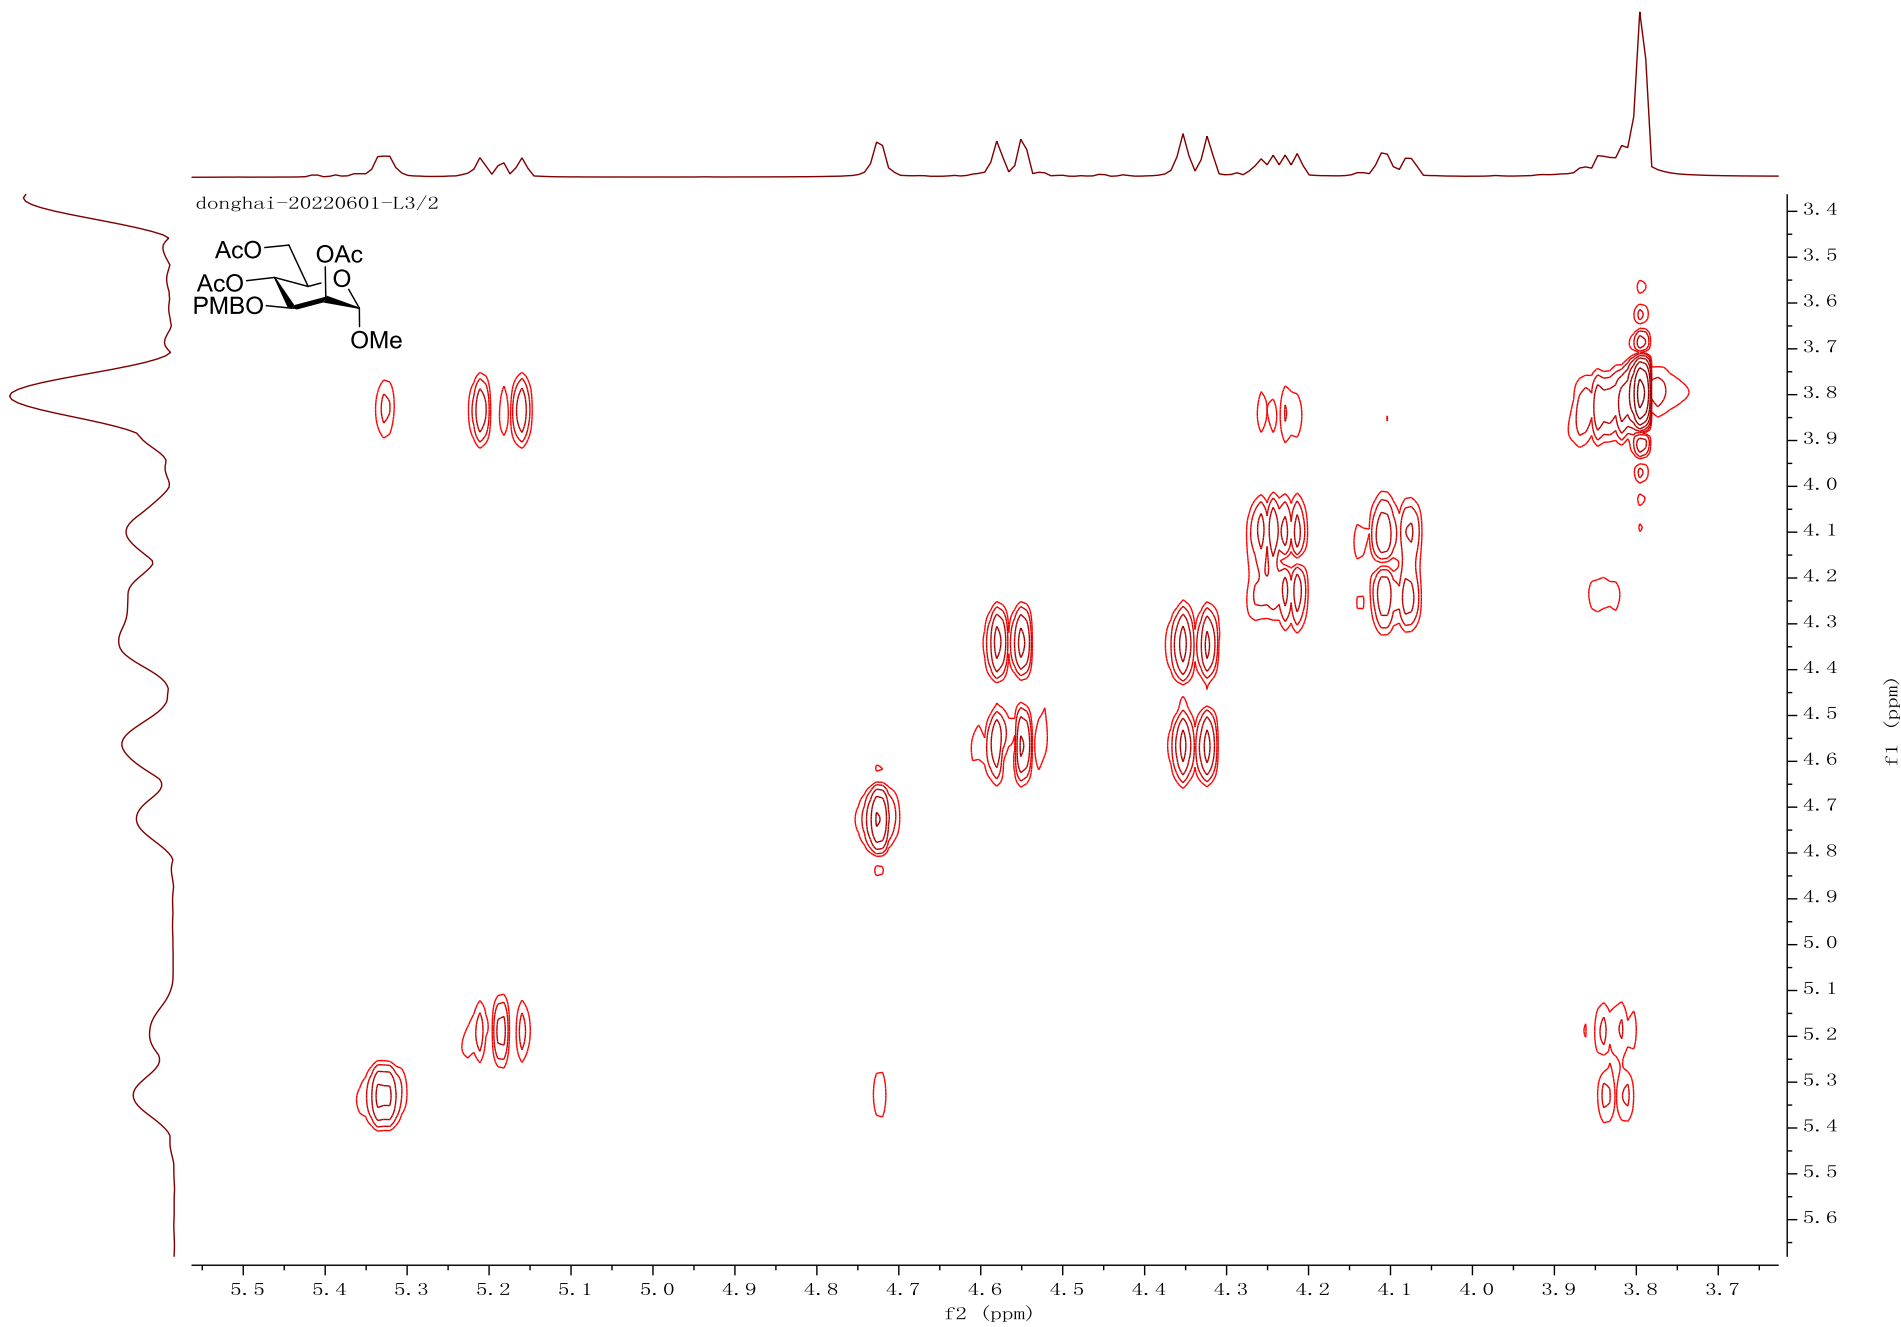

Methyl 2,4,6-tri-*O*-acetyl-3-*O*-(*p*-methoxybenzyl)- $\alpha$ -D-mannopyranoside 29

donghai-20220601-11373

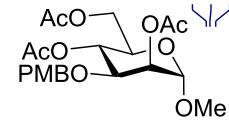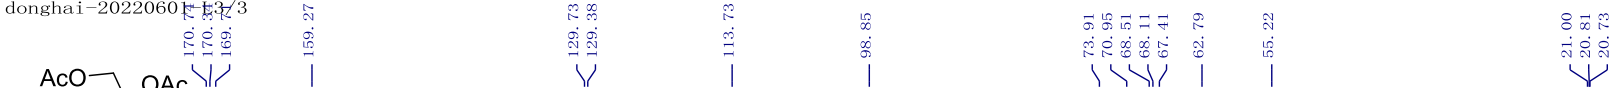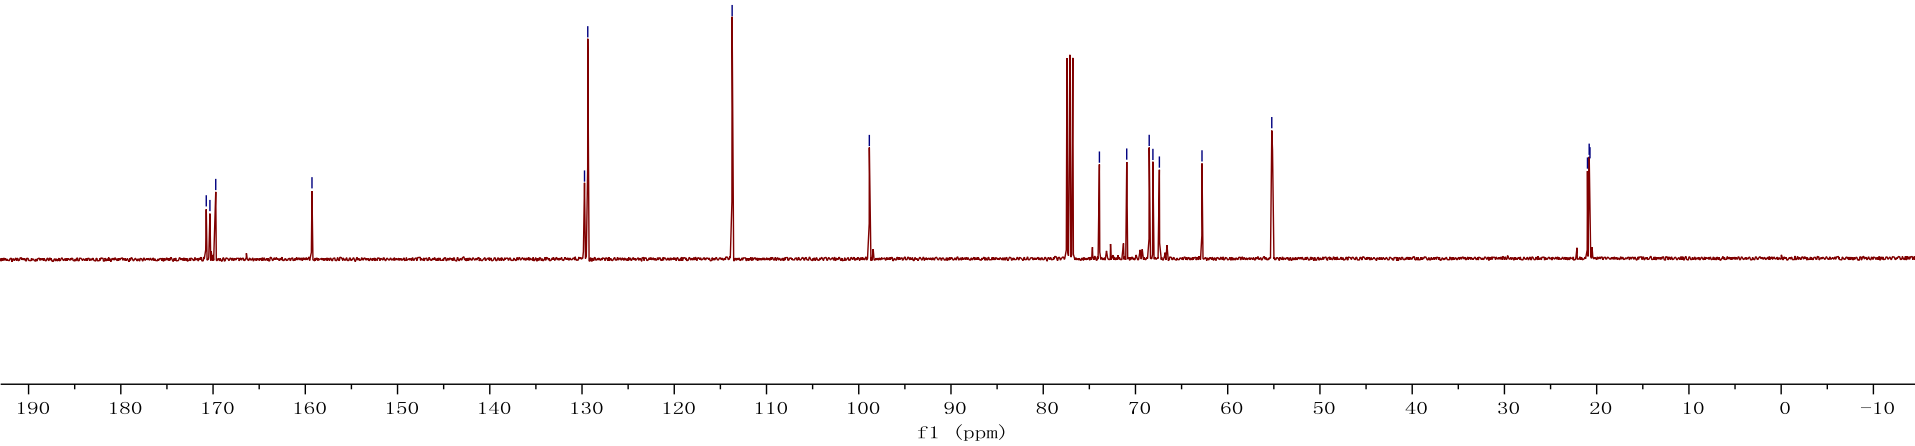

Methyl 2,4,6-tri-*O*-acetyl- $\alpha$ -D-mannopyranoside 30

donghai-20220509-L1/1

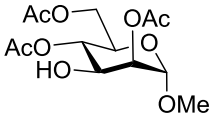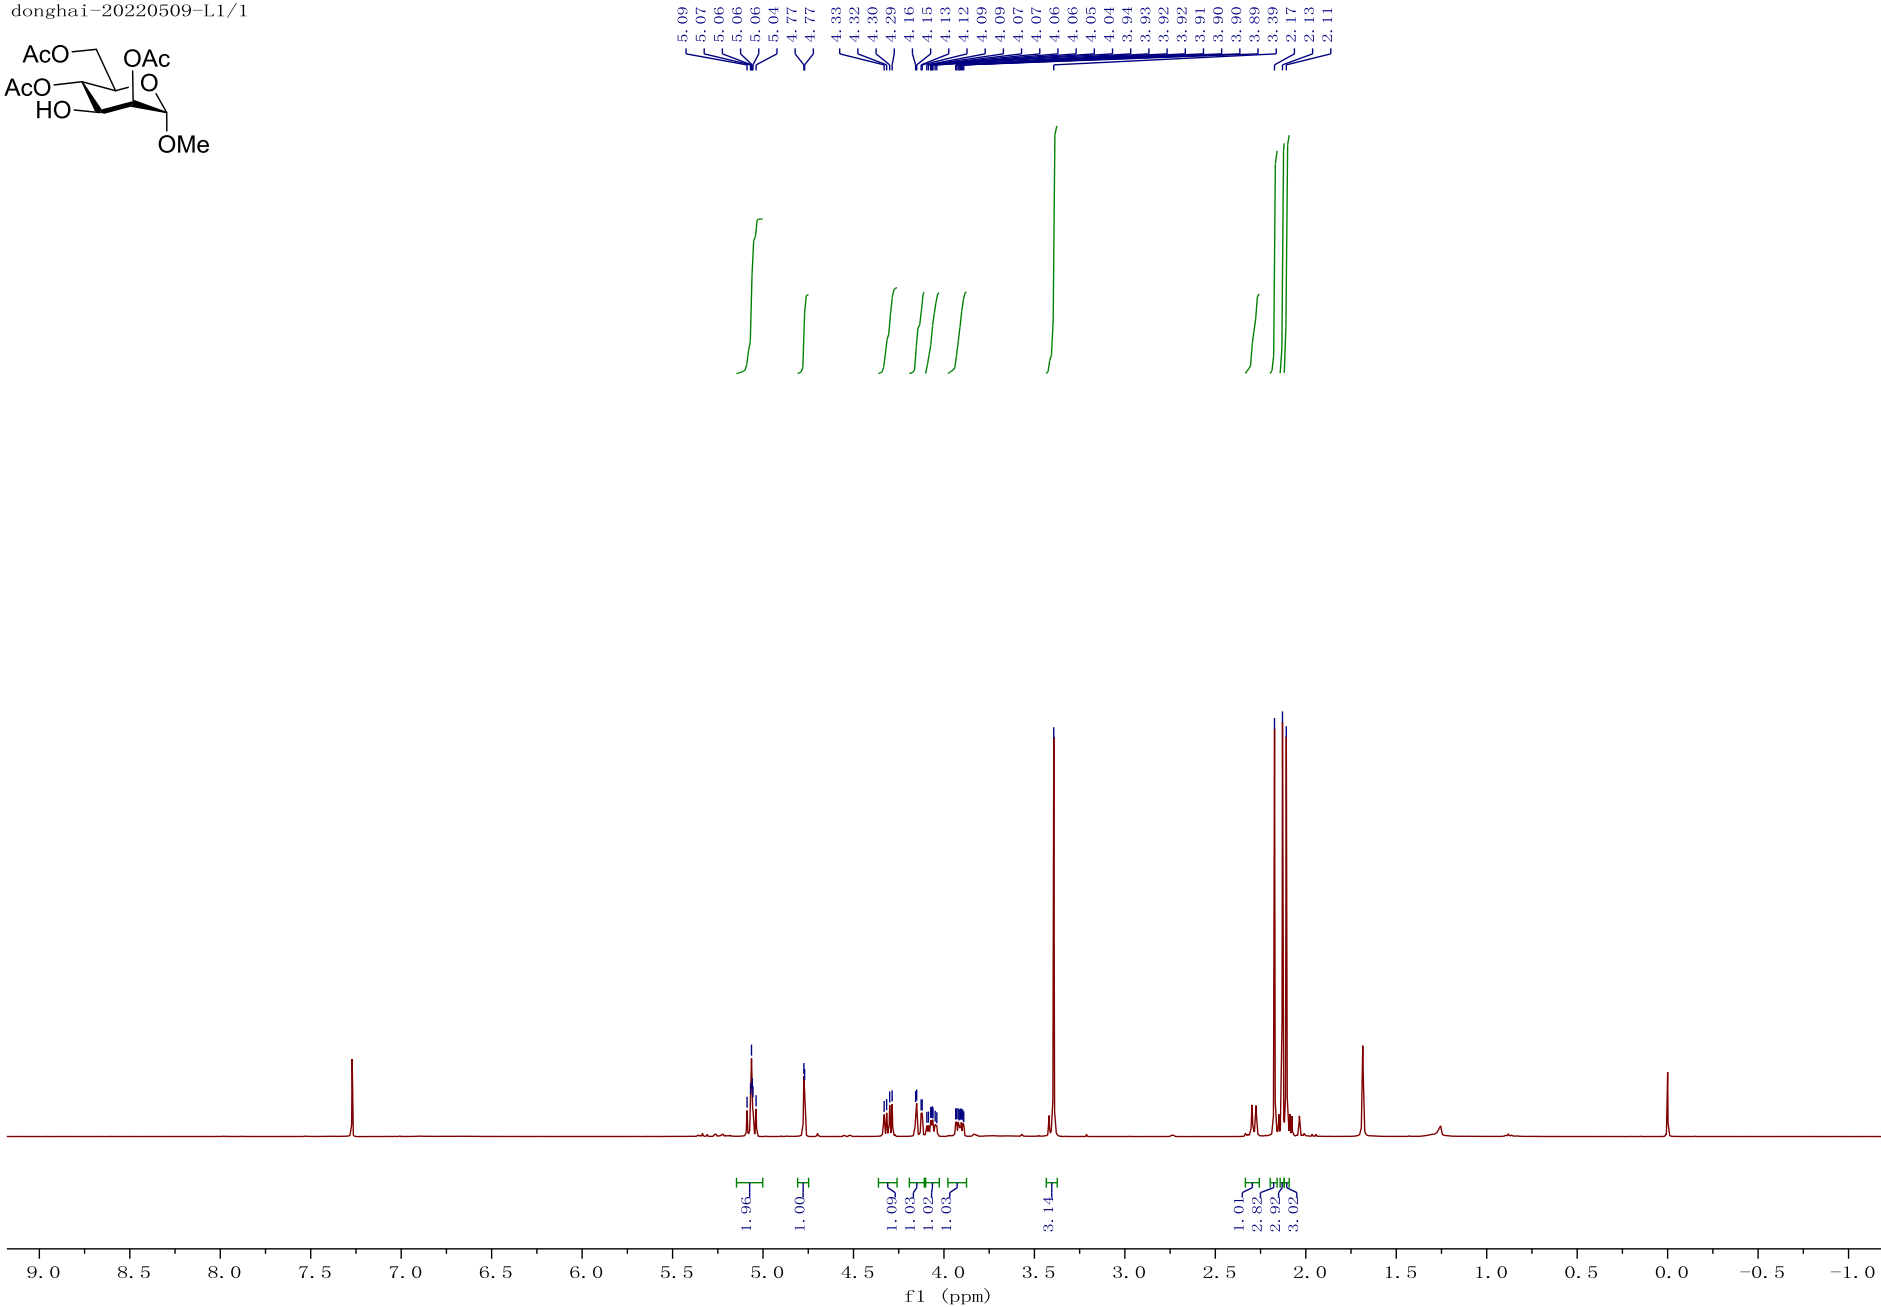



Methyl 2-*O*-*p*-methoxybenzyl-3-*O*-benzyl-4,6-*O*-benzylidene- $\alpha$ -D-glucopyranoside 31

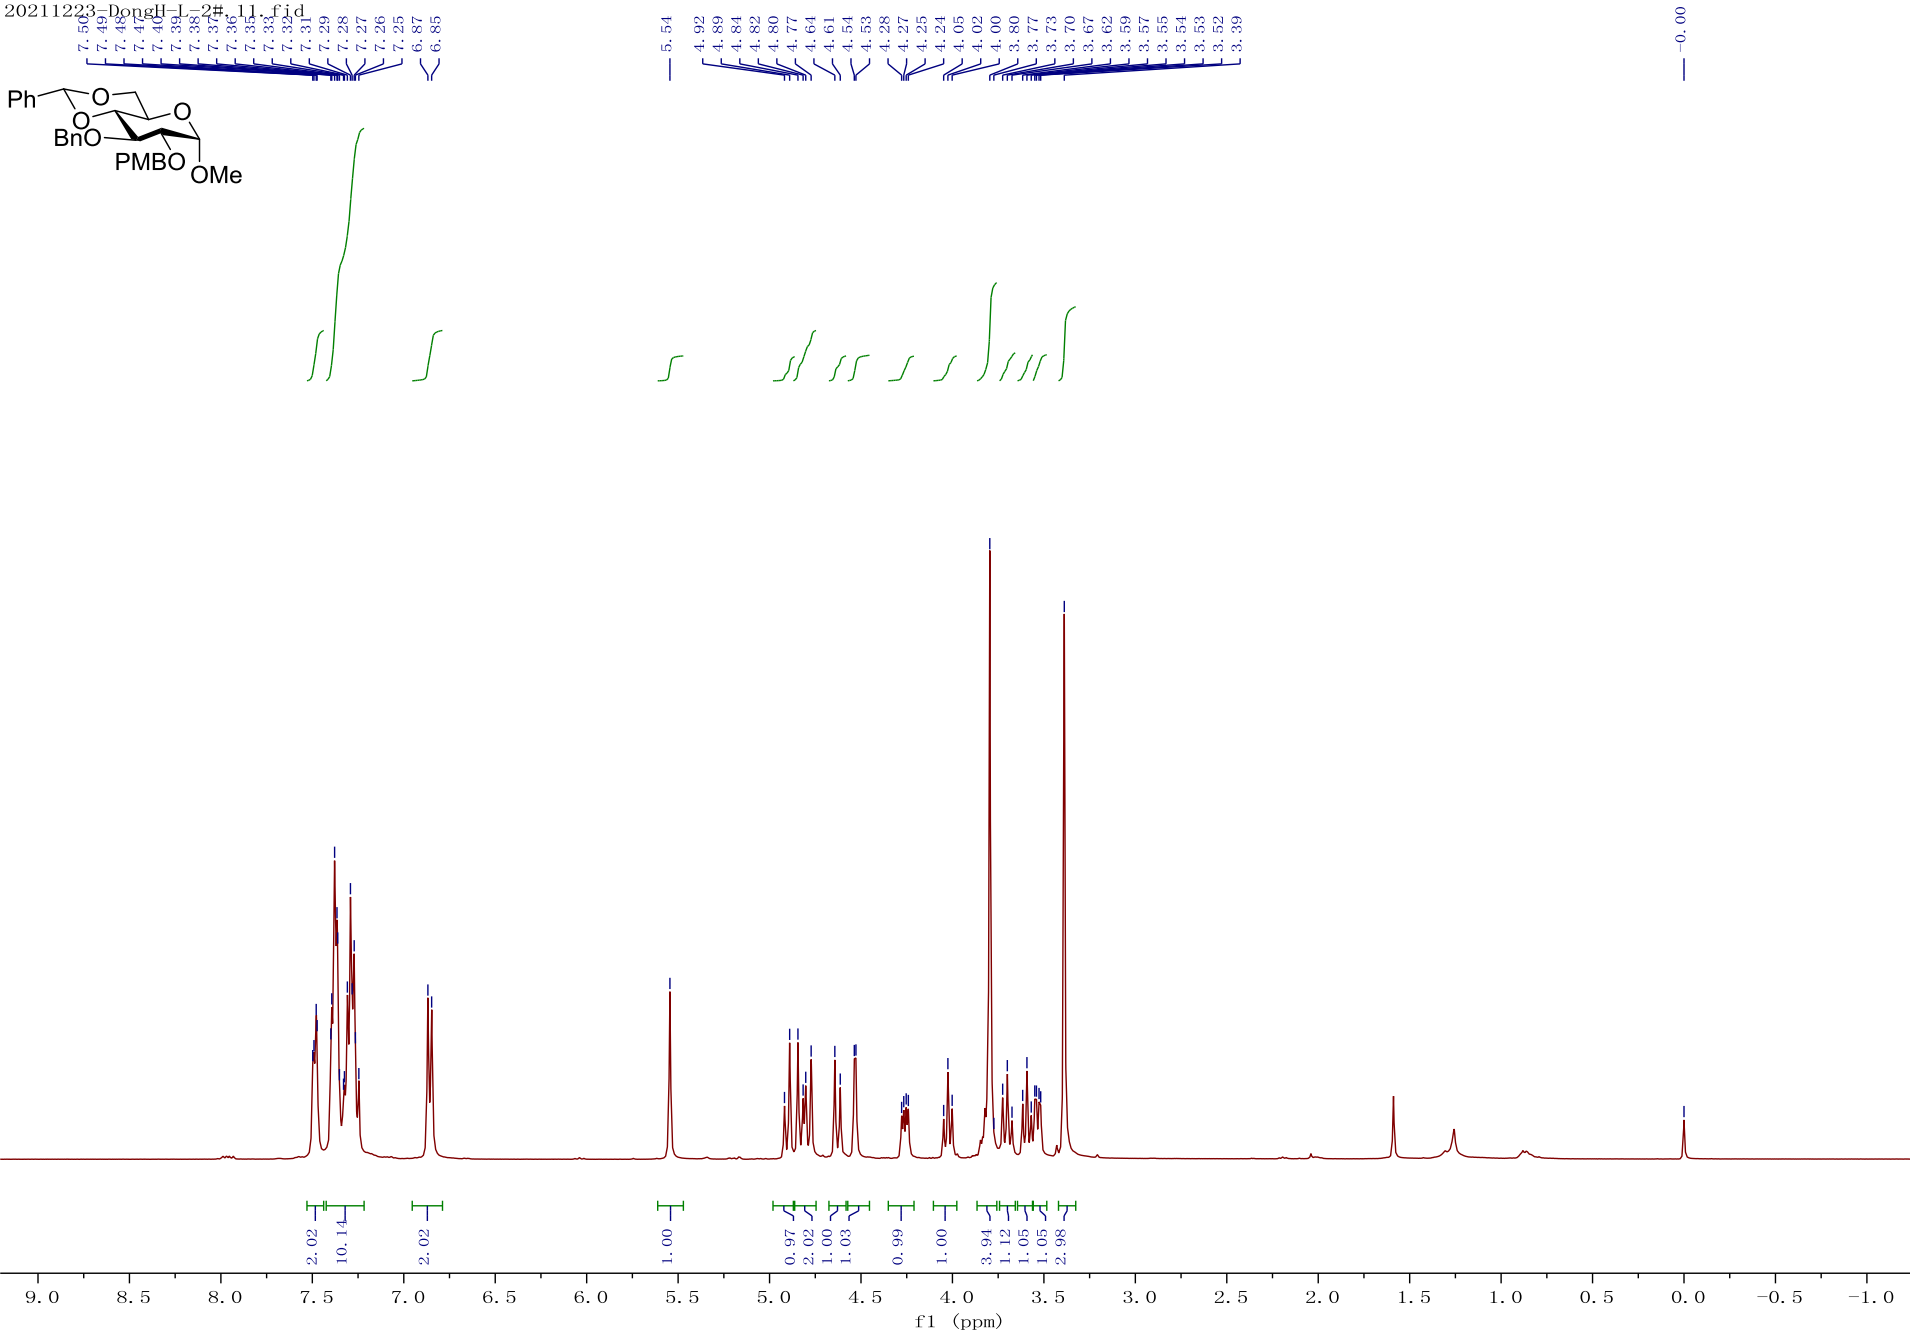

Methyl 2-*O*-*p*-methoxybenzyl-3-*O*-benzyl-4,6-*O*-benzylidene- $\alpha$ -D-glucopyranoside 31

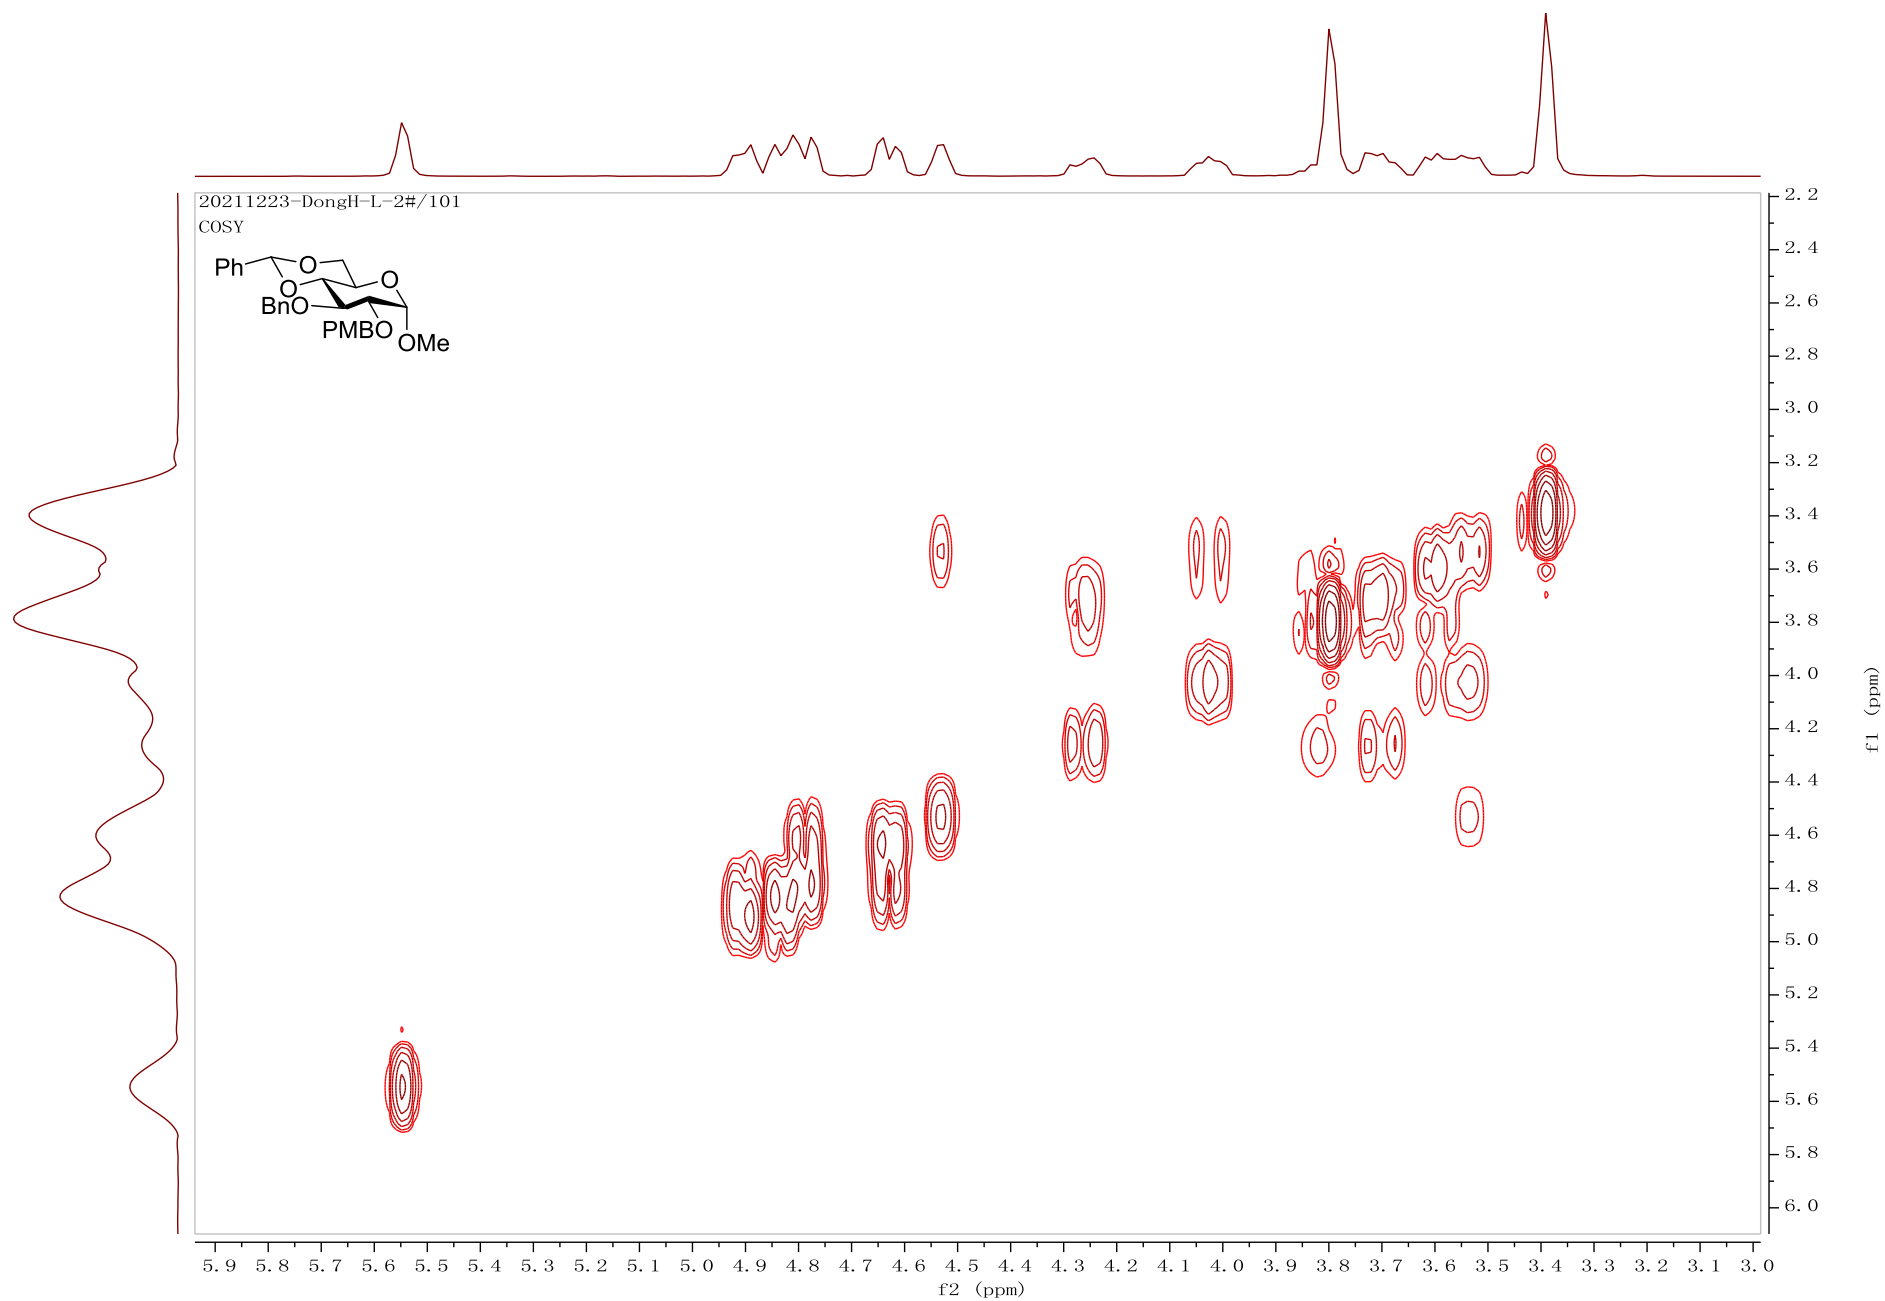

Methyl 2-*O*-*p*-methoxybenzyl-3-*O*-benzyl-4,6-*O*-benzylidene- $\alpha$ -D-glucopyranoside 31

20211223-DongH-L-2#. 21. fid

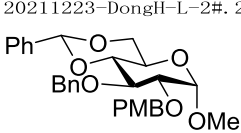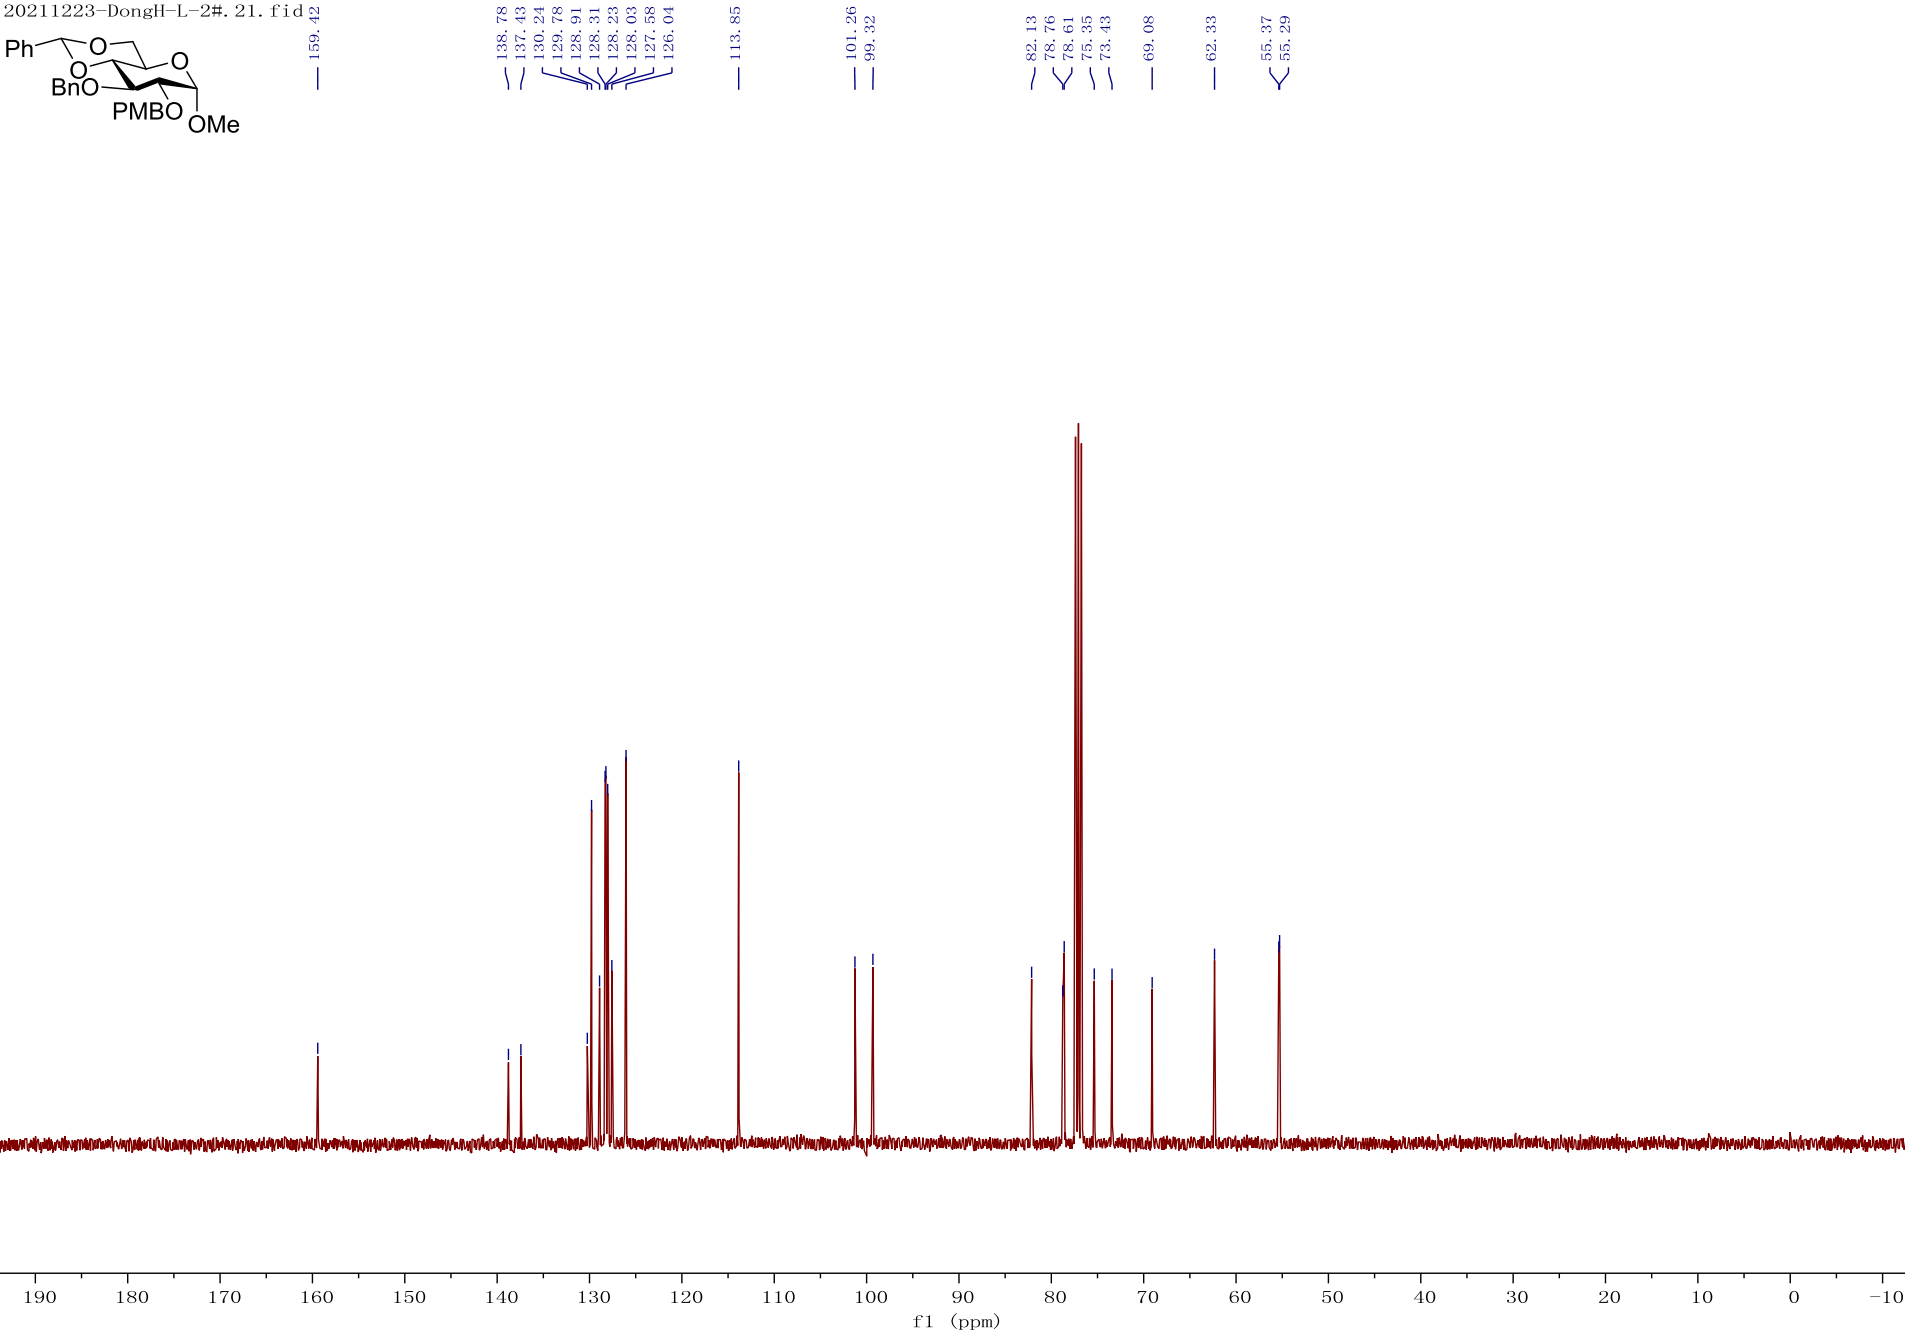

# Methyl 3-*O*-benzyl-4,6-*O*-benzylidene- $\alpha$ -D-glucopyranoside 32

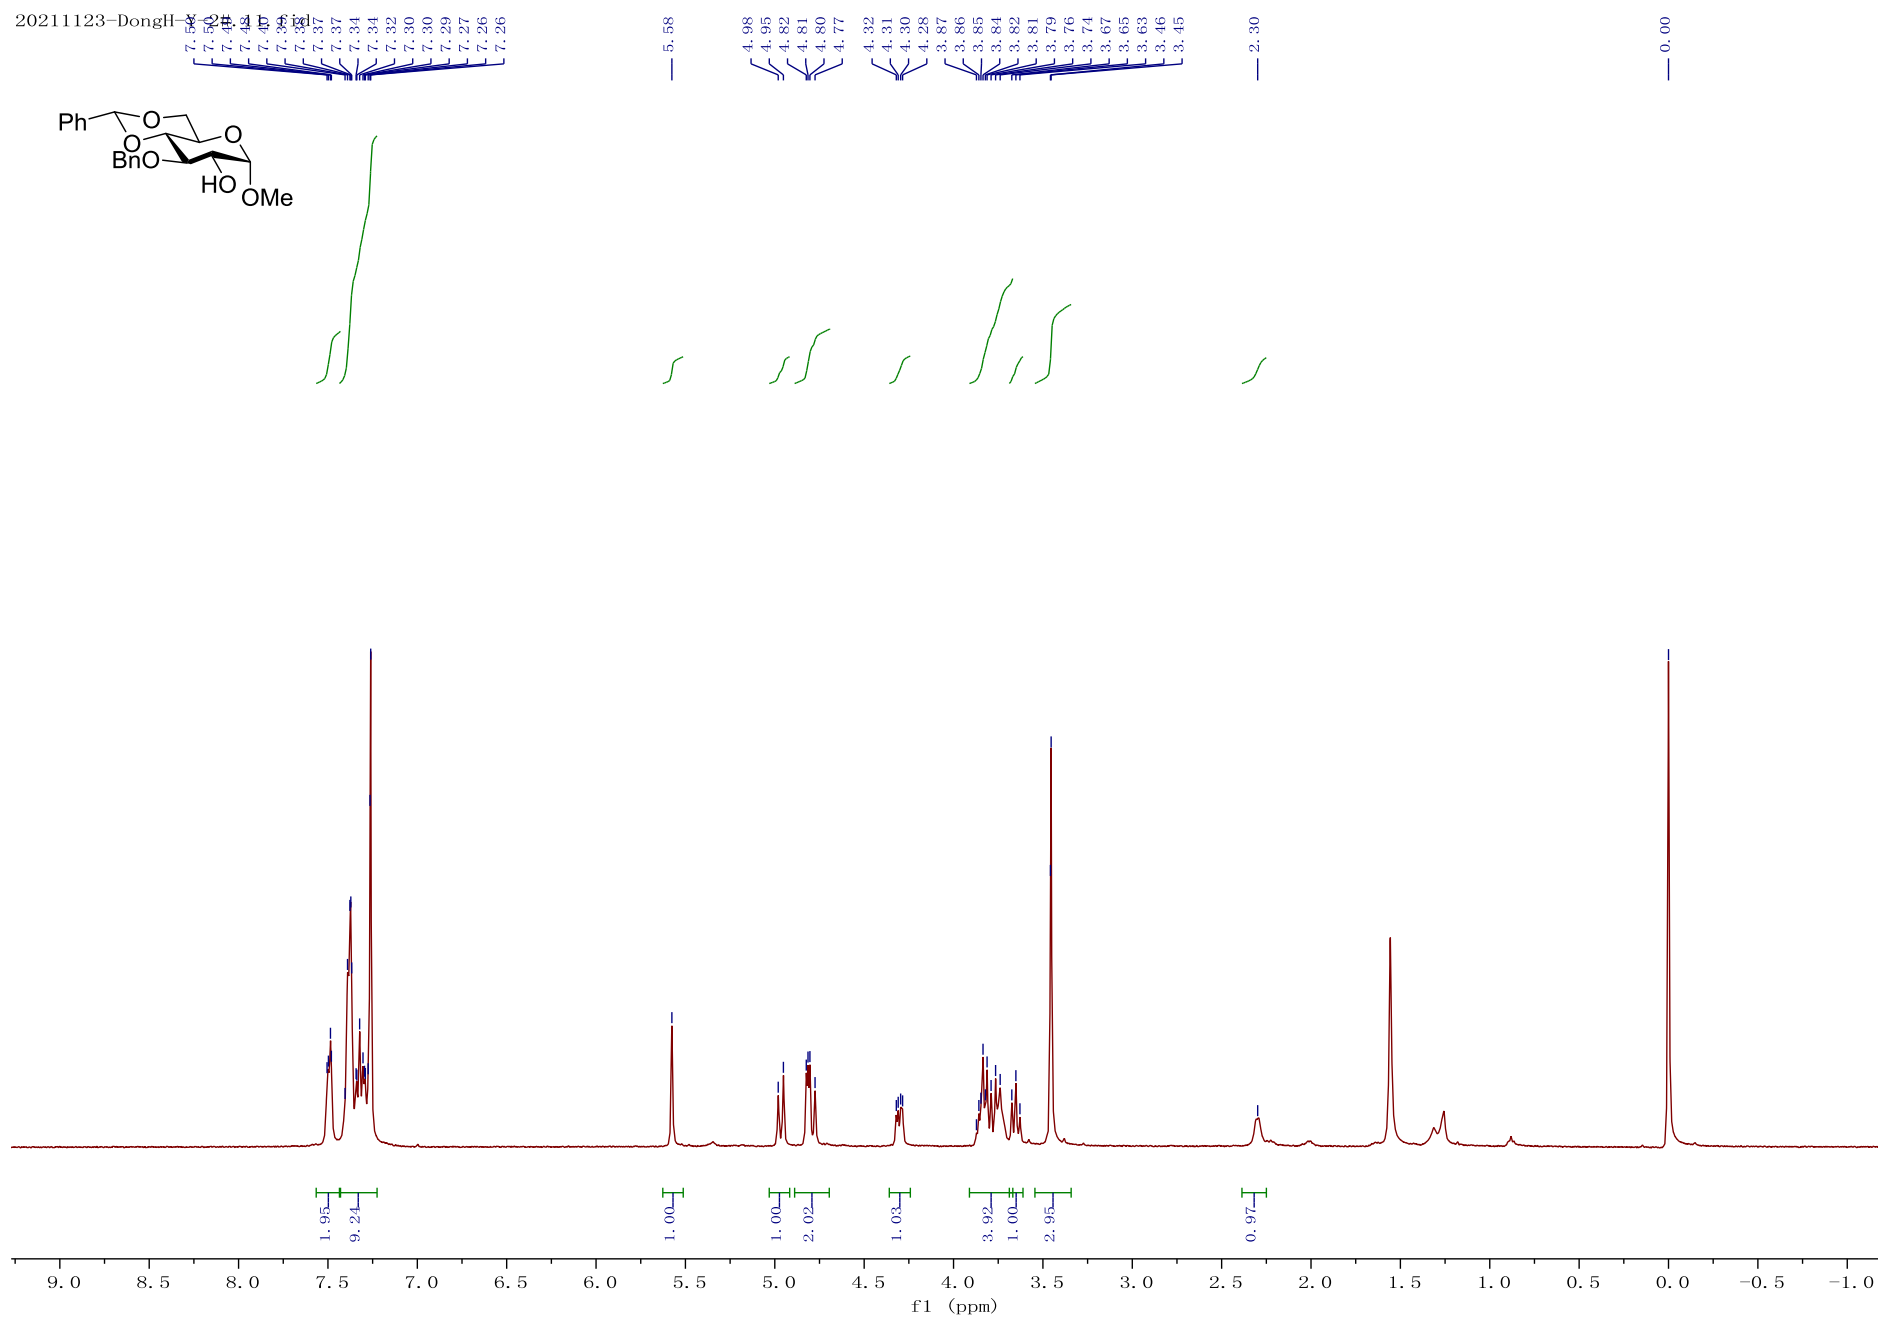

Methyl 2-*O*-*p*-methoxybenzyl-3-*O*-*tert*-butyl-dimethylsilyl-4,6-*O*-benzylidene- $\alpha$ -D-glucopyranoside 33

4, 6-Ph-3-TBS-2-PMBO 葡萄糖衍生物  
donghai411403

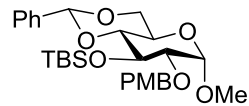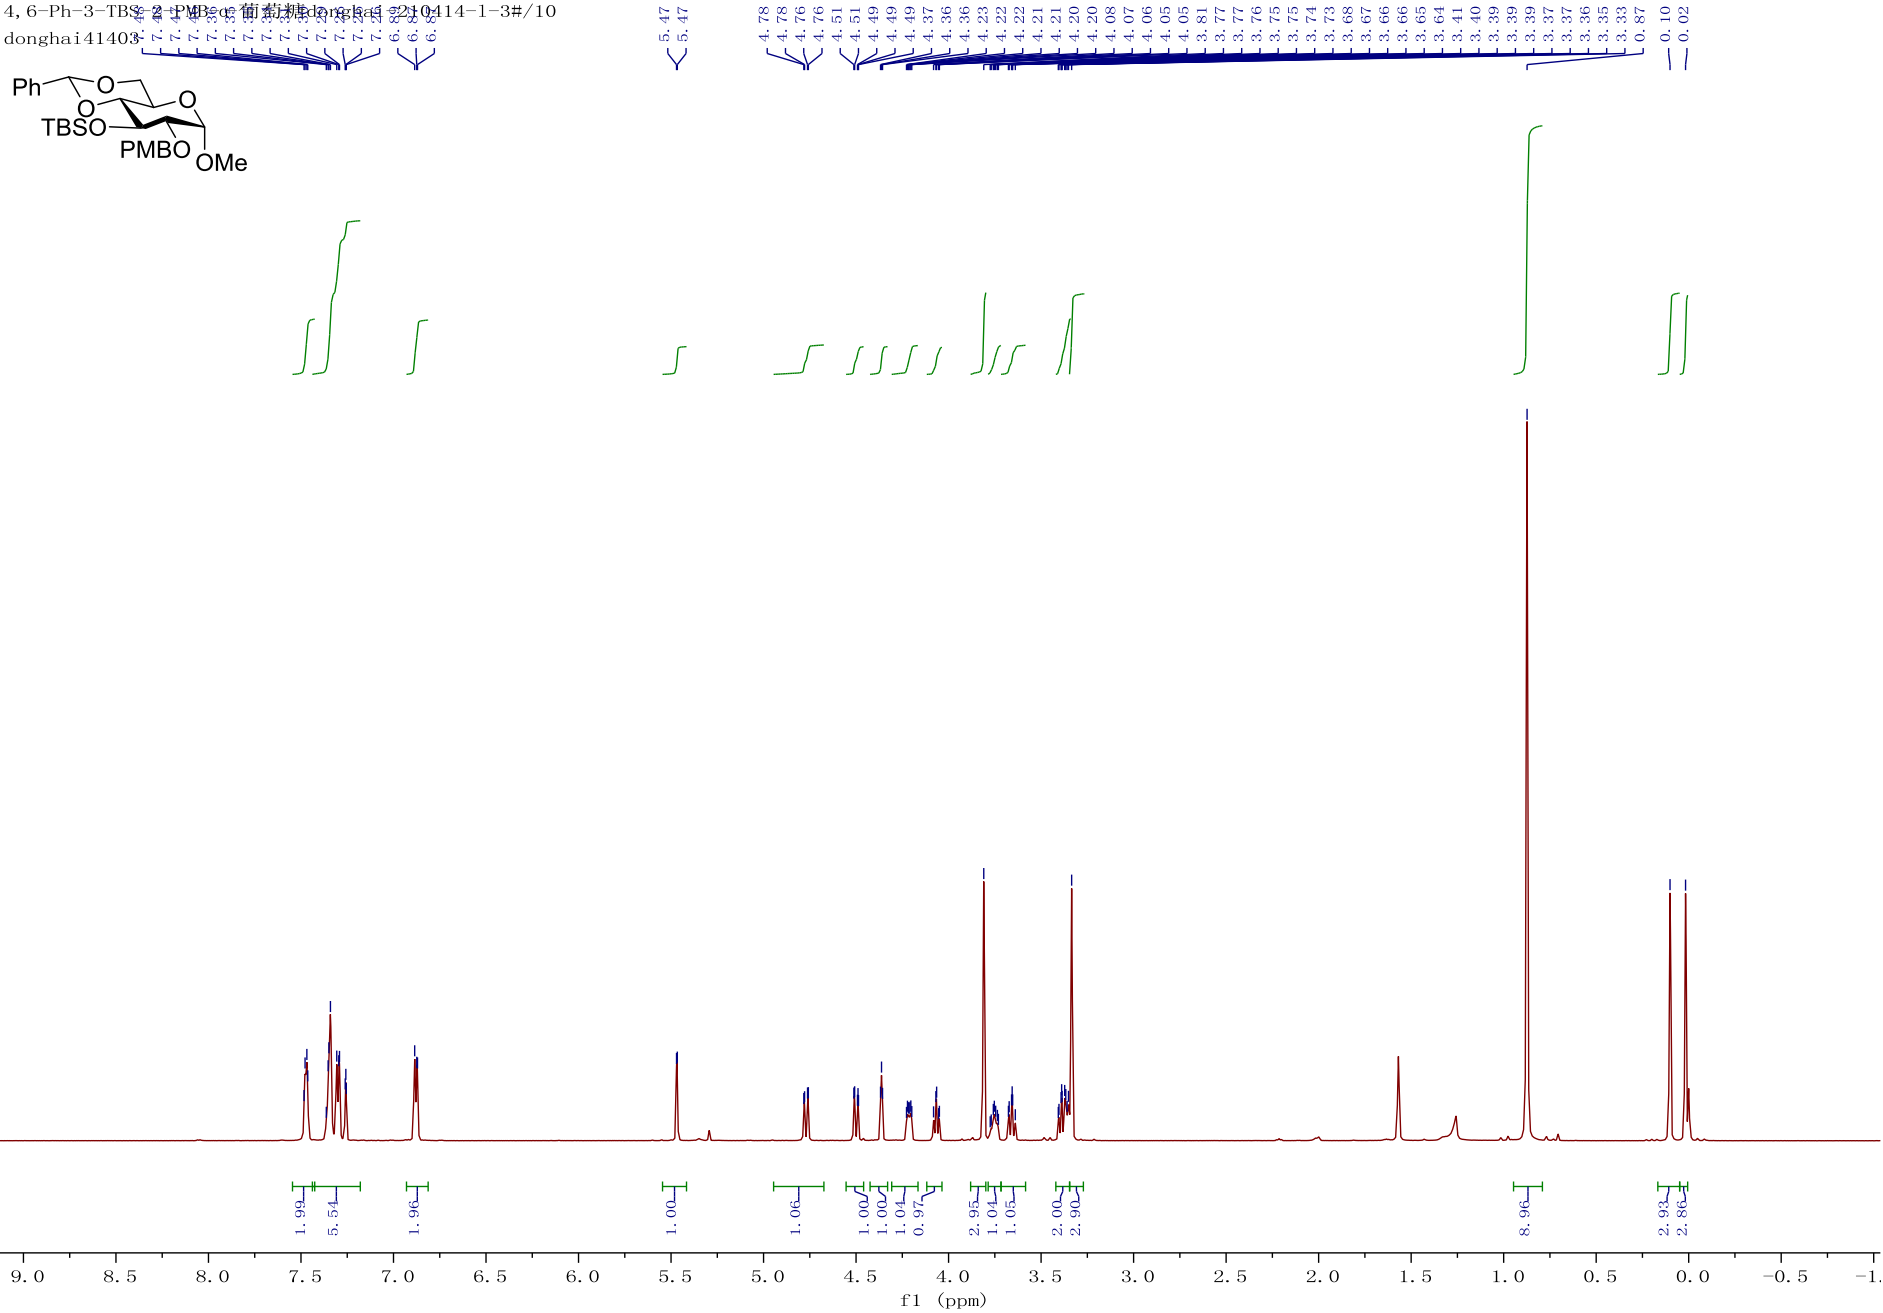

Methyl 2-*O*-*p*-methoxybenzyl-3-*O*-*tert*-butyl-dimethylsilyl-4,6-*O*-benzylidene- $\alpha$ -D-glucopyranoside 33

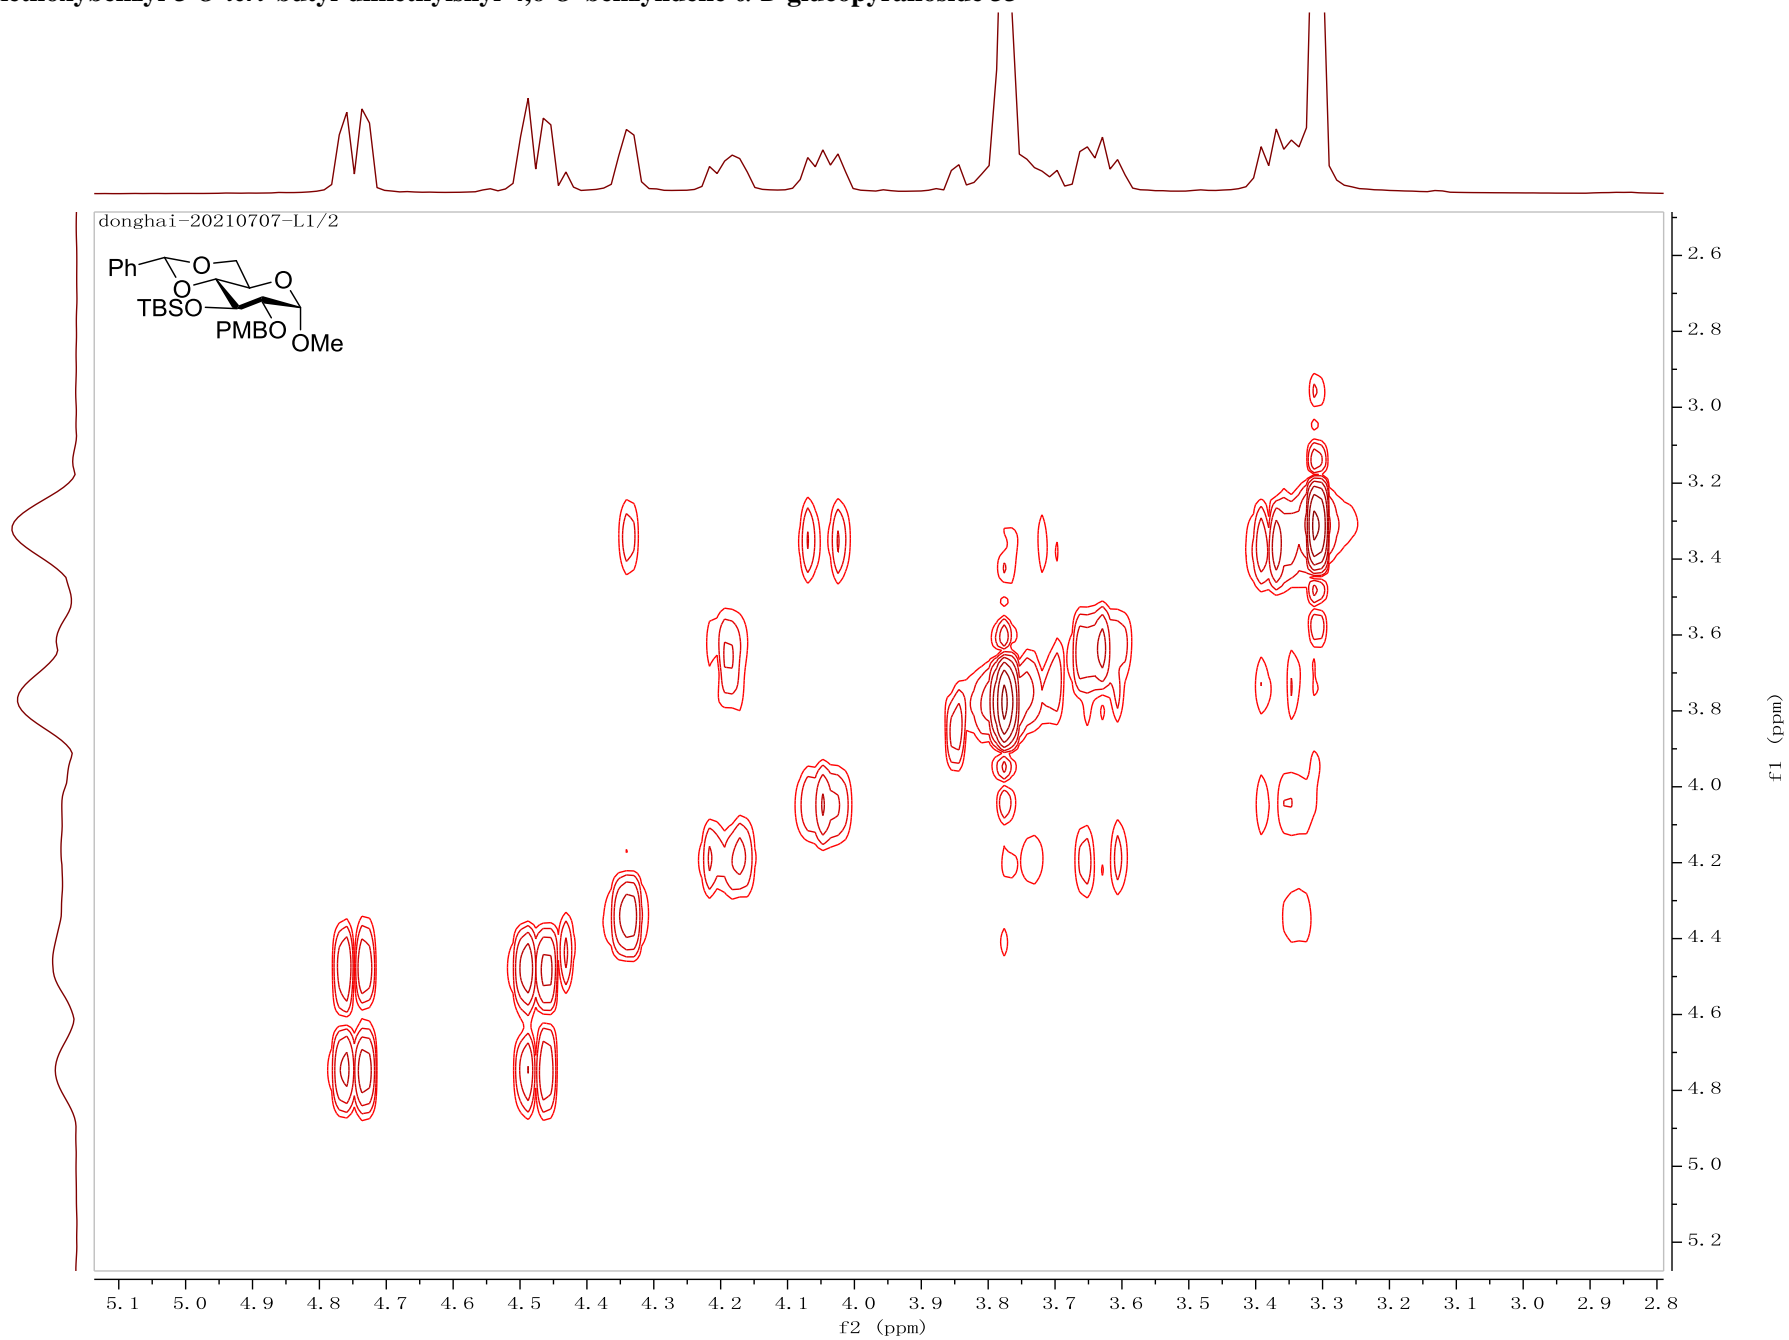

**Methyl 2-*O*-*p*-methoxybenzyl-3-*O*-*tert*-butyl-dimethylsilyl-4,6-*O*-benzylidene- $\alpha$ -D-glucopyranoside 33**

20210629-DongH-L-2#. 21. f1.d

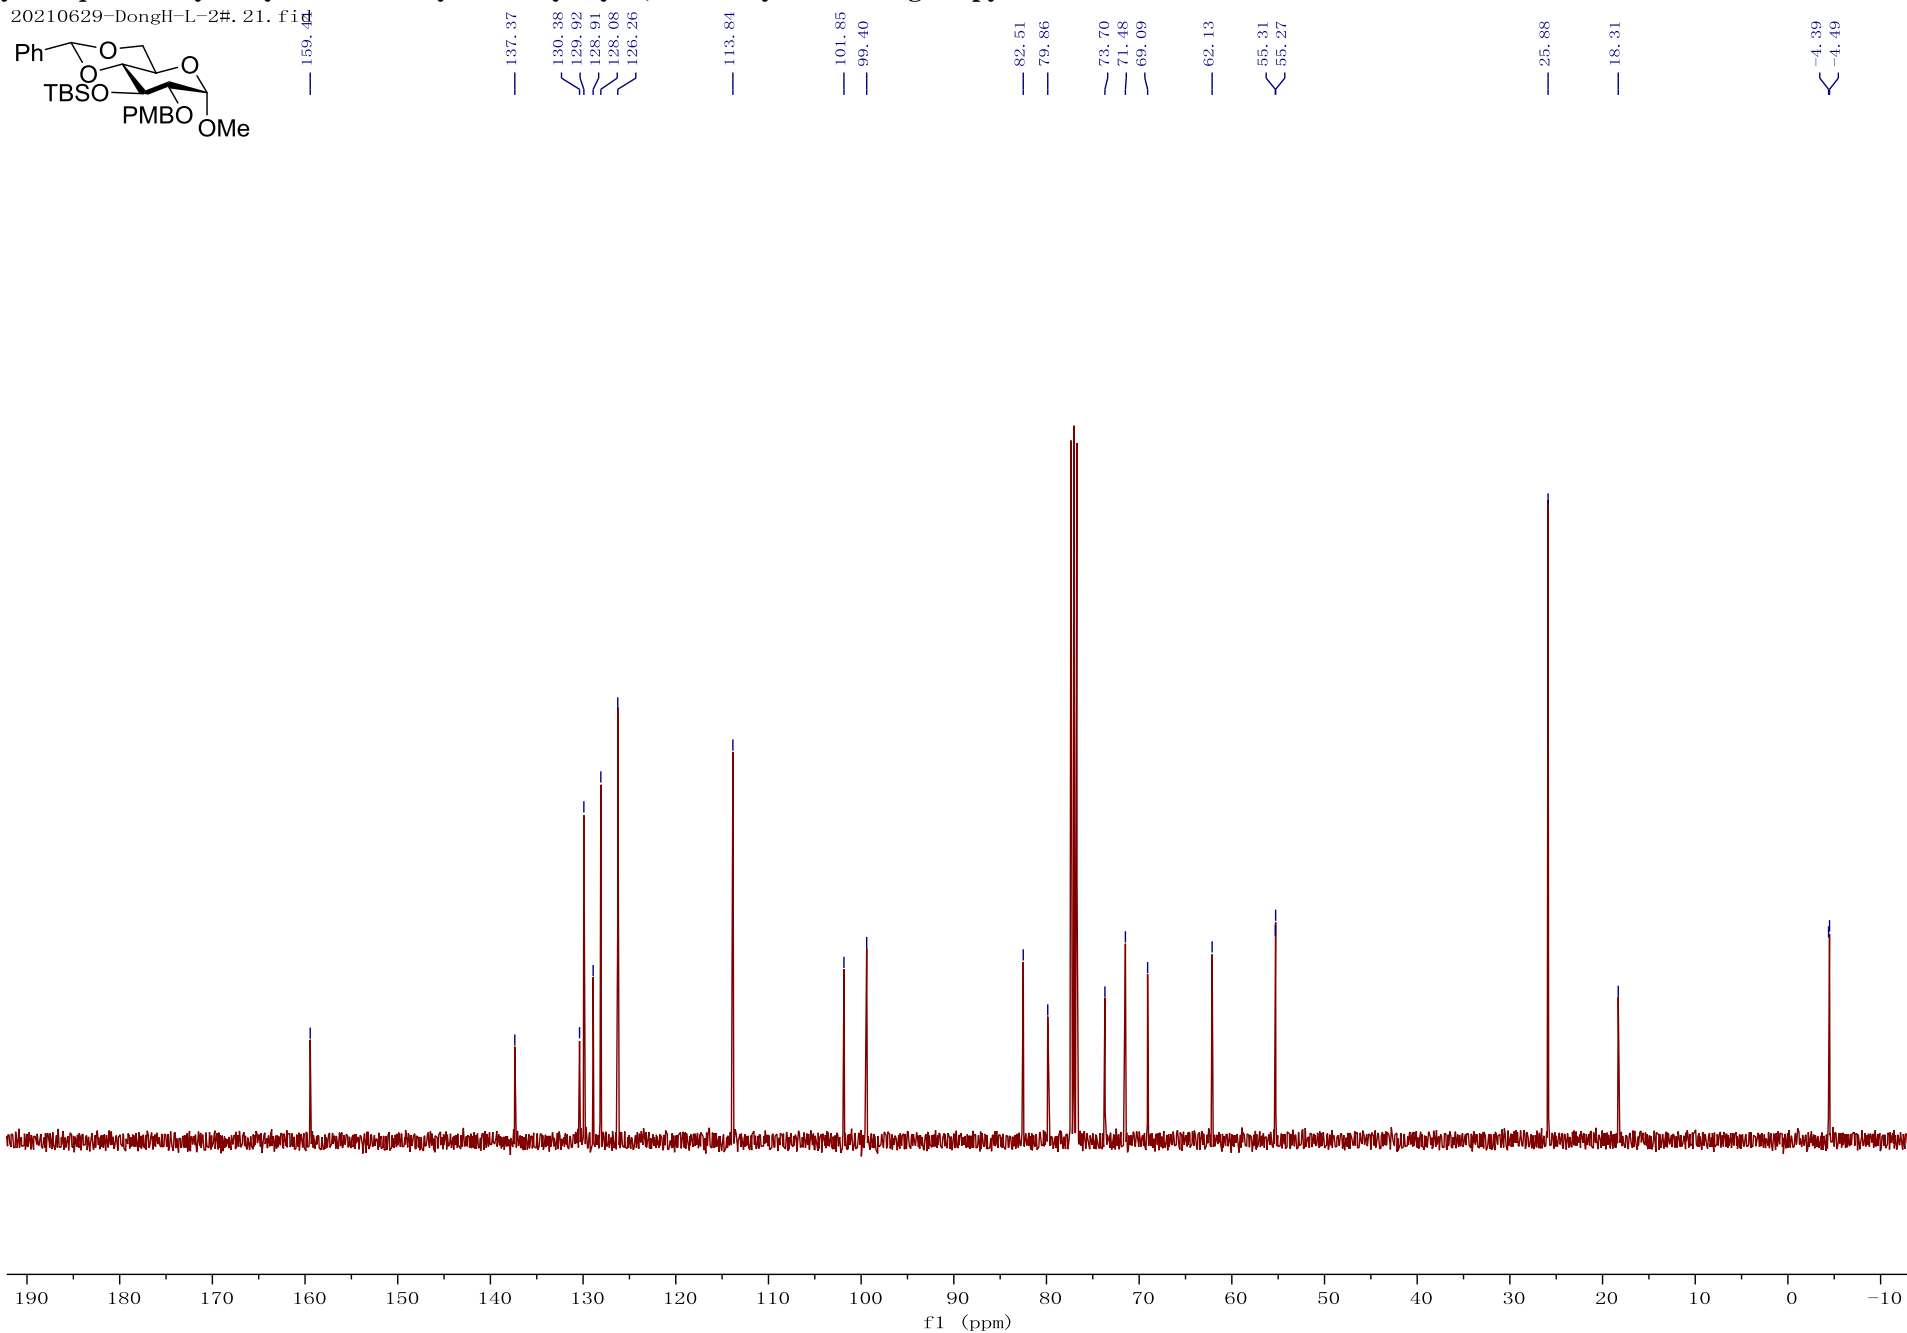

Methyl 3-*O*-*tert*-butyl-dimethylsilyl-4,6-*O*-benzylidene- $\alpha$ -D-glucopyranoside 34

4, 6-Ph-3-TBS- $\alpha$ -葡萄糖 donghai-20210423-L-5#/1

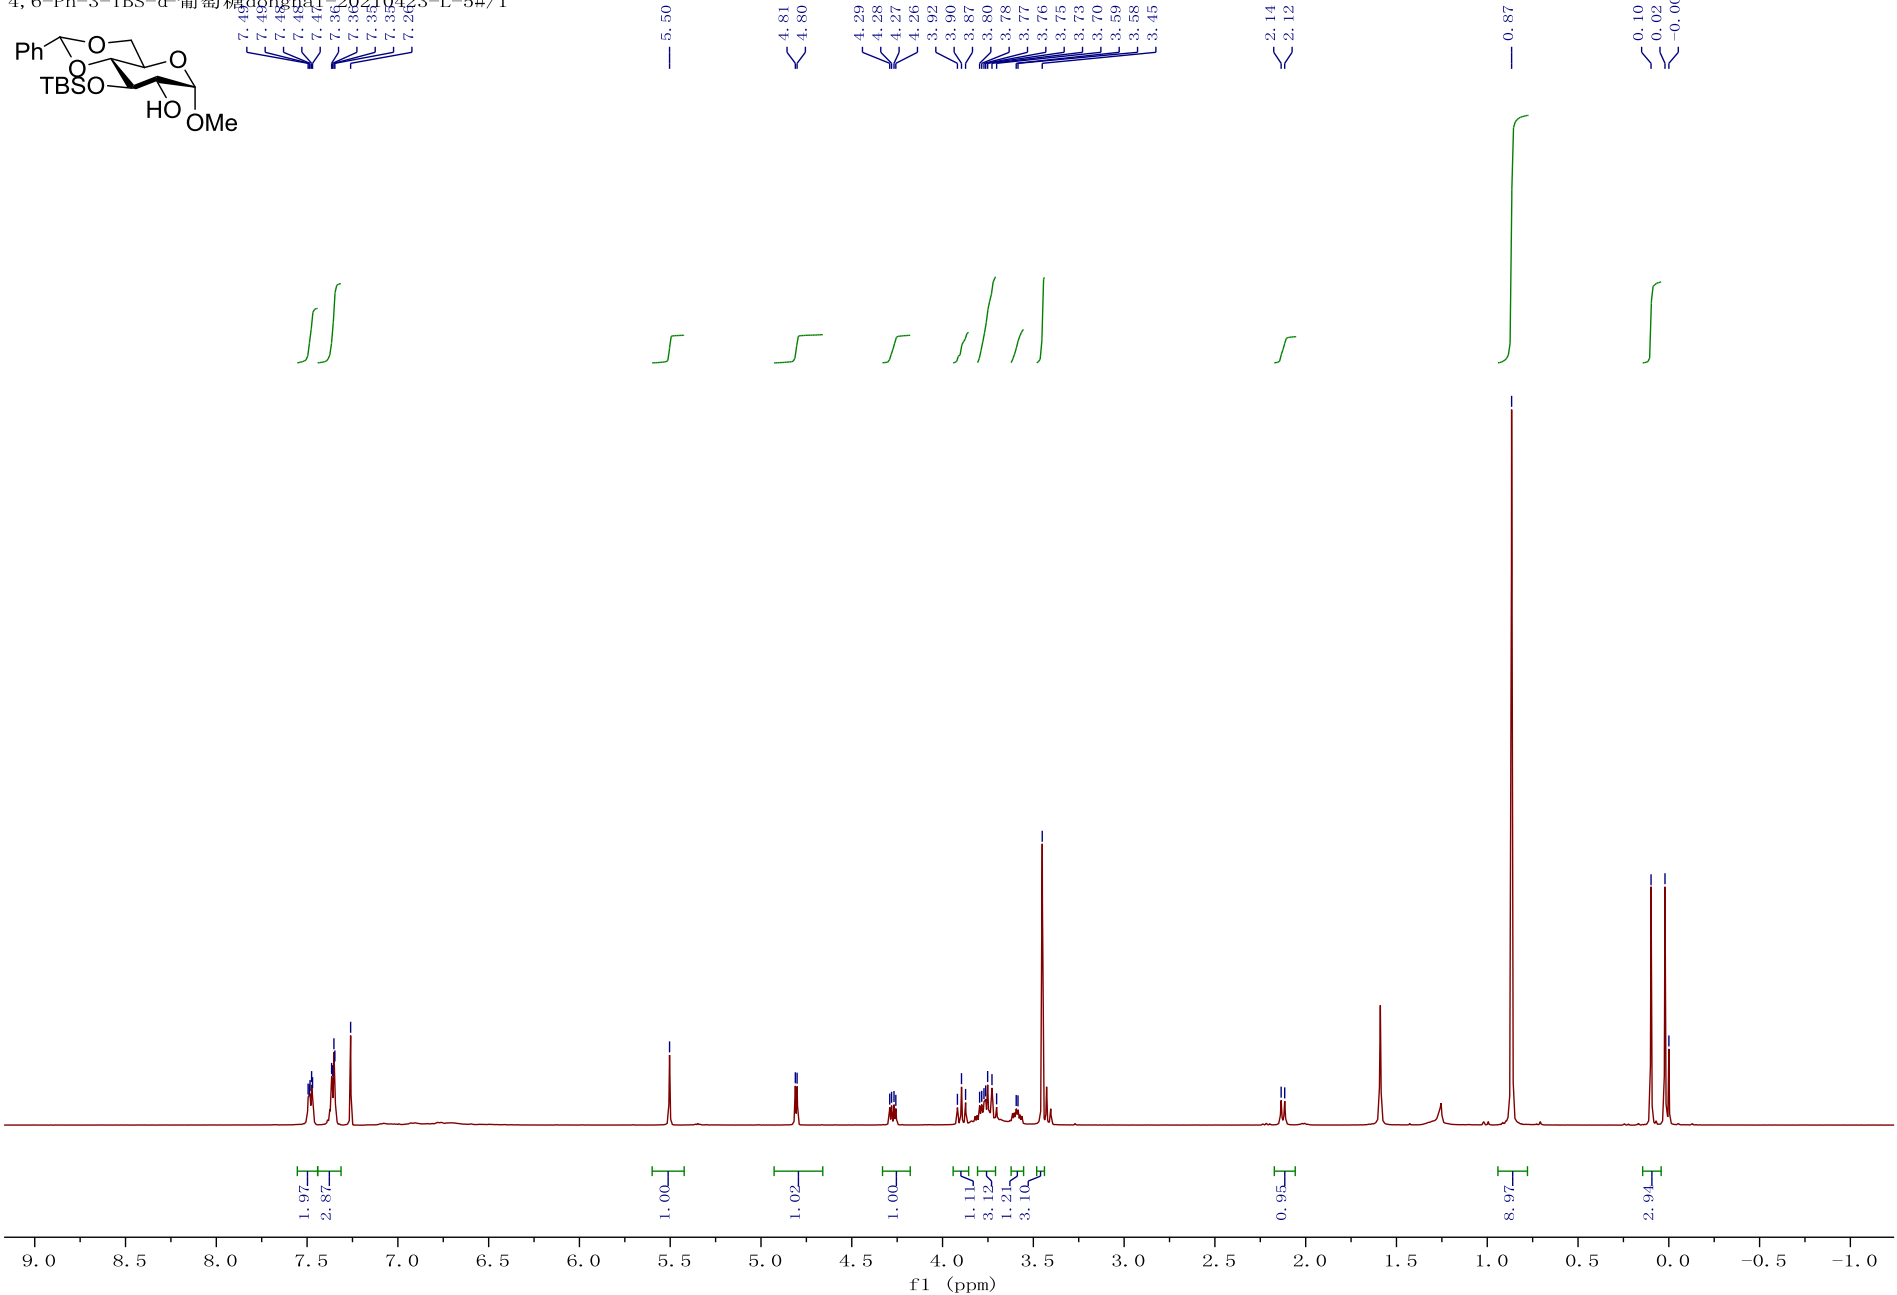



**1,2:5,6-Di-*O*-isopropylidene-3-*O*-*p*-methoxybenzyl- $\alpha$ -D-glucufuranose 35**

20210723-DongH-L-4#. 11. fid

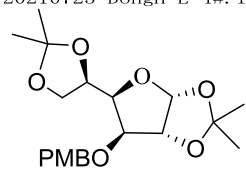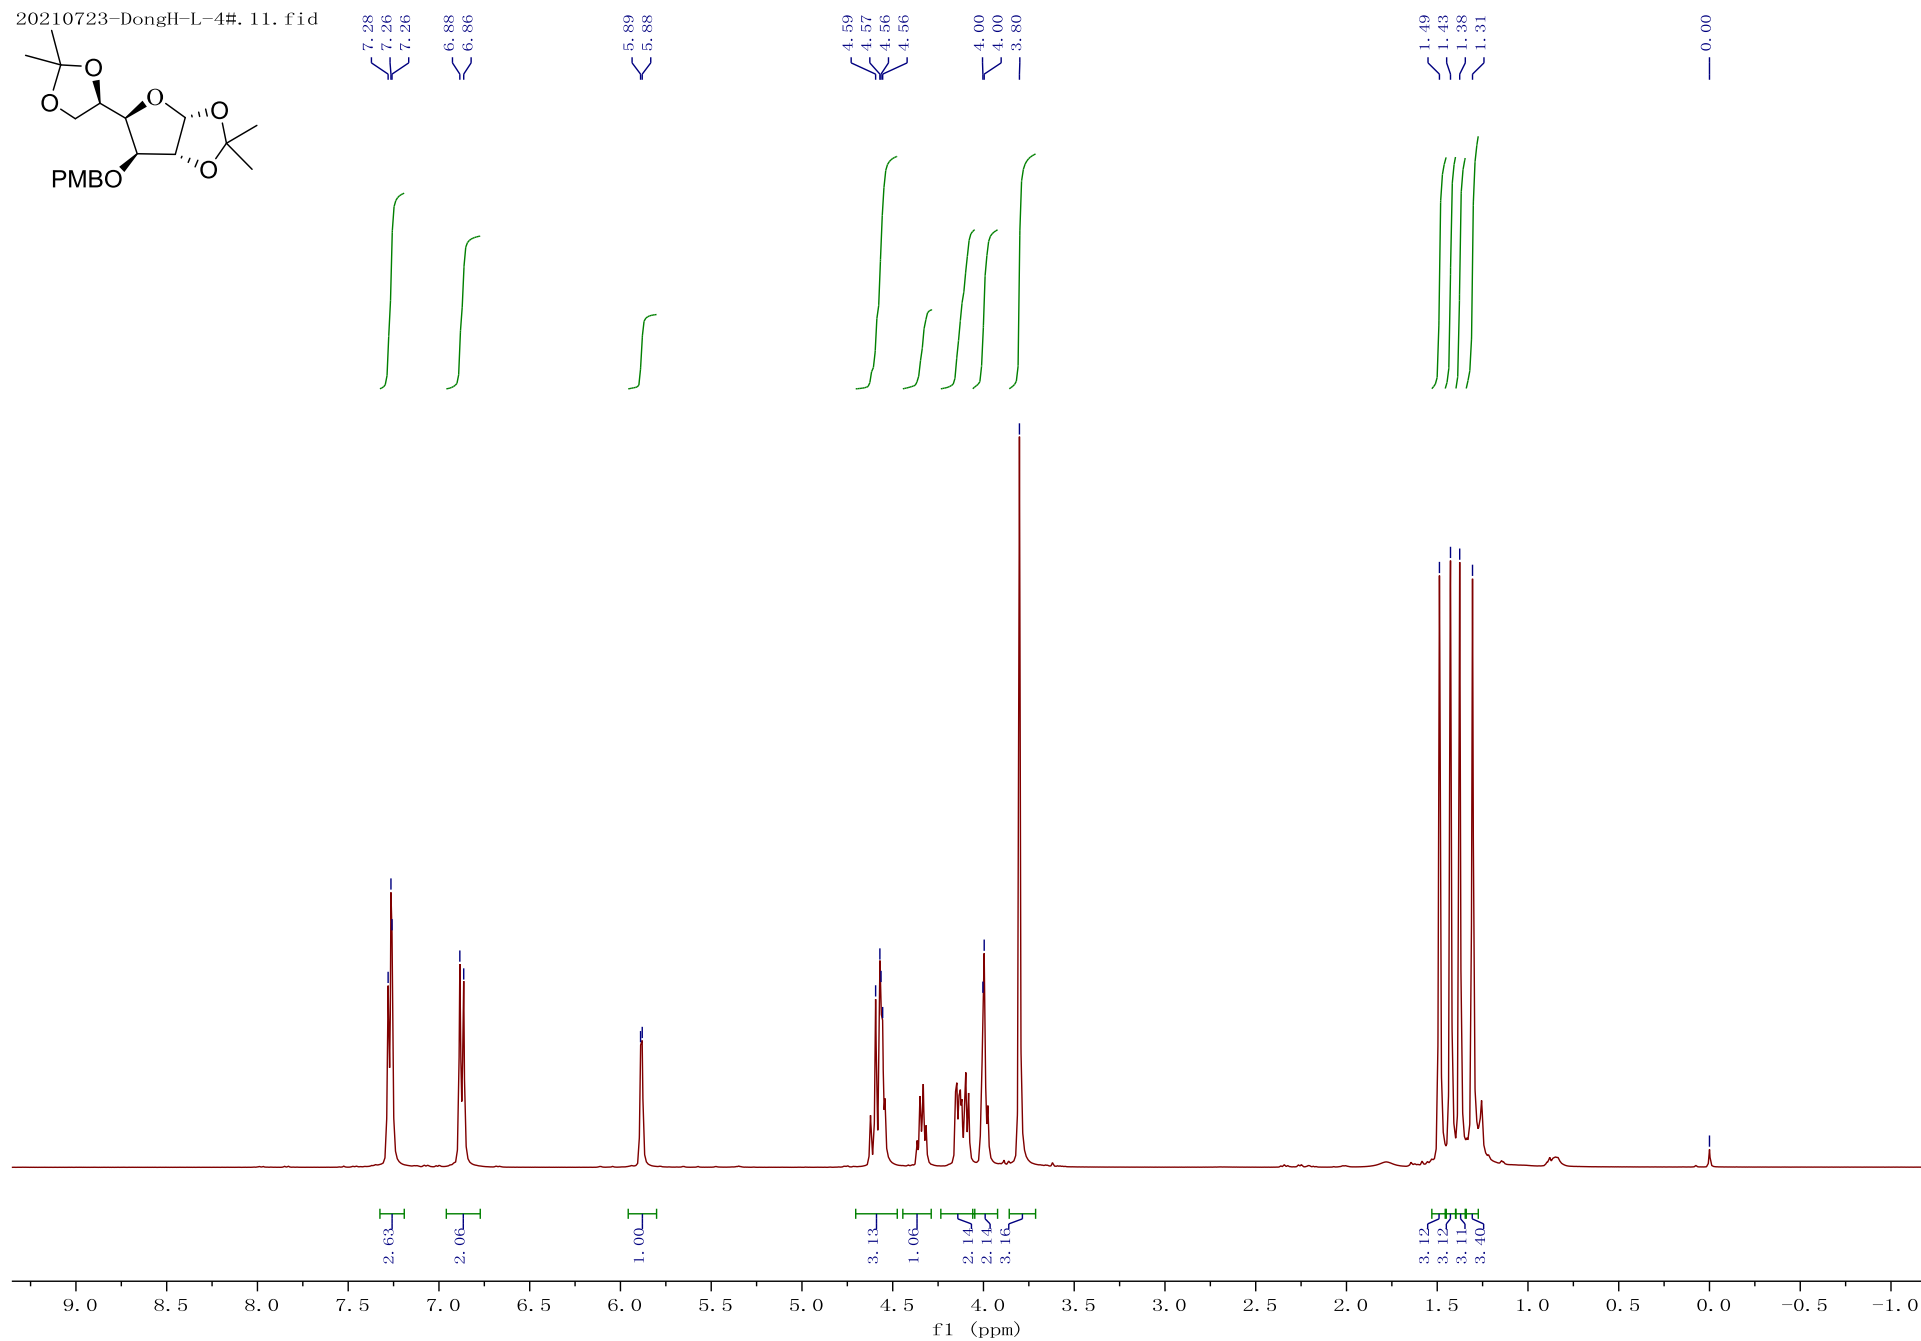

**1,2:5,6-Di-*O*-isopropylidene- $\alpha$ -D-glucofuranose 36**

20210723-DongH-L-2#. 11. fid

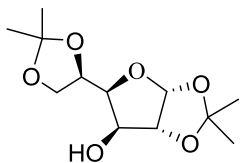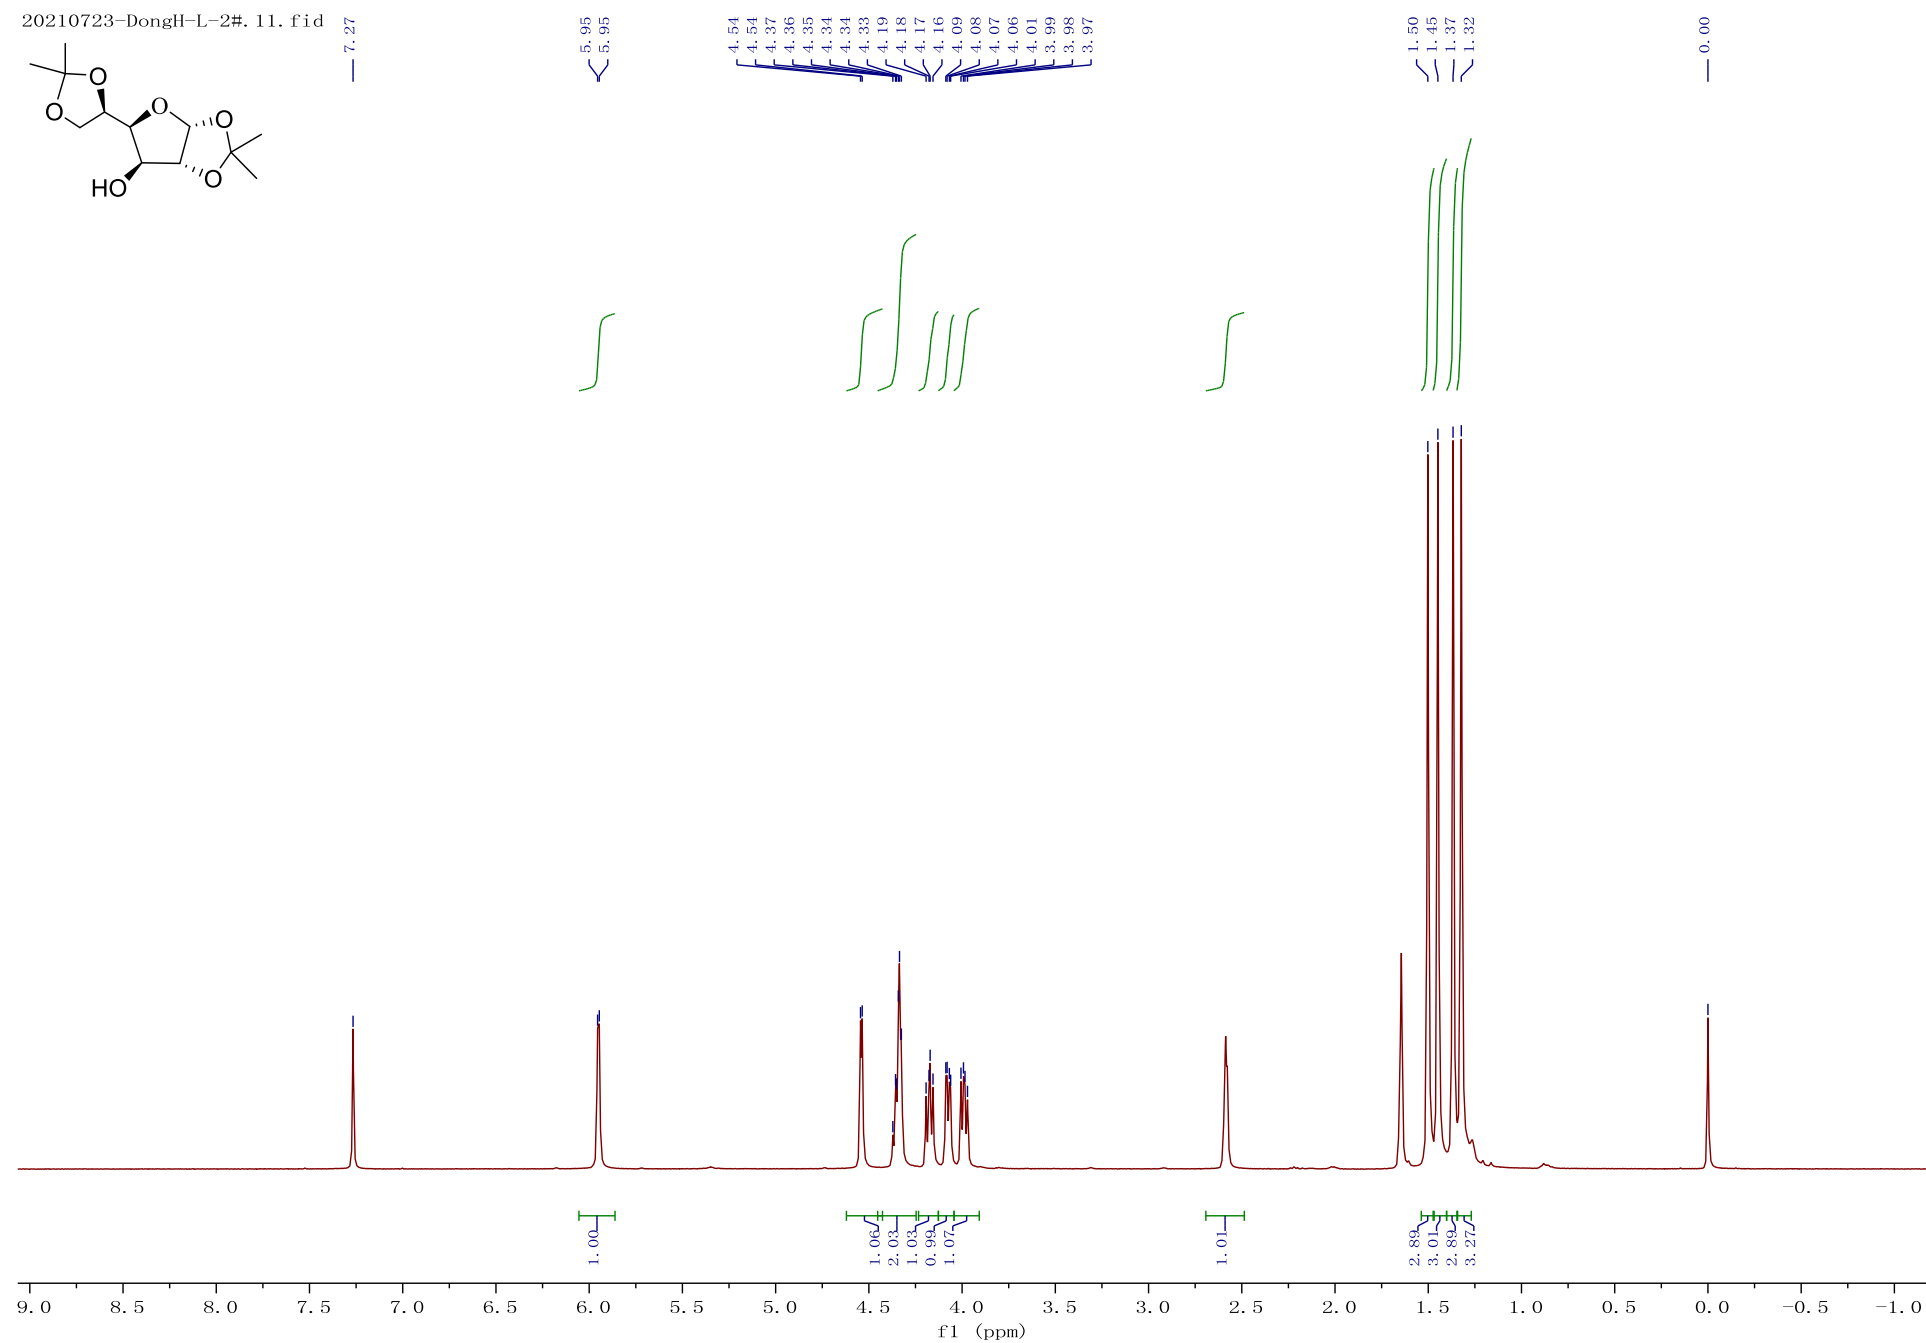

# 1,2:3,4-Di-*O*-isopropylidene-6-*O*-(*p*-methoxybenzyl)- $\alpha$ -D-galactopyranose 37

20220107-DongH-L-4#. 11. fid

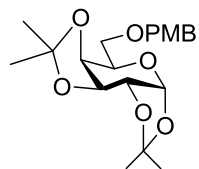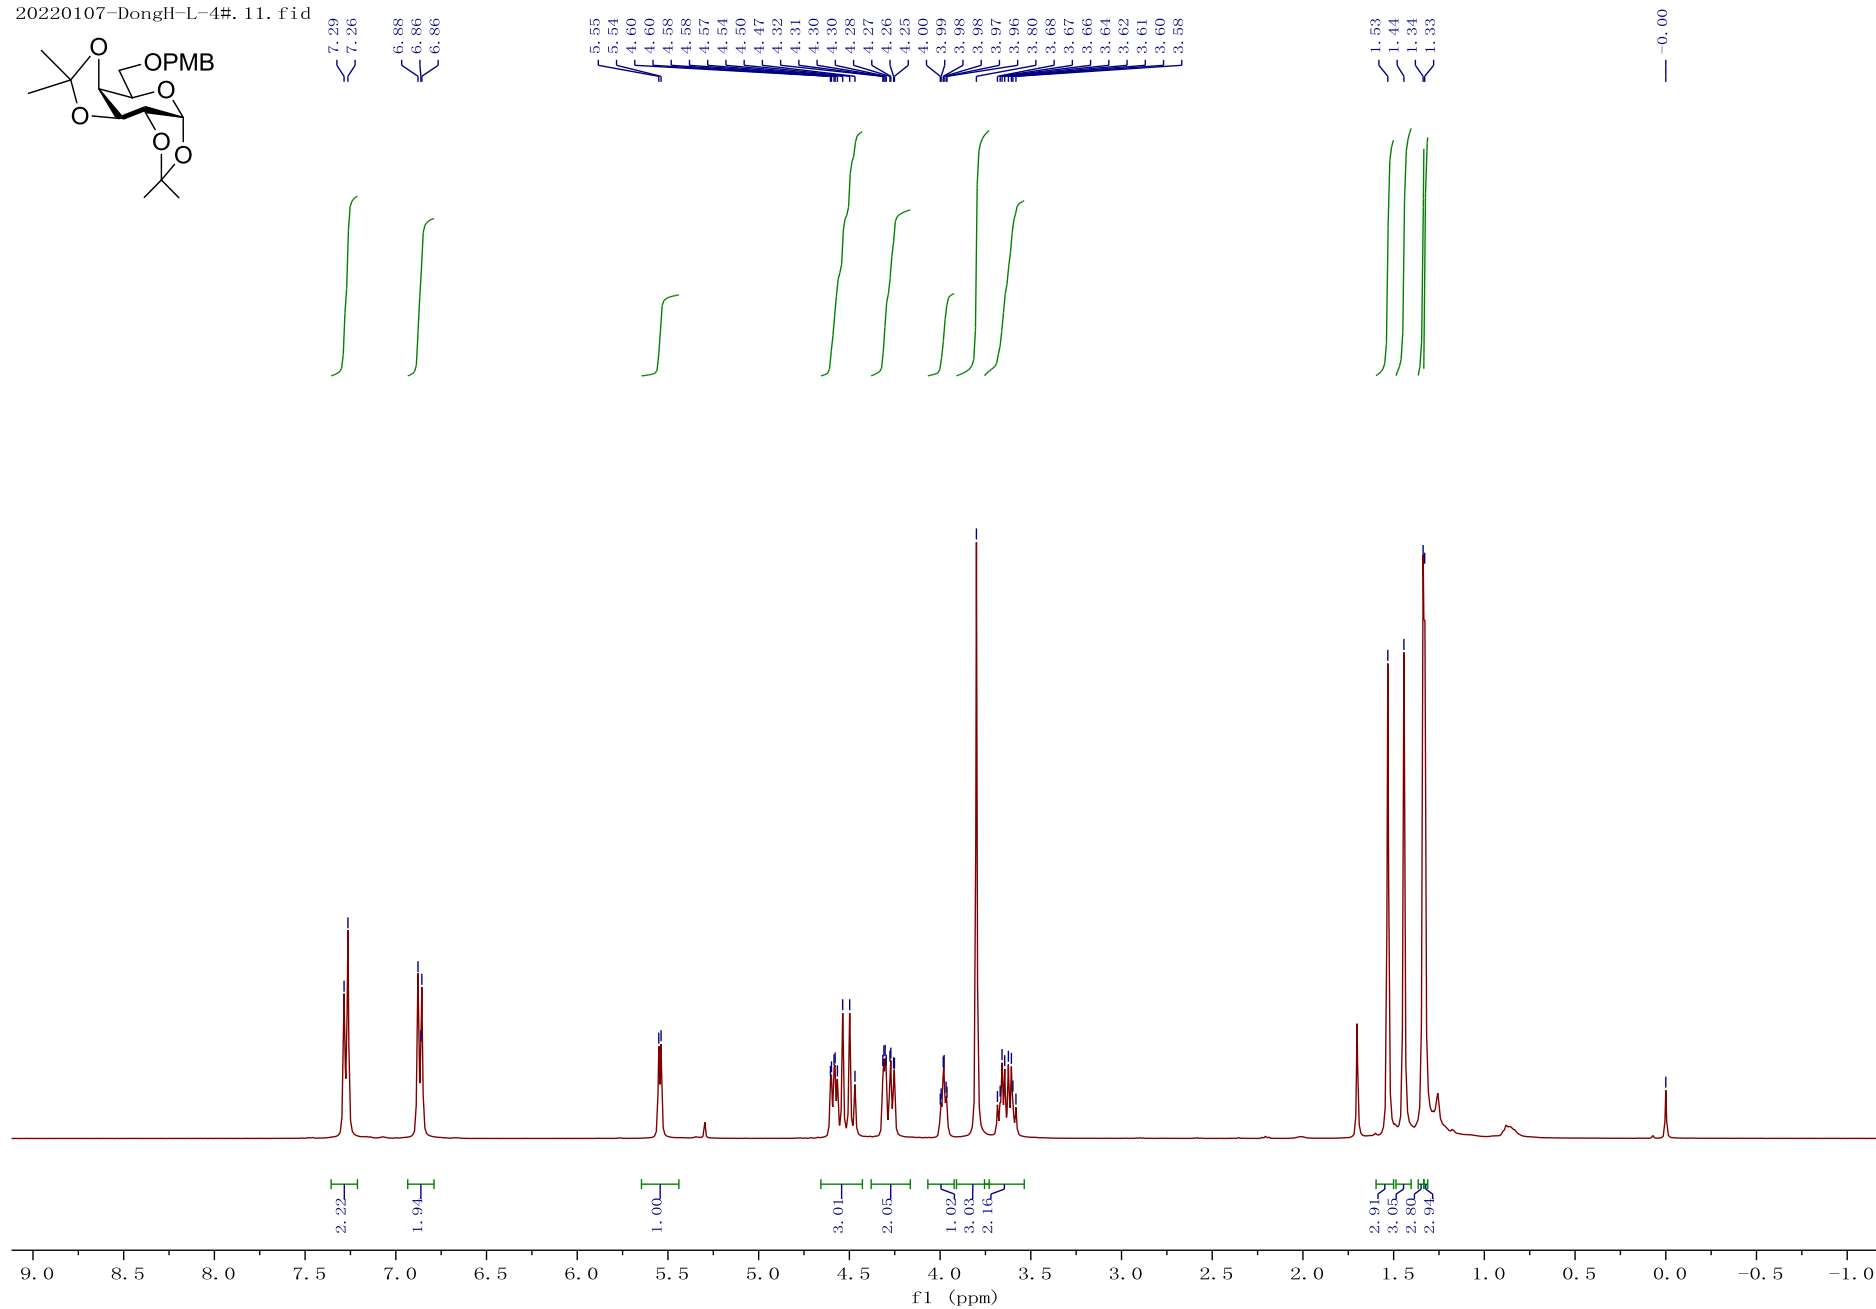

**1,2:3,4-Di-*O*-isopropylidene- $\alpha$ -D-galactopyranose 38**

20220107-DongH-L-7#. 11. fid

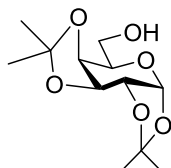

7.28

5.58  
5.57

4.63  
4.63  
4.61  
4.61  
4.35  
4.35  
4.34  
4.33  
4.29  
4.29  
4.27  
4.27  
3.88  
3.85  
3.84  
3.76  
3.75  
3.74

— 2.28

1.54  
1.46

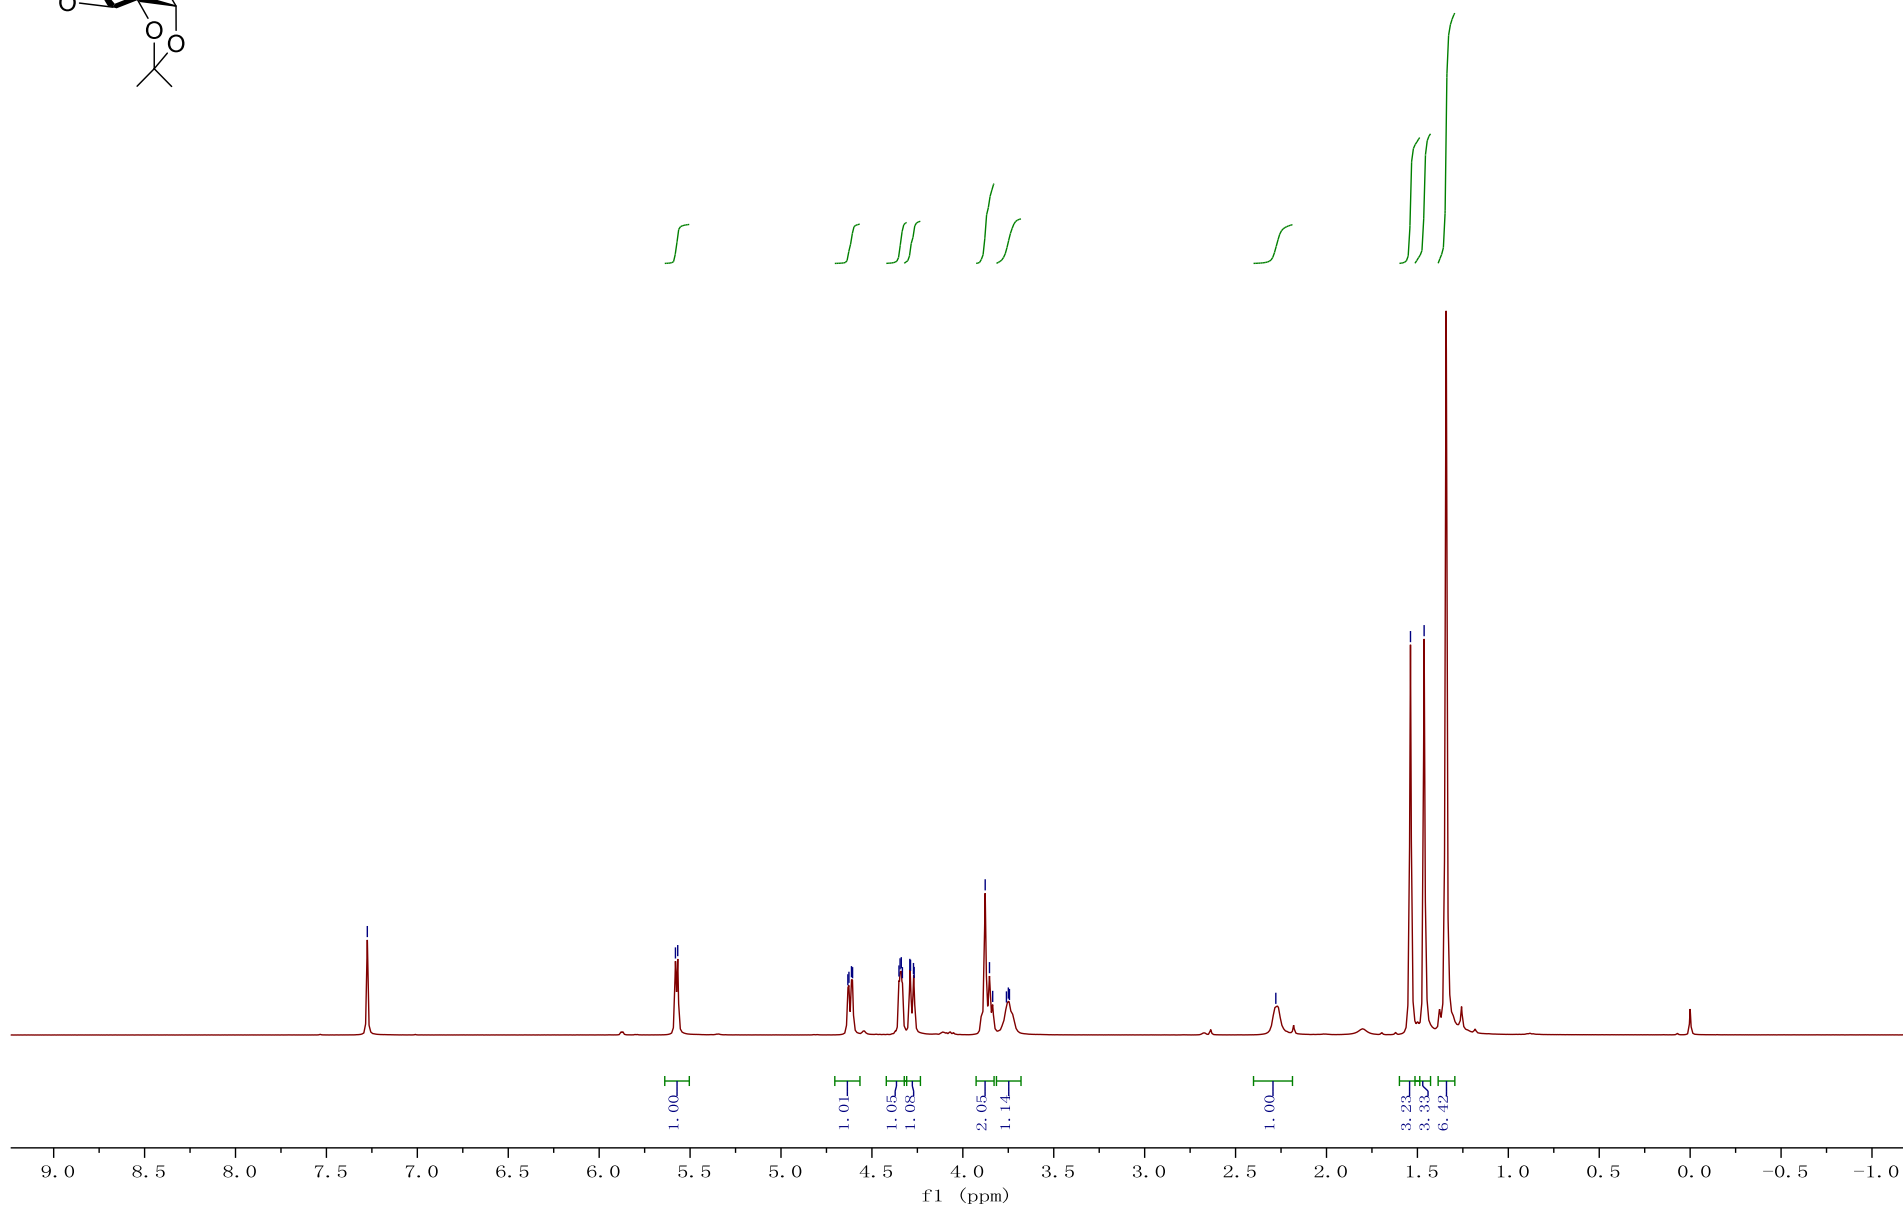

S60

Methyl 2,3-di-O-benzyl-4,6-O-benzylidene- $\alpha$ -D-mannopyranoside 39

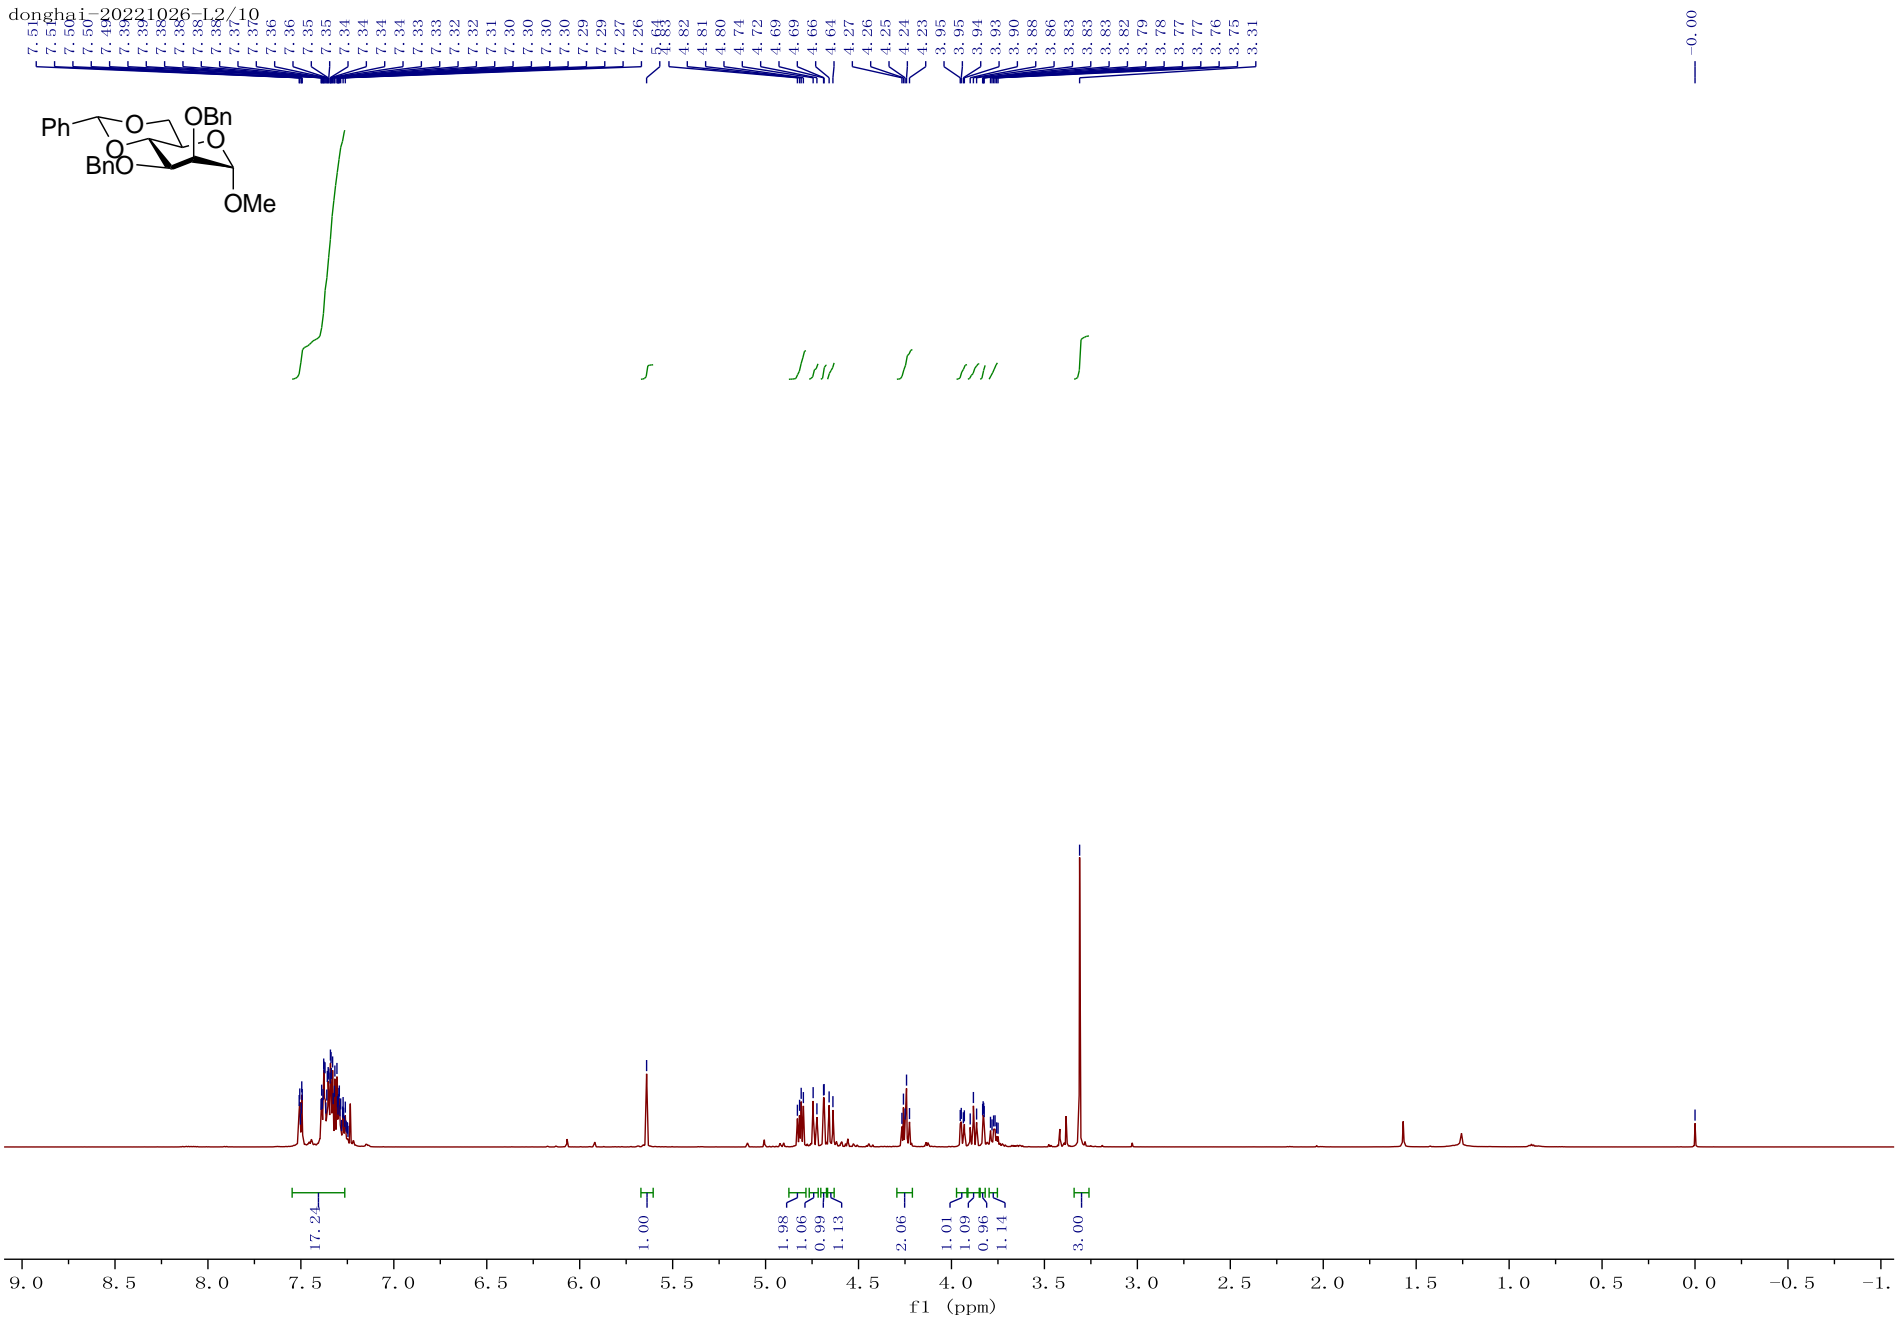

# Methyl 2,3-di-*O*-benzyl-4,6-*O*-benzylidene- $\beta$ -D-glucopyranoside 40

donghai-20221026-L13-10

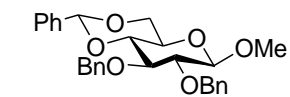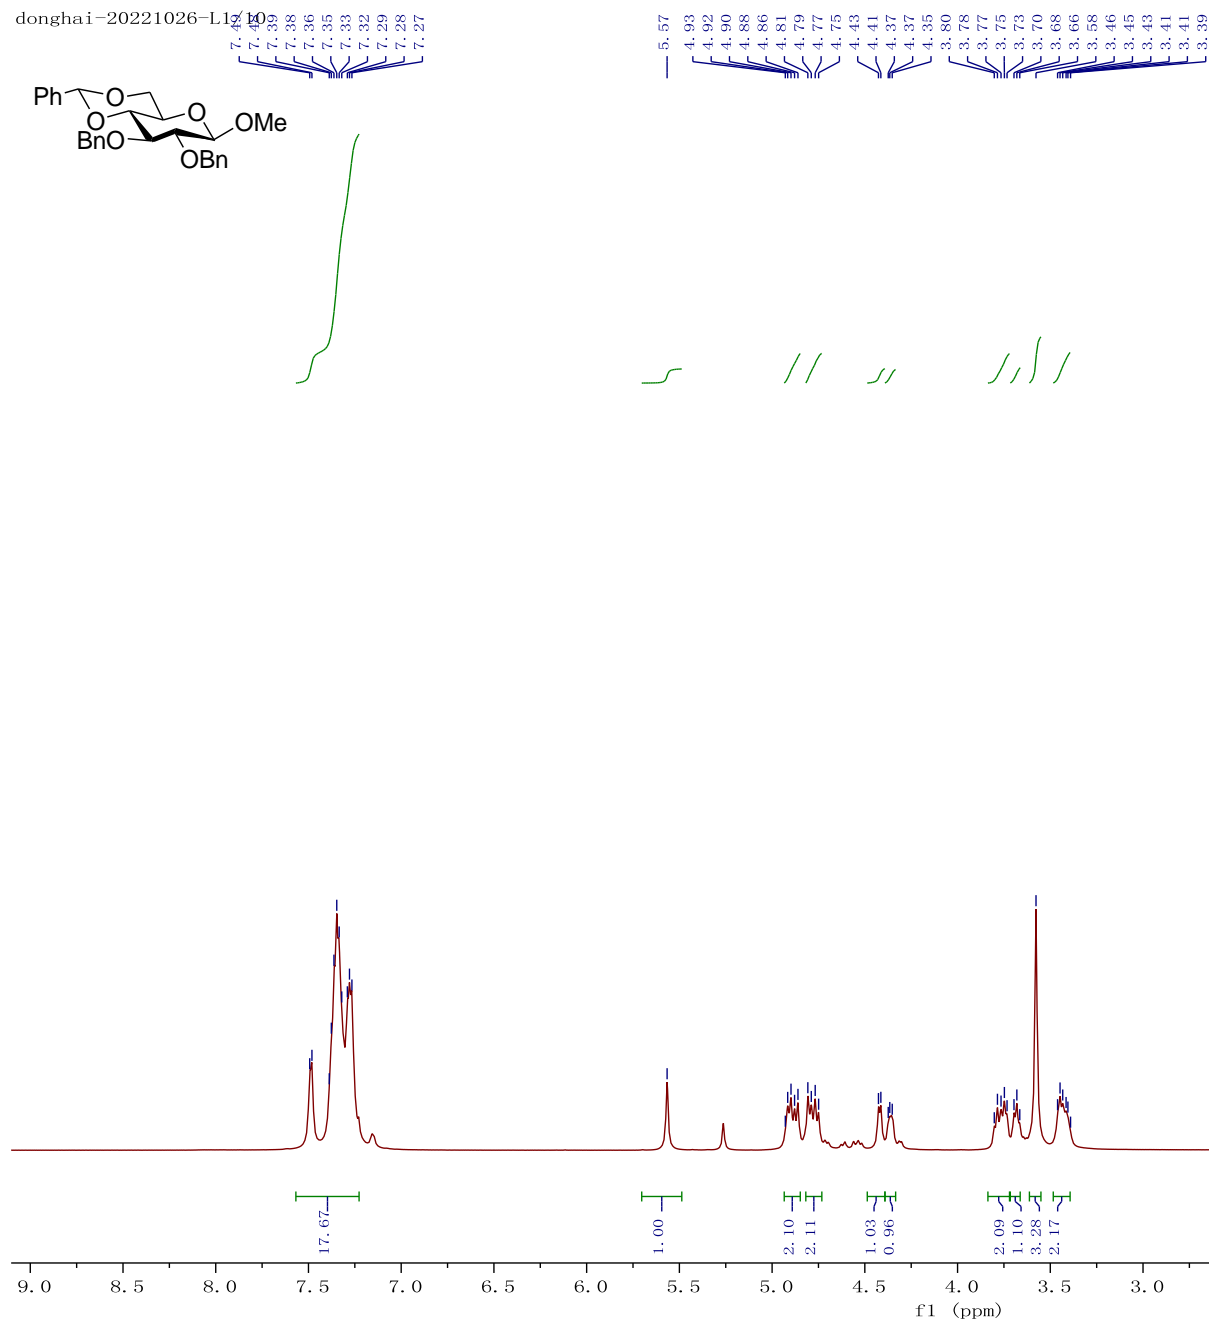

# Methyl 2,3-di-*O*-benzyl-4,6-di-*O*-acetyl- $\alpha$ -D-galactopyranoside 41

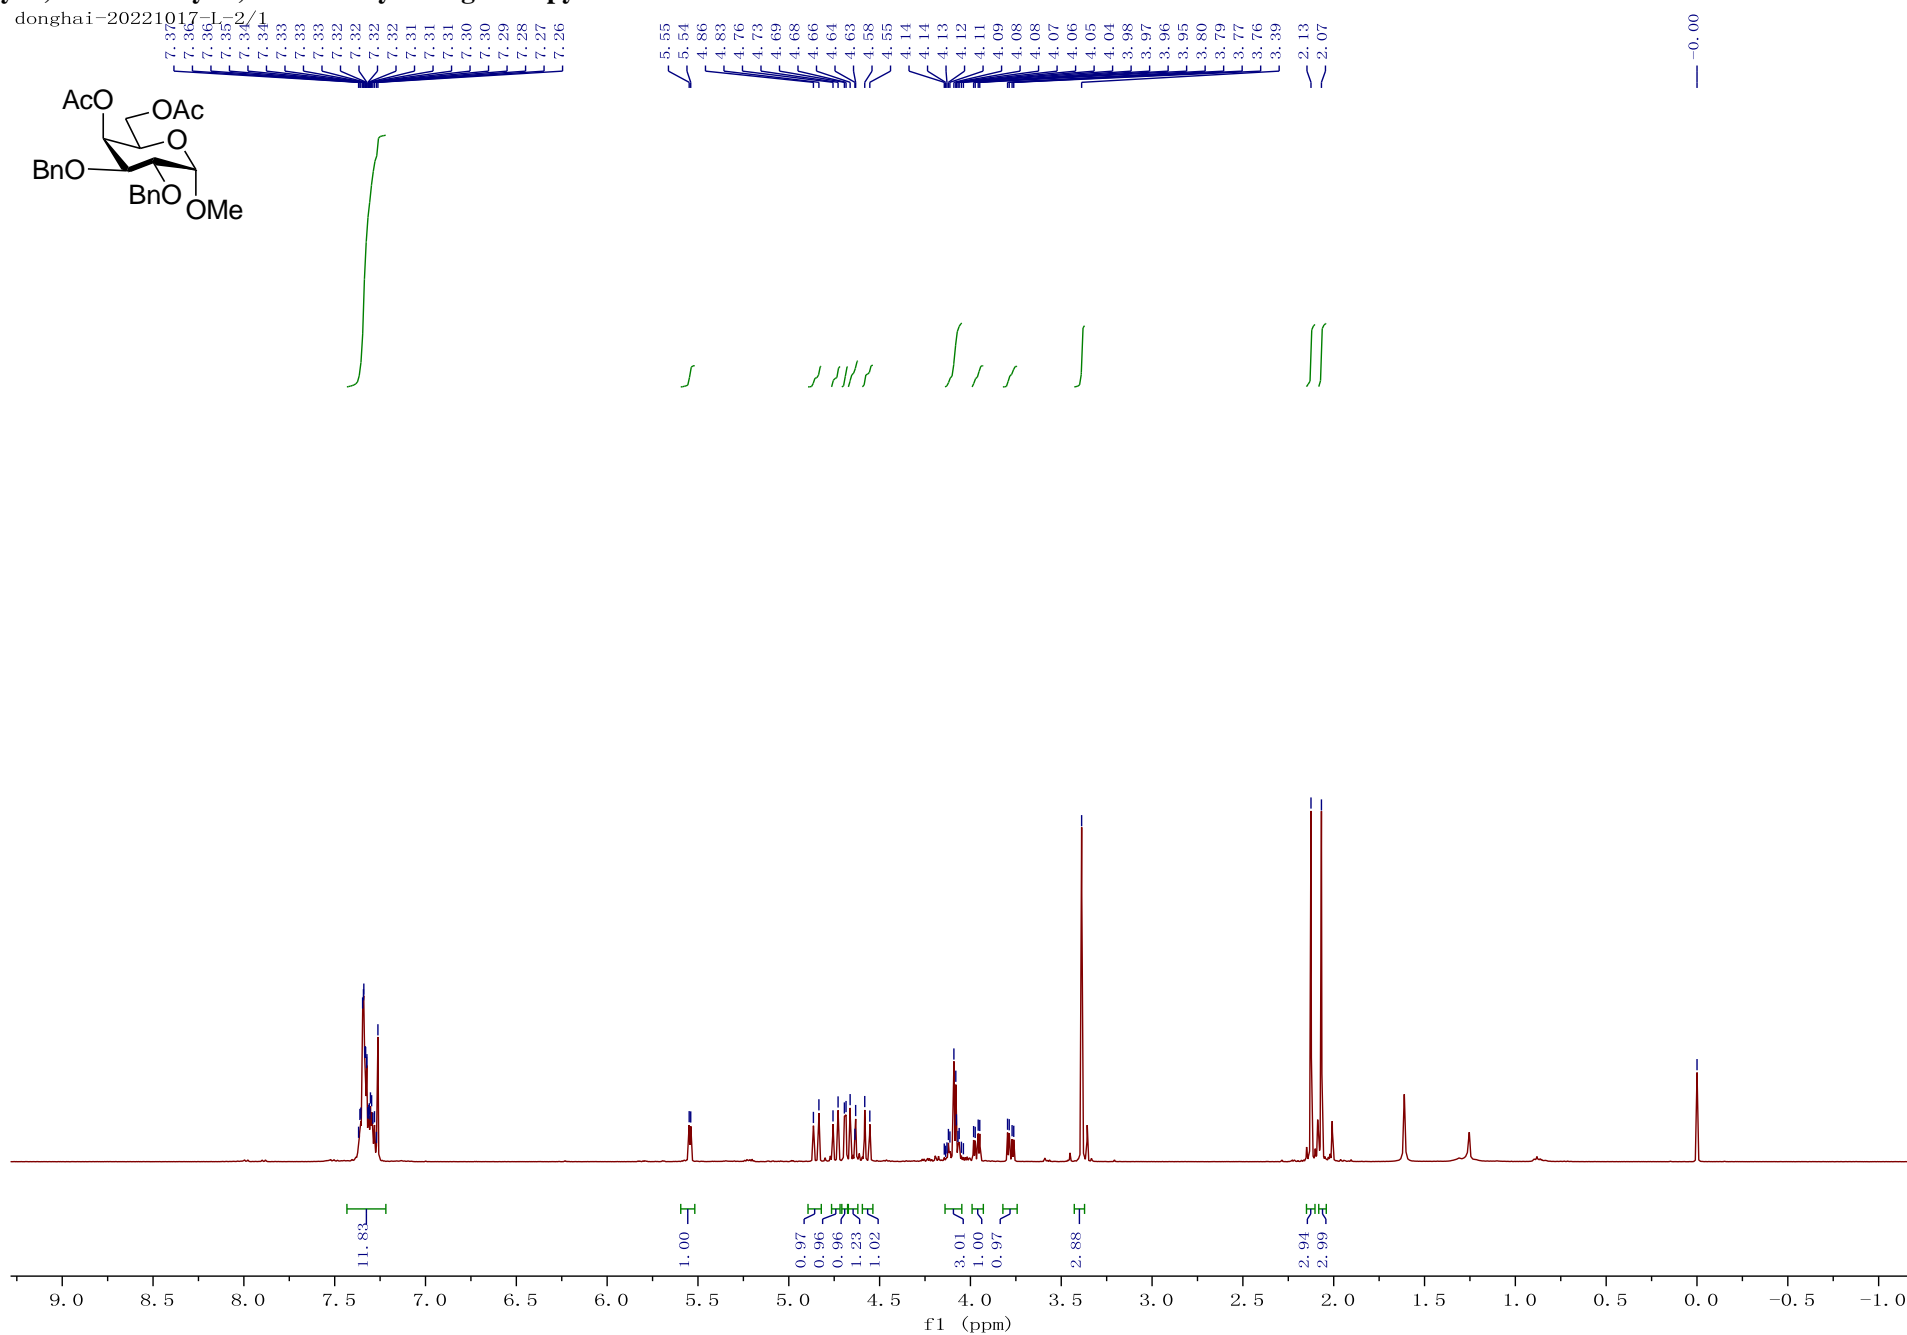

# Methyl 2,3-di-*O*-benzyl-4,6-di-*O*-acetyl- $\alpha$ -D-mannopyranoside 42

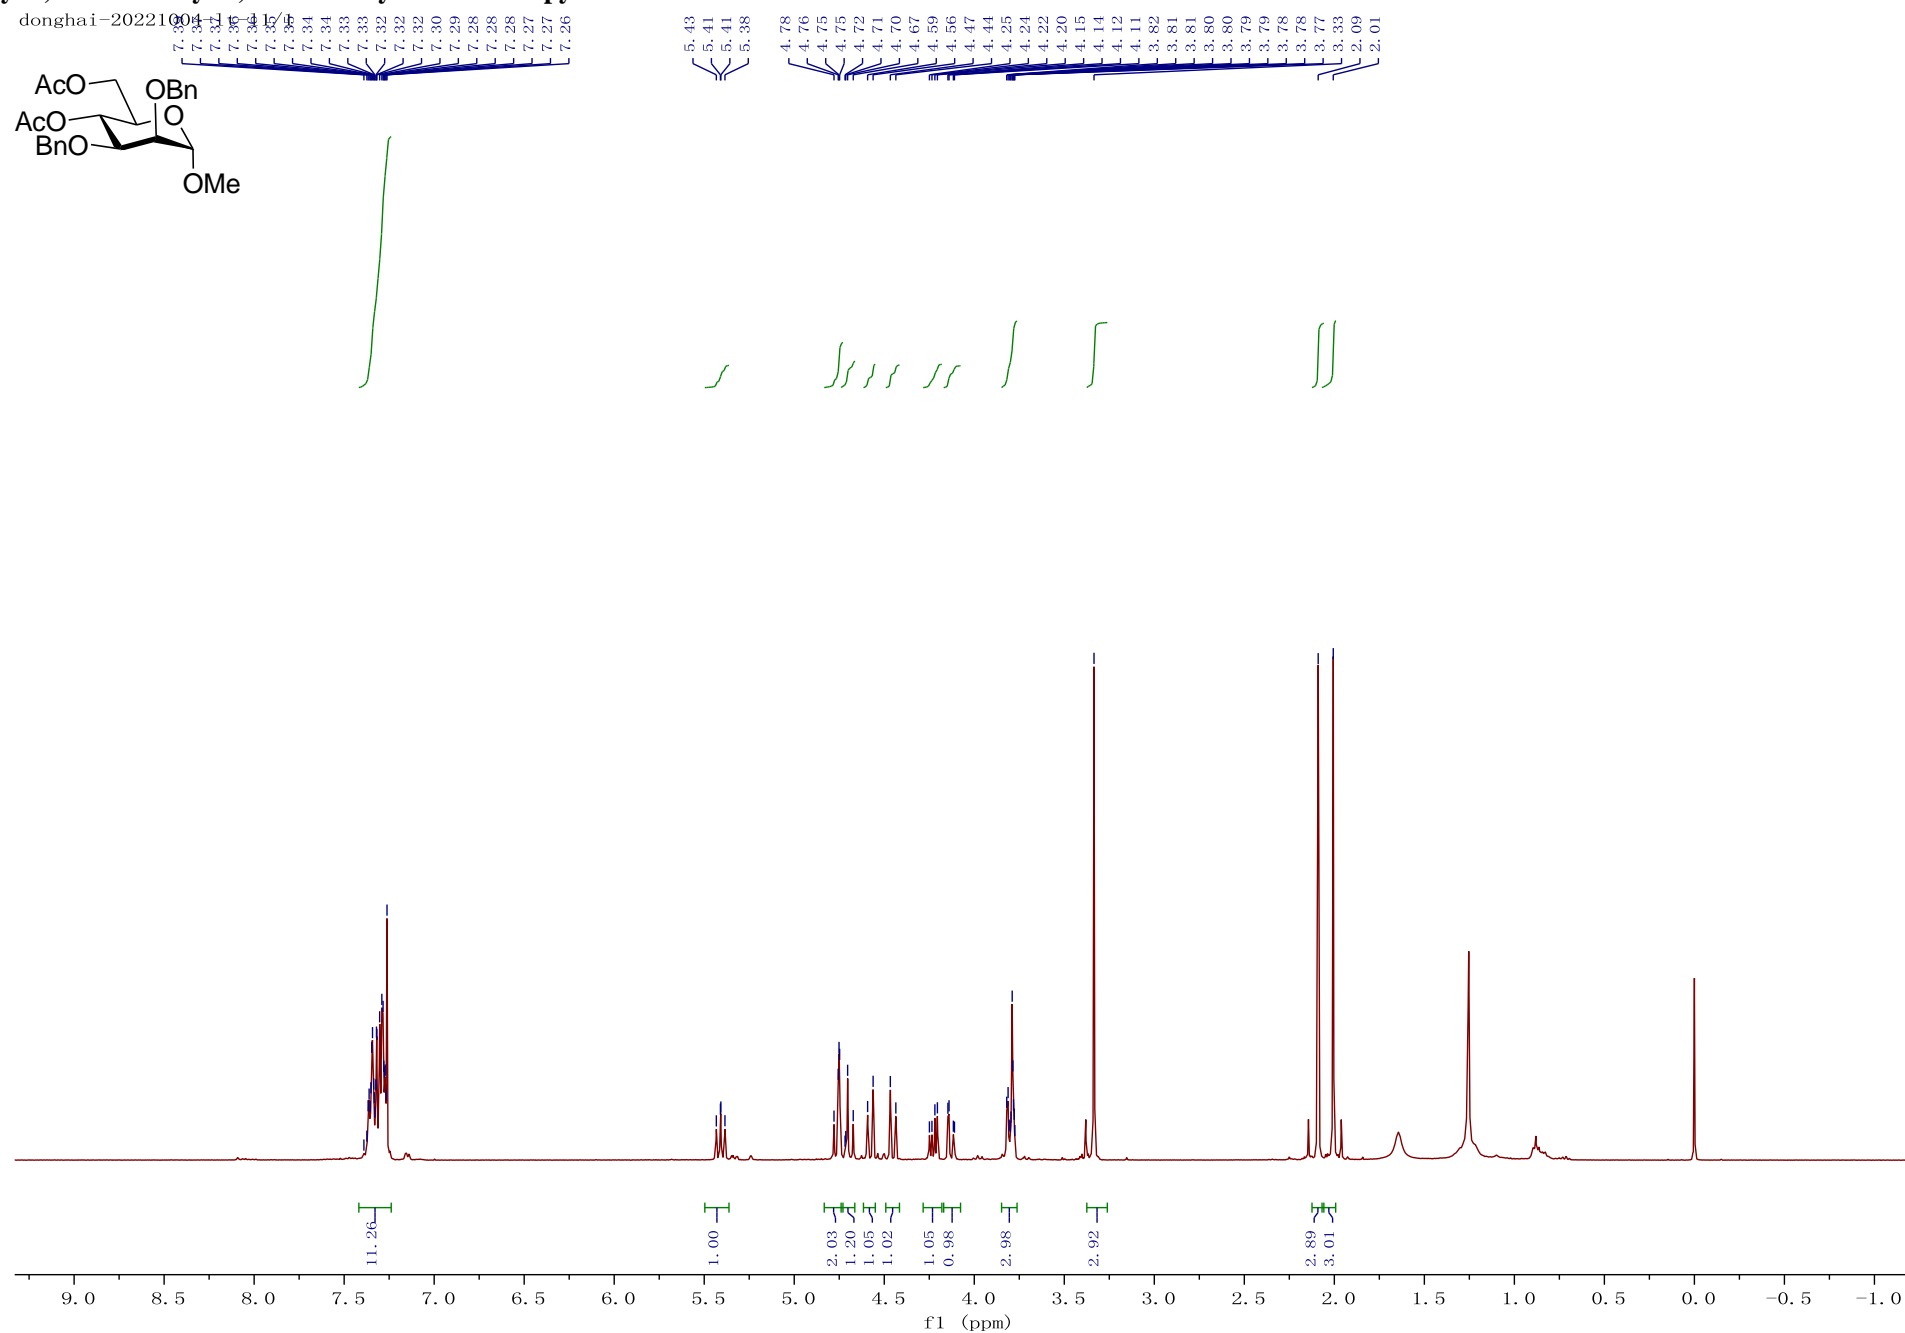



Methyl 2,3-di-O-benzyl-4,6-di-O-acetyl- $\alpha$ -D-mannopyranoside 42

donghai-20221014-L2/1

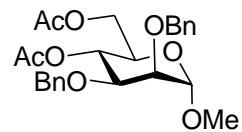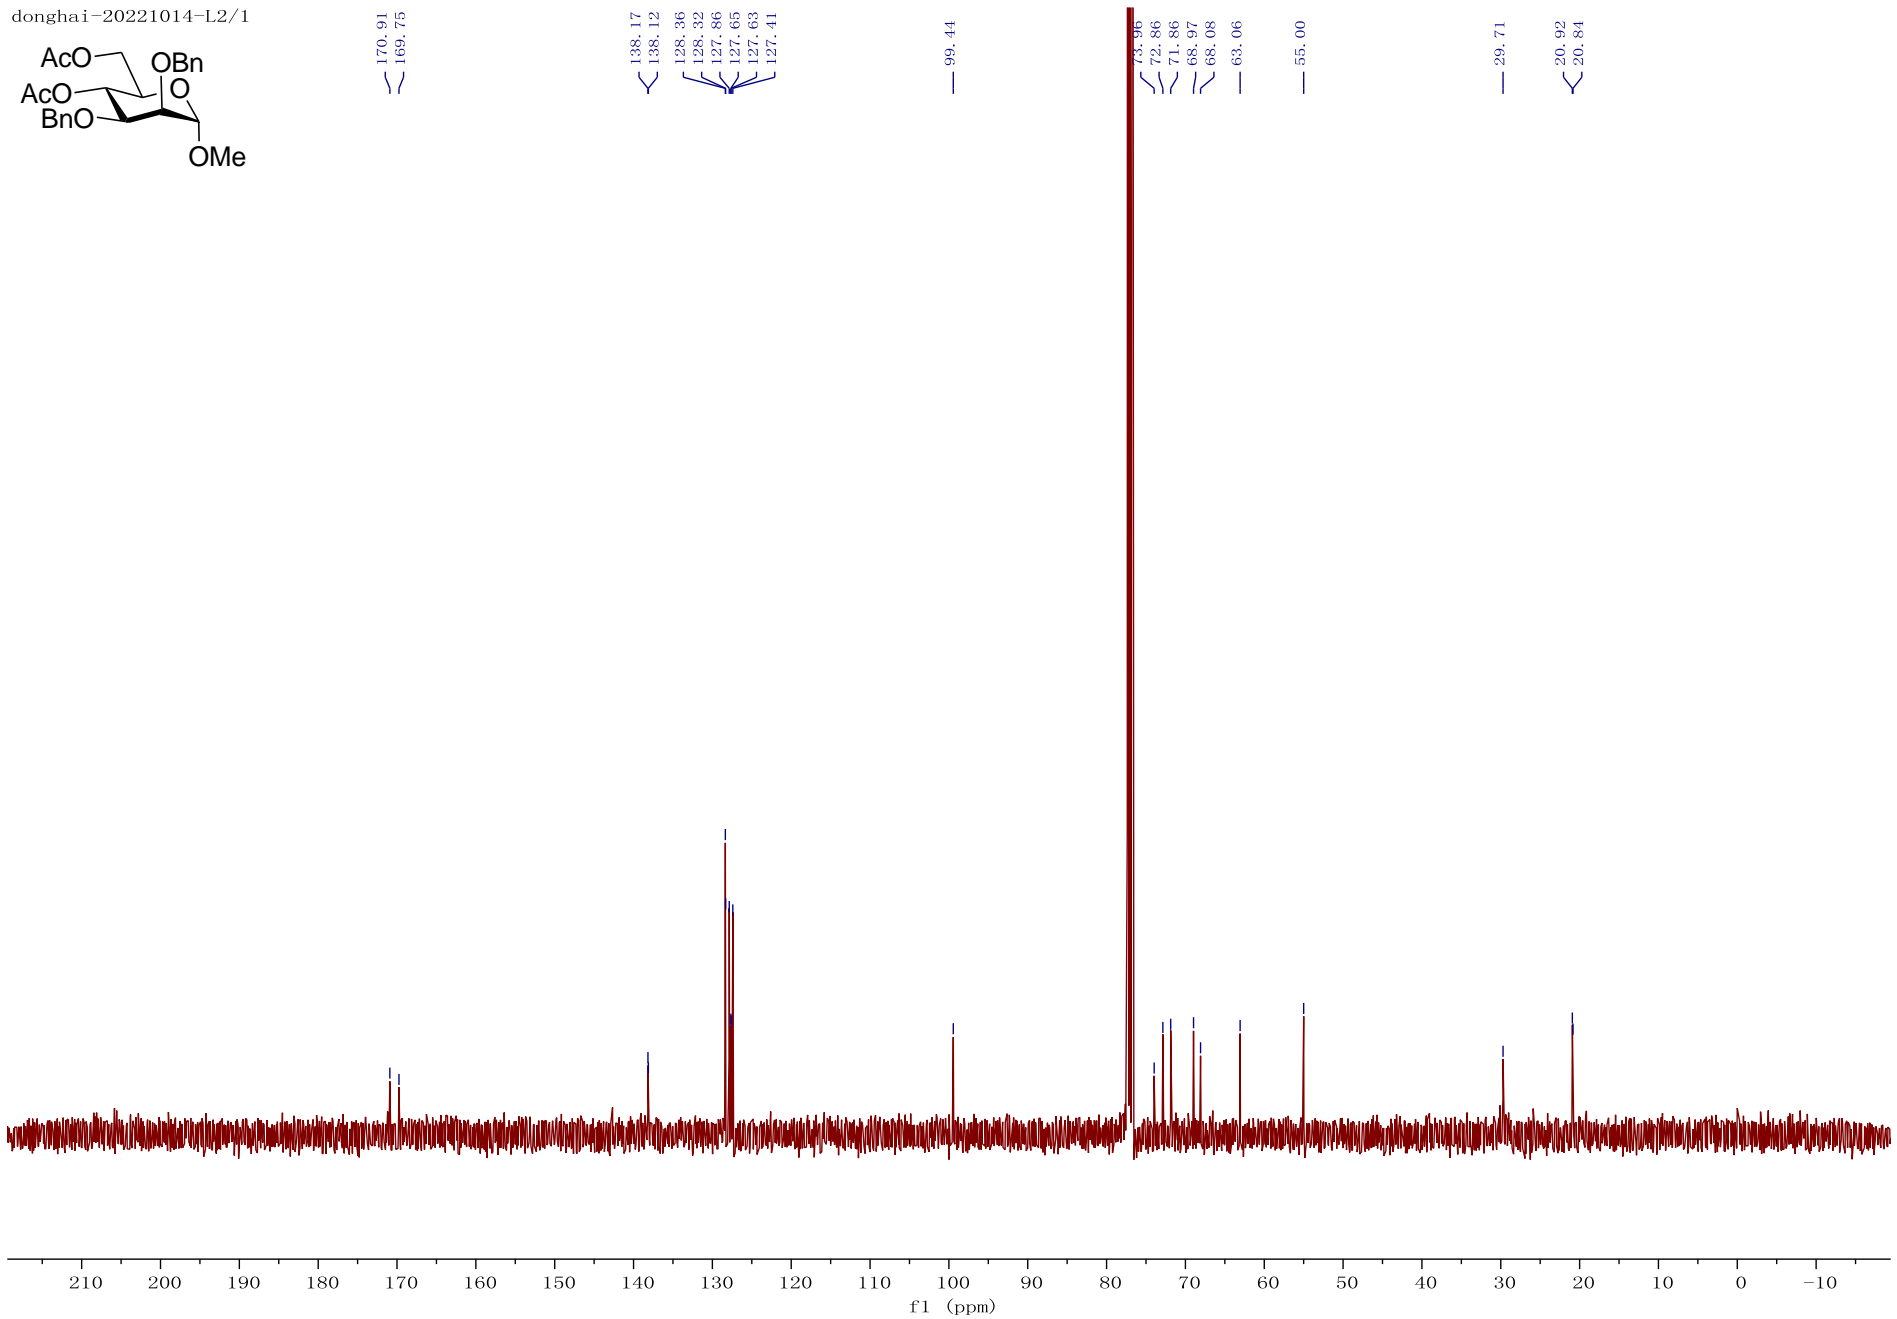

**Methyl 2,3-di-*O*-benzyl-4,6-di-*O*-acetyl- $\beta$ -D-glucopyranoside 43**

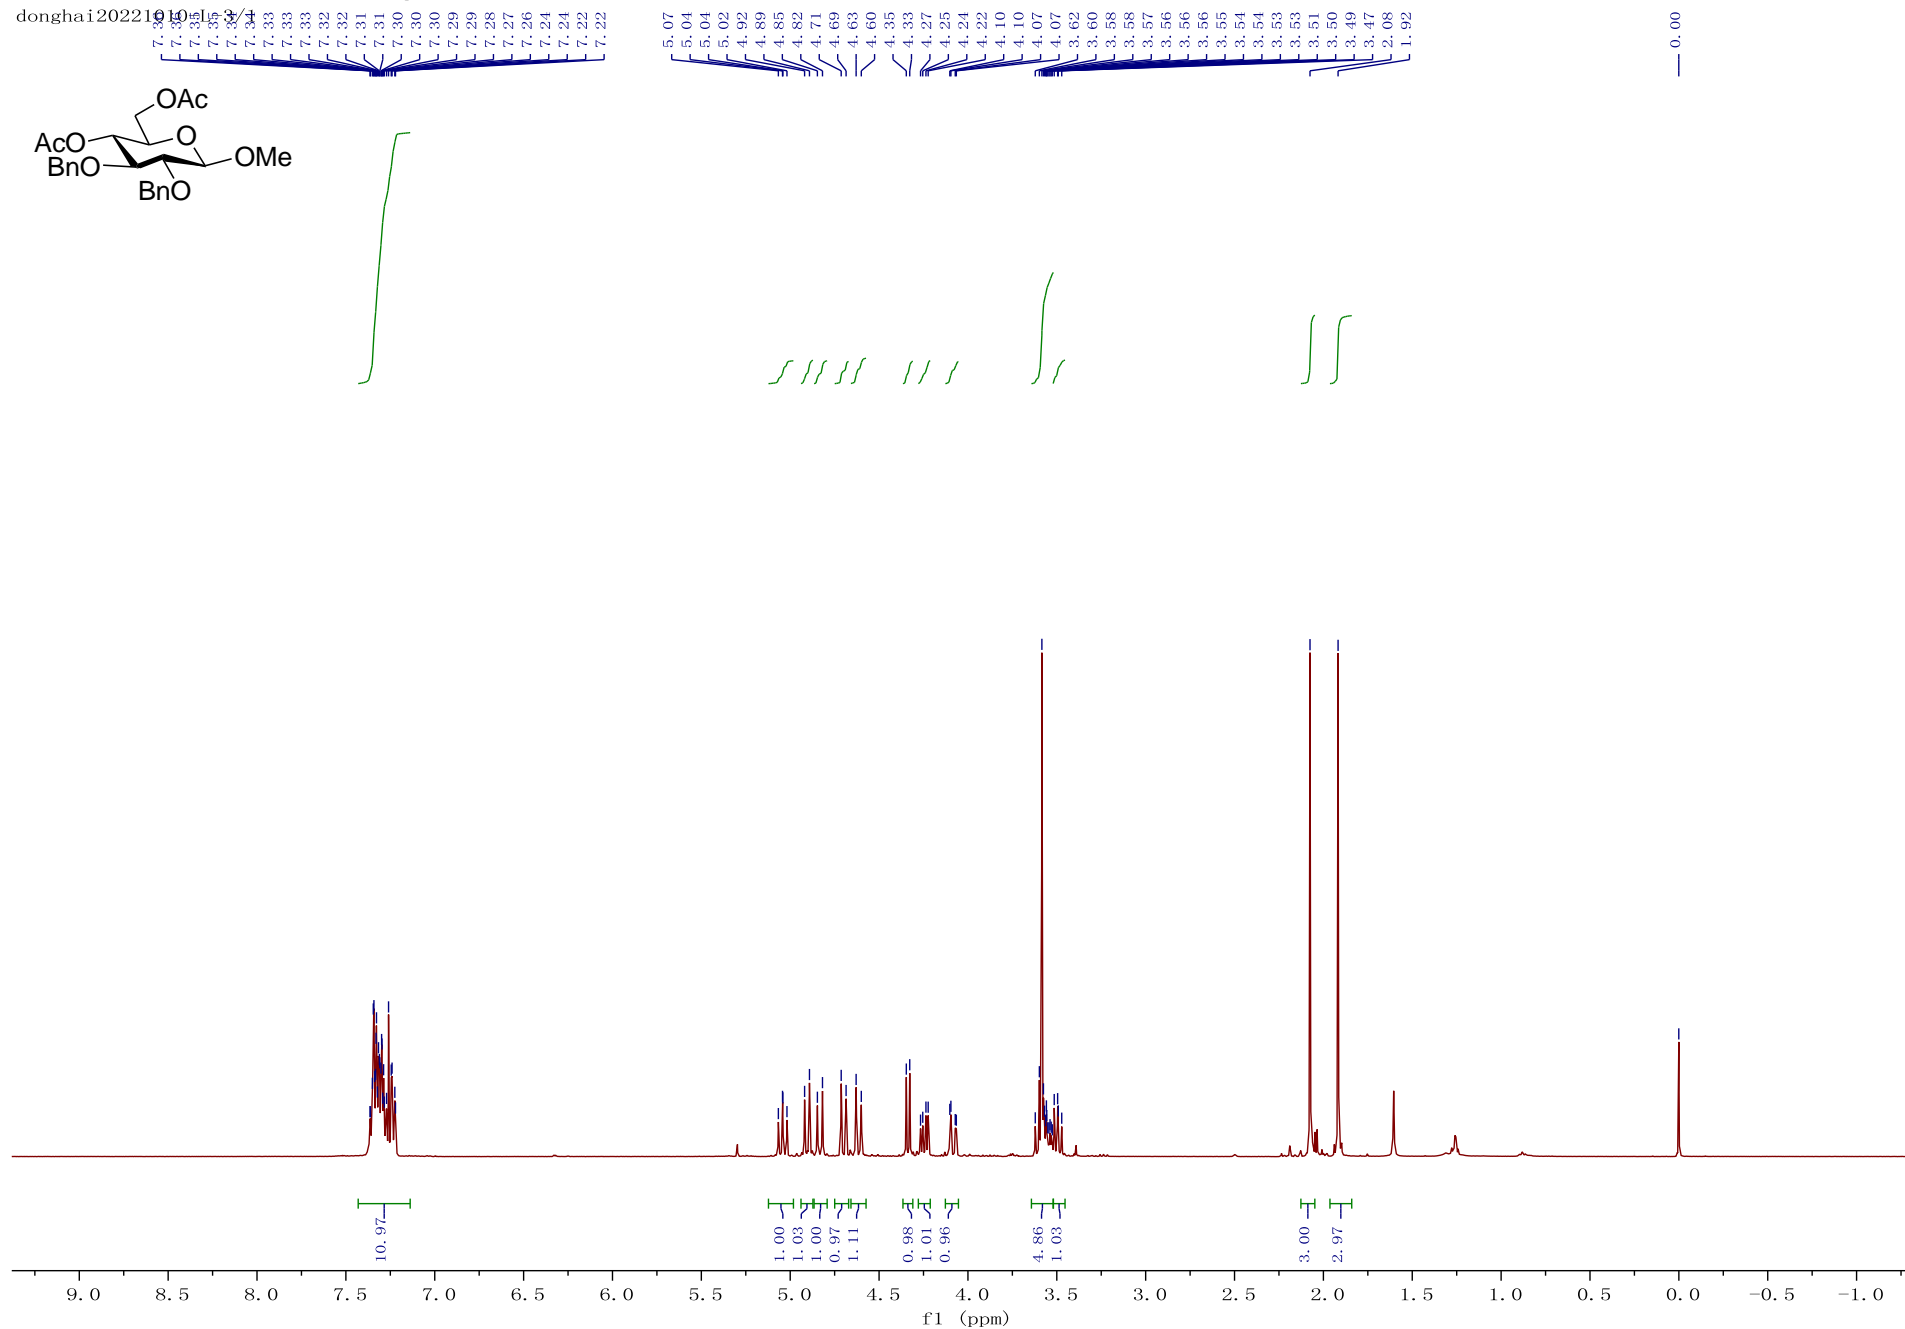

Methyl 2,3-di-O-benzyl-4,6-di-O-acetyl-β-D-glucopyranoside 43

donghai-20221014-L1/1

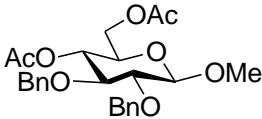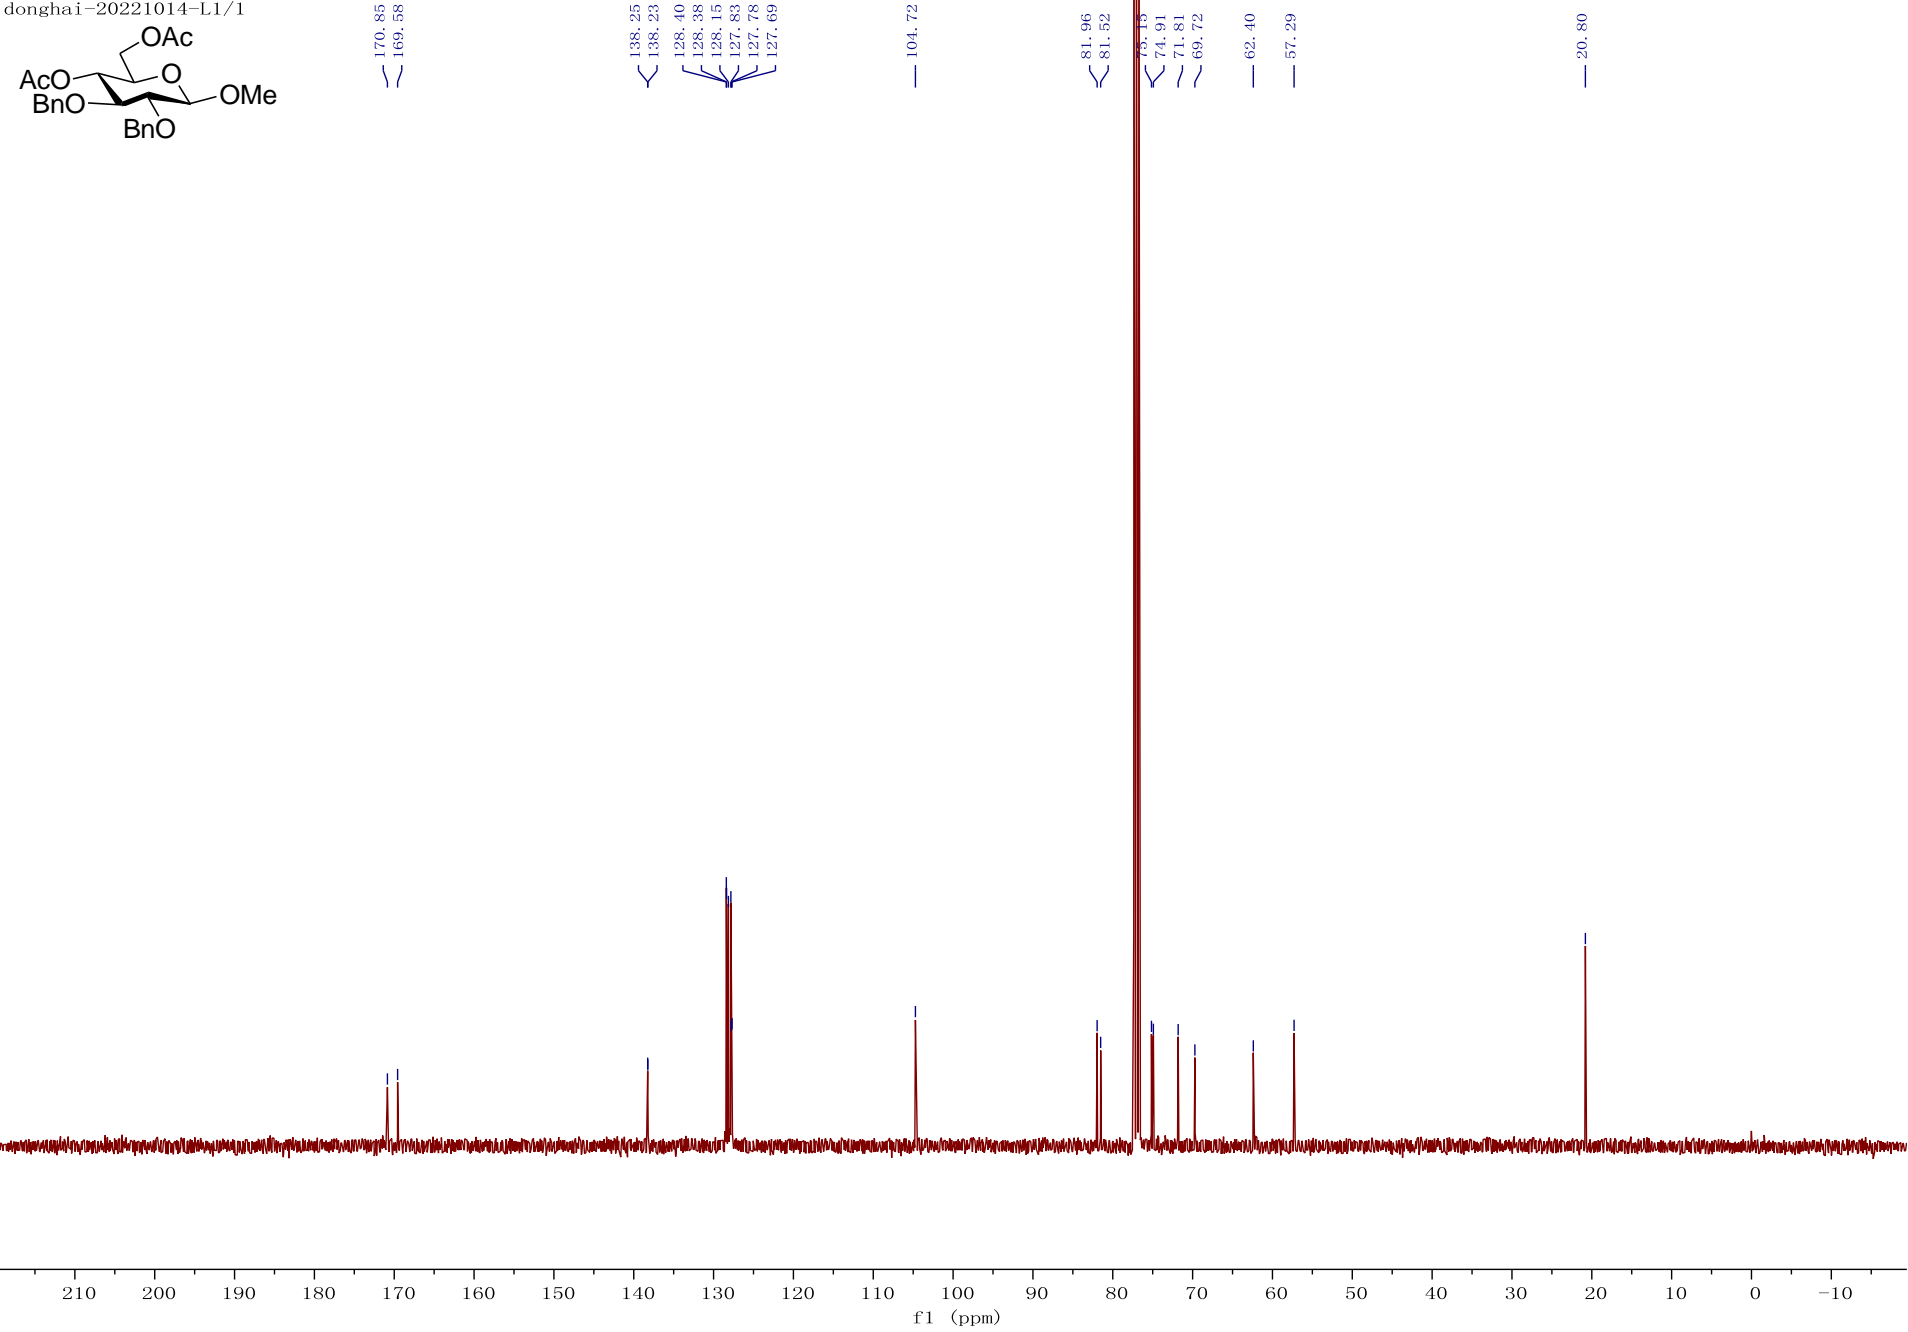

# Methyl 2,3-di-*O*-benzyl-6-acetyl- $\alpha$ -D-glucopyranoside 44

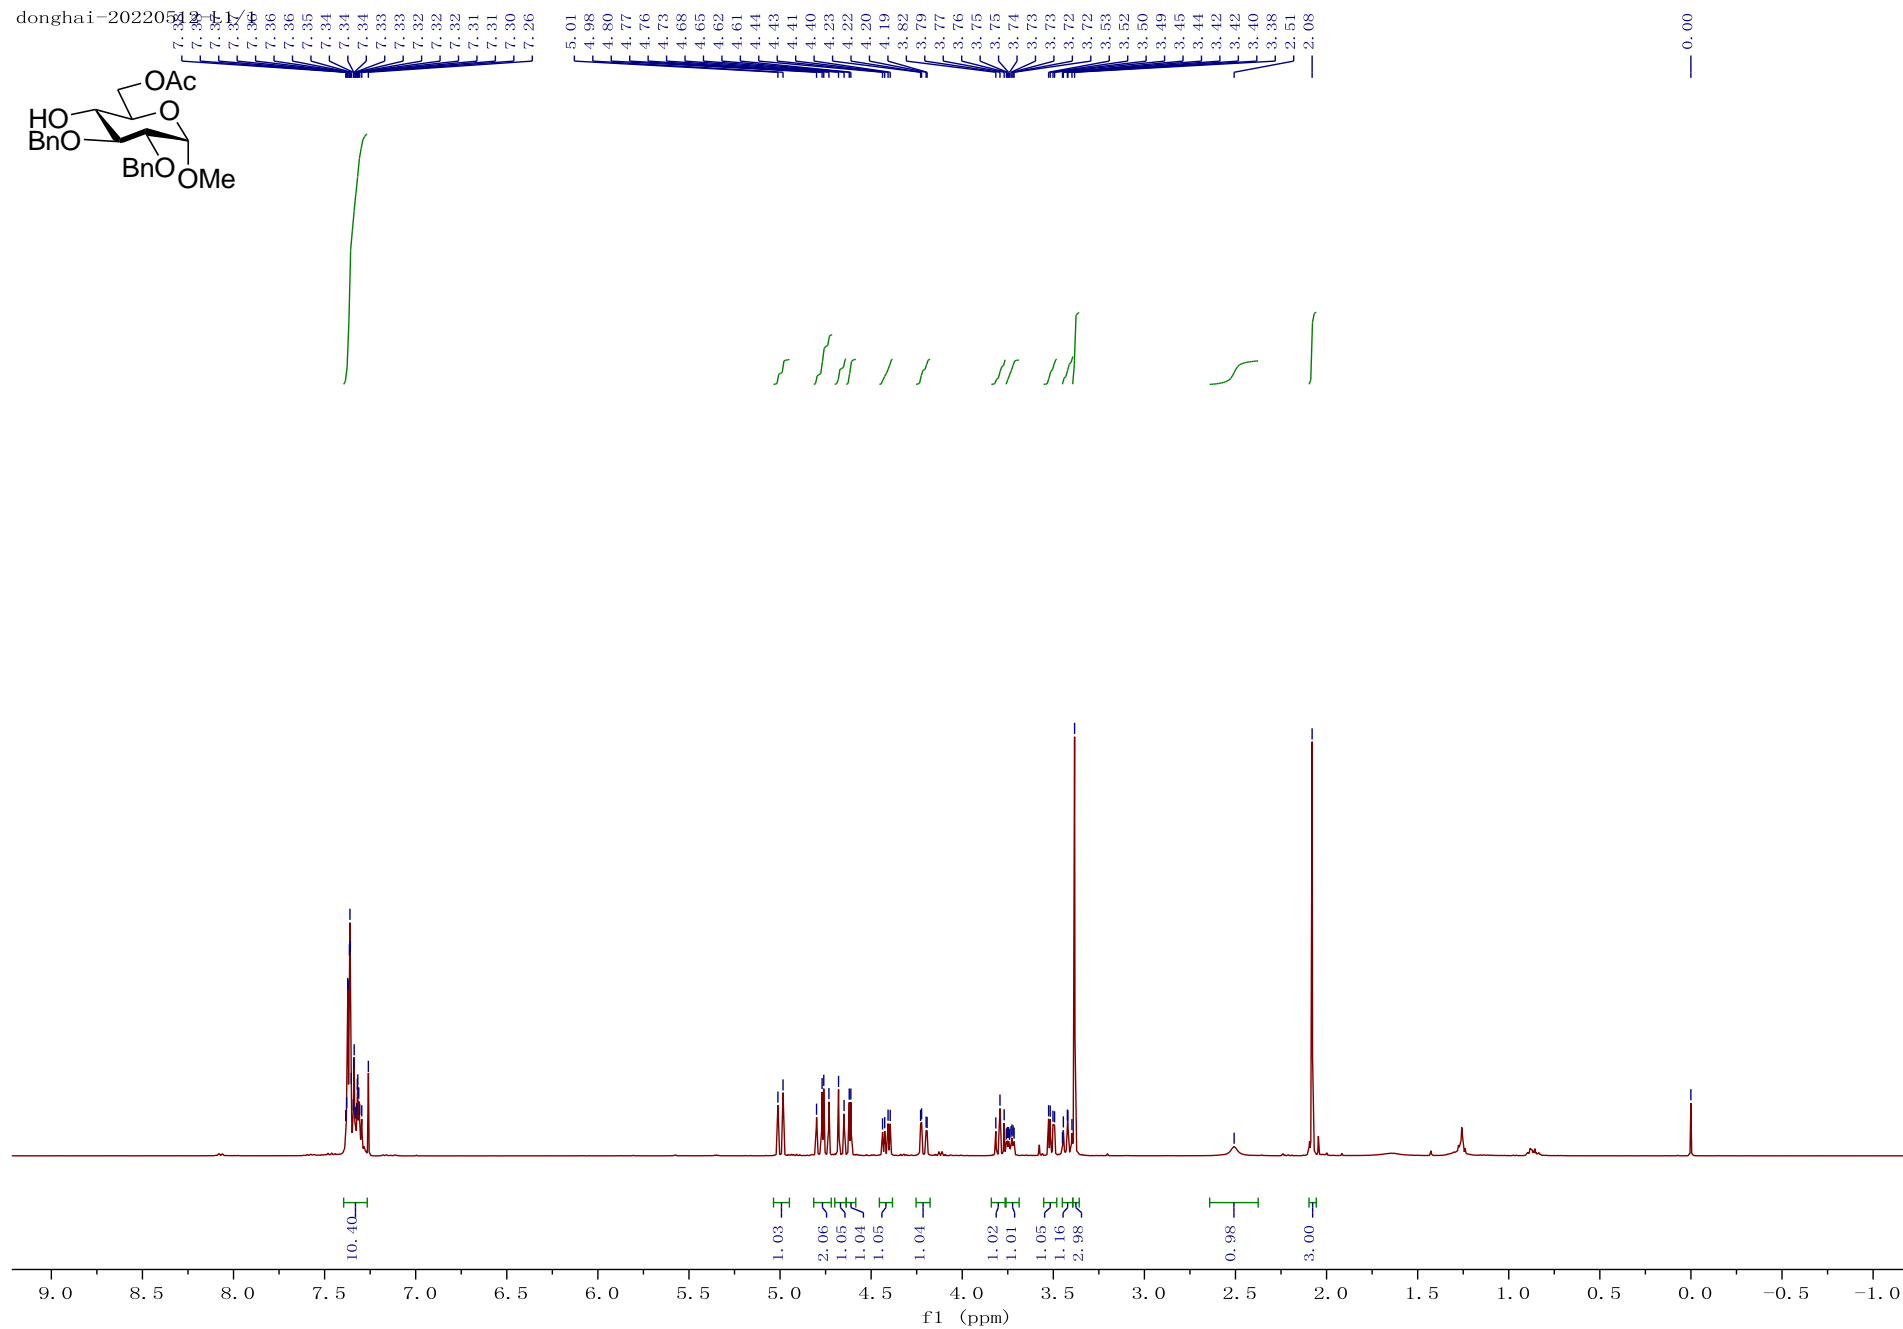

Methyl 2,3-di-O-benzyl-6-acetyl- $\alpha$ -D-galactopyranoside 45

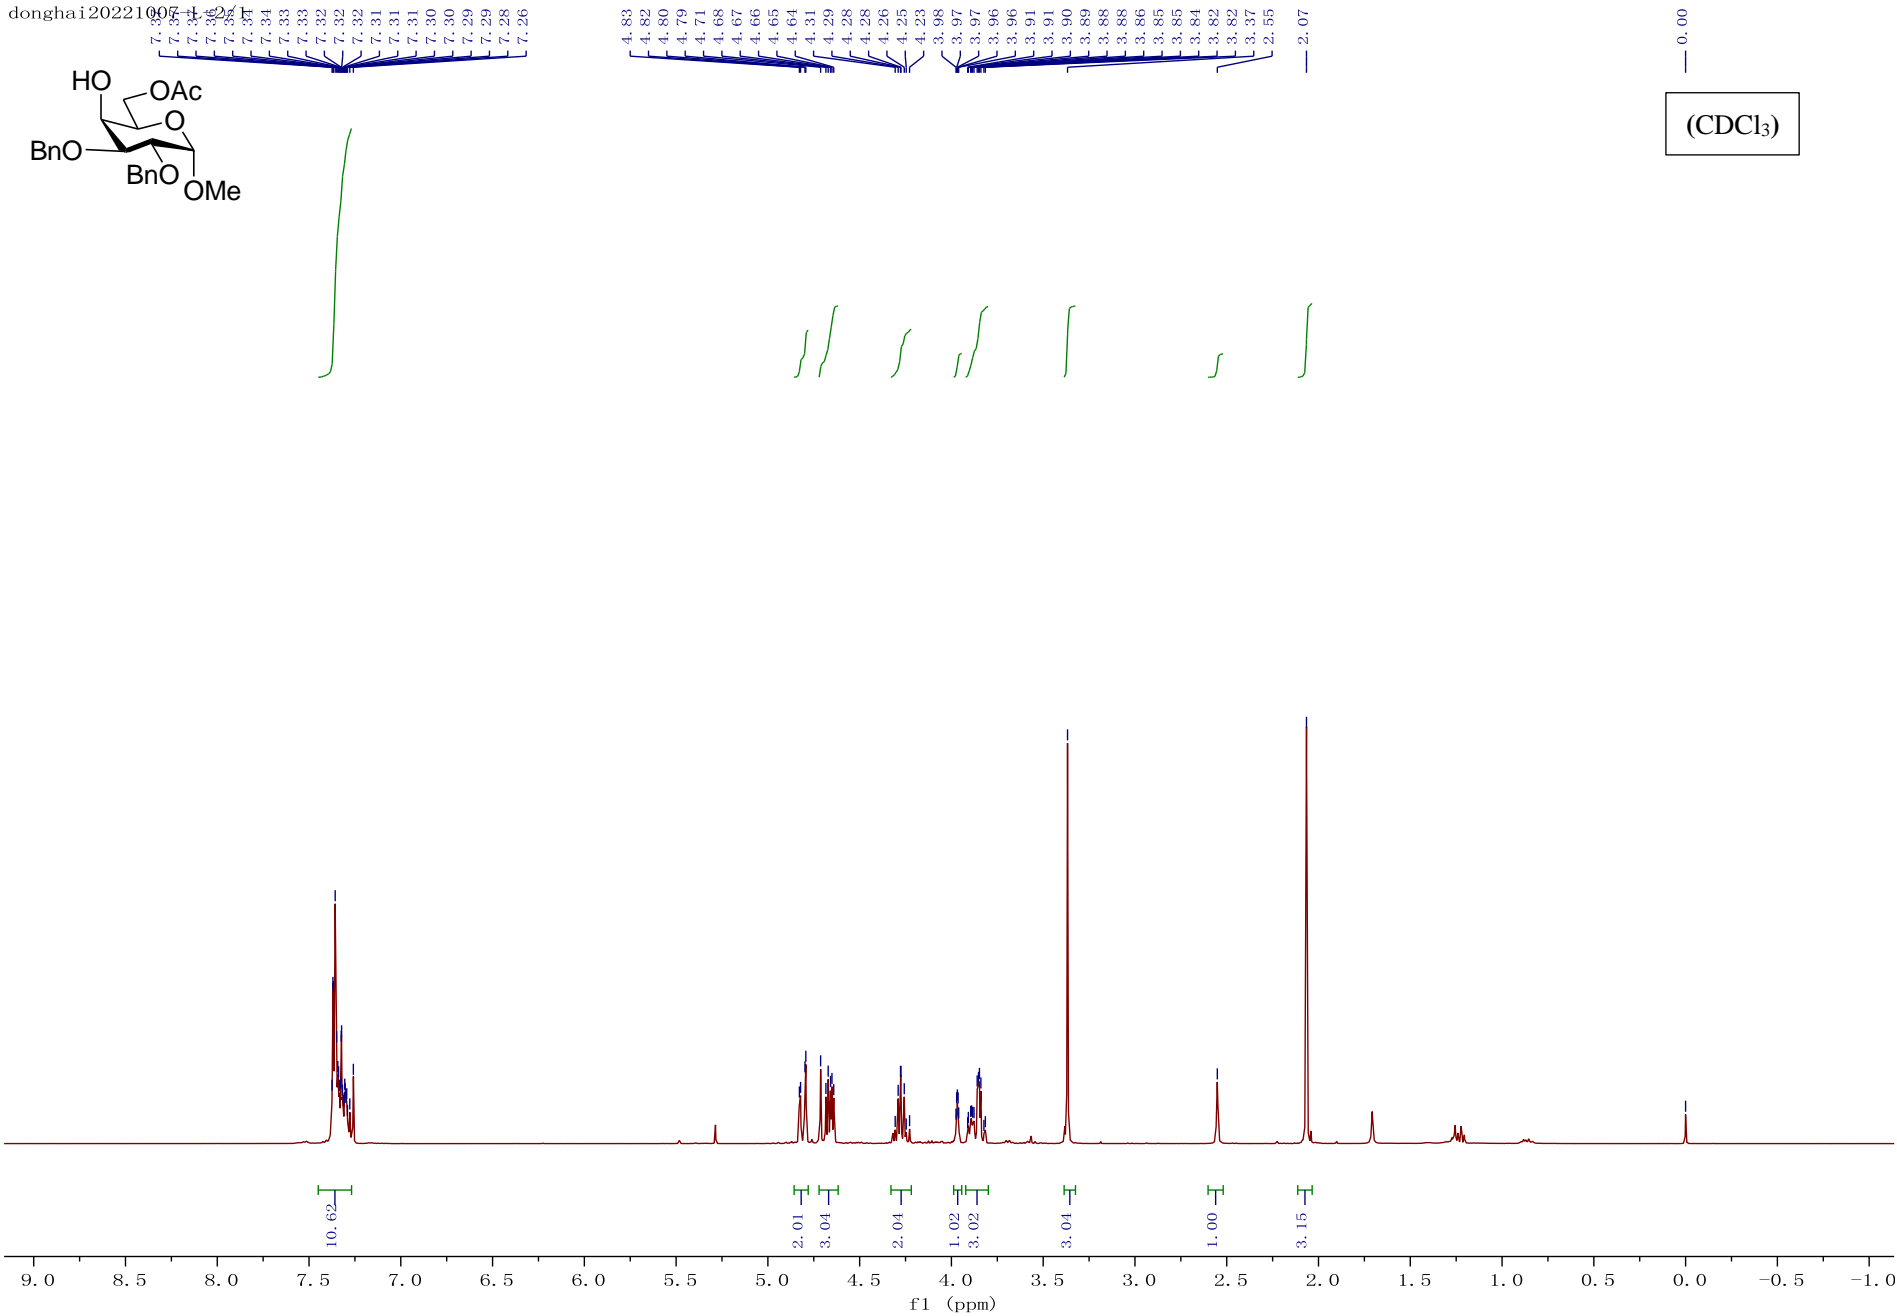

# Methyl 2,3-di-*O*-benzyl-6-acetyl- $\alpha$ -D-galactopyranoside 45

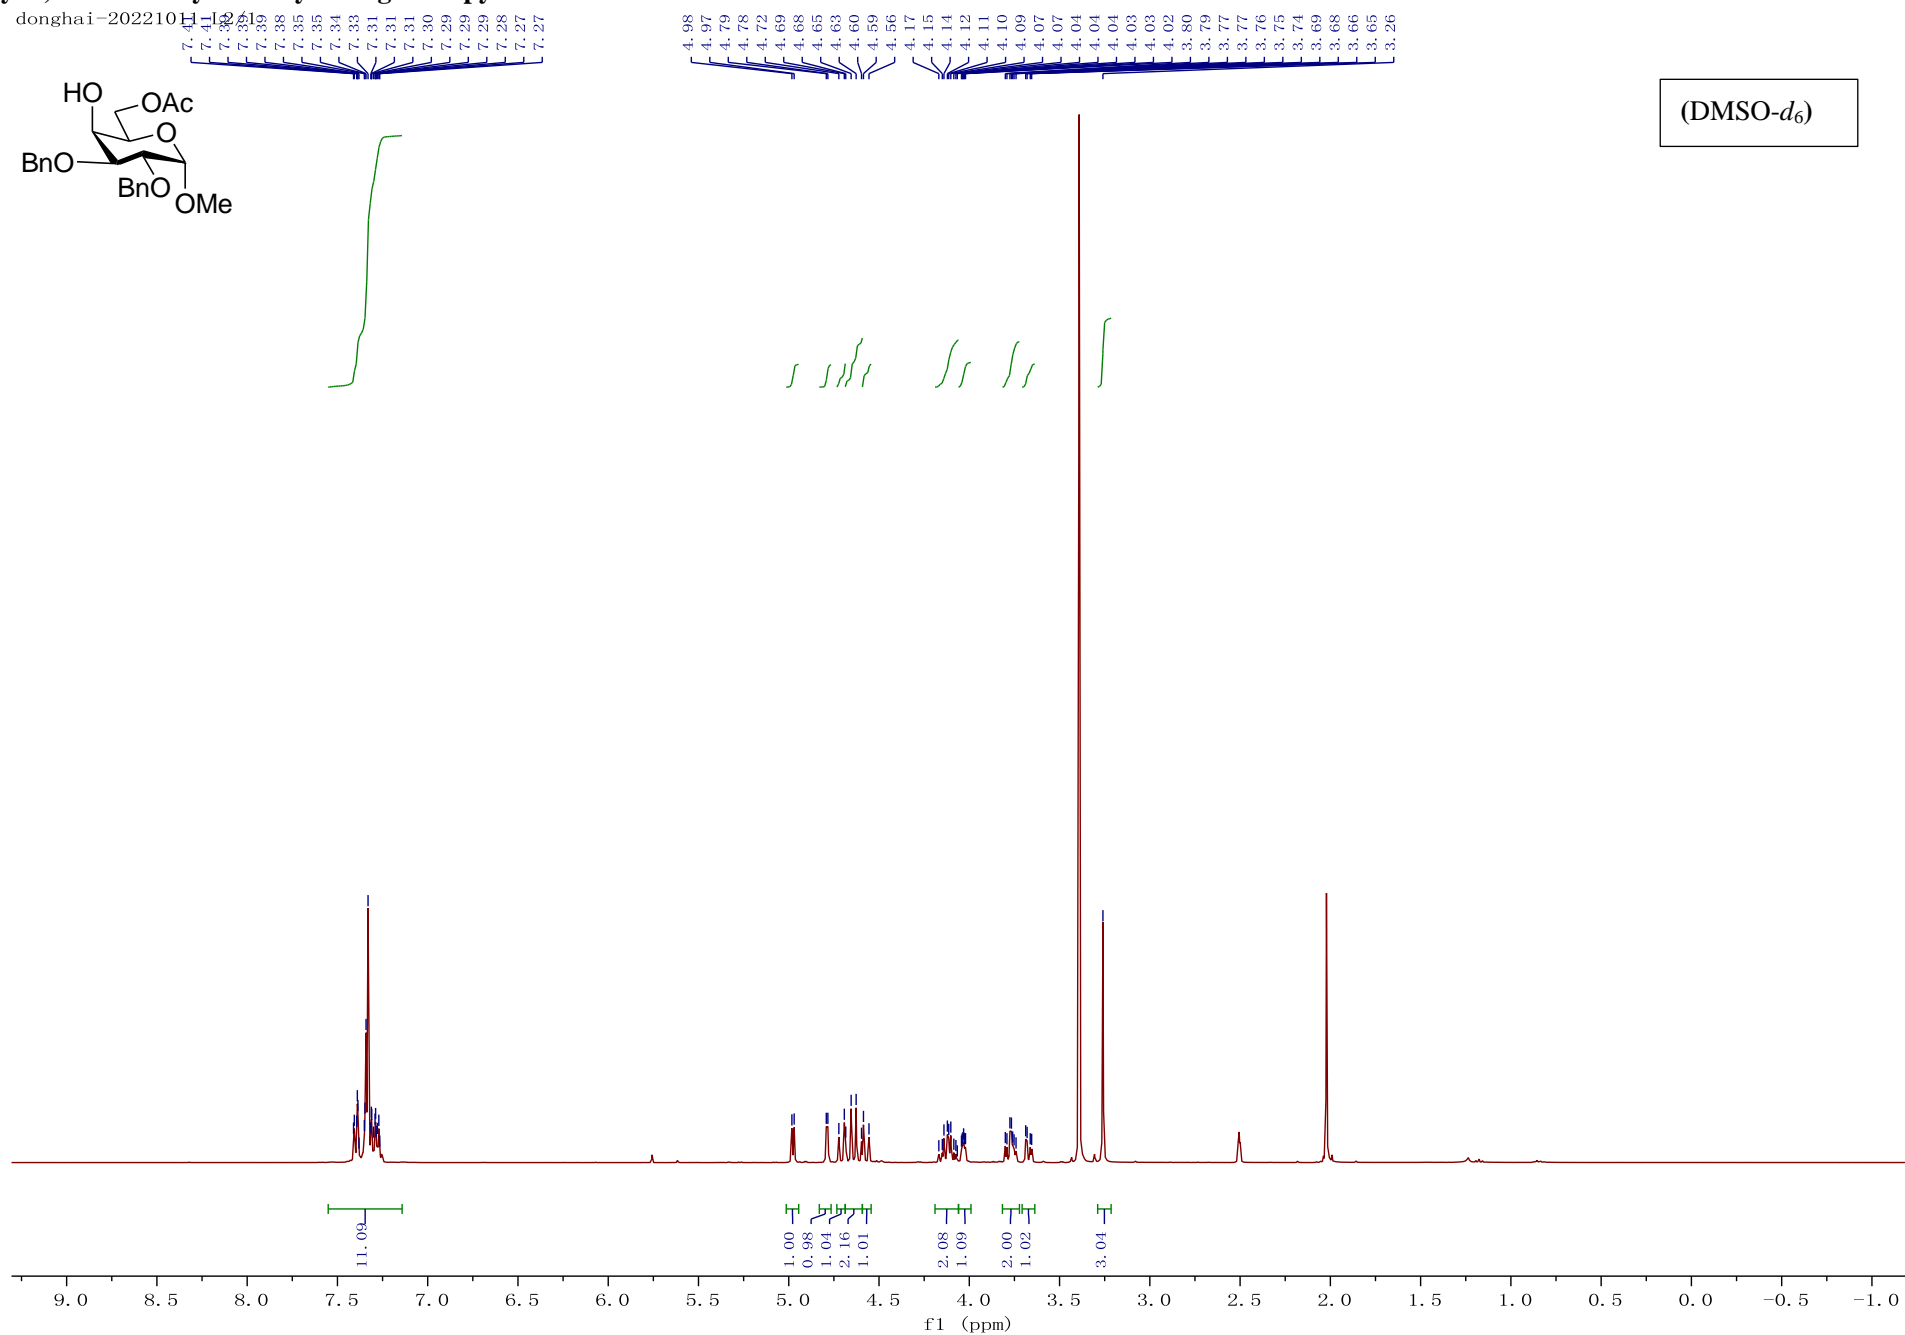

# Methyl 2,3-di-*O*-benzyl-6-acetyl- $\alpha$ -D-mannopyranoside 46

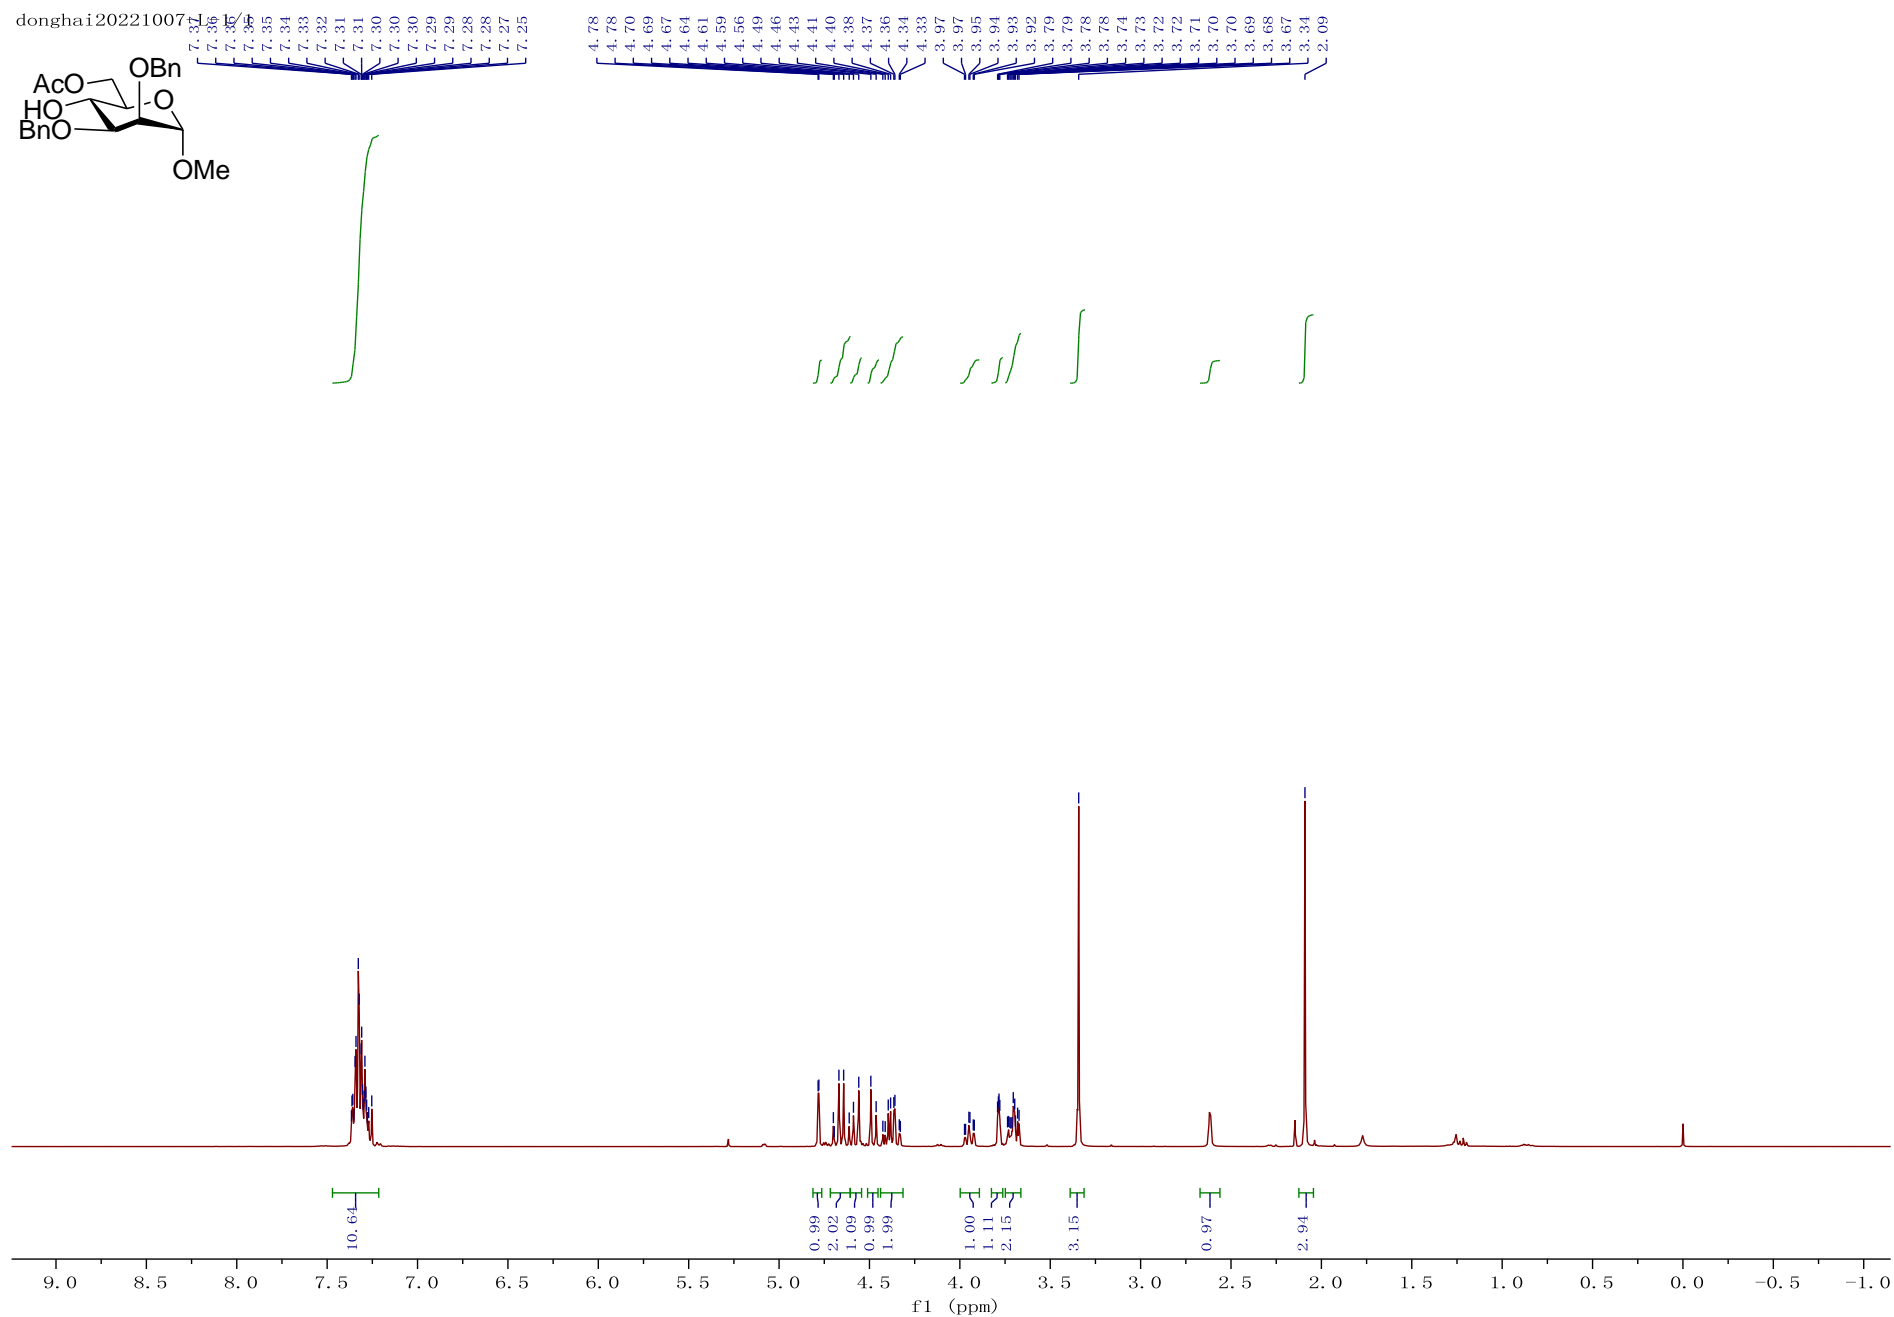

# **Methyl 2,3-di-*O*-benzyl-4,6-di-*O*-acetyl- $\beta$ -D-glucopyranoside 47**

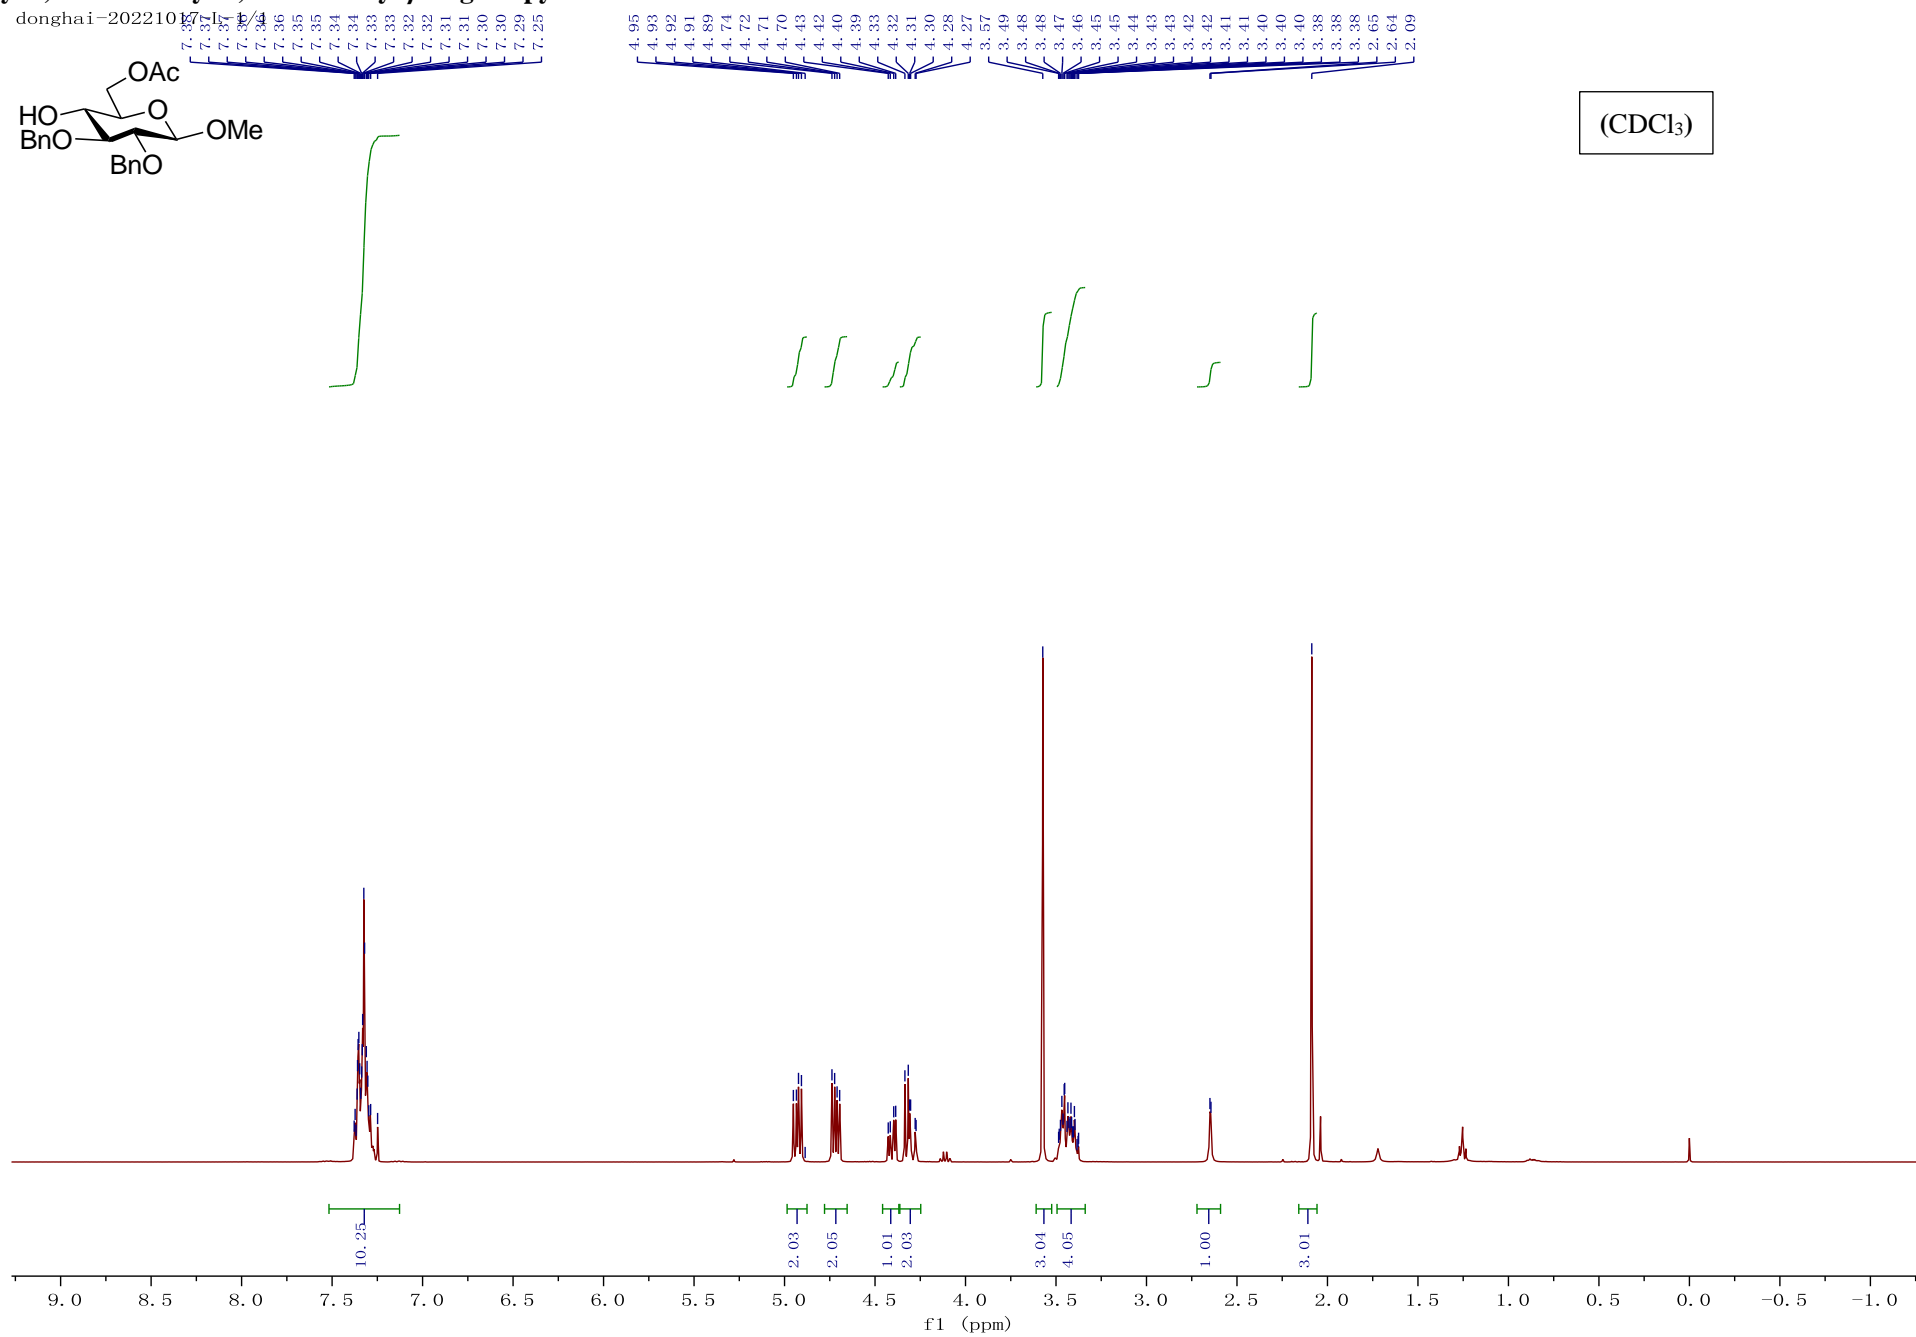



# Methyl 2,3-di-*O*-benzyl-4,6-di-*O*-acetyl- $\beta$ -D-glucopyranoside 47

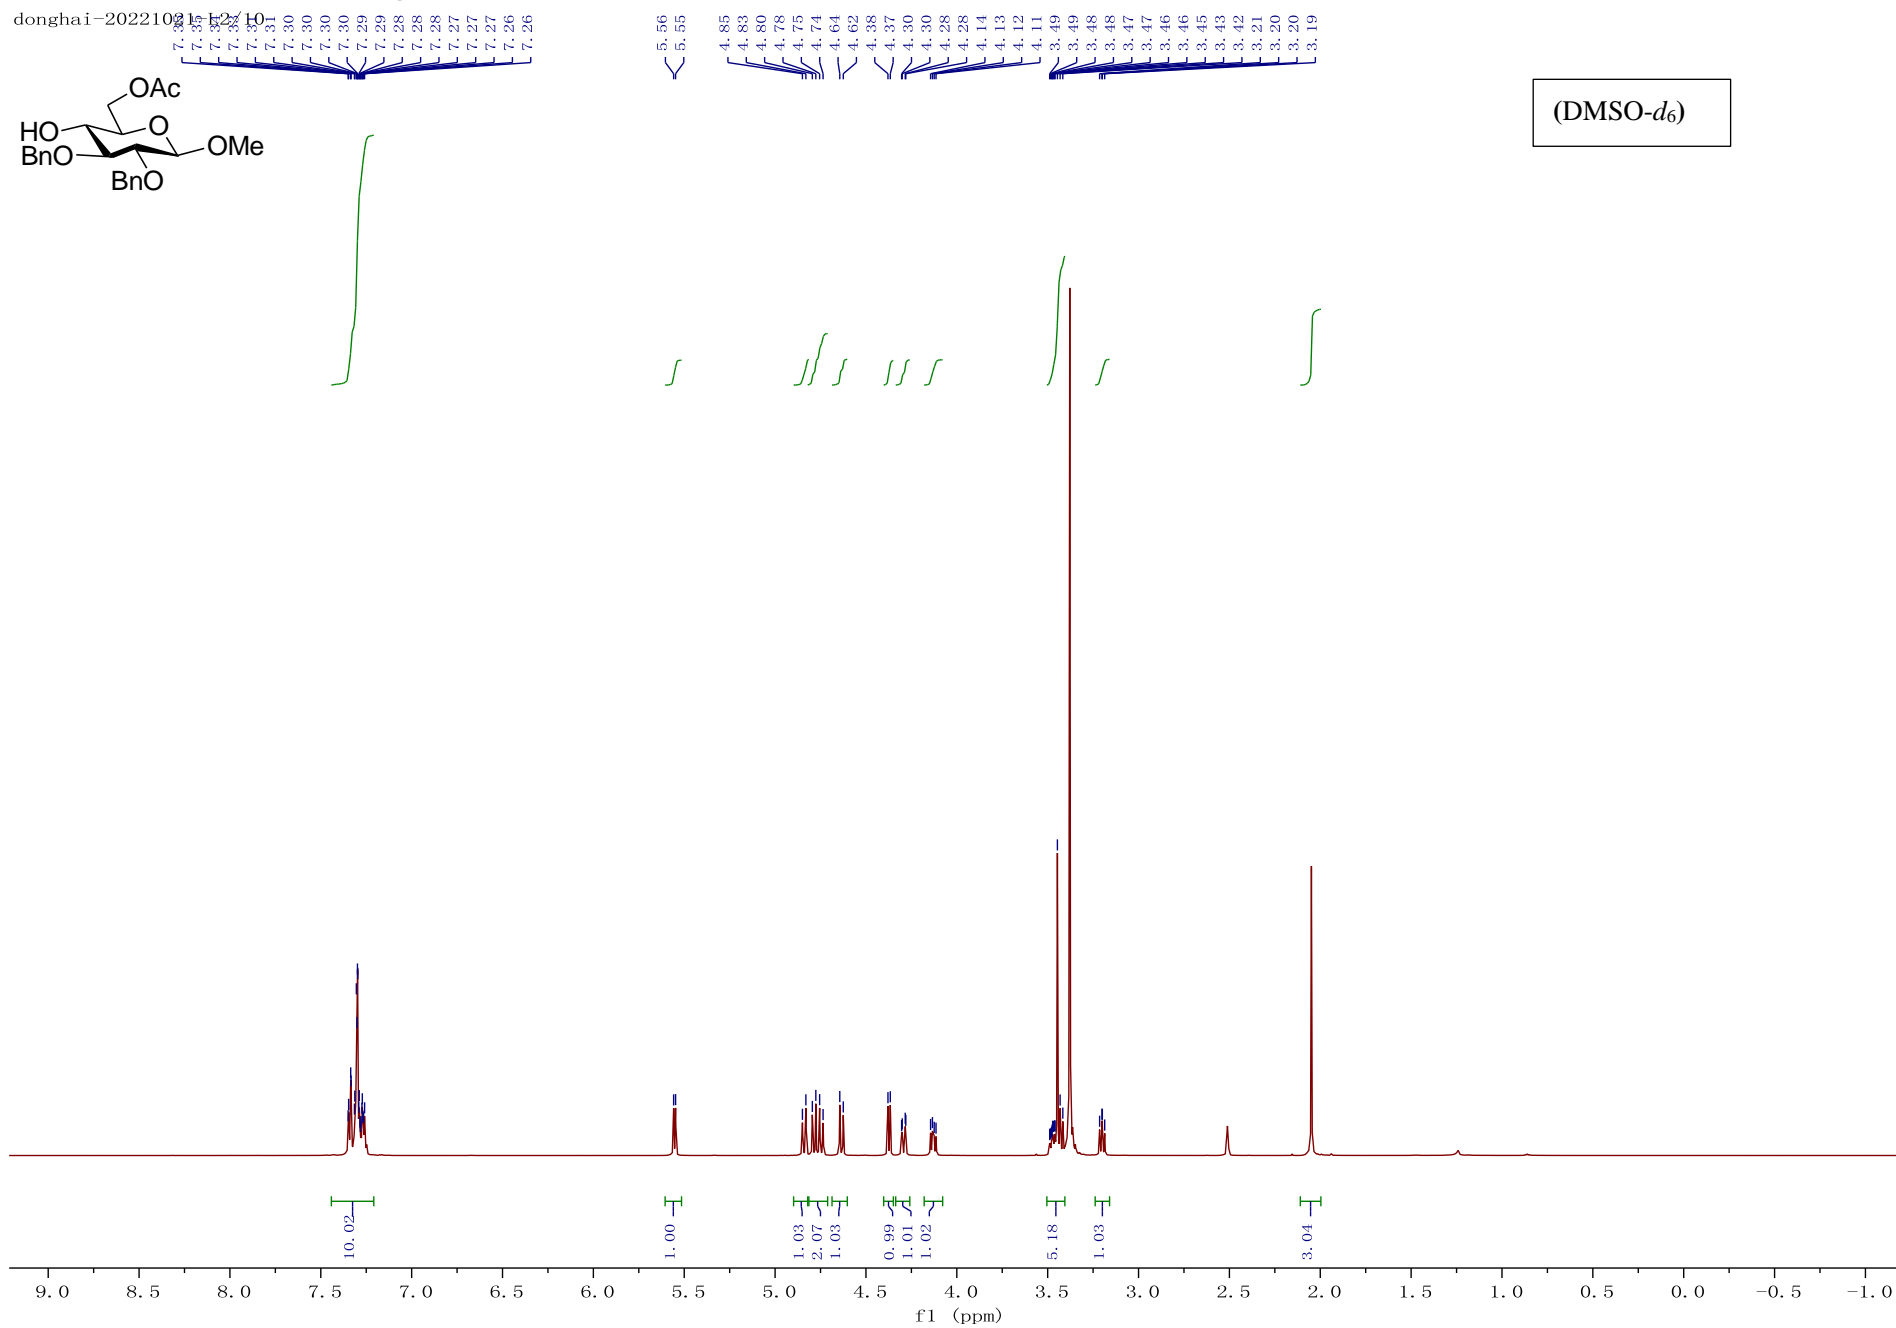

Supplement: s1 [file s1]
